# Supplementary material
Source: MDPI journal article supplement (https://www.mdpi.com/2311-5637/9/4/387)
Supplement: s1 [file s1]

Archive with 6 entries (6 files):
- fermentation-2332799-supplementary.pdf
- Table S2.xlsx
- table S3.xlsx
- table S4.xlsx
- table S5.xlsx
- Table S6.xlsx
