# Supplementary material
Source: MDPI journal article supplement (https://www.mdpi.com/2311-5637/9/4/387)
Supplement: s1 [file s1 › fermentation-2332799-supplementary.pdf]

## **Supplementary Materials**

### **Supporting Methods**

#### **The adsorption of phenol by carbon**

The adsorption of phenol by carbon was tested. 118 mL bottles were used. The bottles were prepared at phenol 1000 mg/L with 10 g/L H260, H320, P500, P700, and deionized water was added to achieve final working volume 60 mL. The pH was controlled at 7.5 by adjusting with 2M NaOH and HCl. All the bottles were kept 37 °C. The supernatant was periodically taken out to measure the concentration of phenol until the phenol concentration was constant. The adsorption tests were prepared in triplicates and performed in a batch mode.

#### **Other analytical methods**

The modified Gompertz model (eq.S1) was applied to quantitatively analyze the methane production with different carbon materials.

$$M(t) = P \times \exp \left\{ -\exp \left[ \frac{R_m \times e}{P} \times (\lambda - t) + 1 \right] \right\} \quad (S1)$$

Where, M(t) is the cumulative methane production (mL) at time t, P is the maximum CH<sub>4</sub> potential (mL CH<sub>4</sub>), R<sub>m</sub> is the maximum CH<sub>4</sub> production rate (mL/d), λ is the lag-phase time (d), and e is 2.71828. The three parameters, P, R<sub>m</sub>, and λ were estimated through global curve fitting using Origin2021 with a minimum residual sum of squared errors between the experimental data and model curves.

Table S1. Phenol adsorption capacity of carbon materials

|                             | H260     | H320     | P500    | P700     |
|-----------------------------|----------|----------|---------|----------|
| adsorption capacity<br>mg/g | 38.27796 | 47.68902 | 50.1762 | 65.65834 |

Table S7. The Pearson analysis of the correlation between Rm and GBs (p&lt;0.05)

| GB                                       | Correlation<br>Coefficient | P value |
|------------------------------------------|----------------------------|---------|
| JAAYED01 sp.FDU002                       | 0.962                      | 0.009   |
| UBA5829 sp.FDU003                        | 0.96                       | 0.010   |
| JACIYB01 sp.FDU005                       | -0.895                     | 0.040   |
| RBG-16-66-30 sp.FDU009                   | -0.974                     | 0.005   |
| DTU080 sp.FDU010                         | -0.969                     | 0.006   |
| JABLXH01 sp.FDU019                       | -0.974                     | 0.005   |
| Aminivibrio sp009929115 FDU030           | -0.893                     | 0.041   |
| UBA1383 sp002304945 FDU043               | -0.92                      | 0.027   |
| UBA8910 sp012517485 FDU045               | -0.937                     | 0.019   |
| Syner-03 sp002316795 FDU047              | -0.956                     | 0.011   |
| UBA5266 sp002411545 FDU050               | -0.995                     | 0.000   |
| Syntrophorhabdus sp.FDU062               | -0.893                     | 0.042   |
| RBG-16-64-13 sp.FDU077                   | 0.981                      | 0.003   |
| UBA2241 sp.FDU081                        | -0.967                     | 0.007   |
| Methanothrix soehngenii FDU082           | 0.924                      | 0.025   |
| SLSP01 sp.FDU089                         | 0.949                      | 0.014   |
| UBA5500 sp.FDU099                        | -0.88                      | 0.049   |
| DTU098 sp002305915 FDU100                | -0.995                     | 0.000   |
| JAAYDC01 sp.FDU104                       | 0.953                      | 0.012   |
| Methanobacterium sp.FDU106               | -0.908                     | 0.033   |
| DTIW01 sp.FDU109                         | 0.995                      | 0.000   |
| JACIYD01 sp.FDU114                       | 0.97                       | 0.006   |
| Proteiniphilum saccharofermentans FDU115 | -0.895                     | 0.040   |
| DSUL01 sp.FDU122                         | -0.93                      | 0.022   |
| UBA2219 sp.FDU124                        | -0.951                     | 0.013   |
| JAAYAV01 sp.FDU126                       | -0.904                     | 0.035   |
| UBA6126 sp.FDU137                        | 0.896                      | 0.039   |

|                                   |        |       |
|-----------------------------------|--------|-------|
| UBA2279 sp.FDU144                 | 0.916  | 0.029 |
| DTKZ01 sp.FDU153                  | -0.934 | 0.020 |
| PALSA-986 sp.FDU155               | -0.958 | 0.010 |
| RBG-16-64-13 sp.FDU161            | -0.952 | 0.013 |
| RBG-16-64-13 sp.FDU169            | 0.996  | 0.000 |
| Aminobacterium colombiense FDU170 | -0.909 | 0.033 |
| UBA5072 sp.FDU171                 | -0.879 | 0.049 |
| JAAZJW01 sp012519835 FDU174       | -0.971 | 0.006 |
| UBA11386 sp.FDU177                | 0.932  | 0.021 |
| Methanolinea sp.FDU180            | -0.885 | 0.046 |
| UBA8910 sp002069605 FDU181        | -0.969 | 0.007 |
| JAAYEA01 sp012689325 FDU183       | 0.982  | 0.003 |
| B3-TA06 sp012517375 FDU192        | -0.979 | 0.004 |
| Bryobacteraceae sp.FDU199         | -0.982 | 0.003 |
| UBA1419 sp002305585 FDU201        | -0.893 | 0.041 |
| UBA2241 sp.FDU202                 | -0.916 | 0.029 |
| Fen-1342 sp.FDU205                | -0.902 | 0.036 |
| Bact-08 sp009929175 FDU206        | -0.974 | 0.005 |
| UBA4810 sp002418825 FDU208        | 0.971  | 0.006 |

---
