# Supplementary material
Source: MDPI journal article supplement (https://www.mdpi.com/2311-5637/9/4/387)
Supplement: s1 [file s1 › Table S2.xlsx]

## Sheet: fianl
Table S2.Summary of relative abundance of related genes
Name	KO entry	Enzyme number	Description	Relative abundance
				C	HC260	HC320	BC500	BC700
Conversion on benzene ring
bsdC	K01612	4.1.1.61	4-hydroxybenzoate decarboxylase subunit C	14.77±10.81	4.17±0.77	12.88±4.74	20.06±4.77	24.64±1.57
bsdB	K03186	4.1.1.61	4-hydroxybenzoate decarboxylase subunit B	329.41±32.09	414.23±48.67	368.59±15.5	442.79±20.15	324.3±16.73
bsdD	K21759	4.1.1.61	4-hydroxybenzoate decarboxylase subunit D	0.8±0.13	1.21±0.23	1.15±0.09	0.66±0.11	0.57±0.2
hbaA	K04105	6.2.1.27	4-hydroxybenzoate-CoA ligase
hcrC	K04107	1.1.7.1	4-hydroxybenzoyl-CoA reductase subunit gamma
hcrA	K04108	1.1.7.1	4-hydroxybenzoyl-CoA reductase subunit alpha
hcrB	K04109	1.1.7.1	4-hydroxybenzoyl-CoA reductase subunit beta
Benzoyl-CoA degradation
bcrC	K04112	1.3.7.8	benzoyl-CoA reductase subunit C	0.03±0.01	0.16±0.13	0.57±0.41	2.05±0.19	2.55±2.18
bcrB	K04113	1.3.7.8	benzoyl-CoA reductase subunit B
bcrA	K04114	1.3.7.8	benzoyl-CoA reductase subunit A	19.91±15.43	3.92±0.47	5.01±0.15	5.33±0.45	5.03±0.52
bcrD	K04115	1.3.7.8	benzoyl-CoA reductase subunit D	19.91±15.43	3.92±0.47	5.01±0.15	5.33±0.45	5.03±0.52
bamB	K19515	1.3.-.-	benzoyl-CoA reductase subunit BamB	354.82±76.64	107.44±22.26	128.49±24.34	73.44±3.47	64.74±14.7
bamC	K19516	1.3.-.-	benzoyl-CoA reductase subunit BamC	0±0.01	3.91±0.76	1.8±0.94	0.02±0.02	0±0
dch	K07537	4.2.1.100	cyclohexa-1,5-dienecarbonyl-CoA hydratase	15.83±15.46	0.83±0.1	0.98±0.84	45.06±11.3	35.72±0.54
had	K07538	1.1.1.368	6-hydroxycyclohex-1-ene-1-carbonyl-CoA dehydrogenase	156.43±34.14	45.48±10.28	40.86±0.45	51.14±8.21	33.33±1.63
oah	K07539	3.7.1.21	6-oxocyclohex-1-ene-carbonyl-CoA hydrolase	193.08±42.67	64.16±19.62	106.34±29.33	53.71±7.23	33.07±2.36
Carbon chain shortening
fadJ	K01782	1.1.1.35	3-hydroxyacyl-CoA dehydrogenase	1.56±0.2	2.67±0.48	2.78±0.43	55.96±7.96	10.92±0.5
fadB	K01825	1.1.1.35	3-hydroxyacyl-CoA dehydrogenase	19.71±1.62	14.91±1.52	11.59±1.75	20.03±2.4	18.27±1.16
fadN	K07516	1.1.1.35	3-hydroxyacyl-CoA dehydrogenase	38.6±1.45	37.24±2.23	33.35±2.67	100.6±11.78	39.18±2.42
fadA	K00632	2.3.1.16	acetyl-CoA acyltransferase	18.92±0.81	21.93±0.78	23.02±1.29	103.93±4.45	43.41±1.58
acd	K16173	1.3.99.32	glutaryl-CoA dehydrogenase	191.98±15.69	58.59±15.52	92.72±27.83	34.86±19.49	6.73±1.62
gcdA	K01615	7.2.4.5	glutaconyl-CoA decarboxylase subunit alpha	173.91±33.92	54.18±15.21	90.39±28.16	9.1±5.53	1.2±0.17
gcdB	K20509	7.2.4.1	carboxybiotin decarboxylase	237.34±16.27	183.03±96.96	119.49±26.85	209.5±6.64	209.51±64.91
gcdC	K23351	7.2.4.5	glutaconyl-CoA decarboxylase subunit gamma	83.79±20.3	148.48±77.4	56.74±7.51	214.95±6.27	225.67±66.38
gcdD	K23352	7.2.4.5	glutaconyl-CoA decarboxylase subunit delta	5.38±1.31	0±0	0±0	5.12±0.59	5.07±0.55
GCDH	K00252	1.3.8.6	glutaryl-CoA 2,3-oxidoreductase	8.94±0.46	7.87±0.48	8.54±0.72	61.78±8.1	17.93±0.14
echA	K01692	4.2.1.17	enoyl-CoA hydratase	48.39±2.86	60.28±4.49	64.78±6.01	146.97±11.31	107.36±13.12
fadJ	K01782	4.2.1.17	enoyl-CoA hydratase	1.56±0.2	2.67±0.48	2.78±0.43	55.96±7.96	10.92±0.5
fadB	K01825	4.2.1.17	enoyl-CoA hydratase	19.71±1.62	14.91±1.52	11.59±1.75	20.03±2.4	18.27±1.16
fadB	K13767	4.2.1.17	enoyl-CoA hydratase	1.41±1.06	0.64±0.24	0.22±0.21	0.17±0.21	0.13±0.12
hbd	K00074	1.1.1.157	3-hydroxybutyryl-CoA dehydrogenase	260.03±20.87	132.54±21.91	167.57±22.8	251.36±6.25	236.53±80.43
ACAT	K00626	2.3.1.9	acetyl-CoA C-acetyltransferase	622.03±11.3	506.34±9.63	546.59±29.7	761.51±31.63	657.86±86.73
Aceticlastic methanogenesis
cdhC	K00193	2.3.1.169	acetyl-CoA decarbonylase	308.53±15.25	346.99±11.95	349.88±11.99	345.16±20.01	311.08±9.79
cdhE	K00197	2.1.1.245	acetyl-CoA decarbonylase	330.49±34.15	354.51±12.04	363.86±15.66	383.32±9.21	359.61±18.93
cdhD	K00194	2.1.1.245	acetyl-CoA decarbonylase	331.27±34.11	356.19±12.19	365.68±15.8	387.82±8.98	364.22±18.07
mtrC	K00579	2.1.1.86	tetrahydromethanopterin S-methyltransferase subunit C	304.33±13.88	339.07±9.67	347.63±14.97	333.87±21.14	300.95±7.93
mtrB	K00578	2.1.1.86	tetrahydromethanopterin S-methyltransferase subunit B	14.43±2.14	4.5±0.19	5.25±0.48	7.08±0.45	8.76±0.71
mtrD	K00580	2.1.1.86	tetrahydromethanopterin S-methyltransferase subunit D	304.33±13.88	339.07±9.67	347.63±14.97	333.87±21.14	300.95±7.93
mtrE	K00581	2.1.1.86	tetrahydromethanopterin S-methyltransferase subunit E	224.86±12.32	256.88±14.11	267.75±16.59	265.29±24.83	239.91±9.46
mtrF	K00582	2.1.1.86	tetrahydromethanopterin S-methyltransferase subunit F
mtrG	K00583		tetrahydromethanopterin S-methyltransferase subunit G	3.25±0.26	3.48±0.24	4.23±0.61	3.51±0.14	4.78±0.34
mtrH	K00584	2.1.1.86	tetrahydromethanopterin S-methyltransferase subunit H	278.98±14.26	328.2±4.71	335.03±11.79	308.62±14.49	250.25±13.19
mcrA	K00399	2.8.4.1	methyl-coenzyme M reductase alpha subunit	330.82±11.8	362.26±8.68	370.06±10.97	380.97±26.23	356.76±10.05
	K00400		methyl coenzyme M reductase system, component A2	303.33±15.03	334.21±7.95	339.37±11.68	349.46±25.12	335.82±12.38
mcrB	K00401	2.8.4.1	methyl-coenzyme M reductase beta subunit	334.34±14.42	362.32±10.68	369.67±10.31	383.13±25.47	359.79±7.55
mcrG	K00402	2.8.4.1	methyl-coenzyme M reductase gamma subunit	330.82±11.8	362.26±8.68	370.06±10.97	380.97±26.23	356.76±10.05
mcrC	K03421	2.8.4.1	methyl-coenzyme M reductase subunit C	297.21±13.96	340.42±10.73	344.72±9.3	334.55±20.86	294.42±10.88
mcrD	K03422	2.8.4.1	methyl-coenzyme M reductase subunit D	330.82±11.8	362.26±8.68	370.06±10.97	380.97±26.23	356.76±10.05
hdrA2	K03388	1.8.7.3	heterodisulfide reductase subunit A1	613.37±4.22	495±19.89	551.63±22.24	521.01±37.24	470.91±30.4
hdrB2	K03389	1.8.7.3	heterodisulfide reductase subunit B1	325.93±15.11	364.68±8.07	377±17.28	364.61±9.08	287.05±6.28
hdrC2	K03390	1.8.7.3	heterodisulfide reductase subunit C1	325±15.28	363.42±7.63	375.78±17	364.56±8.71	289.64±5.99
hdrD	K08264	1.8.98.1	heterodisulfide reductase subunit D	290.41±10.18	331.21±11.1	333.47±5.56	317.26±10.85	282.27±9.14
hdrE	K08265	1.8.98.1	heterodisulfide reductase subunit E	262.05±11.21	308.75±11.61	310.41±5.89	267.79±14.64	205.85±7.18
