# Supplementary material
Source: MDPI journal article supplement (https://www.mdpi.com/2311-5637/9/4/387)
Supplement: s1 [file s1 › table S3.xlsx]

## Sheet: Sheet1
Table S3 Summary of the GBs with high quality
GB	Genome size (bp)	GC content	N50	Completeness estimated considering taxonomic assignment (%)	contamination (%)	Coverage value in C		Coverage value in HC260		Coverage value in HC320		Coverage value in BC500		Coverage value in BC700
						Average value	STD	Average value	STD	Average value	STD	Average value	STD	Average value	STD
UBA4975 sp012727415 FDU001	1858836	0.523	81739	93.71	1.694	0.01075	0.00320914	0.00427533	0.00172793	0.001966	0.00141376	3.22468	1.32801	61.8671	50.9361
JAAYED01 sp.FDU002	2759860	0.625	18513	94.49	3.771	1.01041	0.0355083	2.01752	0.0871371	2.61626	0.429004	0.816888	0.0661396	0.764444	0.158554
UBA5829 sp.FDU003	3626099	0.543	27915	95.37	0.925	1.72296	1.27529	9.82402	1.24115	7.1356	0.199705	2.04346	1.1732	0.00343067	0.00330829
T3SED10-260 sp.FDU004	2092884	0.411	12237	93.75	1.785	0	0	7.29022	2.53344	2.53287	0.660055	3.13572	2.35021	0	0
JACIYB01 sp.FDU005	1721144	0.432	5686	83.11	0.714	0.836449	0.193659	0.219273	0.0408057	0.218049	0.0246343	0.72954	0.237178	0.653482	0.123458
UBA8901 sp.FDU006	2656403	0.629	18927	98.9	1.263	2.23141	0.191882	0.699566	0.0988478	0.951985	0.176374	0.43123	0.0418006	0.568551	0.0135786
Ch29 sp.FDU007	2209068	0.486	10510	91.5	2.016	0.113832	0.0180117	0.436924	0.135473	0.440911	0.0773559	0.364686	0.116013	1.2292	0.229433
Propionicimonas sp.FDU008	2203740	0.672	6042	73.31	1.939	3.00997	0.219873	3.20154	0.170811	2.33648	0.318768	8.07345	0.764191	10.1398	0.847949
RBG-16-66-30 sp.FDU009	2315684	0.668	3964	70.4	4.326	0.706303	0.0257738	0.344589	0.0320027	0.276824	0.0042281	0.662342	0.0790322	0.899562	0.056148
DTU080 sp.FDU010	4294718	0.604	8409	87.25	3.446	0.984741	0.0874839	0.154198	0.0220883	0.104319	0.00886135	0.801852	0.0565553	1.13383	0.100781
UBA6794 sp.FDU011	1553153	0.365	8584	77.96	2.542	1.18182	0.201706	1.77575	0.0564387	1.77568	0.0643261	1.53539	0.202171	1.50003	0.105476
UBA5829 sp.FDU012	4769892	0.56	124047	95.37	2.942	3.41365	0.168614	1.24938	0.0934667	0.594923	0.0584976	3.41383	1.58278	2.02568	0.193999
Syntrophobacterales sp.FDU013	3179167	0.689	15834	94.67	1.026	0.823768	0.0302487	0.634955	0.0288035	0.767511	0.0120993	0.680189	0.0491905	0.85929	0.0793067
JABUFB01 sp.FDU014	5713614	0.645	21162	94.44	2.777	2.88249	0.206665	1.84452	0.113309	1.28498	0.276129	0.0256273	0.00952334	0.0144587	0.00363274
DUNV01 sp.FDU015	2214128	0.456	4781	80.66	2.294	0.123431	0.0612016	0.730879	0.178363	1.14983	0.563711	26.5828	13.1623	31.4932	10.5738
JAAYBY01 sp.FDU016	2786473	0.613	4682	85.21	4.1	0.45466	0.0325638	0.925911	0.0689465	0.702368	0.0982184	0.774213	0.00977538	0.442141	0.00995335
JAAYIR01 sp012523355 FDU017	3288458	0.641	16983	92.59	3.24	1.01658	0.0400437	0.714255	0.0342875	0.463794	0.0409477	0.819399	0.0516615	1.30271	0.0534927
Fermentibacter sp.FDU018	2460710	0.661	53603	91.75	2.197	5.81337	0.374971	1.56825	0.179821	2.60242	0.399566	2.5693	0.241202	3.43788	0.666481
JABLXH01 sp.FDU019	4129742	0.591	6395	90.98	2.263	0.951682	0.122329	0.123553	0.0201507	0.0482678	0.0110353	0.821308	0.0687165	1.02787	0.0961395
58-81 sp012729145 FDU020	2023050	0.56	45190	98.3	1.848	1.41466	0.21205	1.21793	0.319212	1.99378	0.610774	5.39067	1.07199	3.95452	0.546865
Brooklawnia sp012517405 FDU021	2539491	0.658	9073	94.54	1.324	18.0711	1.58523	18.27	1.3159	14.2852	1.25059	27.6927	0.770675	32.7412	2.80735
Mariniphaga sp.FDU022	3512607	0.416	14244	97.58	4.435	0.505306	0.0387766	0.072264	0.00785017	0.042455	0.0103303	4.94819	0.536958	4.01221	0.189309
JAAYUK01 sp012517735 FDU023	2898756	0.553	27794	97.97	2.727	1.88517	0.116796	0.773927	0.0877797	1.0051	0.050463	1.13427	0.108816	1.97166	0.0482674
MWBF01 sp.FDU024	4110770	0.659	15453	73.81	4.545	0.989459	0.0440253	3.25354	0.0876856	2.21199	0.209008	1.66559	0.16062	0.683854	0.116455
Cloacimonas sp002432865 FDU025	2137031	0.366	8450	98.9	1.098	2.9022	0.376102	0.556595	0.0671114	1.41203	0.122954	0.00258367	0.00365386	0	0
UBA5420 sp.FDU026	2794309	0.488	19374	93	1.8	0.125295	0.00975503	0	0	0	0	1.07599	0.194686	2.80863	2.01615
Pirellulales sp.FDU027	7191775	0.648	53796	98.85	1.149	9.78389	0.391513	7.76499	0.474256	6.50119	0.0485099	5.89795	0.27425	6.40708	0.136016
JAAZMI01 sp.FDU028	2343992	0.474	63510	93.85	0	17.4737	14.4652	0.0146083	0.00857975	0.00967933	0.00691729	0.008531	0.000558087	0.270215	0.0870983
DTU010 sp.FDU029	2197431	0.493	42632	95.76	0.847	0.229461	0.00959724	0.00531667	0.000959616	0	0	1.75328	0.366873	6.57646	2.2765
Aminivibrio sp009929115 FDU030	2796957	0.601	7827	76.51	4.314	1.57858	0.0898771	1.0983	0.0280116	1.25642	0.187065	1.71212	0.0816565	2.40228	0.100122
Methanothrix_A sp001602645 FDU031	2572732	0.597	16561	99.34	0	2.96563	0.122364	3.25844	0.11955	4.12898	0.61139	3.20465	0.141744	4.45704	0.18202
MVQK01 sp.FDU032	2318586	0.528	24924	92.91	2.848	0.194203	0.160358	0	0	0.00264067	0.00228262	2.12061	1.72483	4.50609	2.87196
LD21 sp.FDU033	3525461	0.456	20545	96	1.666	24.8508	1.21163	18.7501	1.87488	21.0656	1.51046	16.7642	1.05889	17.7601	2.18386
DSM-8532 sp.FDU034	2936401	0.52	59291	98.25	3.146	0.004679	0.000532464	49.7834	31.4306	0.029927	0.0292327	0.00374733	0.000870025	0.004275	0.00176936
UBA1398 sp.FDU035	5008535	0.691	3904	80.57	2.191	1.33731	0.0627852	0.347479	0.0512062	0.44512	0.0251026	0.265072	0.0492612	0.821864	0.0365709
DTU024 sp.FDU036	1999602	0.639	20545	92.74	1.209	0.633705	0.0632149	0.498579	0.026892	0.454736	0.0555595	1.2543	0.0345255	1.06856	0.188928
UBA4179 sp002849245 FDU037	2528331	0.422	18168	95.49	1.384	1.37412	0.0404562	0.646429	0.0579784	0.554136	0.0458348	0.827362	0.0686763	1.04187	0.0884396
Syntrophosphaera sp012516855 FDU038	1953543	0.543	54503	95.6	0	12.9884	2.31374	0.0836923	0.00169849	0.0807233	0.00860264	0.005593	0.000334534	0.00304933	0.00237211
DUOT01 sp.FDU039	1891122	0.337	46415	98.66	2.666	0	0	0.012457	0.00980917	0.009523	0.00783411	4.15472	0.570517	0	0
Desulfovibrionaceae sp.FDU040	3814884	0.648	22366	98.29	1.19	1.07855	0.0616588	0.713051	0.0550874	0.569232	0.0168935	0.63337	0.0286941	1.08667	0.0322905
UBA2224 sp012719295 FDU041	5261397	0.643	29644	98.9	2.297	0.486772	0.0633395	0.169649	0.0198274	0.336568	0.0327177	5.73612	2.7452	1.50464	0.175168
Cloacimonadaceae sp.FDU042	2692601	0.475	28130	97.8	1.098	0	0	11.5594	4.23573	5.25925	0.420704	0.02229	0.0274173	0	0
UBA1383 sp002304945 FDU043	2614203	0.717	13047	96.25	2.777	2.85516	0.176245	2.34093	0.178069	1.88481	0.137856	4.29226	0.179277	4.24271	0.316164
Bact-08 sp001897515 FDU044	1988110	0.414	15061	93.46	0.952	0.104062	0.0231356	0	0	0	0	1.44644	0.210964	1.12864	0.113017
UBA8910 sp012517485 FDU045	3244407	0.378	8521	98.3	0	1.89579	0.0625108	1.65432	0.0412952	1.41533	0.149729	1.95388	0.153003	1.98448	0.101706
UBA2199 sp.FDU046	2538618	0.663	6106	81.49	3.988	1.01558	0.0310328	0.457348	0.0226005	0.497282	0.014982	0.570732	0.0385474	0.890978	0.0203763
Syner-03 sp002316795 FDU047	1899639	0.506	20343	100	1.694	0.854249	0.0239015	0.385926	0.0397774	0.410312	0.0665275	1.32436	0.0852501	1.65408	0.152943
DSUL01 sp.FDU048	3589726	0.633	8541	87.5	1.851	2.26392	0.026121	2.32465	0.340169	2.44302	0.375742	2.30854	0.208151	3.16004	0.150645
JAAYKS01 sp.FDU049	2474029	0.583	24536	94.68	0.118	0.84006	0.0336421	0.920375	0.0393174	0.964918	0.0677875	0.425705	0.0656385	0.552239	0.0461881
UBA5266 sp002411545 FDU050	2665977	0.355	24697	97.58	1.075	1.69641	0.218107	0.173276	0.0334847	0.2035	0.0201976	1.74715	0.39851	2.14346	0.176376
UBA5829 sp.FDU051	3870507	0.466	19406	92.59	2.006	2.78252	0.112415	0.597023	0.0476928	0.675597	0.0422788	1.46755	0.117626	3.0863	0.221758
JAAYIG01 sp012523595 FDU053	3985901	0.45	21263	98.9	3.361	0	0	14.1762	0.553961	0.002081	0.00294298	0	0	0	0
Methanolinea sp002067485 FDU054	1561665	0.536	10140	79.74	0.163	7.90696	0.205207	4.06324	0.28483	4.92935	0.227873	4.80937	0.459653	5.50926	0.516373
DUVQ01 sp.FDU055	4159941	0.687	55095	87.31	1.797	0.000523	0.000739634	3.39205	0.19686	3.35428	0.16287	2.01687	1.75233	0.000366333	0.000518074
UBA1032 sp.FDU056	2458881	0.479	39123	100	2.197	4.81534	1.38744	0.0586697	0.0440562	0.486223	0.180571	3.04399	0.703507	1.94661	1.57676
MVQL01 sp.FDU057	2650888	0.47	65631	98.32	1.582	0.00183267	0.00132738	0.002826	0.000207891	0.00311667	0.000314314	22.8374	20.0948	0.00219967	0.0015889
Acetoanaerobium noterae FDU058	2288095	0.335	6605	91.39	3.636	1.73067	0.13227	0.495221	0.0236549	0.628198	0.0611072	1.05326	0.0788465	0.222433	0.0109726
JAAYCB01 sp.FDU059	9564326	0.639	8636	97.03	4.769	0.958872	0.299192	0.82468	0.00591347	0.733908	0.0338207	5.7332	1.43573	1.02515	0.452976
Petrimonas sp002356435 FDU060	2867509	0.449	10519	95.91	3.328	8.8553	0.355041	1.83038	0.0547487	1.30433	0.0464424	3.91916	0.175404	7.19965	0.3421
Fen-1364 sp.FDU061	3475560	0.687	4505	74.4	3.2	0.799739	0.047446	0.42839	0.0362576	0.441423	0.0221131	0.607963	0.057289	0.671388	0.0837733
Syntrophorhabdus sp.FDU062	2036060	0.44	14599	75.48	4.016	1.13337	0.0402754	0.730209	0.0305675	0.923916	0.108943	1.05404	0.0569693	1.23001	0.131844
UBA1413 sp.FDU063	4684444	0.477	31142	99.28	2.419	0.668989	0.0887852	0.943681	0.103905	0.783219	0.0430373	1.83725	0.137592	1.74322	0.329069
UBA2214 sp.FDU064	3981693	0.601	5819	92.24	1.263	1.08635	0.0972455	0.870252	0.0366261	1.08078	0.0234694	0.20353	0.0413098	0.165437	0.0396806
UBA1398 sp.FDU065	5568587	0.715	30067	86.41	2.469	1.60513	0.118687	1.03798	0.0597481	0.986951	0.0574178	0.726004	0.0472142	0.347672	0.0230682
DTU019 sp.FDU066	2735173	0.495	8950	97.89	2.909	0	0	0.00329633	0.00466172	0.0714463	0.0242234	0.617657	0.318794	1.76589	0.814166
SR-FBR-E99 sp009881065 FDU067	2798703	0.497	18198	92.14	3.809	6.72945	0.590848	4.07634	0.110448	4.05097	1.22587	23.3057	8.59423	0.262552	0.166768
Methanobacteriaceae sp.FDU068	1489404	0.447	16894	87.33	0	14.7495	0.84343	19.2521	0.934588	18.4671	1.92664	35.2054	1.37803	43.0825	0.954166
UBA4975 sp.FDU069	2026782	0.571	24703	92.37	0	0.0160557	0.0122541	0	0	0	0	0.071123	0.0468233	3.10189	2.30932
DTGP01 sp.FDU070	4030491	0.599	28748	94.44	0.925	2.47856	0.209722	2.21526	0.351309	1.88716	0.548027	1.99596	0.176882	2.124	0.235506
JAAYUJ01 sp012517775 FDU071	4518581	0.542	12144	98.51	4.516	1.93665	0.331371	3.72537	0.163569	2.61444	0.129716	3.95122	0.745641	5.10819	0.249602
DUQX01 sp012520035 FDU072	2875275	0.452	25076	94.06	1.271	0.008685	0.00687811	0.150327	0.108306	0.53431	0.300257	1.87023	0.116538	2.49623	1.81439
DULO01 sp.FDU073	2003038	0.573	4783	73.59	1.822	0.395431	0.0392353	0.009046	0.012793	0.010392	0.00745314	1.69845	0.496741	0.204158	0.160945
JAAYDI01 sp.FDU074	6488348	0.658	8226	91.68	0	1.74295	0.0500017	1.18622	0.0937886	1.08556	0.0174114	1.28668	0.0559979	1.26892	0.0483339
UBA1433 sp.FDU075	2116674	0.36	61956	96.71	0.352	0.73618	0.0361521	0.659172	0.0513779	0.849776	0.0506101	1.38767	0.0883423	1.47036	0.255484
DTU022 sp.FDU076	1575479	0.56	3369	71.7	4.025	1.11521	0.0210772	1.33516	0.0830319	0.400341	0.0481572	0.0378087	0.0279244	0	0
RBG-16-64-13 sp.FDU077	2514618	0.645	11227	89.74	4.568	0.803697	0.0178522	1.06593	0.102816	1.19055	0.0813811	0.656496	0.0760175	0.628667	0.0522903
Ch109 sp.FDU079	2150798	0.492	7860	85.68	3.491	0.369975	0.0412257	0.137913	0.0100171	0.354092	0.0594291	0.908302	0.0907303	0.907637	0.111887
Propionicimonas sp.FDU080	2436950	0.721	3969	84.95	3.281	27.2712	0.603153	36.2758	2.03745	42.0904	8.56436	55.1113	3.93024	52.6179	5.84886
UBA2241 sp.FDU081	2894015	0.693	51508	96.12	1.58	6.64741	0.330647	3.92798	0.1559	4.51242	0.17807	8.74627	0.146929	9.88596	0.449232
Methanothrix soehngenii FDU082	2404120	0.522	10317	93.92	1.633	253.306	9.73724	302.464	8.55799	308.444	5.9757	260.961	11.6387	199.62	8.24721
Proteiniborus ethanoligenes FDU083	2581110	0.325	65886	97.88	0	0.26086	0.0845822	0.033232	0.00776223	0.009465	0.00190783	0.874718	0.119261	3.23882	0.419865
JAAYJV01 sp002070275 FDU084	2962042	0.527	3117	75.88	1.282	0	0	1.88177	0.368699	0	0	0	0	0	0
PWPN01 sp.FDU085	4239181	0.624	9797	74.44	1.203	1.23475	0.0244159	0.648733	0.0397498	0.614098	0.0618749	0.429648	0.0564717	0.625251	0.0258976
UBA5829 sp.FDU086	2292817	0.574	2865	75.95	4.197	0	0	0	0	0	0	1.79755	0.299729	0.0794763	0.0230116
Proteiniphilum sp.FDU087	2484891	0.513	33871	96.17	0.564	3.61621	0.572476	0.424911	0.0149509	0.411603	0.0235284	2.10167	0.184166	2.77604	0.222441
DTJY01 sp.FDU088	3669858	0.566	259499	95.37	1.851	0.009606	0.00432412	0.0110213	0.000668122	0.002255	9.2275e-05	6.58551	1.13159	0.0532927	0.0358371
SLSP01 sp.FDU089	4012704	0.624	37873	90.9	1.363	1.20315	0.0545783	2.23774	0.208027	1.92655	0.2299	0.179371	0.0127056	0.283008	0.0357884
RBG-16-64-13 sp.FDU090	2229369	0.582	38072	96.12	3.591	3.56096	0.0910262	2.91502	0.266559	3.51089	0.0927268	4.39726	0.3061	4.01197	0.405688
UBA4975 sp002427015 FDU091	2137162	0.517	5929	94.77	1.935	5.35526	0.881341	0.195611	0.0648968	0.0475827	0.018255	18.0125	1.2516	9.92583	3.19332
UBA1431 sp.FDU092	1456206	0.607	8421	82.42	2.089	0.957087	0.0208065	0.541492	0.00740139	0.42192	0.092066	0.587842	0.0308894	0.806298	0.0419839
UBA6140 sp.FDU093	1700289	0.533	5654	76.21	1.093	0.779958	0.0506108	0.358337	0.0445525	0.497951	0.0349477	0.530781	0.0535658	0.691968	0.0551391
UBA1383 sp002305415 FDU094	2981736	0.715	31922	97.5	1.111	2.63892	0.255486	2.18411	0.114383	1.77424	0.106244	1.61242	0.11208	1.15796	0.146937
DTJY01 sp.FDU095	2738010	0.592	10737	82.87	2.314	1.01582	0.338416	0.489608	0.0460043	0.490277	0.0877312	1.29886	0.597969	0.62161	0.365949
SZUA-584 sp.FDU096	2260775	0.445	47902	96.34	1.612	0.00244933	0.00189306	38.001	30.5458	0.020404	0.0274438	0.00385033	0.00114074	0.00315967	0.00108925
JAAYKM01 sp.FDU097	2949681	0.545	28904	96.77	4.884	2.43456	0.313878	0.647758	0.0623913	0.62108	0.040244	1.90164	0.482381	0.506647	0.0280934
UBA6794 sp.FDU098	1763996	0.374	9085	96.61	1.694	1.50611	0.174345	4.35625	0.113621	4.09938	0.125326	2.35943	0.159646	3.04796	0.208487
UBA5500 sp.FDU099	2268880	0.494	15629	89.83	0.564	4.21327	0.777587	0.299199	0.00877965	0.340021	0.053896	9.39404	0.625486	18.489	0.287642
DTU098 sp002305915 FDU100	2769132	0.499	30764	97.37	0.843	4.14262	3.38908	0.0513993	0.0236113	0.0329663	0.0215752	5.63077	0.732249	7.16898	0.833528
Hungateiclostridium sp.FDU101	2789877	0.386	3064	78.19	1.363	0	0	1.91786	0.502249	0	0	0	0	0	0
Petrimonas mucosa FDU102	2759311	0.495	49404	96.17	2.185	3.56935	0.273029	0.255084	0.0368929	0.043749	0.0105965	1.65555	0.340643	3.39287	0.224049
PWPN01 sp.FDU103	7726349	0.634	14637	93.75	3.409	2.47059	0.0560187	2.1191	0.176767	2.08389	0.0798163	1.8226	0.215649	2.01936	0.0909179
JAAYDC01 sp.FDU104	2665052	0.57	30555	86.54	2.752	0.831354	0.0292454	1.01582	0.0462847	1.10057	0.193304	0.5531	0.0297631	0.451406	0.086678
SR-FBR-E99 sp.FDU105	3210306	0.505	32895	78.55	0	2.01063	0.0360569	1.8177	0.130032	2.04899	0.106153	1.3652	0.1041	1.59706	0.175288
Methanobacterium sp.FDU106	1767802	0.382	18461	91.2	0.8	23.9568	1.41826	12.4479	0.409821	12.6913	2.51024	35.8876	3.86863	55.2747	3.53636
MVYY01 sp.FDU107	2054378	0.328	9180	97.2	4.301	3.41796	0.206866	0.764663	0.0968313	1.20183	0.203491	2.1521	1.65936	0	0
Methanoregula sp.FDU108	2599425	0.577	11921	90.19	1.96	1.72871	0.0455802	1.06613	0.134273	1.3951	0.0154891	1.13005	0.112419	1.34952	0.10118
DTIW01 sp.FDU109	4486194	0.615	11787	77.02	1.851	0.356475	0.0688291	1.1651	0.159296	1.23946	0.136646	0.110257	0.0117985	0.066673	0.00604102
QAXR01 sp003053505 FDU110	3540877	0.575	33714	89.03	1.612	0.92706	0.0336195	1.24575	0.048272	1.59219	0.0764422	0.806522	0.0399428	2.46213	0.134067
UBA5499 sp002426275 FDU111	2721149	0.526	18799	89.19	2.401	0	0	0.138721	0.0182858	0.0757527	0.0131979	2.85627	1.2536	0.0459753	0.0204875
JABLXU01 sp013177805 FDU112	5660368	0.565	46181	100	3.37	1.07268	0.0409007	1.30098	0.0341476	0.998123	0.184647	3.49717	0.393773	1.7197	0.021053
UBA1398 sp002305165 FDU113	4080354	0.667	29577	92.59	1.388	2.14496	0.187099	2.29338	0.365407	1.27115	0.235198	4.46521	0.250998	3.55679	1.13754
JACIYD01 sp.FDU114	2296636	0.524	5462	90.65	4.325	0	0	16.3123	5.74444	15.3133	1.23806	0.0702537	0.0993537	0	0
Proteiniphilum saccharofermentans FDU115	2827254	0.445	11256	83.4	2.459	0.84378	0.0626312	0.0163523	0.00185715	0	0	0.653631	0.152932	1.82447	0.124952
Bellilinea sp.FDU116	3273461	0.524	21541	91.81	4.727	5.3486	1.425	1.79119	0.141925	5.79001	0.840846	4.49786	1.46445	0.298509	0.21389
49-20 sp012517865 FDU117	2481022	0.553	40953	90.9	4.727	5.81063	0.512095	5.41945	0.257316	5.09339	0.822988	4.87252	0.441903	3.0189	0.396341
D2 sp.FDU118	2224219	0.491	19408	86.63	1.98	3.34541	0.26804	0.615105	0.0495023	0.496731	0.0954391	2.47849	0.287895	2.21539	0.20489
Sedimentibacter sp003483345 FDU119	2468545	0.345	28045	98.89	4.895	0.064603	0.0298357	0.0500527	0.0243666	1.2092	0.166634	2.28708	0.0559508	3.76738	0.76497
UBA8904 sp002070455 FDU120	2064536	0.492	3903	70.11	4.354	0.751441	0.0271885	0.396381	0.0408926	0.502588	0.0472287	0.555757	0.0251584	0.785102	0.0145661
Aminivibrio sp.FDU121	2552499	0.552	6018	79.6	4.006	0.37481	0.0373803	0.629445	0.0601405	0.576096	0.0390516	0.548195	0.0364668	0.630386	0.0972089
DSUL01 sp.FDU122	3451789	0.646	12263	91.18	3.086	0.671861	0.0220351	0.489088	0.0710538	0.529237	0.0206139	0.81601	0.095498	1.02249	0.153187
SR-FBR-E99 sp.FDU123	3375822	0.497	17182	91.08	4.19	8.50061	0.0560886	5.48564	0.576293	6.2295	0.242708	6.38084	0.431074	7.41883	0.846541
UBA2219 sp.FDU124	2533791	0.674	34842	90.75	1.848	1.40185	0.0534449	0.601067	0.0619374	0.783697	0.0543723	1.30402	0.0945055	1.86316	0.0810735
DTJY01 sp.FDU125	2952732	0.597	12643	85.64	1.851	0.221719	0.0386709	0.067333	0.0194209	0	0	0.466772	0.12791	2.1648	0.913489
JAAYAV01 sp.FDU126	3592358	0.673	21343	97.72	2.727	0.864693	0.027126	0.628267	0.0360181	0.621503	0.0728811	1.39583	0.0480494	1.743	0.0916332
UBA5069 sp.FDU127	5189794	0.67	14434	94.54	4.393	1.86306	0.0517285	1.97043	0.0675753	1.77618	0.236533	1.19692	0.140781	0.90542	0.142749
Proteiniphilum sp002410345 FDU128	2417668	0.415	15113	87.28	4.918	0.316564	0.0586133	0.0161133	0.0064476	0.0151825	0.00525875	0.353359	0.0972981	2.00489	0.105703
LD21 sp012517605 FDU129	3019399	0.434	42878	96.66	2.952	1.74352	0.0633561	1.22123	0.165447	1.59139	0.120783	1.57216	0.0764422	1.85829	0.24471
Sphaerochaeta sp012514185 FDU130	2560311	0.523	6579	92.04	1.136	1.38094	0.100281	0.236914	0.0253278	0.313965	0.0217191	0.476714	0.115902	0.878909	0.121314
PALSA-986 sp012513715 FDU131	1797208	0.375	11937	96.18	4.672	12.4169	1.12372	6.51519	1.15067	7.66165	0.370312	5.25747	0.422534	4.48934	0.509521
UBA4789 sp.FDU132	3122646	0.492	25468	98.1	2.795	0	0	0.0928997	0.0294778	7.33783	3.48471	0.0201867	0.0233862	0	0
UBA8346 sp.FDU133	4638910	0.452	49285	95.05	3.248	0	0	5.88059	4.63525	0.002755	0.00389616	0	0	0	0
UBA5389 sp.FDU134	1896465	0.599	5021	80.57	4.816	21.0913	3.5911	13.8552	2.32954	14.5323	1.57608	17.7772	1.1314	7.7813	4.16828
DTU008 sp001512965 FDU135	1810525	0.589	40962	100	0.268	0.00830633	0.00108226	0	0	0	0	0.677253	0.0132036	3.20261	0.334953
Advenella sp012923605 FDU136	2297579	0.502	9435	94.47	1.074	0.0189157	0.0190635	0.224093	0.0977682	0.011111	0.00881131	24.8654	8.00455	5.80452	0.493881
UBA6126 sp.FDU137	2100106	0.394	5271	90.74	0	0.12451	0.0607424	1.07004	0.142757	2.13851	0.279182	0.009408	0.0133049	0.0703667	0.0390235
DUVQ01 sp.FDU138	4329948	0.723	91189	84.87	1.774	0.00744133	0.000687771	0.007435	0.00203403	0.0349677	0.0132201	8.15156	6.58681	0.006441	0.000412753
JAAXZI01 sp.FDU139	6496106	0.622	15695	94.31	4.132	1.45376	0.00932292	1.20038	0.103262	0.715789	0.0859225	0.773357	0.106009	1.14617	0.116661
BRH-c25 sp.FDU140	2325060	0.425	3256	86.13	3.702	0.473943	0.0493255	0	0	1.91637	0.146685	0.0977043	0.0456047	0.077386	0.0562805
MVZN01 sp.FDU141	4301241	0.591	21990	95.59	2.313	0.66408	0.109084	1.67538	0.082658	1.98173	0.128318	4.0933	0.683228	4.1268	0.23223
DTGP01 sp.FDU142	3706981	0.674	17246	95.83	0	0	0	0	0	0	0	0.986687	0.10871	2.00565	0.48259
UBA4975 sp.FDU143	2119793	0.555	42900	94.27	0.211	2.13666	1.56782	0.000822667	0.000619801	0.00136833	0.00110218	0.569546	0.17228	6.4817	4.85358
UBA2279 sp.FDU144	1823206	0.661	31327	97.08	1.666	0.00789	0.00162731	3.46521	0.677779	2.07246	0.441102	0.0945937	0.0168964	0.034092	0.00347826
UBA5420 sp012837925 FDU145	2340237	0.498	14805	90.54	1.709	0	0	0	0	0	0	0.176421	0.107152	2.47262	1.82358
UBA2272 sp.FDU146	2043366	0.682	12490	90.41	3.194	0.0249045	0.00710933	0.132887	0.0455743	0.188609	0.0674365	0.368536	0.0773576	4.25981	1.00279
SLSP01 sp.FDU147	5788690	0.637	18869	92.42	2.575	0.177421	0.0390509	2.08606	0.118892	0.736183	0.128494	0.363197	0.0314614	0.0102257	0.000998436
UBA4996 sp002396805 FDU148	2446532	0.463	18339	95.97	1.624	0.0224172	5.50399e-05	0	0	0	0	0.920759	0.285094	1.66294	0.215483
UBA2256 sp001603165 FDU149	2659527	0.569	38343	97.7	0	2.12293	0.555447	2.33323	0.170604	2.12801	0.200382	0.721539	0.209027	0.147729	0.00616859
Cloacimonadaceae sp.FDU150	2024359	0.553	5156	72.05	2.747	1.32414	0.0692956	0.575851	0.0158086	0.691039	0.0482582	0.43082	0.0548847	0.552557	0.068666
SZUA-584 sp.FDU151	2144542	0.551	6510	77.43	3.655	0.675218	0.0193321	0.664086	0.0337458	0.758469	0.0445878	0.663051	0.0513886	0.595324	0.0512029
UBA6103 sp.FDU152	2214556	0.674	9975	80.09	0.862	0.813472	0.0214236	0.592532	0.0666611	0.722181	0.128414	0.713987	0.0653702	0.839039	0.00880231
DTKZ01 sp.FDU153	3137845	0.624	11360	89.01	0.4	0.865524	0.0341324	0.479832	0.0461482	0.4294	0.0687044	0.714816	0.0536197	0.984941	0.0845116
58-81 sp.FDU154	1564745	0.587	7657	88.44	4.391	0.274139	0.00448802	0.781169	0.0996886	0.802308	0.0578972	0.712335	0.0216115	0.70006	0.0266784
PALSA-986 sp.FDU155	1938750	0.38	5215	94.08	3.738	8.9504	0.411114	5.81095	0.650811	7.1223	0.735847	10.1979	0.254257	11.7458	1.99739
Thermoguttaceae sp.FDU156	8848293	0.639	62656	96.55	0	20.0938	0.904642	14.7555	1.4153	11.2473	1.23837	13.6935	0.200454	17.2592	1.34662
JAAYXZ01 sp012515635 FDU157	1175088	0.403	56039	92.14	0.097	0.745809	0.0428344	1.03299	0.0798597	1.45354	0.173955	0.962792	0.165008	1.08132	0.0776813
JACCES01 sp.FDU158	1978333	0.639	2891	70.94	1.421	0.610185	0.0504927	0.555234	0.094772	0.994905	0.356675	0.41137	0.0514929	0.403634	0.0906311
GCA-2748055 sp.FDU159	3360218	0.354	48203	96.19	0.714	0.897551	0.561456	1.7162	0.0758941	0.995813	0.26395	0.486826	0.044034	0	0
58-81 sp002070395 FDU160	1837133	0.599	101683	100	1.694	2.88526	0.287596	2.72801	0.24969	1.77337	0.266556	15.0576	0.226911	11.362	1.56202
RBG-16-64-13 sp.FDU161	2645636	0.663	14540	93.16	4.31	12.9721	0.324317	9.66114	0.602631	11.2368	0.835839	14.7471	0.666217	15.9185	0.964372
PHAA01 sp.FDU162	2334522	0.514	28285	93.83	1.875	1.60148	0.0299162	0.931302	0.085336	0.989752	0.114451	1.52149	0.733282	3.61174	0.784972
Syntrophus aciditrophicus FDU163	2412193	0.517	9665	91.54	4.838	179.684	29.944	56.2272	13.5471	94.2944	22.5861	7.40793	4.65974	0	0
UBA5209 sp.FDU164	704787	0.343	184113	80.72	0	3.91026	1.46429	1.25535	0.0029364	2.65467	0.339891	0.029033	0.0176905	0.00263933	0.000819896
Firm-13 sp.FDU165	2064719	0.55	5381	78.63	0.709	0.528441	0.0395186	0.63471	0.0749601	0.592068	0.0570635	0.593293	0.0962306	0.391419	0.0525394
Tissierella sp.FDU166	2687750	0.312	18455	89.79	1.864	0.00761833	0.00143348	0.0522487	0.00965957	0.0261643	0.0191148	1.29705	0.0917637	1.56395	0.137747
Actinotalea sp.FDU167	3418155	0.743	29406	96.47	3.082	0.713048	0.021415	0.681282	0.0552266	0.547273	0.0836547	1.34897	0.085607	2.17226	0.149495
Mesotoga infera_B FDU168	2650030	0.486	18979	93.15	1.332	6.66599	1.2901	10.4596	1.60437	9.80534	0.131066	7.62089	0.538147	2.42915	0.847174
RBG-16-64-13 sp.FDU169	2681982	0.656	11702	83.46	4.261	0.430438	0.00787926	1.50223	0.0895318	1.41954	0.111204	0.331939	0.0377972	0.109088	0.0264203
Aminobacterium colombiense FDU170	2172739	0.447	26672	96.61	0.154	1.26813	0.0780903	0.27642	0.00628749	0.278409	0.00503755	0.914593	0.0123804	1.10739	0.0556027
UBA5072 sp.FDU171	4055449	0.455	15569	89.21	4.396	6.16882	0.024293	2.30797	0.234751	2.58006	0.312433	5.15915	0.33079	5.01091	0.636229
Bact-08 sp.FDU172	2218208	0.403	53958	96.66	1.904	0.00124133	0.00175551	0.00254367	0.00103902	0.0425457	0.0289427	2.86792	0.529489	5.04118	1.1183
Methanofastidiosum sp001587595 FDU173	1403833	0.336	14960	90.26	3.96	1.04747	0.14515	0.605185	0.025602	0.363059	0.0260151	1.74173	0.0986753	0.063938	0.00402605
JAAZJW01 sp012519835 FDU174	1834848	0.386	26057	90.78	1.418	5.10979	0.930727	0	0	0	0	4.96961	0.543351	5.10834	0.290734
KH17 sp.FDU175	1995597	0.684	31185	86.25	0.833	1.63748	0.0250113	1.19155	0.070596	0.848733	0.065148	5.32352	0.381185	2.77662	0.104778
Spiro-10 sp004294945 FDU176	2982800	0.525	6443	95	1.981	0.841015	0.0599891	0.1806	0.0981701	0.504792	0.0540196	1.5256	0.956314	0	0
UBA11386 sp.FDU177	7473847	0.672	7271	72.57	1.149	0.768355	0.0307177	1.41113	0.117818	1.10506	0.105878	0.361515	0.021601	0.47354	0.0262569
UBA4923 sp012511175 FDU178	1716606	0.549	95536	88.29	0	1.33592	0.173783	1.78395	0.101338	2.38802	0.329594	1.67893	0.0625646	0.12091	0.0155575
Delta-02 sp002408185 FDU179	3152763	0.515	40718	92.9	3.225	0	0	3.59939	0.485904	1.72712	0.74355	0.0659533	0.0507756	0	0
Methanolinea sp.FDU180	1363951	0.58	30152	80.93	2.037	2.39353	0.131618	1.26116	0.0871343	1.48173	0.0874574	1.95882	0.138094	2.26695	0.177982
UBA8910 sp002069605 FDU181	2176271	0.388	12657	100	0	3.32316	0.185939	2.41105	0.0963342	1.93572	0.20794	4.06659	0.356001	4.72385	0.15189
Fen-1087 sp.FDU182	2721803	0.59	43878	90.32	4.322	0.980851	0.0611892	4.432	0.217573	1.77061	0.0666595	0.350082	0.0166326	0.40723	0.0114316
JAAYEA01 sp012689325 FDU183	4654948	0.669	6035	87.51	3.771	0.281351	0.0245874	1.14926	0.0919709	1.44696	0.0739847	0.0495527	0.00881692	0.020453	0.00520594
Desulfotomaculaceae_A sp.FDU184	2404106	0.474	11108	94.12	1.932	0.0443553	0.0274361	0	0	0	0	0.768281	0.233413	1.80117	0.134715
Fen-1166 sp.FDU185	2484655	0.481	14729	81.39	4.838	1.19891	0.0142459	1.31212	0.101108	1.37359	0.141225	0.770588	0.158668	1.03118	0.132716
UBA2268 sp.FDU186	2548029	0.394	12915	96.74	0.546	0	0	0.120939	0.0403721	0.017208	0.0138417	0.51321	0.0293991	1.90248	0.173237
UBA288 sp.FDU187	2036451	0.662	22829	99.01	3.618	1.39094	0.040437	1.39711	0.0405714	1.19031	0.232179	1.50992	0.127156	1.68454	0.0675355
Methanosarcina mazei FDU188	3350695	0.42	8743	98.52	2.614	7.83039	2.23871	0	0	0.0052725	0.00745644	0.00558	0.00789131	0.0190083	0.017265
JAAXZI01 sp012719955 FDU189	5337768	0.635	68097	95.45	2.272	0.012106	0.000108003	0.0114857	0.00155404	0.00921067	0.0017688	7.39288	0.479374	0.0171757	0.000579286
B3-TA06 sp.FDU190	2482163	0.52	12838	89.36	1.098	0.702998	0.0374473	0.427696	0.0605556	0.652585	0.02423	0.597006	0.0365348	0.715652	0.0282722
Mesotoga sp002305955 FDU191	2565710	0.506	16371	97.25	2.586	4.39885	0.214455	12.178	1.71688	9.89754	0.367758	30.2833	1.01428	22.7456	6.10631
B3-TA06 sp012517375 FDU192	2506266	0.488	22127	94.94	1.123	2.36825	0.0461357	0.672891	0.0844805	0.727762	0.137704	2.1262	0.104859	2.72162	0.264103
UBA4175 sp002379855 FDU193	2258231	0.525	102596	95.6	3.296	0.103867	0.0576403	0.0154837	0.000989956	0.0142007	0.000671524	49.6912	4.0903	36.9621	9.27799
UBA4971 sp012512055 FDU194	2335764	0.508	14653	87.21	4.104	5.44621	0.657969	0.529323	0.0422975	0.384005	0.0340619	0.6697	0.0681216	0.357476	0.0581291
Syntrophobacter fumaroxidans FDU195	4645064	0.6	86259	99.19	3.387	7.23122	0.576775	6.05657	0.154145	7.13999	0.159498	6.53134	0.464165	10.5753	0.759093
DTU059 sp.FDU196	3250875	0.43	32388	97.08	0.699	0.003468	0.00245366	3.24903	2.74885	0.001695	0.00239709	0	0	0	0
Thauera sp.FDU197	3594669	0.695	92791	100	0	0.101271	0.0448594	0.163975	0.0921972	0.0771123	0.0215793	27.606	14.647	0.120649	0.0444502
JAAYBG01 sp012718985 FDU198	1701679	0.331	7346	90.54	0	1.59334	0.522945	0.797048	0.0906961	1.31084	0.177559	0.004306	0.0060896	0	0
Bryobacteraceae sp.FDU199	5126155	0.663	4232	86.4	0.974	0.554107	0.0727308	0.16151	0.0336546	0.076816	0.023342	0.787835	0.241807	1.01888	0.187238
UBA5352 sp.FDU200	6127341	0.688	19377	95.26	1.851	0.140404	0.0025601	3.25114	0.319259	4.22626	0.074741	3.24184	1.0292	3.5877	0.475679
UBA1419 sp002305585 FDU201	1009181	0.532	3975	72.52	1.652	0.366503	0.0125734	0.236611	0.0167696	0.285374	0.044581	0.695837	0.109542	0.709339	0.0508696
UBA2241 sp.FDU202	1972739	0.68	15409	84.91	2.011	2.76653	0.0988721	1.72449	0.0364948	2.09009	0.0254407	4.67409	0.203165	4.82261	0.257872
Lysinibacillus_B sp.FDU203	3252770	0.423	2955	81.28	1.627	1.22824	0.308155	0.885868	0.0614529	0.203285	0.0660805	0.162776	0.0629797	0.15531	0.0608766
JAAYIR01 sp.FDU204	3523379	0.678	5053	84.43	4.012	1.13775	0.151592	0.618892	0.0750839	0.57672	0.00616353	0.606743	0.0265257	0.174192	0.130907
Fen-1342 sp.FDU205	5288816	0.674	15022	92.79	4.545	0.539165	0.0241493	0.273385	0.0222653	0.141328	0.0282044	1.45041	0.188901	1.76773	0.163638
Bact-08 sp009929175 FDU206	1688034	0.452	2934	76.15	4.947	0.435478	0.0617508	0	0	0	0	0.747088	0.120552	0.996508	0.207562
Proteiniclasticum sp003514505 FDU207	2209667	0.445	2783	71.21	2.584	0.236122	0.0393034	0.376024	0.0313746	0.539168	0.105887	0.447285	0.0661581	0.593154	0.049691
UBA4810 sp002418825 FDU208	2011216	0.454	3572	78.14	4.802	0	0	1.23016	0.0903977	1.19027	0.116883	0	0	0	0
