# Supplementary material
Source: MDPI journal article supplement (https://www.mdpi.com/2311-5637/9/4/387)
Supplement: s1 [file s1 › table S4.xlsx]

## Sheet: Sheet1
Table S4 Taxonomic classification of the GBs
GB	Phylum	Classification	fastani_ani	fastani_af
UBA4975 sp012727415 FDU001	Firmicutes	d__Bacteria;p__Firmicutes_D;c__Proteinivoracia;o__UBA4975;f__UBA4975;g__UBA4975;s__UBA4975 sp012727415	97.93	0.94
JAAYED01 sp.FDU002	Chloroflexota	d__Bacteria;p__Chloroflexota;c__Anaerolineae;o__UBA1429;f__UBA1429;g__JAAYED01;s__	N/A	N/A
UBA5829 sp.FDU003	Armatimonadota	d__Bacteria;p__Armatimonadota;c__UBA5829;o__UBA5829;f__;g__;s__	N/A	N/A
T3SED10-260 sp.FDU004	Caldisericota	d__Bacteria;p__Caldisericota;c__Caldisericia;o__UBA6126;f__UBA6126;g__T3SED10-260;s__	N/A	N/A
JACIYB01 sp.FDU005	Firmicutes	d__Bacteria;p__Firmicutes_B;c__Syntrophomonadia;o__Syntrophomonadales;f__Syntrophomonadaceae;g__JACIYB01;s__	N/A	N/A
UBA8901 sp.FDU006	Edwardsbacteria	d__Bacteria;p__Edwardsbacteria;c__AC1;o__AC1;f__UBA8901;g__UBA8901;s__	N/A	N/A
Ch29 sp.FDU007	Firmicutes	d__Bacteria;p__Firmicutes_A;c__Ch29;o__Ch29;f__Ch29;g__;s__	N/A	N/A
Propionicimonas sp.FDU008	Actinobacteriota	d__Bacteria;p__Actinobacteriota;c__Actinomycetia;o__Propionibacteriales;f__Propionibacteriaceae;g__Propionicimonas;s__	N/A	N/A
RBG-16-66-30 sp.FDU009	Acidobacteriota	d__Bacteria;p__Acidobacteriota;c__Aminicenantia;o__Aminicenantales;f__RBG-16-66-30;g__RBG-16-66-30;s__	N/A	N/A
DTU080 sp.FDU010	Firmicutes	d__Bacteria;p__Firmicutes_G;c__Limnochordia;o__DTU080;f__DTU080;g__;s__	N/A	N/A
UBA6794 sp.FDU011	Caldatribacteriota	d__Bacteria;p__Caldatribacteriota;c__JS1;o__SB-45;f__UBA6794;g__UBA6794;s__	N/A	N/A
UBA5829 sp.FDU012	Armatimonadota	d__Bacteria;p__Armatimonadota;c__UBA5829;o__UBA5829;f__UBA5829;g__;s__	N/A	N/A
Syntrophobacterales sp.FDU013	Desulfobacterota	d__Bacteria;p__Desulfobacterota;c__Syntrophobacteria;o__Syntrophobacterales;f__;g__;s__	N/A	N/A
JABUFB01 sp.FDU014	Armatimonadota	d__Bacteria;p__Armatimonadota;c__UBA5377;o__UBA5377;f__JABUFB01;g__;s__	N/A	N/A
DUNV01 sp.FDU015	Firmicutes	d__Bacteria;p__Firmicutes_D;c__Dethiobacteria;o__DTU022;f__UBA8154;g__DUNV01;s__	N/A	N/A
JAAYBY01 sp.FDU016	Firmicutes	d__Bacteria;p__Firmicutes_A;c__Clostridia;o__Saccharofermentanales;f__UBA5734;g__JAAYBY01;s__	N/A	N/A
JAAYIR01 sp012523355 FDU017	Armatimonadota	d__Bacteria;p__Armatimonadota;c__UBA5377;o__UBA5377;f__JAAYIR01;g__JAAYIR01;s__JAAYIR01 sp012523355	98.79	0.86
Fermentibacter sp.FDU018	Fermentibacterota	d__Bacteria;p__Fermentibacterota;c__Fermentibacteria;o__Fermentibacterales;f__Fermentibacteraceae;g__Fermentibacter;s__	N/A	N/A
JABLXH01 sp.FDU019	Armatimonadota	d__Bacteria;p__Armatimonadota;c__UBA5377;o__UBA5377;f__JABLXH01;g__;s__	N/A	N/A
58-81 sp012729145 FDU020	Synergistota	d__Bacteria;p__Synergistota;c__Synergistia;o__Synergistales;f__Thermovirgaceae;g__58-81;s__58-81 sp012729145	99.76	0.96
Brooklawnia sp012517405 FDU021	Actinobacteriota	d__Bacteria;p__Actinobacteriota;c__Actinomycetia;o__Propionibacteriales;f__Propionibacteriaceae;g__Brooklawnia;s__Brooklawnia sp012517405	99.11	0.93
Mariniphaga sp.FDU022	Bacteroidota	d__Bacteria;p__Bacteroidota;c__Bacteroidia;o__Bacteroidales;f__Prolixibacteraceae;g__Mariniphaga;s__	N/A	N/A
JAAYUK01 sp012517735 FDU023	Nitrospirota	d__Bacteria;p__Nitrospirota;c__Thermodesulfovibrionia;o__Thermodesulfovibrionales;f__UBA9935;g__JAAYUK01;s__JAAYUK01 sp012517735	99.07	0.92
MWBF01 sp.FDU024	Chloroflexota	d__Bacteria;p__Chloroflexota;c__Anaerolineae;o__CG2-30-64-16;f__CG2-30-64-16;g__MWBF01;s__	N/A	N/A
Cloacimonas sp002432865 FDU025	Cloacimonadota	d__Bacteria;p__Cloacimonadota;c__Cloacimonadia;o__Cloacimonadales;f__Cloacimonadaceae;g__Cloacimonas;s__Cloacimonas sp002432865	99.62	0.94
UBA5420 sp.FDU026	Firmicutes	d__Bacteria;p__Firmicutes_G;c__Limnochordia;o__DTU010;f__DTU010;g__UBA5420;s__	N/A	N/A
Pirellulales sp.FDU027	Planctomycetota	d__Bacteria;p__Planctomycetota;c__Planctomycetes;o__Pirellulales;f__;g__;s__	N/A	N/A
JAAZMI01 sp.FDU028	Firmicutes	d__Bacteria;p__Firmicutes_D;c__Dethiobacteria;o__DTU022;f__UBA8154;g__JAAZMI01;s__	N/A	N/A
DTU010 sp.FDU029	Firmicutes	d__Bacteria;p__Firmicutes_G;c__Limnochordia;o__DTU010;f__DTU010;g__;s__	N/A	N/A
Aminivibrio sp009929115 FDU030	Synergistota	d__Bacteria;p__Synergistota;c__Synergistia;o__Synergistales;f__Aminobacteriaceae;g__Aminivibrio;s__Aminivibrio sp009929115	97.09	0.79
Methanothrix_A sp001602645 FDU031	Halobacteriota	d__Archaea;p__Halobacteriota;c__Methanosarcinia;o__Methanotrichales;f__Methanotrichaceae;g__Methanothrix_A;s__Methanothrix_A sp001602645	99.32	0.91
MVQK01 sp.FDU032	Firmicutes	d__Bacteria;p__Firmicutes_B;c__Desulfotomaculia;o__Desulfotomaculales;f__Pelotomaculaceae;g__MVQK01;s__	N/A	N/A
LD21 sp.FDU033	Bacteroidota	d__Bacteria;p__Bacteroidota;c__Bacteroidia;o__Bacteroidales;f__VadinHA17;g__LD21;s__	N/A	N/A
DSM-8532 sp.FDU034	Firmicutes	d__Bacteria;p__Firmicutes_A;c__Clostridia;o__Acetivibrionales;f__DSM-8532;g__;s__	N/A	N/A
UBA1398 sp.FDU035	Armatimonadota	d__Bacteria;p__Armatimonadota;c__UBA5377;o__UBA1398;f__UBA1398;g__;s__	N/A	N/A
DTU024 sp.FDU036	Firmicutes	d__Bacteria;p__Firmicutes_A;c__Clostridia_A;o__Christensenellales;f__CAG-74;g__DTU024;s__	N/A	N/A
UBA4179 sp002849245 FDU037	Bacteroidota	d__Bacteria;p__Bacteroidota;c__Bacteroidia;o__Bacteroidales;f__Dysgonomonadaceae;g__UBA4179;s__UBA4179 sp002849245	95.48	0.87
Syntrophosphaera sp012516855 FDU038	Cloacimonadota	d__Bacteria;p__Cloacimonadota;c__Cloacimonadia;o__Cloacimonadales;f__Cloacimonadaceae;g__Syntrophosphaera;s__Syntrophosphaera sp012516855	98.14	0.9
DUOT01 sp.FDU039	Firmicutes	d__Bacteria;p__Firmicutes;c__Bacilli;o__ML615J-28;f__CAG-698;g__DUOT01;s__	N/A	N/A
Desulfovibrionaceae sp.FDU040	Desulfobacterota	d__Bacteria;p__Desulfobacterota;c__Desulfovibrionia;o__Desulfovibrionales;f__Desulfovibrionaceae;g__;s__	N/A	N/A
UBA2224 sp012719295 FDU041	Hydrogenedentota	d__Bacteria;p__Hydrogenedentota;c__Hydrogenedentia;o__Hydrogenedentiales;f__SLHB01;g__UBA2224;s__UBA2224 sp012719295	99.56	0.94
Cloacimonadaceae sp.FDU042	Cloacimonadota	d__Bacteria;p__Cloacimonadota;c__Cloacimonadia;o__Cloacimonadales;f__Cloacimonadaceae;g__;s__	N/A	N/A
UBA1383 sp002304945 FDU043	Actinobacteriota	d__Bacteria;p__Actinobacteriota;c__Actinomycetia;o__Actinomycetales;f__Actinomycetaceae;g__UBA1383;s__UBA1383 sp002304945	98.57	0.88
Bact-08 sp001897515 FDU044	Bacteroidota	d__Bacteria;p__Bacteroidota;c__Bacteroidia;o__Bacteroidales;f__UBA932;g__Bact-08;s__Bact-08 sp001897515	99.37	0.99
UBA8910 sp012517485 FDU045	Caldatribacteriota	d__Bacteria;p__Caldatribacteriota;c__Caldatribacteriia;o__Caldatribacteriales;f__UBA8910;g__UBA8910;s__UBA8910 sp012517485	98.02	0.74
UBA2199 sp.FDU046	Acidobacteriota	d__Bacteria;p__Acidobacteriota;c__Aminicenantia;o__UBA2199;f__UBA2199;g__UBA2199;s__	N/A	N/A
Syner-03 sp002316795 FDU047	Synergistota	d__Bacteria;p__Synergistota;c__Synergistia;o__Synergistales;f__Synergistaceae;g__Syner-03;s__Syner-03 sp002316795	99.45	0.9
DSUL01 sp.FDU048	Armatimonadota	d__Bacteria;p__Armatimonadota;c__UBA5829;o__DSUL01;f__DSUL01;g__DSUL01;s__	N/A	N/A
JAAYKS01 sp.FDU049	Firmicutes	d__Bacteria;p__Firmicutes_A;c__Clostridia;o__Saccharofermentanales;f__UBA5734;g__JAAYKS01;s__	N/A	N/A
UBA5266 sp002411545 FDU050	Bacteroidota	d__Bacteria;p__Bacteroidota;c__Bacteroidia;o__Bacteroidales;f__WCHB1-69;g__UBA5266;s__UBA5266 sp002411545	99.29	0.89
UBA5829 sp.FDU051	Armatimonadota	d__Bacteria;p__Armatimonadota;c__UBA5829;o__UBA5829;f__UBA5829;g__;s__	N/A	N/A
JAAYIG01 sp012523595 FDU053	Fibrobacterota	d__Bacteria;p__Fibrobacterota;c__Chitinivibrionia;o__Chitinivibrionales;f__Chitinispirillaceae;g__JAAYIG01;s__JAAYIG01 sp012523595	95.06	0.86
Methanolinea sp002067485 FDU054	Halobacteriota	d__Archaea;p__Halobacteriota;c__Methanomicrobia;o__Methanomicrobiales;f__Methanoregulaceae;g__Methanolinea;s__Methanolinea sp002067485	99	0.74
DUVQ01 sp.FDU055	Myxococcota	d__Bacteria;p__Myxococcota;c__UBA9042;o__DTJE01;f__DTJE01;g__DUVQ01;s__	N/A	N/A
UBA1032 sp.FDU056	Cloacimonadota	d__Bacteria;p__Cloacimonadota;c__Cloacimonadia;o__Cloacimonadales;f__Cloacimonadaceae;g__UBA1032;s__	N/A	N/A
MVQL01 sp.FDU057	Firmicutes	d__Bacteria;p__Firmicutes_B;c__Desulfotomaculia;o__Desulfotomaculales;f__Pelotomaculaceae;g__MVQL01;s__	N/A	N/A
Acetoanaerobium noterae FDU058	Firmicutes	d__Bacteria;p__Firmicutes_A;c__Clostridia;o__Peptostreptococcales;f__Filifactoraceae;g__Acetoanaerobium;s__Acetoanaerobium noterae	97.69	0.97
JAAYCB01 sp.FDU059	Planctomycetota	d__Bacteria;p__Planctomycetota;c__Planctomycetes;o__Pirellulales;f__Thermoguttaceae;g__JAAYCB01;s__	N/A	N/A
Petrimonas sp002356435 FDU060	Bacteroidota	d__Bacteria;p__Bacteroidota;c__Bacteroidia;o__Bacteroidales;f__Dysgonomonadaceae;g__Petrimonas;s__Petrimonas sp002356435	99.26	0.96
Fen-1364 sp.FDU061	Spirochaetota	d__Bacteria;p__Spirochaetota;c__Spirochaetia;o__SZUA-6;f__Fen-1364;g__;s__	N/A	N/A
Syntrophorhabdus sp.FDU062	Desulfobacterota	d__Bacteria;p__Desulfobacterota_G;c__Syntrophorhabdia;o__Syntrophorhabdales;f__Syntrophorhabdaceae;g__Syntrophorhabdus;s__	N/A	N/A
UBA1413 sp.FDU063	Bacteroidota	d__Bacteria;p__Bacteroidota;c__Bacteroidia;o__Bacteroidales;f__Prolixibacteraceae;g__UBA1413;s__	N/A	N/A
UBA2214 sp.FDU064	KSB1	d__Bacteria;p__KSB1;c__UBA2214;o__UBA2214;f__UBA2214;g__UBA2214;s__	N/A	N/A
UBA1398 sp.FDU065	Armatimonadota	d__Bacteria;p__Armatimonadota;c__UBA5377;o__UBA1398;f__UBA1398;g__;s__	N/A	N/A
DTU019 sp.FDU066	Firmicutes	d__Bacteria;p__Firmicutes_B;c__Syntrophomonadia;o__Syntrophomonadales;f__Syntrophomonadaceae;g__DTU019;s__	N/A	N/A
SR-FBR-E99 sp009881065 FDU067	Bacteroidota	d__Bacteria;p__Bacteroidota;c__Bacteroidia;o__Bacteroidales;f__VadinHA17;g__SR-FBR-E99;s__SR-FBR-E99 sp009881065	99.12	0.86
Methanobacteriaceae sp.FDU068	Methanobacteriota	d__Archaea;p__Methanobacteriota;c__Methanobacteria;o__Methanobacteriales;f__Methanobacteriaceae;g__;s__	N/A	N/A
UBA4975 sp.FDU069	Firmicutes	d__Bacteria;p__Firmicutes_D;c__Proteinivoracia;o__UBA4975;f__UBA4975;g__;s__	N/A	N/A
DTGP01 sp.FDU070	Armatimonadota	d__Bacteria;p__Armatimonadota;c__DTGP01;o__DTGP01;f__;g__;s__	N/A	N/A
JAAYUJ01 sp012517775 FDU071	Desulfobacterota	d__Bacteria;p__Desulfobacterota;c__Syntrophobacteria;o__Syntrophobacterales;f__Syntrophobacteraceae;g__JAAYUJ01;s__JAAYUJ01 sp012517775	99.17	0.88
DUQX01 sp012520035 FDU072	Firmicutes	d__Bacteria;p__Firmicutes_D;c__Dethiobacteria;o__DTU022;f__UBA8154;g__DUQX01;s__DUQX01 sp012520035	99.22	0.92
DULO01 sp.FDU073	Firmicutes	d__Bacteria;p__Firmicutes_E;c__DTU015;o__D8A-2;f__D2;g__DULO01;s__	N/A	N/A
JAAYDI01 sp.FDU074	Planctomycetota	d__Bacteria;p__Planctomycetota;c__Planctomycetes;o__Pirellulales;f__Pirellulaceae;g__JAAYDI01;s__	N/A	N/A
UBA1433 sp.FDU075	Firmicutes	d__Bacteria;p__Firmicutes_A;c__Clostridia;o__Eubacteriales;f__UBA1433;g__UBA1433;s__	N/A	N/A
DTU022 sp.FDU076	Firmicutes	d__Bacteria;p__Firmicutes_D;c__Dethiobacteria;o__DTU022;f__DTU022;g__;s__	N/A	N/A
RBG-16-64-13 sp.FDU077	Actinobacteriota	d__Bacteria;p__Actinobacteriota;c__Thermoleophilia;o__RBG-16-64-13;f__RBG-16-64-13;g__;s__	N/A	N/A
Ch109 sp.FDU079	Firmicutes	d__Bacteria;p__Firmicutes_B;c__Syntrophomonadia;o__Ch66;f__Ch109;g__;s__	N/A	N/A
Propionicimonas sp.FDU080	Actinobacteriota	d__Bacteria;p__Actinobacteriota;c__Actinomycetia;o__Propionibacteriales;f__Propionibacteriaceae;g__Propionicimonas;s__	N/A	N/A
UBA2241 sp.FDU081	Actinobacteriota	d__Bacteria;p__Actinobacteriota;c__Thermoleophilia;o__UBA2241;f__UBA2241;g__;s__	N/A	N/A
Methanothrix soehngenii FDU082	Halobacteriota	d__Archaea;p__Halobacteriota;c__Methanosarcinia;o__Methanotrichales;f__Methanotrichaceae;g__Methanothrix;s__Methanothrix soehngenii	99.03	0.97
Proteiniborus ethanoligenes FDU083	Firmicutes	d__Bacteria;p__Firmicutes_A;c__Clostridia;o__Tissierellales;f__Proteiniboraceae;g__Proteiniborus;s__Proteiniborus ethanoligenes	99.49	0.96
JAAYJV01 sp002070275 FDU084	Hydrogenedentota	d__Bacteria;p__Hydrogenedentota;c__Hydrogenedentia;o__Hydrogenedentiales;f__CAITNO01;g__JAAYJV01;s__JAAYJV01 sp002070275	99.37	0.91
PWPN01 sp.FDU085	Planctomycetota	d__Bacteria;p__Planctomycetota;c__Phycisphaerae;o__UBA1845;f__PWPN01;g__PWPN01;s__	N/A	N/A
UBA5829 sp.FDU086	Armatimonadota	d__Bacteria;p__Armatimonadota;c__UBA5829;o__UBA5829;f__UBA5829;g__;s__	N/A	N/A
Proteiniphilum sp.FDU087	Bacteroidota	d__Bacteria;p__Bacteroidota;c__Bacteroidia;o__Bacteroidales;f__Dysgonomonadaceae;g__Proteiniphilum;s__	N/A	N/A
DTJY01 sp.FDU088	Armatimonadota	d__Bacteria;p__Armatimonadota;c__UBA5829;o__DTJY01;f__DTJY01;g__;s__	N/A	N/A
SLSP01 sp.FDU089	Chloroflexota	d__Bacteria;p__Chloroflexota;c__Anaerolineae;o__B4-G1;f__SLSP01;g__;s__	N/A	N/A
RBG-16-64-13 sp.FDU090	Actinobacteriota	d__Bacteria;p__Actinobacteriota;c__Thermoleophilia;o__RBG-16-64-13;f__RBG-16-64-13;g__;s__	N/A	N/A
UBA4975 sp002427015 FDU091	Firmicutes	d__Bacteria;p__Firmicutes_D;c__Proteinivoracia;o__UBA4975;f__UBA4975;g__UBA4975;s__UBA4975 sp002427015	98.15	0.81
UBA1431 sp.FDU092	Firmicutes	d__Bacteria;p__Firmicutes_A;c__Clostridia_A;o__Christensenellales;f__UBA1431;g__UBA1431;s__	N/A	N/A
UBA6140 sp.FDU093	Proteobacteria	d__Bacteria;p__Proteobacteria;c__Gammaproteobacteria;o__Burkholderiales;f__Methylophilaceae;g__UBA6140;s__	N/A	N/A
UBA1383 sp002305415 FDU094	Actinobacteriota	d__Bacteria;p__Actinobacteriota;c__Actinomycetia;o__Actinomycetales;f__Actinomycetaceae;g__UBA1383;s__UBA1383 sp002305415	99.49	0.85
DTJY01 sp.FDU095	Armatimonadota	d__Bacteria;p__Armatimonadota;c__UBA5829;o__DTJY01;f__DTJY01;g__;s__	N/A	N/A
SZUA-584 sp.FDU096	Firmicutes	d__Bacteria;p__Firmicutes_A;c__Clostridia_A;o__Christensenellales;f__SZUA-584;g__SZUA-584;s__	N/A	N/A
JAAYKM01 sp.FDU097	Desulfobacterota	d__Bacteria;p__Desulfobacterota;c__Syntrophia;o__Syntrophales;f__JAAYKM01;g__;s__	N/A	N/A
UBA6794 sp.FDU098	Caldatribacteriota	d__Bacteria;p__Caldatribacteriota;c__JS1;o__SB-45;f__UBA6794;g__UBA6794;s__	N/A	N/A
UBA5500 sp.FDU099	Firmicutes	d__Bacteria;p__Firmicutes_H;c__UBA994;o__UBA994;f__UBA5500;g__UBA5500;s__	N/A	N/A
DTU098 sp002305915 FDU100	Firmicutes	d__Bacteria;p__Firmicutes_B;c__Desulfotomaculia;o__Desulfotomaculales;f__Pelotomaculaceae;g__DTU098;s__DTU098 sp002305915	99.41	0.9
Hungateiclostridium sp.FDU101	Firmicutes	d__Bacteria;p__Firmicutes_A;c__Clostridia;o__Acetivibrionales;f__Acetivibrionaceae;g__Hungateiclostridium;s__	N/A	N/A
Petrimonas mucosa FDU102	Bacteroidota	d__Bacteria;p__Bacteroidota;c__Bacteroidia;o__Bacteroidales;f__Dysgonomonadaceae;g__Petrimonas;s__Petrimonas mucosa	99.54	0.94
PWPN01 sp.FDU103	Planctomycetota	d__Bacteria;p__Planctomycetota;c__Phycisphaerae;o__UBA1845;f__PWPN01;g__;s__	N/A	N/A
JAAYDC01 sp.FDU104	Chloroflexota	d__Bacteria;p__Chloroflexota;c__Anaerolineae;o__UBA1429;f__UBA1429;g__JAAYDC01;s__	N/A	N/A
SR-FBR-E99 sp.FDU105	Bacteroidota	d__Bacteria;p__Bacteroidota;c__Bacteroidia;o__Bacteroidales;f__VadinHA17;g__SR-FBR-E99;s__	N/A	N/A
Methanobacterium sp.FDU106	Methanobacteriota	d__Archaea;p__Methanobacteriota;c__Methanobacteria;o__Methanobacteriales;f__Methanobacteriaceae;g__Methanobacterium;s__	N/A	N/A
MVYY01 sp.FDU107	Bacteroidota	d__Bacteria;p__Bacteroidota;c__Bacteroidia;o__Bacteroidales;f__Paludibacteraceae;g__MVYY01;s__	N/A	N/A
Methanoregula sp.FDU108	Halobacteriota	d__Archaea;p__Halobacteriota;c__Methanomicrobia;o__Methanomicrobiales;f__Methanoregulaceae;g__Methanoregula;s__	N/A	N/A
DTIW01 sp.FDU109	Armatimonadota	d__Bacteria;p__Armatimonadota;c__UBA5829;o__UBA5829;f__UBA5829;g__DTIW01;s__	N/A	N/A
QAXR01 sp003053505 FDU110	Desulfobacterota	d__Bacteria;p__Desulfobacterota_F;c__Desulfuromonadia;o__Geobacterales;f__Geobacteraceae;g__QAXR01;s__QAXR01 sp003053505	95.82	0.85
UBA5499 sp002426275 FDU111	Firmicutes	d__Bacteria;p__Firmicutes_G;c__DTU084;o__DTU084;f__DTU084;g__UBA5499;s__UBA5499 sp002426275	98.92	0.79
JABLXU01 sp013177805 FDU112	OLB16	d__Bacteria;p__OLB16;c__OLB16;o__SURF-12;f__SURF-12;g__JABLXU01;s__JABLXU01 sp013177805	99.3	0.94
UBA1398 sp002305165 FDU113	Armatimonadota	d__Bacteria;p__Armatimonadota;c__UBA5377;o__UBA1398;f__UBA1398;g__UBA1398;s__UBA1398 sp002305165	98.9	0.95
JACIYD01 sp.FDU114	Firmicutes	d__Bacteria;p__Firmicutes_B;c__Moorellia;o__Moorellales;f__SLTJ01;g__JACIYD01;s__	N/A	N/A
Proteiniphilum saccharofermentans FDU115	Bacteroidota	d__Bacteria;p__Bacteroidota;c__Bacteroidia;o__Bacteroidales;f__Dysgonomonadaceae;g__Proteiniphilum;s__Proteiniphilum saccharofermentans	96.37	0.84
Bellilinea sp.FDU116	Chloroflexota	d__Bacteria;p__Chloroflexota;c__Anaerolineae;o__Anaerolineales;f__Anaerolineaceae;g__Bellilinea;s__	N/A	N/A
49-20 sp012517865 FDU117	Chloroflexota	d__Bacteria;p__Chloroflexota;c__Anaerolineae;o__Anaerolineales;f__Anaerolineaceae;g__49-20;s__49-20 sp012517865	99.93	0.95
D2 sp.FDU118	Firmicutes	d__Bacteria;p__Firmicutes_E;c__DTU015;o__D8A-2;f__D2;g__;s__	N/A	N/A
Sedimentibacter sp003483345 FDU119	Firmicutes	d__Bacteria;p__Firmicutes_A;c__Clostridia;o__Tissierellales;f__Sedimentibacteraceae;g__Sedimentibacter;s__Sedimentibacter sp003483345	97.75	0.68
UBA8904 sp002070455 FDU120	Desulfobacterota	d__Bacteria;p__Desulfobacterota;c__Syntrophia;o__Syntrophales;f__Smithellaceae;g__UBA8904;s__UBA8904 sp002070455	98.35	0.86
Aminivibrio sp.FDU121	Synergistota	d__Bacteria;p__Synergistota;c__Synergistia;o__Synergistales;f__Aminobacteriaceae;g__Aminivibrio;s__	N/A	N/A
DSUL01 sp.FDU122	Armatimonadota	d__Bacteria;p__Armatimonadota;c__UBA5829;o__DSUL01;f__DSUL01;g__;s__	N/A	N/A
SR-FBR-E99 sp.FDU123	Bacteroidota	d__Bacteria;p__Bacteroidota;c__Bacteroidia;o__Bacteroidales;f__VadinHA17;g__SR-FBR-E99;s__	N/A	N/A
UBA2219 sp.FDU124	Desulfobacterota	d__Bacteria;p__Desulfobacterota_E;c__MBNT15;o__MBNT15;f__MBNT15;g__UBA2219;s__	N/A	N/A
DTJY01 sp.FDU125	Armatimonadota	d__Bacteria;p__Armatimonadota;c__UBA5829;o__DTJY01;f__DTJY01;g__;s__	N/A	N/A
JAAYAV01 sp.FDU126	Chloroflexota	d__Bacteria;p__Chloroflexota;c__Anaerolineae;o__DRVO01;f__DRVO01;g__JAAYAV01;s__	N/A	N/A
UBA5069 sp.FDU127	Chloroflexota	d__Bacteria;p__Chloroflexota;c__Anaerolineae;o__Caldilineales;f__Caldilineaceae;g__UBA5069;s__	N/A	N/A
Proteiniphilum sp002410345 FDU128	Bacteroidota	d__Bacteria;p__Bacteroidota;c__Bacteroidia;o__Bacteroidales;f__Dysgonomonadaceae;g__Proteiniphilum;s__Proteiniphilum sp002410345	99.35	0.77
LD21 sp012517605 FDU129	Bacteroidota	d__Bacteria;p__Bacteroidota;c__Bacteroidia;o__Bacteroidales;f__VadinHA17;g__LD21;s__LD21 sp012517605	99.53	0.85
Sphaerochaeta sp012514185 FDU130	Spirochaetota	d__Bacteria;p__Spirochaetota;c__Spirochaetia;o__Sphaerochaetales;f__Sphaerochaetaceae;g__Sphaerochaeta;s__Sphaerochaeta sp012514185	99.1	0.8
PALSA-986 sp012513715 FDU131	Thermoproteota	d__Archaea;p__Thermoproteota;c__Bathyarchaeia;o__B26-1;f__UBA233;g__PALSA-986;s__PALSA-986 sp012513715	98.78	0.82
UBA4789 sp.FDU132	Firmicutes	d__Bacteria;p__Firmicutes_B;c__Desulfotomaculia;o__Desulfotomaculales;f__Pelotomaculaceae;g__UBA4789;s__	N/A	N/A
UBA8346 sp.FDU133	Firmicutes	d__Bacteria;p__Firmicutes_G;c__UBA4882;o__UBA8346;f__UBA8346;g__;s__	N/A	N/A
UBA5389 sp.FDU134	Firmicutes	d__Bacteria;p__Firmicutes_G;c__SHA-98;o__DTUO25;f__DTU025;g__UBA5389;s__	N/A	N/A
DTU008 sp001512965 FDU135	Thermoplasmatota	d__Archaea;p__Thermoplasmatota;c__Thermoplasmata;o__Methanomassiliicoccales;f__Methanomassiliicoccaceae;g__DTU008;s__DTU008 sp001512965	99.32	0.92
Advenella sp012923605 FDU136	Proteobacteria	d__Bacteria;p__Proteobacteria;c__Gammaproteobacteria;o__Burkholderiales;f__Burkholderiaceae;g__Advenella;s__Advenella sp012923605	99.43	0.98
UBA6126 sp.FDU137	Caldisericota	d__Bacteria;p__Caldisericota;c__Caldisericia;o__UBA6126;f__UBA6126;g__UBA6126;s__	N/A	N/A
DUVQ01 sp.FDU138	Myxococcota	d__Bacteria;p__Myxococcota;c__UBA9042;o__DTJE01;f__DTJE01;g__DUVQ01;s__	N/A	N/A
JAAXZI01 sp.FDU139	Planctomycetota	d__Bacteria;p__Planctomycetota;c__Phycisphaerae;o__UBA1845;f__PWPN01;g__JAAXZI01;s__	N/A	N/A
BRH-c25 sp.FDU140	Firmicutes	d__Bacteria;p__Firmicutes_A;c__Clostridia;o__Lutisporales;f__Lutisporaceae;g__BRH-c25;s__	N/A	N/A
MVZN01 sp.FDU141	Spirochaetota	d__Bacteria;p__Spirochaetota;c__UBA4802;o__UBA4802;f__UBA5368;g__MVZN01;s__	N/A	N/A
DTGP01 sp.FDU142	Armatimonadota	d__Bacteria;p__Armatimonadota;c__DTGP01;o__;f__;g__;s__	N/A	N/A
UBA4975 sp.FDU143	Firmicutes	d__Bacteria;p__Firmicutes_D;c__Proteinivoracia;o__UBA4975;f__UBA4975;g__;s__	N/A	N/A
UBA2279 sp.FDU144	Actinobacteriota	d__Bacteria;p__Actinobacteriota;c__Coriobacteriia;o__OPB41;f__UBA2279;g__;s__	N/A	N/A
UBA5420 sp012837925 FDU145	Firmicutes	d__Bacteria;p__Firmicutes_G;c__Limnochordia;o__DTU010;f__DTU010;g__UBA5420;s__UBA5420 sp012837925	99.22	0.85
UBA2272 sp.FDU146	Actinobacteriota	d__Bacteria;p__Actinobacteriota;c__Coriobacteriia;o__OPB41;f__UBA2279;g__UBA2272;s__	N/A	N/A
SLSP01 sp.FDU147	Chloroflexota	d__Bacteria;p__Chloroflexota;c__Anaerolineae;o__B4-G1;f__SLSP01;g__;s__	N/A	N/A
UBA4996 sp002396805 FDU148	Firmicutes	d__Bacteria;p__Firmicutes_G;c__Limnochordia;o__DTU010;f__DTU010;g__UBA4996;s__UBA4996 sp002396805	99.54	0.88
UBA2256 sp001603165 FDU149	Spirochaetota	d__Bacteria;p__Spirochaetota;c__Spirochaetia;o__Treponematales;f__UBA8932;g__UBA2256;s__UBA2256 sp001603165	99.59	0.92
Cloacimonadaceae sp.FDU150	Cloacimonadota	d__Bacteria;p__Cloacimonadota;c__Cloacimonadia;o__Cloacimonadales;f__Cloacimonadaceae;g__;s__	N/A	N/A
SZUA-584 sp.FDU151	Firmicutes	d__Bacteria;p__Firmicutes_A;c__Clostridia_A;o__Christensenellales;f__SZUA-584;g__SZUA-584;s__	N/A	N/A
UBA6103 sp.FDU152	Actinobacteriota	d__Bacteria;p__Actinobacteriota;c__Thermoleophilia;o__UBA2241;f__UBA2241;g__UBA6103;s__	N/A	N/A
DTKZ01 sp.FDU153	Spirochaetota	d__Bacteria;p__Spirochaetota;c__Spirochaetia;o__Spirochaetales_A;f__DTKZ01;g__;s__	N/A	N/A
58-81 sp.FDU154	Synergistota	d__Bacteria;p__Synergistota;c__Synergistia;o__Synergistales;f__Thermovirgaceae;g__58-81;s__	N/A	N/A
PALSA-986 sp.FDU155	Thermoproteota	d__Archaea;p__Thermoproteota;c__Bathyarchaeia;o__B26-1;f__UBA233;g__PALSA-986;s__	N/A	N/A
Thermoguttaceae sp.FDU156	Planctomycetota	d__Bacteria;p__Planctomycetota;c__Planctomycetes;o__Pirellulales;f__Thermoguttaceae;g__;s__	N/A	N/A
JAAYXZ01 sp012515635 FDU157	Ratteibacteria	d__Bacteria;p__Ratteibacteria;c__UBA8468;o__B48-G9;f__B48-G9;g__JAAYXZ01;s__JAAYXZ01 sp012515635	99.56	0.95
JACCES01 sp.FDU158	Proteobacteria	d__Bacteria;p__Proteobacteria;c__Gammaproteobacteria;o__Burkholderiales;f__Burkholderiaceae;g__JACCES01;s__	N/A	N/A
GCA-2748055 sp.FDU159	Bacteroidota	d__Bacteria;p__Bacteroidota;c__Bacteroidia;o__Bacteroidales;f__GCA-2748055;g__;s__	N/A	N/A
58-81 sp002070395 FDU160	Synergistota	d__Bacteria;p__Synergistota;c__Synergistia;o__Synergistales;f__Thermovirgaceae;g__58-81;s__58-81 sp002070395	96.59	0.88
RBG-16-64-13 sp.FDU161	Actinobacteriota	d__Bacteria;p__Actinobacteriota;c__Thermoleophilia;o__RBG-16-64-13;f__RBG-16-64-13;g__;s__	N/A	N/A
PHAA01 sp.FDU162	Firmicutes	d__Bacteria;p__Firmicutes_B;c__Syntrophomonadia;o__Syntrophomonadales;f__Syntrophomonadaceae;g__PHAA01;s__	N/A	N/A
Syntrophus aciditrophicus FDU163	Desulfobacterota	d__Bacteria;p__Desulfobacterota;c__Syntrophia;o__Syntrophales;f__Syntrophaceae;g__Syntrophus;s__Syntrophus aciditrophicus	99.34	0.98
UBA5209 sp.FDU164	Patescibacteria	d__Bacteria;p__Patescibacteria;c__Dojkabacteria;o__SC72;f__SC72;g__UBA5209;s__	N/A	N/A
Firm-13 sp.FDU165	Firmicutes	d__Bacteria;p__Firmicutes_A;c__Clostridia;o__Saccharofermentanales;f__Saccharofermentanaceae;g__Firm-13;s__	N/A	N/A
Tissierella sp.FDU166	Firmicutes	d__Bacteria;p__Firmicutes_A;c__Clostridia;o__Tissierellales;f__Tissierellaceae;g__Tissierella;s__	N/A	N/A
Actinotalea sp.FDU167	Actinobacteriota	d__Bacteria;p__Actinobacteriota;c__Actinomycetia;o__Actinomycetales;f__Cellulomonadaceae;g__Actinotalea;s__	N/A	N/A
Mesotoga infera_B FDU168	Thermotogota	d__Bacteria;p__Thermotogota;c__Thermotogae;o__Petrotogales;f__Kosmotogaceae;g__Mesotoga;s__Mesotoga infera_B	98.98	0.97
RBG-16-64-13 sp.FDU169	Actinobacteriota	d__Bacteria;p__Actinobacteriota;c__Thermoleophilia;o__RBG-16-64-13;f__RBG-16-64-13;g__RBG-16-64-13;s__	N/A	N/A
Aminobacterium colombiense FDU170	Synergistota	d__Bacteria;p__Synergistota;c__Synergistia;o__Synergistales;f__Aminobacteriaceae;g__Aminobacterium;s__Aminobacterium colombiense	97.97	0.89
UBA5072 sp.FDU171	Bacteroidota	d__Bacteria;p__Bacteroidota;c__Bacteroidia;o__Bacteroidales;f__UBA10428;g__UBA5072;s__	N/A	N/A
Bact-08 sp.FDU172	Bacteroidota	d__Bacteria;p__Bacteroidota;c__Bacteroidia;o__Bacteroidales;f__UBA932;g__Bact-08;s__	N/A	N/A
Methanofastidiosum sp001587595 FDU173	Methanobacteriota	d__Archaea;p__Methanobacteriota;c__Thermococci;o__Methanofastidiosales;f__Methanofastidiosaceae;g__Methanofastidiosum;s__Methanofastidiosum sp001587595	99.22	0.87
JAAZJW01 sp012519835 FDU174	Firmicutes	d__Bacteria;p__Firmicutes_A;c__Clostridia;o__Peptostreptococcales;f__Natronincolaceae;g__JAAZJW01;s__JAAZJW01 sp012519835	99.6	0.93
KH17 sp.FDU175	Actinobacteriota	d__Bacteria;p__Actinobacteriota;c__Actinomycetia;o__Actinomycetales;f__Actinomycetaceae;g__KH17;s__	N/A	N/A
Spiro-10 sp004294945 FDU176	Spirochaetota	d__Bacteria;p__Spirochaetota;c__Spirochaetia;o__Treponematales;f__Treponemataceae;g__Spiro-10;s__Spiro-10 sp004294945	98.03	0.75
UBA11386 sp.FDU177	Planctomycetota	d__Bacteria;p__Planctomycetota;c__Planctomycetes;o__Pirellulales;f__UBA11386;g__;s__	N/A	N/A
UBA4923 sp012511175 FDU178	Firmicutes	d__Bacteria;p__Firmicutes_A;c__Clostridia;o__Saccharofermentanales;f__DTU023;g__UBA4923;s__UBA4923 sp012511175	99.97	0.98
Delta-02 sp002408185 FDU179	Desulfobacterota	d__Bacteria;p__Desulfobacterota_G;c__Syntrophorhabdia;o__Syntrophorhabdales;f__Syntrophorhabdaceae;g__Delta-02;s__Delta-02 sp002408185	99.68	0.89
Methanolinea sp.FDU180	Halobacteriota	d__Archaea;p__Halobacteriota;c__Methanomicrobia;o__Methanomicrobiales;f__Methanoregulaceae;g__Methanolinea;s__	N/A	N/A
UBA8910 sp002069605 FDU181	Caldatribacteriota	d__Bacteria;p__Caldatribacteriota;c__Caldatribacteriia;o__Caldatribacteriales;f__UBA8910;g__UBA8910;s__UBA8910 sp002069605	99.11	0.9
Fen-1087 sp.FDU182	Desulfobacterota	d__Bacteria;p__Desulfobacterota;c__Syntrophia;o__Syntrophales;f__Fen-1087;g__Fen-1087;s__	N/A	N/A
JAAYEA01 sp012689325 FDU183	Chloroflexota	d__Bacteria;p__Chloroflexota;c__Anaerolineae;o__JAAYEA01;f__JAAYEA01;g__JAAYEA01;s__JAAYEA01 sp012689325	98.32	0.85
Desulfotomaculaceae_A sp.FDU184	Firmicutes	d__Bacteria;p__Firmicutes_B;c__Desulfotomaculia;o__Desulfotomaculales;f__Desulfotomaculaceae_A;g__;s__	N/A	N/A
Fen-1166 sp.FDU185	Desulfobacterota	d__Bacteria;p__Desulfobacterota;c__Syntrophia;o__Syntrophales;f__Smithellaceae;g__Fen-1166;s__	N/A	N/A
UBA2268 sp.FDU186	Bacteroidota	d__Bacteria;p__Bacteroidota;c__Kapabacteria;o__Kapabacteriales;f__UBA2268;g__;s__	N/A	N/A
UBA288 sp.FDU187	Halobacteriota	d__Archaea;p__Halobacteriota;c__Methanomicrobia;o__Methanomicrobiales;f__Methanosphaerulaceae;g__UBA288;s__	N/A	N/A
Methanosarcina mazei FDU188	Halobacteriota	d__Archaea;p__Halobacteriota;c__Methanosarcinia;o__Methanosarcinales;f__Methanosarcinaceae;g__Methanosarcina;s__Methanosarcina mazei	99.17	0.99
JAAXZI01 sp012719955 FDU189	Planctomycetota	d__Bacteria;p__Planctomycetota;c__Phycisphaerae;o__UBA1845;f__PWPN01;g__JAAXZI01;s__JAAXZI01 sp012719955	99.76	0.96
B3-TA06 sp.FDU190	WOR-3	d__Bacteria;p__WOR-3;c__WOR-3;o__B3-TA06;f__B3-TA06;g__B3-TA06;s__	N/A	N/A
Mesotoga sp002305955 FDU191	Thermotogota	d__Bacteria;p__Thermotogota;c__Thermotogae;o__Petrotogales;f__Kosmotogaceae;g__Mesotoga;s__Mesotoga sp002305955	99.53	0.9
B3-TA06 sp012517375 FDU192	WOR-3	d__Bacteria;p__WOR-3;c__WOR-3;o__B3-TA06;f__B3-TA06;g__B3-TA06;s__B3-TA06 sp012517375	99.52	0.93
UBA4175 sp002379855 FDU193	Cloacimonadota	d__Bacteria;p__Cloacimonadota;c__Cloacimonadia;o__Cloacimonadales;f__Cloacimonadaceae;g__UBA4175;s__UBA4175 sp002379855	98.4	0.94
UBA4971 sp012512055 FDU194	Firmicutes	d__Bacteria;p__Firmicutes_G;c__SHA-98;o__UBA4971;f__UBA4971;g__UBA4971;s__UBA4971 sp012512055	98.99	0.78
Syntrophobacter fumaroxidans FDU195	Desulfobacterota	d__Bacteria;p__Desulfobacterota;c__Syntrophobacteria;o__Syntrophobacterales;f__Syntrophobacteraceae;g__Syntrophobacter;s__Syntrophobacter fumaroxidans	95.93	0.91
DTU059 sp.FDU196	Firmicutes	d__Bacteria;p__Firmicutes_A;c__Clostridia;o__Acetivibrionales;f__DSM-8532;g__DTU059;s__	N/A	N/A
Thauera sp.FDU197	Proteobacteria	d__Bacteria;p__Proteobacteria;c__Gammaproteobacteria;o__Burkholderiales;f__Rhodocyclaceae;g__Thauera;s__	N/A	N/A
JAAYBG01 sp012718985 FDU198	Firmicutes	d__Bacteria;p__Firmicutes;c__Bacilli;o__ML615J-28;f__CAG-698;g__JAAYBG01;s__JAAYBG01 sp012718985	99.27	0.74
Bryobacteraceae sp.FDU199	Acidobacteriota	d__Bacteria;p__Acidobacteriota;c__Acidobacteriae;o__Bryobacterales;f__Bryobacteraceae;g__;s__	N/A	N/A
UBA5352 sp.FDU200	Armatimonadota	d__Bacteria;p__Armatimonadota;c__UBA5377;o__UBA5377;f__UBA5352;g__;s__	N/A	N/A
UBA1419 sp002305585 FDU201	Actinobacteriota	d__Bacteria;p__Actinobacteriota;c__Coriobacteriia;o__Coriobacteriales;f__UBA8131;g__UBA1419;s__UBA1419 sp002305585	98.93	0.92
UBA2241 sp.FDU202	Actinobacteriota	d__Bacteria;p__Actinobacteriota;c__Thermoleophilia;o__UBA2241;f__UBA2241;g__;s__	N/A	N/A
Lysinibacillus_B sp.FDU203	Firmicutes	d__Bacteria;p__Firmicutes;c__Bacilli;o__Bacillales_A;f__Planococcaceae;g__Lysinibacillus_B;s__	N/A	N/A
JAAYIR01 sp.FDU204	Armatimonadota	d__Bacteria;p__Armatimonadota;c__UBA5377;o__UBA5377;f__JAAYIR01;g__JAAYIR01;s__	N/A	N/A
Fen-1342 sp.FDU205	Planctomycetota	d__Bacteria;p__Planctomycetota;c__Phycisphaerae;o__UBA1845;f__Fen-1342;g__Fen-1342;s__	N/A	N/A
Bact-08 sp009929175 FDU206	Bacteroidota	d__Bacteria;p__Bacteroidota;c__Bacteroidia;o__Bacteroidales;f__UBA932;g__Bact-08;s__Bact-08 sp009929175	97.7	0.92
Proteiniclasticum sp003514505 FDU207	Firmicutes	d__Bacteria;p__Firmicutes_A;c__Clostridia;o__Clostridiales;f__Clostridiaceae;g__Proteiniclasticum;s__Proteiniclasticum sp003514505	98.94	0.81
UBA4810 sp002418825 FDU208	Desulfobacterota	d__Bacteria;p__Desulfobacterota;c__Syntrophia;o__Syntrophales;f__Smithellaceae;g__UBA4810;s__UBA4810 sp002418825	98.85	0.83
