# Supplementary material
Source: MDPI journal article supplement (https://www.mdpi.com/2311-5637/9/4/387)
Supplement: s1 [file s1 › table S5.xlsx]

## Sheet: Sheet1
Table S3 Summary of KEGG annotation of the GBs with high quality ("Y" indicates the presence of related gene in the GB)
ID	UBA4975 sp012727415 FDU001	JAAYED01 sp.FDU002	UBA5829 sp.FDU003	T3SED10-260 sp.FDU004	JACIYB01 sp.FDU005	UBA8901 sp.FDU006	Ch29 sp.FDU007	Propionicimonas sp.FDU008	RBG-16-66-30 sp.FDU009	DTU080 sp.FDU010	UBA6794 sp.FDU011	UBA5829 sp.FDU012	Syntrophobacterales sp.FDU013	JABUFB01 sp.FDU014	DUNV01 sp.FDU015	JAAYBY01 sp.FDU016	JAAYIR01 sp012523355 FDU017	Fermentibacter sp.FDU018	JABLXH01 sp.FDU019	58-81 sp012729145 FDU020	Brooklawnia sp012517405 FDU021	Mariniphaga sp.FDU022	JAAYUK01 sp012517735 FDU023	MWBF01 sp.FDU024	Cloacimonas sp002432865 FDU025	UBA5420 sp.FDU026	Pirellulales sp.FDU027	JAAZMI01 sp.FDU028	DTU010 sp.FDU029	Aminivibrio sp009929115 FDU030	Methanothrix_A sp001602645 FDU031	MVQK01 sp.FDU032	LD21 sp.FDU033	DSM-8532 sp.FDU034	UBA1398 sp.FDU035	DTU024 sp.FDU036	UBA4179 sp002849245 FDU037	Syntrophosphaera sp012516855 FDU038	DUOT01 sp.FDU039	Desulfovibrionaceae sp.FDU040	UBA2224 sp012719295 FDU041	Cloacimonadaceae sp.FDU042	UBA1383 sp002304945 FDU043	Bact-08 sp001897515 FDU044	UBA8910 sp012517485 FDU045	UBA2199 sp.FDU046	Syner-03 sp002316795 FDU047	DSUL01 sp.FDU048	JAAYKS01 sp.FDU049
K00001	/	/	Y	/	Y	/	/	Y	/	/	/	/	/	Y	/	/	/	/	Y	/	Y	/	Y	Y	Y	Y	Y	/	Y	/	/	/	Y	/	Y	/	Y	Y	/	Y	Y	Y	Y	/	/	/	/	/	Y
K00002	/	/	/	/	/	/	/	/	/	/	/	/	/	/	/	/	/	/	/	/	/	/	/	/	/	/	/	/	/	/	/	/	/	/	/	/	/	/	/	/	/	/	/	/	/	/	/	/	Y
K00003	/	Y	Y	/	Y	/	Y	Y	/	Y	Y	Y	Y	Y	Y	Y	Y	/	Y	Y	Y	/	Y	Y	/	/	Y	Y	/	/	/	Y	Y	Y	Y	Y	/	/	/	Y	Y	/	Y	/	Y	Y	Y	Y	Y
K00004	/	Y	/	/	/	/	/	/	/	/	/	/	/	/	/	/	/	/	/	/	/	/	/	/	/	/	/	/	/	/	/	/	/	/	/	Y	/	/	/	Y	/	/	/	/	/	/	/	/	/
K00005	/	/	/	/	Y	/	/	/	/	Y	/	Y	/	Y	/	/	/	/	Y	/	/	/	Y	/	/	/	Y	/	/	Y	/	/	/	/	/	Y	/	/	/	Y	/	/	/	/	/	/	/	/	/
K00006	/	/	/	/	/	/	/	/	/	/	/	/	/	/	/	/	/	/	/	/	/	/	/	/	/	/	/	/	/	/	/	/	/	/	/	/	/	/	/	/	/	/	/	/	/	/	/	/	/
K00007	/	/	/	/	/	/	/	/	/	/	/	/	/	/	/	/	/	/	/	/	/	/	/	/	/	/	/	/	/	/	/	/	/	/	/	/	/	/	/	/	/	/	/	/	/	/	/	/	/
K00008	Y	Y	Y	/	Y	/	/	/	/	Y	/	Y	Y	Y	/	Y	Y	/	Y	/	Y	Y	/	Y	/	Y	Y	/	Y	Y	Y	/	Y	/	Y	Y	/	/	/	Y	Y	/	/	/	Y	/	/	Y	Y
K00009	/	/	Y	/	/	/	/	/	/	/	/	Y	/	Y	/	Y	Y	/	Y	/	/	Y	/	Y	/	/	/	/	/	/	/	/	/	/	Y	Y	/	/	/	/	Y	/	/	/	Y	/	/	/	/
K00010	/	Y	Y	/	/	/	/	/	/	Y	Y	Y	/	Y	/	Y	Y	/	Y	/	/	/	/	Y	/	Y	Y	/	Y	/	/	/	/	/	Y	/	/	/	/	/	Y	/	Y	/	Y	/	/	Y	Y
K00011	/	/	/	/	/	/	/	/	/	/	/	/	/	/	/	/	/	/	/	/	/	/	/	/	/	/	/	/	/	/	/	/	/	/	/	/	/	/	/	/	/	/	/	/	/	/	/	/	/
K00012	Y	/	Y	/	/	Y	/	/	/	/	/	/	Y	/	Y	/	/	Y	/	Y	Y	Y	Y	Y	/	/	/	Y	/	/	/	/	Y	/	Y	/	Y	Y	Y	Y	Y	/	/	Y	/	/	Y	Y	/
K00013	/	Y	Y	Y	Y	/	Y	Y	/	Y	/	Y	/	Y	/	Y	Y	/	Y	Y	Y	Y	Y	Y	/	/	Y	Y	/	Y	Y	Y	Y	Y	Y	/	Y	/	/	Y	Y	/	Y	Y	Y	Y	Y	Y	Y
K00014	/	/	Y	/	/	/	Y	/	/	Y	/	Y	Y	Y	Y	Y	Y	Y	Y	/	Y	Y	Y	Y	/	Y	Y	Y	Y	/	Y	Y	Y	/	/	Y	Y	/	/	Y	Y	/	Y	/	Y	/	Y	Y	Y
K00015	Y	/	Y	/	/	/	/	/	/	Y	/	Y	/	Y	/	Y	/	/	/	Y	Y	/	Y	Y	/	Y	/	/	Y	Y	/	/	/	/	Y	/	Y	Y	/	Y	/	Y	/	/	Y	/	Y	/	/
K00016	/	/	Y	/	/	/	/	/	/	Y	/	/	Y	/	Y	/	/	/	/	/	Y	/	/	Y	/	/	/	/	/	/	/	Y	/	/	/	/	/	/	/	/	Y	/	Y	/	Y	/	/	/	/
K00018	/	Y	/	/	Y	/	Y	/	/	/	/	/	Y	/	/	/	/	/	/	/	/	Y	Y	/	/	/	Y	/	/	/	/	/	Y	Y	/	/	Y	/	/	/	Y	/	/	/	/	/	/	/	Y
K00019	/	/	/	/	/	/	/	/	/	/	/	/	/	/	/	/	/	/	/	Y	/	/	/	/	/	/	/	/	/	Y	/	/	/	/	/	/	/	/	/	/	/	/	/	/	Y	/	Y	/	/
K00020	/	/	Y	/	/	/	Y	/	/	Y	/	/	Y	Y	/	Y	/	/	Y	/	Y	/	/	/	/	/	Y	/	/	Y	/	/	/	Y	/	/	/	/	/	Y	/	/	/	/	/	/	Y	Y	Y
K00021	/	/	/	/	/	/	/	/	/	/	/	/	/	/	/	/	/	/	/	/	/	/	/	/	/	/	/	/	/	/	/	/	/	/	/	/	/	/	/	/	/	/	/	/	/	/	/	/	Y
K00022	/	/	/	/	/	/	/	/	/	/	/	/	/	/	/	/	/	/	/	/	/	/	/	/	/	/	/	/	/	/	/	/	/	/	/	/	/	/	/	/	/	/	/	/	/	/	/	/	/
K00023	/	/	/	/	/	/	/	/	/	/	/	/	/	/	/	/	/	/	/	/	/	/	/	/	/	/	/	/	/	/	/	/	/	/	/	/	/	/	/	/	/	Y	/	/	/	/	/	/	/
K00024	/	/	/	/	/	/	/	Y	Y	/	/	/	Y	/	/	/	Y	/	Y	/	Y	Y	/	Y	/	/	Y	/	/	/	/	/	/	/	Y	/	Y	/	/	Y	Y	/	Y	Y	/	Y	/	/	/
K00025	/	/	/	/	/	/	/	/	/	/	/	/	/	/	/	/	/	/	/	/	/	/	/	/	/	/	/	/	/	/	/	/	/	/	/	/	/	/	/	/	/	/	/	/	/	/	/	/	/
K00026	/	/	/	/	/	/	/	/	/	/	/	/	/	/	/	/	/	/	/	/	/	/	/	/	/	/	/	/	/	/	/	/	/	/	/	/	/	/	/	/	/	/	/	/	/	/	/	/	/
K00027	Y	Y	/	Y	Y	Y	Y	/	/	/	Y	Y	Y	Y	Y	Y	/	/	/	Y	Y	/	Y	/	Y	Y	/	/	Y	Y	Y	Y	/	Y	/	Y	/	Y	Y	/	/	Y	/	/	Y	Y	Y	Y	Y
K00028	/	/	/	/	/	/	/	/	/	/	/	/	/	/	/	/	/	/	/	/	/	/	/	/	/	/	/	/	/	/	/	/	/	/	/	/	/	/	/	/	/	/	/	/	/	/	/	/	/
K00029	/	/	/	/	/	/	/	/	/	/	/	/	/	/	/	/	/	/	/	/	/	/	/	Y	/	/	/	/	/	/	/	/	/	/	/	/	/	/	/	Y	Y	/	Y	/	/	/	/	/	/
K00030	/	Y	Y	/	/	/	Y	/	/	Y	/	Y	/	Y	Y	/	Y	/	Y	/	/	/	/	/	/	/	Y	Y	/	/	Y	/	/	/	Y	/	/	/	/	/	Y	/	/	/	Y	/	/	Y	/
K00031	/	/	/	/	/	/	/	Y	/	/	/	/	Y	/	/	/	/	/	/	/	Y	Y	Y	Y	/	/	/	/	/	/	/	Y	Y	Y	/	/	Y	/	/	Y	Y	/	/	/	/	/	/	/	/
K00032	/	/	/	/	/	/	/	/	/	/	/	/	/	/	/	/	/	/	/	/	/	/	/	/	/	/	/	/	/	/	/	/	/	/	/	/	/	/	/	/	/	/	/	/	/	/	/	/	/
K00033	/	Y	/	/	/	/	/	/	/	Y	/	Y	/	Y	/	Y	Y	/	Y	/	Y	Y	Y	Y	/	Y	Y	/	Y	Y	Y	/	Y	Y	Y	Y	Y	/	Y	Y	Y	/	Y	Y	Y	/	/	/	Y
K00034	/	Y	/	/	/	/	Y	/	/	Y	/	/	/	Y	/	Y	/	/	/	/	Y	/	Y	/	/	/	/	/	/	/	/	/	/	/	/	/	/	/	/	/	Y	/	/	/	/	/	/	/	/
K00035	/	/	/	/	/	/	/	/	/	/	/	/	/	/	/	/	/	/	/	/	/	/	/	/	/	/	/	/	/	/	/	/	/	/	/	/	/	/	/	/	/	/	/	/	/	/	/	/	/
K00036	/	Y	/	/	/	/	/	/	/	Y	/	Y	/	Y	/	/	Y	/	/	/	Y	Y	Y	Y	/	/	Y	/	Y	/	/	/	Y	/	Y	Y	Y	/	Y	/	Y	/	Y	Y	/	/	/	Y	/
K00037	/	/	/	/	/	/	/	/	/	/	/	/	/	/	/	/	/	/	/	/	/	/	/	/	/	/	/	/	/	/	/	/	/	/	/	/	/	/	/	/	/	/	/	/	/	/	/	/	/
K00038	/	/	/	/	/	/	/	/	/	/	/	/	/	/	/	/	/	/	/	/	/	/	/	/	/	/	/	/	/	/	/	/	/	/	/	Y	/	/	Y	/	/	/	/	/	/	/	/	/	/
K00039	/	/	/	/	/	/	/	/	/	/	/	/	/	/	/	/	/	/	/	/	/	/	/	/	/	/	/	/	/	/	/	/	/	/	/	/	/	/	/	/	/	/	/	/	/	/	/	/	/
K00040	/	/	/	/	/	/	/	/	/	/	/	/	/	/	/	/	/	/	/	/	Y	/	/	/	/	/	/	/	/	Y	/	/	/	Y	/	/	/	/	/	/	/	/	Y	/	/	/	/	/	Y
K00041	/	/	/	/	/	/	/	/	/	/	/	/	/	/	/	/	/	/	/	/	/	/	/	/	/	/	/	/	/	/	/	/	/	/	/	/	/	/	/	/	/	/	/	/	/	/	/	/	/
K00042	/	Y	Y	/	/	/	/	/	/	/	Y	Y	Y	/	/	Y	/	/	/	/	Y	/	Y	/	/	/	/	/	/	Y	/	/	/	/	/	Y	/	/	/	Y	/	/	/	/	/	/	/	Y	Y
K00043	/	/	/	/	/	/	/	/	/	/	/	/	/	/	/	/	/	/	/	/	/	/	/	/	/	/	/	/	/	/	/	/	/	/	/	/	/	/	/	/	/	/	/	/	/	/	/	/	/
K00044	/	/	/	/	/	/	/	/	/	/	/	/	/	/	/	/	/	/	/	/	/	/	/	/	/	/	/	/	/	/	/	/	/	/	/	/	/	/	/	/	/	/	/	/	/	/	/	/	/
K00045	/	/	/	/	/	/	/	/	/	/	/	/	/	/	/	/	/	/	/	/	/	/	/	/	/	/	/	/	/	/	/	/	/	/	/	/	/	/	/	/	/	/	/	/	/	/	/	/	/
K00046	Y	Y	Y	/	Y	/	Y	/	/	Y	Y	Y	/	Y	Y	Y	Y	/	Y	/	Y	/	/	Y	/	/	Y	/	Y	Y	/	/	/	Y	/	Y	Y	/	/	/	Y	/	/	/	Y	/	/	Y	/
K00048	/	/	/	/	/	/	/	/	/	/	/	/	/	/	/	/	/	/	/	/	/	/	/	/	/	/	/	/	/	/	/	/	/	/	/	/	/	/	/	/	/	/	/	/	/	/	/	/	/
K00049	/	/	/	/	/	/	/	/	/	/	/	/	/	/	/	Y	/	/	/	/	/	/	/	/	/	/	/	/	/	/	/	/	/	/	/	/	/	/	/	/	/	/	/	/	/	/	/	/	/
K00050	/	/	/	/	/	/	/	/	/	/	/	/	/	/	/	/	/	/	/	/	/	/	/	/	/	/	/	/	/	/	/	/	/	/	/	/	/	/	/	/	/	/	/	/	/	/	/	/	/
K00051	/	/	/	/	/	/	/	/	/	/	/	/	/	/	/	/	/	/	/	/	/	/	/	/	/	/	/	/	/	/	/	/	/	/	/	/	/	/	/	/	/	/	/	/	/	/	/	/	/
K00052	/	Y	Y	/	/	Y	/	Y	/	/	Y	Y	Y	Y	Y	Y	Y	Y	Y	Y	Y	Y	Y	Y	/	/	Y	Y	/	Y	/	Y	Y	Y	/	/	Y	/	/	Y	Y	/	/	/	Y	Y	Y	Y	Y
K00053	/	/	Y	/	Y	/	Y	/	/	/	Y	Y	Y	Y	Y	Y	Y	/	/	/	Y	Y	Y	Y	/	/	Y	Y	/	/	Y	Y	Y	Y	/	/	Y	/	/	Y	Y	/	Y	/	Y	/	Y	Y	Y
K00054	/	Y	/	/	/	/	/	/	/	/	/	/	Y	/	/	/	/	/	/	/	/	Y	/	Y	/	/	/	/	/	/	Y	/	/	/	/	/	/	/	/	/	/	/	/	/	/	/	/	/	/
K00055	/	/	/	/	/	/	/	/	/	/	/	/	/	/	/	/	/	/	/	/	/	/	/	/	/	/	/	/	/	/	/	/	/	/	/	/	/	/	/	Y	/	/	/	/	/	/	/	/	/
K00057	Y	/	Y	Y	Y	Y	/	/	Y	/	/	Y	Y	Y	Y	/	Y	Y	Y	Y	/	Y	Y	Y	/	Y	/	Y	/	Y	/	Y	/	Y	Y	/	Y	/	Y	Y	Y	Y	Y	Y	/	Y	Y	Y	/
K00058	Y	Y	Y	Y	/	Y	Y	Y	/	Y	Y	Y	Y	Y	/	Y	Y	Y	Y	Y	Y	Y	Y	Y	Y	Y	Y	Y	/	Y	Y	Y	Y	Y	Y	Y	Y	Y	/	Y	Y	Y	Y	Y	Y	/	Y	Y	Y
K00059	Y	Y	Y	Y	Y	/	Y	Y	Y	Y	Y	Y	Y	Y	Y	Y	Y	Y	Y	Y	Y	Y	Y	Y	Y	Y	Y	Y	Y	Y	/	Y	Y	Y	Y	Y	Y	Y	Y	Y	Y	Y	Y	Y	Y	Y	Y	Y	Y
K00060	Y	/	/	/	/	Y	Y	/	/	Y	/	Y	Y	Y	/	Y	/	/	/	/	/	Y	/	/	/	Y	/	/	Y	/	/	/	Y	/	/	Y	Y	/	Y	/	/	/	Y	/	/	Y	/	/	Y
K00061	/	/	/	/	/	/	/	Y	/	/	/	/	/	/	/	/	/	/	/	/	/	/	/	/	/	/	/	/	/	/	/	/	/	/	/	/	/	/	/	/	/	/	/	/	/	/	/	/	/
K00062	/	/	/	/	/	/	/	/	/	/	/	/	/	/	/	/	/	/	/	/	/	/	/	/	/	/	/	/	/	/	/	/	/	/	/	/	/	/	/	/	/	/	/	/	/	/	/	/	/
K00063	/	/	/	/	/	/	/	/	/	/	/	/	/	/	/	/	/	/	/	/	/	/	/	/	/	/	/	/	/	/	/	/	/	/	/	/	/	/	/	/	/	/	/	/	/	/	/	/	/
K00064	/	/	/	/	/	/	/	/	/	/	/	/	/	/	/	/	/	/	/	/	/	/	/	Y	/	/	/	/	/	/	/	/	Y	/	/	/	/	/	/	/	/	/	/	/	/	/	/	/	/
K00065	/	Y	/	/	/	/	/	/	/	/	/	/	Y	Y	/	/	/	/	Y	Y	Y	/	/	/	/	Y	Y	/	Y	Y	/	/	/	/	/	/	/	/	/	/	/	/	/	/	/	/	/	/	/
K00066	/	/	/	/	/	Y	/	/	/	/	/	/	/	/	/	/	/	/	/	/	/	/	/	/	/	/	/	/	/	/	/	/	/	/	/	/	/	/	/	/	/	/	/	/	/	/	/	/	/
K00067	/	Y	Y	/	Y	Y	/	/	/	/	/	Y	/	Y	Y	/	Y	Y	Y	/	/	Y	Y	Y	/	/	Y	Y	/	/	Y	/	Y	/	Y	/	/	/	/	Y	Y	Y	/	Y	/	Y	/	Y	/
K00068	/	/	Y	/	/	/	/	/	/	/	/	Y	/	Y	/	/	Y	/	Y	/	/	/	/	Y	/	/	/	/	/	/	/	/	/	/	Y	Y	/	/	/	/	Y	/	/	/	Y	/	/	/	/
K00069	/	/	/	/	/	/	/	/	/	/	/	/	/	/	/	/	/	/	/	/	/	/	/	/	/	/	/	/	/	/	/	/	/	/	/	/	/	/	/	/	/	/	/	/	/	/	/	/	/
K00070	/	/	/	/	/	/	/	/	/	/	/	/	/	/	/	/	/	/	/	/	/	/	/	/	/	/	/	/	/	/	/	/	/	/	/	/	/	/	/	/	/	/	/	/	/	/	/	/	/
K00071	/	/	/	/	/	/	/	/	/	/	/	/	/	/	/	/	/	/	/	/	/	/	/	/	/	/	/	/	/	/	/	/	/	/	/	/	/	/	/	/	/	/	/	/	/	/	/	/	/
K00072	/	/	/	/	/	/	/	/	/	/	/	/	/	/	/	/	/	/	/	/	/	/	/	/	/	/	/	/	/	/	/	/	/	/	/	/	/	/	/	/	/	/	/	/	/	/	/	/	/
K00073	/	Y	/	/	/	/	Y	/	/	/	/	/	/	/	/	/	/	/	/	/	/	/	Y	/	/	Y	Y	/	/	Y	/	/	/	/	/	/	/	/	/	/	Y	/	/	/	/	/	/	/	Y
K00074	Y	/	/	/	Y	/	/	/	/	/	/	/	Y	/	Y	/	/	/	Y	Y	Y	/	Y	Y	/	Y	/	Y	Y	/	/	Y	/	/	/	Y	Y	/	/	/	/	/	/	/	/	/	/	/	/
K00075	Y	Y	Y	Y	/	Y	Y	Y	/	Y	Y	Y	Y	Y	Y	Y	Y	Y	Y	Y	Y	Y	Y	Y	/	Y	Y	Y	Y	/	/	Y	Y	Y	Y	/	Y	Y	/	Y	Y	Y	Y	/	Y	Y	Y	Y	Y
K00076	/	/	/	/	/	/	/	/	/	/	/	/	/	/	/	/	/	/	/	/	/	/	/	/	/	/	/	/	/	/	/	/	/	/	/	/	/	/	/	/	/	/	/	/	/	/	/	/	/
K00077	/	/	/	/	/	Y	Y	Y	/	/	/	Y	Y	Y	/	/	/	Y	Y	Y	Y	Y	Y	Y	/	/	/	/	/	Y	Y	/	Y	Y	/	Y	/	/	/	/	Y	/	Y	/	/	Y	Y	/	Y
K00078	/	Y	Y	/	/	/	/	/	/	/	/	/	/	/	/	Y	/	/	/	/	/	Y	/	/	/	/	/	/	/	/	/	/	Y	Y	Y	/	/	/	Y	/	/	/	Y	/	/	/	/	Y	/
K00079	/	/	/	/	/	/	/	/	/	/	/	/	/	/	/	/	/	/	/	/	/	/	/	/	/	/	/	/	/	/	/	/	/	/	/	/	/	/	/	/	/	/	/	/	/	/	/	/	/
K00081	/	/	/	/	/	/	/	/	/	/	/	/	/	/	/	/	/	/	/	/	/	/	/	/	/	/	/	/	/	/	/	/	/	/	/	/	/	/	/	/	/	/	/	/	/	/	/	/	/
K00082	/	/	/	/	/	/	/	/	/	/	/	/	/	/	/	/	/	/	/	/	/	/	/	/	/	/	/	/	/	/	/	/	/	/	/	/	/	/	/	/	/	/	/	/	/	/	/	/	/
K00083	/	/	/	/	/	/	/	/	/	/	/	/	/	/	/	/	/	/	/	/	/	/	/	/	/	/	/	/	/	/	/	/	/	/	/	/	/	/	/	/	/	/	/	/	/	/	/	/	/
K00084	/	/	/	/	/	/	/	/	/	/	/	/	/	/	/	/	/	/	/	/	/	/	/	/	/	/	/	/	/	/	/	/	/	/	/	/	/	/	/	/	/	/	/	/	/	/	/	/	/
K00085	/	/	/	/	/	/	/	/	/	/	/	/	/	/	/	/	/	/	/	/	/	/	/	/	/	/	/	/	/	/	/	/	/	/	/	/	/	/	/	/	/	/	/	/	/	/	/	/	/
K00086	Y	/	/	/	/	/	/	/	/	/	/	/	/	/	/	/	/	/	/	/	/	/	Y	/	/	/	/	Y	/	Y	/	/	/	/	/	/	/	/	/	Y	/	/	/	/	/	/	/	/	/
K00087	/	/	/	/	/	/	/	/	/	/	Y	/	/	/	/	/	/	/	/	/	/	/	/	Y	/	/	/	/	/	/	/	Y	/	/	/	/	/	/	/	/	/	/	/	/	/	Y	Y	/	/
K00088	Y	Y	Y	Y	Y	Y	Y	Y	/	Y	/	Y	Y	/	Y	/	Y	Y	Y	Y	Y	Y	Y	Y	Y	Y	Y	Y	Y	Y	/	Y	Y	Y	Y	Y	Y	Y	Y	Y	Y	Y	Y	Y	Y	Y	Y	Y	Y
K00089	/	/	/	/	/	/	/	/	/	/	/	/	/	/	/	/	/	/	/	/	/	/	/	/	/	/	/	/	/	/	/	/	/	/	/	/	/	/	/	/	/	/	/	/	/	/	/	/	/
K00090	/	/	/	/	/	/	/	/	/	/	Y	Y	/	/	/	/	/	/	/	/	/	/	/	Y	/	/	/	/	/	/	/	/	/	/	/	/	/	/	/	/	/	/	/	/	/	/	/	/	/
K00091	Y	/	/	/	/	Y	/	/	Y	/	Y	/	Y	/	/	/	/	/	Y	/	/	/	/	Y	/	/	Y	Y	Y	/	/	/	Y	Y	/	Y	/	Y	/	/	/	/	/	/	/	/	/	/	Y
K00093	/	/	/	/	/	/	/	/	/	/	/	/	/	/	/	/	/	/	/	/	/	/	/	/	/	/	/	/	/	/	/	/	/	/	/	/	/	/	/	/	/	/	/	/	/	/	/	/	/
K00094	/	/	/	/	/	/	/	/	/	/	/	/	/	/	/	/	/	/	/	/	/	/	/	/	/	/	/	/	/	/	/	/	/	/	/	/	/	/	/	/	/	/	/	/	/	/	/	/	/
K00095	/	/	/	/	/	/	/	/	/	/	/	/	/	/	/	/	/	/	/	/	/	/	/	/	/	/	/	/	/	/	/	/	/	/	/	/	/	/	/	/	/	/	/	/	/	/	/	/	/
K00096	/	/	/	/	/	/	/	/	/	Y	/	/	/	/	/	/	/	/	/	/	/	/	/	Y	/	/	Y	/	/	/	Y	/	/	Y	Y	Y	/	/	/	/	Y	/	/	/	Y	/	/	/	/
K00097	/	Y	/	/	/	Y	/	/	/	/	/	/	Y	/	/	/	/	/	/	/	/	Y	Y	/	/	/	/	/	/	Y	/	/	/	/	/	/	Y	/	/	Y	/	/	/	Y	/	Y	/	/	Y
K00098	/	/	/	/	/	/	/	/	/	/	/	/	/	/	/	/	/	/	/	/	Y	/	/	/	/	/	/	/	/	/	/	/	/	/	/	/	/	/	/	/	/	/	/	/	/	/	/	/	/
K00099	Y	/	Y	Y	Y	Y	Y	Y	/	Y	/	Y	Y	/	Y	Y	Y	Y	Y	Y	Y	Y	Y	/	Y	Y	Y	Y	Y	Y	/	Y	Y	Y	/	Y	Y	Y	Y	Y	Y	Y	Y	Y	Y	/	/	Y	Y
K00100	/	/	/	/	/	/	/	/	/	/	/	/	/	/	/	/	/	/	/	/	/	/	/	/	/	/	/	/	/	/	/	/	/	Y	/	/	/	/	/	/	/	/	/	/	/	/	/	/	/
K00101	/	/	/	/	/	/	/	/	/	/	/	/	/	/	/	/	/	/	/	/	/	/	/	/	/	/	/	/	/	/	/	/	/	/	/	/	/	/	/	/	/	/	/	/	/	/	/	/	/
K00102	/	Y	/	/	/	/	/	/	/	/	/	Y	/	Y	/	/	Y	/	/	/	/	/	/	/	/	/	/	/	/	/	/	/	/	/	/	/	/	/	/	Y	/	/	/	/	/	Y	/	/	/
K00103	/	/	/	/	/	/	/	/	/	/	/	/	/	/	/	/	/	/	/	/	/	/	/	/	/	/	/	/	/	/	/	/	/	/	/	/	/	/	/	/	/	/	/	/	/	/	/	/	/
K00104	Y	/	Y	/	Y	Y	Y	/	/	/	/	Y	/	/	/	Y	/	Y	/	Y	Y	/	Y	Y	/	Y	/	Y	/	/	/	/	/	/	/	/	/	/	Y	Y	/	/	/	/	Y	Y	Y	Y	/
K00105	/	/	/	/	/	/	/	/	/	/	/	/	/	/	/	/	/	/	/	/	/	/	/	/	/	/	/	/	/	/	/	/	/	/	/	/	/	/	/	/	/	/	/	/	/	/	/	/	/
K00106	/	/	/	/	/	/	/	/	/	/	/	/	/	/	/	/	/	/	/	/	/	/	/	/	/	/	/	/	/	/	/	/	/	/	/	/	/	/	/	/	/	/	/	/	/	/	/	/	/
K00107	/	/	/	/	/	/	/	/	/	/	/	/	/	/	/	/	/	/	/	/	/	/	/	/	/	/	/	/	/	/	/	/	/	/	/	/	/	/	/	/	/	/	/	/	/	/	/	/	/
K00108	/	/	/	/	/	/	/	/	/	/	/	/	/	/	/	/	/	/	/	/	/	/	/	/	/	/	/	/	/	/	/	/	/	/	/	/	/	/	/	/	/	/	/	/	/	/	/	/	/
K00109	/	/	/	/	/	/	/	/	/	/	/	/	/	/	/	/	/	/	/	/	/	/	/	/	/	/	/	/	/	/	/	/	/	/	/	/	/	/	/	/	/	/	/	/	/	/	/	/	/
K00111	Y	/	/	/	/	/	/	Y	Y	Y	/	/	/	/	Y	/	/	/	/	/	Y	Y	/	/	/	Y	Y	/	Y	/	/	/	Y	Y	Y	Y	/	/	Y	/	/	/	Y	/	Y	/	/	/	/
K00112	/	/	/	/	/	/	/	Y	/	/	/	/	/	/	/	/	/	/	/	/	Y	/	/	/	/	/	/	/	/	/	/	/	/	/	/	/	/	/	/	/	/	/	/	/	/	/	/	/	/
K00113	/	/	/	/	/	/	/	Y	/	/	/	/	/	/	/	/	/	/	/	/	/	/	/	/	/	/	/	/	/	/	/	/	/	/	/	/	/	/	/	/	/	/	/	/	/	/	/	/	/
K00114	/	/	/	/	/	/	/	/	/	/	/	/	/	/	/	/	/	/	/	/	/	/	/	/	/	/	/	/	/	/	/	/	/	/	/	/	/	/	/	/	/	/	/	/	/	/	/	/	/
K00115	/	/	/	/	/	/	/	/	/	/	/	/	/	/	/	/	/	/	/	/	/	/	/	/	/	/	/	/	/	/	/	/	/	/	/	/	/	/	/	/	/	/	/	/	/	/	/	/	/
K00116	/	/	/	/	/	/	/	/	/	/	/	/	/	/	/	/	/	/	/	/	/	/	/	/	/	/	/	/	/	/	/	/	/	/	/	/	/	/	/	/	/	/	/	/	/	/	/	/	/
K00117	/	/	Y	/	/	/	/	/	/	/	Y	Y	/	/	/	/	/	/	/	Y	/	/	/	/	/	/	/	/	/	/	/	/	/	/	/	/	/	/	/	/	/	/	Y	/	Y	/	/	/	/
K00118	/	/	/	/	/	/	/	/	/	/	/	/	/	Y	/	/	/	/	/	/	/	Y	/	/	/	/	/	/	/	/	/	/	/	/	/	/	/	/	/	/	/	/	/	/	Y	/	/	/	/
K00121	/	/	Y	/	/	/	/	/	/	/	/	/	/	Y	/	/	/	/	/	/	/	/	/	/	/	/	/	/	/	/	/	/	/	Y	/	/	/	/	/	/	/	/	/	/	/	/	/	/	/
K00122	/	/	/	/	/	/	/	/	/	/	/	/	/	/	/	/	/	/	/	/	/	/	/	/	/	/	/	/	/	/	/	/	/	/	/	/	/	/	/	/	/	/	/	/	/	/	/	/	/
K00123	Y	Y	/	Y	Y	Y	Y	/	Y	/	Y	/	Y	/	/	/	/	Y	/	Y	/	/	Y	Y	/	Y	Y	Y	Y	Y	Y	Y	Y	/	/	/	/	Y	/	Y	/	Y	Y	/	/	/	/	/	Y
K00124	Y	/	/	/	Y	/	Y	/	/	/	/	/	/	/	Y	/	/	/	/	/	/	/	Y	/	/	/	/	Y	/	/	Y	Y	/	/	/	/	/	/	/	Y	/	/	/	/	/	/	/	/	/
K00125	/	/	/	/	/	/	/	/	/	/	/	/	/	/	/	/	/	/	/	/	/	/	/	/	/	/	/	/	/	/	/	/	/	/	/	/	/	/	/	/	/	/	/	/	/	/	/	/	/
K00126	/	/	/	/	/	/	/	/	/	/	/	/	/	/	/	/	/	/	/	/	/	/	/	/	/	/	/	/	/	/	/	/	/	/	/	/	/	/	/	/	/	/	/	/	/	/	/	/	/
K00127	/	/	/	/	Y	/	/	/	/	/	/	/	/	/	/	/	/	/	/	/	/	/	Y	/	/	/	/	/	/	/	/	/	/	/	/	/	/	/	/	/	/	/	/	/	/	/	/	/	/
K00128	/	/	/	/	Y	/	/	/	/	/	/	/	/	Y	/	/	Y	/	/	/	/	/	/	/	/	/	/	/	/	/	/	/	Y	/	/	/	/	/	Y	/	Y	/	Y	/	/	/	/	/	/
K00129	/	/	/	/	/	/	/	/	/	/	/	/	/	/	/	/	/	/	/	/	/	/	/	/	/	/	/	/	/	/	/	/	/	/	/	/	/	/	/	/	/	/	/	/	/	/	/	/	/
K00130	/	/	/	/	/	/	/	/	/	/	/	/	/	/	Y	/	/	/	Y	/	Y	/	/	/	/	/	/	/	/	/	/	/	/	/	/	/	/	/	/	/	/	/	/	/	/	/	/	/	/
K00131	/	/	/	/	/	Y	/	/	/	/	/	/	/	/	/	/	/	Y	/	/	/	/	/	/	/	/	/	/	/	/	/	/	/	/	/	/	/	/	/	/	/	/	/	/	/	/	/	/	/
K00132	/	/	/	/	/	/	/	/	/	/	/	/	/	/	/	/	/	/	/	/	Y	/	Y	/	/	/	/	/	/	/	/	/	/	/	/	/	/	/	/	/	/	/	/	/	/	/	/	/	/
K00133	Y	Y	Y	Y	/	Y	Y	/	/	/	/	Y	Y	Y	Y	Y	Y	Y	Y	Y	Y	Y	Y	Y	Y	Y	Y	Y	Y	Y	/	Y	Y	Y	/	Y	Y	Y	/	/	Y	Y	Y	Y	/	Y	Y	Y	Y
K00134	Y	Y	Y	/	Y	Y	Y	Y	Y	/	Y	Y	Y	Y	Y	Y	Y	Y	/	Y	Y	Y	Y	Y	Y	Y	Y	Y	Y	Y	/	Y	Y	Y	Y	Y	Y	Y	Y	Y	Y	Y	Y	Y	/	/	Y	/	Y
K00135	/	/	/	/	/	/	/	Y	/	Y	/	/	/	Y	/	/	/	/	Y	/	Y	/	/	/	/	/	/	/	/	/	Y	/	/	/	/	/	/	/	/	Y	/	/	Y	/	Y	Y	/	/	/
K00137	/	/	/	/	/	/	/	/	/	/	/	/	/	/	/	/	/	/	/	/	/	/	/	/	/	/	/	/	/	/	/	/	/	/	/	/	/	/	/	/	/	/	/	/	/	/	/	/	/
K00138	/	/	/	/	/	/	/	/	/	/	/	/	/	/	/	/	/	/	/	/	/	/	/	/	/	/	/	/	/	/	/	/	/	/	/	/	/	/	/	/	/	/	/	/	/	/	/	/	/
K00139	/	/	/	/	/	/	/	/	/	/	/	/	/	/	/	/	/	/	/	/	/	/	/	/	/	/	/	/	/	/	/	/	/	/	/	/	/	/	/	/	/	/	/	/	/	/	/	/	/
K00140	/	Y	/	/	/	/	/	Y	/	/	Y	/	Y	/	/	/	/	/	/	/	/	/	/	Y	/	/	/	Y	/	/	/	/	/	/	/	/	/	/	/	/	/	/	/	/	/	/	/	/	Y
K00141	/	/	/	/	/	/	/	/	/	/	/	/	/	/	/	/	/	/	/	/	/	/	/	/	/	/	/	/	/	/	/	/	/	/	/	/	/	/	/	/	/	/	/	/	/	/	/	/	/
K00142	/	/	/	/	/	/	/	/	/	/	/	/	/	/	/	/	/	/	/	/	/	/	/	/	/	/	/	/	/	/	/	/	/	/	/	/	/	/	/	/	/	/	/	/	/	/	/	/	/
K00143	/	/	/	/	/	/	/	/	/	/	/	/	/	/	/	/	/	/	/	/	/	/	/	/	/	/	/	/	/	/	/	/	/	/	/	/	/	/	/	/	/	/	/	/	/	/	/	/	/
K00145	/	/	Y	/	Y	/	Y	Y	/	Y	Y	Y	Y	Y	Y	Y	Y	/	Y	/	Y	Y	Y	Y	/	/	Y	Y	/	/	Y	Y	/	Y	/	/	Y	/	/	Y	Y	/	Y	Y	Y	/	/	Y	Y
K00146	/	/	/	/	/	/	/	/	/	/	/	/	/	/	/	/	/	/	/	/	/	/	/	/	/	/	/	/	/	/	/	/	/	/	/	/	/	/	/	/	/	/	/	/	/	/	/	/	/
K00147	/	Y	Y	/	Y	/	/	/	/	Y	/	Y	Y	Y	Y	/	Y	/	Y	/	Y	/	Y	Y	/	/	Y	Y	/	/	/	Y	Y	Y	/	Y	Y	/	/	Y	Y	/	Y	/	Y	/	/	/	Y
K00148	/	/	/	/	/	/	/	/	/	/	/	/	/	/	/	/	/	/	/	/	/	/	/	/	/	/	/	/	/	/	/	/	/	/	/	/	/	/	/	/	/	/	/	/	/	/	/	/	/
K00149	/	/	/	/	/	/	/	/	/	/	/	/	/	/	/	/	/	/	/	/	/	/	/	/	/	/	/	/	/	/	/	/	/	/	/	/	/	/	/	/	/	/	/	/	/	/	/	/	/
K00150	/	/	/	/	/	/	/	/	/	/	/	/	/	/	/	/	/	/	/	Y	/	/	/	/	/	/	/	/	/	/	Y	/	/	/	/	/	/	/	/	/	/	/	/	/	/	/	/	/	/
K00151	/	/	/	/	/	/	/	/	/	/	/	/	/	/	/	/	/	/	/	/	/	/	/	/	/	/	/	/	/	/	/	/	/	/	/	/	/	/	/	/	/	/	Y	/	/	/	/	/	/
K00152	/	/	/	/	/	/	/	/	/	/	/	/	/	/	/	/	/	/	/	/	/	/	/	/	/	/	/	/	/	/	/	/	/	/	/	/	/	/	/	/	/	/	/	/	/	/	/	/	/
K00153	/	/	/	/	/	/	/	/	/	/	/	/	/	/	/	/	/	/	/	/	/	/	/	/	/	/	/	/	/	/	/	/	/	/	/	/	/	/	/	/	/	/	/	/	/	/	/	/	/
K00154	/	/	/	/	/	/	/	/	/	/	/	/	/	/	/	/	/	/	/	/	/	/	/	/	/	/	/	/	/	/	/	/	/	/	/	/	/	/	/	/	/	/	/	/	/	/	/	/	/
K00156	/	/	/	/	/	/	/	Y	/	/	/	/	/	/	/	/	/	/	/	/	Y	/	/	/	/	/	/	/	/	/	/	/	/	/	/	/	/	/	/	/	/	/	/	/	/	/	/	/	/
K00157	/	/	/	/	/	/	/	/	/	/	/	/	/	/	/	/	/	/	/	/	/	/	/	/	/	/	/	/	/	/	/	/	/	/	/	/	/	/	/	/	/	/	/	/	/	/	/	/	/
K00158	/	/	/	/	/	/	/	/	/	Y	/	/	/	/	/	/	/	/	/	/	/	/	/	/	/	/	/	/	/	/	/	Y	/	/	/	/	/	/	/	/	/	/	/	/	/	/	/	/	/
K00161	/	/	Y	/	/	/	/	Y	/	/	/	Y	Y	/	/	Y	/	/	/	/	Y	/	/	Y	/	Y	/	/	/	/	/	/	/	Y	/	/	Y	/	Y	/	/	Y	Y	Y	/	/	/	Y	/
K00162	/	/	Y	/	/	/	/	Y	/	/	/	Y	/	/	/	Y	/	/	/	/	/	/	/	Y	/	Y	/	/	/	/	/	/	/	Y	/	/	Y	/	Y	/	/	Y	Y	Y	/	/	/	Y	/
K00163	/	/	/	/	/	/	/	Y	/	/	/	/	/	/	/	/	/	/	/	/	Y	/	/	/	/	/	Y	/	/	/	/	/	/	/	/	/	/	/	/	/	Y	/	Y	/	/	/	/	/	/
K00164	/	/	/	/	/	/	/	/	/	/	/	/	/	/	/	/	/	/	/	/	Y	Y	/	/	/	/	Y	/	/	/	/	/	/	/	/	/	Y	/	/	/	Y	/	Y	/	/	/	/	Y	/
K00166	/	/	/	/	/	/	/	/	/	Y	/	/	/	/	/	/	/	/	/	/	/	/	/	/	/	/	/	/	/	/	/	/	/	/	/	/	/	/	/	/	/	/	/	/	/	/	/	/	/
K00167	/	/	/	/	/	/	/	/	/	/	/	/	/	/	/	/	/	/	/	/	/	/	/	/	/	/	/	/	/	/	/	/	/	/	/	/	/	/	/	/	/	/	/	/	/	/	/	/	/
K00169	/	Y	Y	/	/	Y	Y	/	/	Y	Y	/	Y	Y	Y	/	Y	/	Y	Y	/	/	Y	/	/	Y	/	Y	/	/	Y	Y	/	/	Y	/	/	/	/	/	/	/	Y	/	/	/	Y	/	/
K00170	/	Y	Y	/	Y	Y	Y	/	Y	Y	Y	/	Y	Y	Y	/	Y	/	/	Y	/	/	Y	/	/	/	/	Y	/	/	Y	Y	/	/	Y	/	/	/	/	/	/	/	Y	/	/	/	Y	/	/
K00171	/	Y	Y	/	Y	Y	Y	/	/	Y	Y	/	Y	Y	/	/	Y	/	/	Y	/	/	Y	/	/	/	/	/	/	/	Y	/	/	/	Y	/	/	/	/	/	/	/	Y	/	/	/	Y	Y	/
K00172	/	Y	Y	/	Y	Y	Y	/	Y	Y	Y	/	Y	Y	/	/	/	/	Y	Y	/	/	Y	/	/	Y	/	/	/	/	Y	Y	/	/	Y	/	/	/	/	/	/	/	/	/	/	Y	Y	/	/
K00174	Y	Y	Y	Y	Y	Y	Y	Y	Y	/	Y	Y	Y	/	/	Y	Y	Y	Y	Y	Y	Y	Y	Y	Y	Y	/	Y	Y	Y	Y	Y	Y	Y	Y	Y	Y	Y	Y	Y	/	Y	/	Y	Y	/	Y	Y	Y
K00175	Y	Y	Y	Y	/	Y	Y	Y	Y	/	Y	Y	Y	Y	Y	/	Y	Y	Y	Y	/	Y	Y	Y	Y	Y	/	Y	Y	Y	Y	Y	Y	Y	Y	Y	Y	Y	Y	Y	/	Y	/	Y	Y	Y	Y	Y	Y
K00176	Y	/	Y	Y	/	/	/	/	/	/	Y	/	/	/	/	/	/	/	/	Y	/	Y	/	/	Y	/	/	/	/	Y	/	Y	Y	/	/	/	Y	Y	/	Y	/	Y	/	Y	/	/	Y	Y	/
K00177	Y	/	Y	Y	/	Y	Y	/	/	/	Y	Y	Y	Y	Y	/	Y	Y	Y	Y	/	Y	Y	Y	Y	Y	/	Y	Y	Y	/	Y	Y	Y	Y	Y	Y	Y	Y	Y	/	Y	/	Y	Y	Y	Y	Y	Y
K00179	Y	Y	Y	Y	Y	Y	Y	/	Y	/	Y	Y	Y	Y	Y	/	/	/	/	Y	/	Y	Y	Y	Y	/	Y	Y	/	Y	Y	Y	Y	Y	/	/	/	Y	/	Y	Y	Y	Y	/	Y	Y	Y	Y	Y
K00180	Y	/	Y	Y	Y	Y	Y	Y	Y	/	Y	Y	Y	Y	Y	/	/	Y	Y	Y	/	Y	Y	Y	Y	/	Y	Y	/	Y	Y	Y	Y	Y	Y	/	/	Y	/	Y	Y	Y	Y	/	Y	Y	Y	Y	Y
K00181	/	/	/	/	/	/	/	/	/	/	/	/	/	/	/	/	/	/	/	/	/	/	/	/	/	/	/	/	/	/	/	/	/	/	/	/	/	/	/	/	/	/	/	/	/	/	/	/	/
K00182	/	/	/	/	/	/	/	/	/	/	/	/	/	/	/	/	/	/	/	/	/	/	/	/	/	/	/	/	/	/	/	/	/	/	/	/	/	/	/	/	/	/	/	/	/	/	/	/	/
K00183	/	/	/	/	/	/	/	/	/	/	/	/	/	/	/	/	/	/	/	/	/	/	/	/	/	/	/	/	/	/	/	/	/	/	/	/	Y	/	/	/	/	/	/	/	/	/	/	/	/
K00184	/	/	/	/	/	/	/	/	/	/	/	Y	Y	/	/	/	/	/	/	/	/	Y	Y	/	/	/	Y	/	/	/	/	/	/	/	/	/	Y	/	/	Y	/	/	/	/	/	/	/	/	/
K00185	/	/	/	/	/	/	/	/	/	/	/	Y	Y	/	/	/	/	/	/	/	/	Y	Y	/	/	/	Y	/	/	/	/	/	/	/	/	/	/	/	/	Y	/	/	/	/	/	/	/	/	/
K00186	/	/	/	/	/	/	/	/	/	/	/	/	/	/	/	/	/	Y	/	/	/	/	/	/	/	/	/	/	/	/	Y	/	/	/	/	/	/	/	/	/	/	/	/	/	/	/	/	/	/
K00187	/	/	/	/	/	/	/	/	/	/	/	/	/	/	Y	/	/	Y	/	/	/	/	/	/	/	Y	/	/	/	/	Y	/	/	/	/	/	/	/	/	/	/	/	/	/	/	Y	/	/	/
K00188	/	/	/	/	/	/	/	/	/	/	/	/	/	/	/	/	/	/	/	/	/	/	/	/	/	/	/	/	/	/	/	/	/	/	/	/	/	/	/	/	/	/	/	/	/	/	/	/	/
K00189	/	/	/	/	/	/	/	/	/	/	/	/	/	/	/	/	/	/	/	/	/	/	/	/	/	/	/	/	/	/	/	/	/	/	/	/	/	/	/	/	/	/	/	/	/	/	/	/	/
K00192	/	/	/	/	/	/	/	/	/	/	/	/	/	/	/	/	/	/	/	/	/	/	/	/	/	/	/	/	/	/	/	/	/	/	/	/	/	/	/	/	/	/	/	/	/	/	/	/	/
K00193	/	/	/	/	/	/	/	/	/	/	/	/	/	/	/	/	/	/	/	/	/	/	/	/	/	/	/	/	/	/	/	/	/	/	/	/	/	/	/	/	/	/	/	/	/	/	/	/	/
K00194	/	/	/	/	/	/	/	/	/	/	/	/	Y	/	Y	/	/	/	/	/	/	/	/	Y	/	/	/	Y	/	/	Y	/	/	/	/	/	/	/	/	/	/	/	/	/	/	/	/	/	/
K00195	/	/	/	/	/	/	/	/	/	/	/	/	/	/	/	/	/	/	/	/	/	/	/	/	/	/	/	/	/	/	/	/	/	/	/	/	/	/	/	/	/	/	/	/	/	/	/	/	/
K00196	/	Y	/	/	/	/	Y	/	/	/	/	Y	/	Y	/	/	Y	/	Y	/	/	/	/	/	/	/	/	/	/	/	Y	/	/	/	/	/	/	/	/	Y	/	/	/	/	Y	/	Y	/	Y
K00197	/	/	/	/	/	/	/	/	Y	/	/	/	Y	/	Y	/	/	/	/	/	/	/	Y	Y	/	/	/	Y	/	/	Y	/	/	/	/	/	/	/	/	/	/	/	/	/	/	/	Y	/	Y
K00198	/	/	/	/	/	/	/	/	/	/	/	/	Y	/	/	/	Y	/	/	/	/	/	/	Y	/	/	/	Y	/	/	Y	/	/	/	/	/	/	/	/	Y	/	/	/	/	/	/	/	/	/
K00200	/	/	/	/	/	/	/	/	/	/	/	/	/	/	/	/	/	/	/	Y	/	/	/	/	/	/	/	/	/	/	Y	/	/	/	/	/	/	/	/	/	/	/	/	/	/	/	/	/	/
K00201	/	/	/	/	/	/	/	/	/	/	/	/	/	/	/	/	/	/	/	Y	/	/	/	/	/	/	/	/	/	/	Y	/	/	/	/	/	/	/	/	/	/	/	/	/	/	/	/	/	/
K00202	/	/	/	/	/	/	/	/	/	/	/	/	/	/	/	/	/	/	/	/	/	/	/	/	/	/	/	/	/	/	Y	/	/	/	/	/	/	/	/	/	/	/	/	/	/	/	/	/	/
K00203	/	/	/	/	/	/	/	/	/	/	/	/	/	/	/	/	/	/	/	Y	/	/	/	/	/	/	/	/	/	/	Y	/	/	/	/	/	/	/	/	/	/	/	/	/	/	/	/	/	/
K00204	/	/	/	/	/	/	/	/	/	/	/	/	/	/	/	/	/	/	/	/	/	/	/	/	/	/	/	/	/	/	/	/	/	/	/	/	/	/	/	/	/	/	/	/	/	/	/	/	/
K00205	/	Y	/	/	/	/	/	/	/	/	/	/	/	/	/	/	/	/	/	/	/	/	/	/	/	/	/	/	/	/	Y	/	/	/	/	/	/	/	/	/	/	/	/	/	/	/	/	/	/
K00207	/	/	/	/	/	/	/	/	/	/	/	/	/	/	/	/	/	/	/	/	/	/	/	/	/	/	/	/	/	/	/	/	/	/	/	/	/	/	/	/	/	Y	/	/	/	Y	/	/	/
K00208	/	/	/	/	/	/	/	Y	/	Y	/	/	/	Y	Y	/	/	/	/	/	Y	Y	/	Y	/	Y	Y	Y	Y	/	/	/	Y	/	/	/	Y	/	/	Y	Y	Y	Y	Y	/	/	/	/	/
K00209	/	/	/	/	/	/	/	/	/	/	/	/	/	/	/	/	/	/	/	/	/	/	/	/	/	/	/	/	/	/	/	/	/	/	/	/	/	/	/	/	/	/	/	/	/	/	/	/	/
K00210	/	/	/	/	/	/	/	/	/	/	/	/	/	/	/	/	/	/	/	/	/	/	/	/	/	/	/	/	/	/	/	/	/	/	/	/	Y	/	/	/	/	/	/	/	/	/	/	/	/
K00211	/	/	/	/	/	/	/	/	/	/	/	/	/	/	/	/	/	/	/	/	/	/	/	/	/	/	/	/	/	/	/	/	/	/	/	/	/	/	/	/	/	/	/	/	/	/	/	/	/
K00212	/	/	/	/	/	/	/	/	/	/	/	/	/	/	/	/	/	/	/	/	/	/	/	/	/	/	/	/	/	/	/	/	/	/	/	/	/	/	/	/	/	/	/	/	/	/	/	/	/
K00213	/	/	/	/	/	/	/	/	/	/	/	/	/	/	/	/	/	/	/	/	/	/	/	/	/	/	/	/	/	/	/	/	/	/	/	/	/	/	/	/	/	/	/	/	/	/	/	/	/
K00214	/	/	/	/	/	/	/	/	/	/	/	/	/	/	/	/	/	/	/	/	/	/	/	/	/	/	/	/	/	/	/	/	/	/	/	/	/	/	/	/	/	/	/	/	/	/	/	/	/
K00215	/	/	Y	Y	/	Y	Y	Y	/	Y	Y	Y	Y	Y	Y	Y	Y	Y	Y	Y	Y	Y	Y	/	Y	Y	Y	Y	Y	Y	Y	Y	Y	Y	Y	Y	Y	Y	/	Y	Y	Y	Y	/	Y	/	Y	Y	Y
K00216	/	/	/	/	/	/	/	/	/	/	/	/	/	/	/	/	/	/	/	/	/	/	/	/	/	/	/	/	/	/	/	/	/	/	/	/	/	/	/	/	/	/	/	/	/	/	/	/	/
K00217	/	/	/	/	/	/	/	/	/	/	/	/	/	/	/	/	/	/	/	/	/	/	/	/	/	/	/	/	/	/	/	/	/	/	/	/	/	/	/	/	/	/	/	/	/	/	/	/	/
K00218	/	/	/	/	/	/	/	/	/	/	/	/	/	/	/	/	/	/	/	/	/	/	/	/	/	/	/	/	/	/	/	/	/	/	/	/	/	/	/	/	/	/	/	Y	/	/	/	/	/
K00219	/	/	/	/	/	/	/	/	/	/	/	/	/	Y	/	/	/	/	/	/	Y	/	Y	/	/	Y	/	Y	/	/	/	/	Y	/	/	/	Y	/	/	/	/	/	/	/	Y	/	Y	/	/
K00220	/	/	/	/	/	/	/	/	/	/	/	/	/	/	/	/	/	/	/	/	/	/	/	/	/	/	/	/	/	/	/	/	/	/	Y	/	/	/	/	/	/	/	/	/	/	/	/	/	/
K00221	/	/	/	/	/	/	/	/	/	/	/	/	/	/	/	/	/	/	/	/	/	/	/	/	/	/	/	/	/	/	/	/	/	/	/	/	/	/	/	/	/	/	/	/	/	/	/	/	/
K00222	/	/	/	/	/	/	/	/	/	/	/	/	/	/	/	/	/	/	/	/	/	/	/	/	/	/	/	/	/	/	/	/	/	/	/	/	/	/	/	/	/	/	/	Y	/	/	/	/	/
K00223	/	/	/	/	/	/	/	/	/	/	/	/	/	/	/	/	/	/	/	/	/	/	/	/	/	/	/	/	/	/	/	/	/	/	/	/	/	/	/	/	/	/	/	/	/	/	/	/	/
K00225	/	/	/	/	/	/	/	/	/	/	/	/	/	/	/	/	/	/	/	/	/	/	/	/	/	/	/	/	/	/	/	/	/	/	/	/	/	/	/	/	/	/	/	/	/	/	/	/	/
K00226	Y	/	Y	/	/	/	/	/	/	/	Y	Y	/	Y	/	/	/	/	Y	/	Y	Y	/	Y	/	/	Y	/	/	/	/	/	Y	/	/	/	Y	/	Y	/	/	/	Y	Y	Y	/	/	/	/
K00227	/	/	/	/	/	/	/	/	/	/	/	/	/	/	/	/	/	/	/	/	/	/	/	/	/	/	/	/	/	/	/	/	/	/	/	/	/	/	/	/	/	/	/	/	/	/	/	/	/
K00228	/	/	/	/	/	/	/	/	/	/	/	/	/	/	/	/	/	/	/	/	/	/	/	/	/	/	/	/	/	/	/	/	/	/	/	/	/	/	/	/	/	/	/	/	/	/	/	/	/
K00230	/	/	/	Y	/	/	/	/	/	/	/	/	/	/	Y	/	Y	/	/	/	/	/	/	Y	/	/	/	/	/	/	/	/	/	/	/	/	/	/	/	/	/	/	Y	/	/	/	/	/	/
K00231	/	/	/	/	/	/	/	/	/	/	/	/	/	/	/	/	/	/	/	/	/	/	Y	Y	/	/	Y	/	/	/	/	/	/	/	/	/	Y	/	/	/	Y	/	/	/	/	/	/	/	/
K00232	/	/	/	/	/	/	/	/	/	/	/	/	/	/	/	/	/	/	/	/	/	/	/	/	/	/	/	/	/	/	/	/	/	/	/	/	/	/	/	/	/	/	/	/	/	/	/	/	/
K00234	/	/	/	/	/	/	/	/	/	/	/	/	/	/	/	/	/	/	/	/	/	/	/	/	/	/	/	/	/	/	/	/	/	/	/	/	/	/	/	/	/	/	/	/	/	/	/	/	/
K00235	/	/	/	/	/	/	/	/	/	/	/	/	/	/	/	/	/	/	/	/	/	/	/	/	/	/	/	/	/	/	/	/	/	/	/	/	/	/	/	/	/	/	/	/	/	/	/	/	/
K00236	/	/	/	/	/	/	/	/	/	/	/	/	/	/	/	/	/	/	/	/	/	/	/	/	/	/	/	/	/	/	/	/	/	/	/	/	/	/	/	/	/	/	/	/	/	/	/	/	/
K00237	/	/	/	/	/	/	/	/	/	/	/	/	/	/	/	/	/	/	/	/	/	/	/	/	/	/	/	/	/	/	/	/	/	/	/	/	/	/	/	/	/	/	/	/	/	/	/	/	/
K00239	/	Y	Y	/	/	Y	Y	Y	/	/	/	/	Y	/	/	/	/	/	/	/	Y	Y	Y	Y	/	/	Y	/	/	Y	/	/	Y	/	Y	/	Y	/	/	/	Y	/	Y	Y	/	/	/	Y	/
K00240	/	/	Y	/	/	/	/	Y	/	/	/	/	Y	/	/	/	/	/	/	/	Y	Y	Y	Y	/	/	Y	/	/	/	/	/	Y	/	Y	/	Y	/	/	/	Y	/	Y	Y	/	Y	/	Y	/
K00241	/	/	Y	/	/	/	/	Y	/	/	/	/	Y	/	/	/	/	/	/	/	Y	Y	Y	Y	/	/	Y	/	/	/	/	/	Y	/	/	/	Y	/	/	/	Y	/	Y	Y	/	Y	/	Y	/
K00242	/	/	Y	/	/	/	/	/	/	/	/	/	Y	/	/	/	/	/	/	/	/	/	/	/	/	/	/	/	/	/	/	/	/	/	Y	/	/	/	/	/	/	/	/	/	/	Y	/	/	/
K00243	/	/	/	/	/	/	/	/	/	/	/	/	/	/	/	/	/	/	/	/	/	/	/	/	/	/	/	/	/	/	/	/	/	/	/	/	/	/	Y	/	/	/	/	/	/	/	/	/	/
K00244	/	/	/	/	/	/	/	/	/	/	/	/	/	/	/	/	/	/	/	/	/	/	Y	/	/	Y	/	/	/	/	/	/	/	/	/	Y	/	/	/	Y	/	/	/	/	/	/	/	/	/
K00245	/	/	/	/	/	/	/	/	/	/	/	/	/	/	/	/	/	/	/	/	/	/	/	/	/	/	/	/	/	/	/	/	/	/	/	/	/	/	/	/	/	/	/	/	/	/	/	/	/
K00246	/	/	/	/	/	/	/	/	/	/	/	/	/	/	/	/	/	/	/	/	/	/	/	/	/	/	/	/	/	/	/	/	/	/	/	/	/	/	/	Y	/	/	/	/	/	/	/	/	/
K00247	/	/	/	/	/	/	/	/	/	/	/	/	/	/	/	/	/	/	/	/	/	/	/	/	/	/	/	/	/	/	/	/	/	/	/	/	/	/	/	/	/	/	/	/	/	/	/	/	/
K00248	/	/	Y	Y	Y	Y	/	/	/	/	/	Y	Y	Y	Y	/	Y	Y	Y	/	/	Y	Y	/	Y	/	/	Y	/	/	/	Y	Y	Y	Y	/	/	Y	/	/	/	Y	/	/	/	/	/	/	/
K00249	/	/	/	/	Y	/	/	/	Y	/	/	/	/	/	/	/	/	/	/	/	Y	Y	/	Y	/	/	Y	/	/	/	/	Y	/	/	/	/	Y	/	/	/	/	/	/	Y	/	Y	/	/	/
K00251	/	/	/	/	/	/	/	/	/	/	/	/	/	/	/	/	/	/	/	/	/	/	/	/	/	/	/	/	/	/	/	/	/	/	/	/	/	/	/	/	/	/	/	/	/	/	/	/	/
K00252	/	/	/	/	/	/	/	/	/	/	/	/	/	/	/	/	/	/	/	/	/	/	/	/	/	/	/	/	/	/	/	/	/	/	/	/	/	/	/	/	/	/	/	/	/	/	/	/	/
K00253	/	/	/	/	/	/	/	/	/	/	/	/	/	/	/	/	/	/	/	/	/	/	/	/	/	/	/	/	/	/	/	/	/	/	/	/	/	/	/	/	/	/	/	/	/	/	/	/	/
K00254	/	/	/	/	/	/	/	Y	/	/	/	/	/	/	/	/	/	/	/	/	Y	/	/	Y	/	/	/	/	/	/	/	/	/	/	/	/	/	/	/	/	/	/	Y	Y	/	/	/	/	/
K00255	/	/	/	/	/	/	/	/	/	/	/	/	/	/	/	/	/	/	/	/	/	/	/	/	/	/	/	/	/	/	/	/	/	/	/	/	/	/	/	/	/	/	/	/	/	/	/	/	/
K00256	/	/	/	/	/	/	/	/	Y	/	/	/	/	/	/	/	/	/	/	/	/	/	/	/	/	/	/	/	/	/	/	/	/	/	/	/	/	/	/	/	/	/	/	/	/	/	/	/	/
K00257	/	/	/	/	/	/	/	/	/	/	/	/	/	/	/	/	/	/	/	/	/	/	/	/	/	/	/	/	/	/	/	/	/	/	/	/	/	/	/	/	/	/	/	/	/	/	/	/	/
K00259	/	Y	/	/	/	/	/	/	/	Y	Y	/	Y	Y	/	/	Y	/	Y	/	/	Y	/	Y	/	/	/	/	/	/	/	Y	Y	/	Y	/	Y	/	/	Y	Y	/	Y	/	/	/	Y	/	Y
K00260	Y	/	/	/	/	/	Y	/	/	/	/	/	/	/	/	/	/	/	/	/	/	/	/	/	/	/	/	Y	/	/	/	/	/	/	/	/	/	/	/	/	/	/	/	/	/	/	/	/	/
K00261	/	/	Y	Y	/	Y	/	/	/	Y	Y	Y	Y	Y	Y	Y	Y	Y	Y	Y	/	/	/	Y	/	Y	/	/	/	/	Y	/	/	Y	/	/	/	/	/	/	Y	/	Y	/	Y	Y	Y	Y	/
K00262	/	/	/	/	/	Y	/	/	/	/	/	/	/	Y	/	Y	/	Y	/	/	Y	Y	/	/	Y	/	Y	/	/	/	/	Y	Y	Y	/	Y	Y	Y	Y	/	Y	Y	/	Y	/	/	/	/	Y
K00263	Y	/	/	/	/	/	/	/	/	/	/	/	/	/	/	/	/	/	/	/	/	/	/	/	/	/	/	/	/	/	/	/	/	/	/	/	/	/	Y	/	/	/	/	/	/	/	/	/	/
K00264	/	/	/	/	/	/	/	/	/	/	/	/	/	/	/	/	/	/	/	/	/	/	/	/	/	/	/	/	/	/	/	/	/	/	/	/	/	/	/	/	/	/	/	/	/	/	/	/	/
K00265	/	/	/	/	/	/	/	/	/	/	/	/	/	/	/	/	/	/	/	/	Y	/	Y	/	/	/	Y	/	/	/	/	/	Y	/	/	/	Y	/	/	Y	Y	/	Y	/	/	/	/	/	/
K00266	Y	Y	Y	/	Y	/	Y	Y	/	/	Y	Y	/	Y	/	Y	Y	Y	Y	/	Y	/	/	Y	/	Y	Y	Y	Y	/	Y	Y	Y	Y	/	Y	Y	/	Y	Y	Y	Y	Y	Y	/	Y	Y	Y	Y
K00270	/	/	/	/	/	/	/	/	/	/	/	/	/	/	/	/	/	/	/	/	/	/	/	/	/	/	/	/	/	/	/	/	/	/	/	/	/	/	/	/	/	/	/	/	/	/	/	/	/
K00271	/	/	/	/	/	/	/	/	/	/	/	/	/	/	/	/	/	/	/	/	/	/	/	/	/	/	/	/	/	/	/	/	/	/	/	/	/	/	/	/	/	/	/	/	/	/	/	/	/
K00272	/	/	/	/	/	/	/	/	/	/	/	/	/	/	/	/	/	/	/	/	/	/	/	/	/	/	/	/	/	/	/	/	/	/	/	/	/	/	/	/	/	/	/	/	/	/	/	/	/
K00273	/	/	/	/	/	/	/	/	/	/	/	/	/	/	/	/	/	/	/	/	/	/	Y	/	/	/	/	/	/	/	/	/	Y	/	/	/	/	/	/	/	/	/	/	/	/	/	/	/	/
K00274	/	/	/	/	/	/	/	/	/	/	/	/	/	/	/	/	/	/	/	/	/	/	/	/	/	/	/	/	/	/	/	/	/	Y	/	/	/	/	/	/	/	/	/	/	/	/	/	/	/
K00275	/	/	/	/	/	/	/	/	/	/	/	/	/	/	/	Y	/	/	/	/	Y	Y	/	/	/	/	/	/	/	/	/	/	Y	/	/	/	Y	/	/	/	/	/	/	Y	/	/	/	/	/
K00276	/	/	/	/	/	/	/	/	/	/	/	/	/	/	/	/	/	/	/	/	/	/	/	/	/	/	/	/	/	/	/	/	/	/	/	/	/	/	/	/	/	/	/	/	/	/	/	/	/
K00277	/	/	/	/	/	/	/	/	/	/	/	/	/	/	/	/	/	/	/	/	/	/	/	/	/	/	/	/	/	/	/	/	/	/	/	/	/	/	/	/	/	/	/	/	/	/	/	/	/
K00278	Y	Y	Y	/	Y	Y	/	/	/	Y	/	Y	Y	Y	/	/	Y	Y	/	/	/	Y	Y	Y	Y	/	/	/	/	/	/	Y	Y	Y	Y	/	Y	/	/	Y	/	Y	Y	Y	Y	/	Y	Y	Y
K00279	/	/	/	/	/	/	/	/	/	/	/	/	/	/	/	/	/	/	/	/	/	/	/	/	/	/	/	/	/	/	/	/	/	/	/	/	/	/	/	/	/	/	/	/	/	/	/	/	/
K00280	/	/	/	/	/	/	/	/	/	/	/	/	/	/	/	/	/	/	/	/	/	/	/	/	/	/	/	/	/	/	/	/	/	/	/	/	/	/	/	/	/	/	/	/	/	/	/	/	/
K00281	/	/	/	/	/	/	/	/	/	/	/	/	/	/	/	/	/	/	/	/	Y	Y	/	/	/	/	/	/	/	/	/	/	Y	/	/	/	Y	/	/	/	/	/	Y	/	/	/	/	/	/
K00282	Y	Y	Y	Y	Y	Y	/	/	Y	Y	Y	/	Y	/	/	/	/	Y	/	Y	/	/	/	Y	Y	Y	Y	Y	Y	/	/	Y	/	Y	Y	Y	/	Y	Y	Y	Y	Y	/	/	/	Y	Y	Y	/
K00283	Y	Y	Y	Y	/	Y	/	/	/	Y	Y	/	Y	/	/	/	/	Y	/	Y	/	/	/	Y	Y	Y	Y	Y	Y	Y	/	Y	/	Y	Y	Y	/	Y	Y	Y	Y	Y	/	/	/	/	Y	/	Y
K00284	/	/	/	/	/	/	/	/	/	/	/	/	/	/	/	/	/	/	/	/	/	/	/	Y	/	/	/	/	/	/	/	/	/	Y	/	/	/	/	/	/	/	/	/	/	/	/	/	/	/
K00285	/	/	/	/	/	/	/	/	/	/	/	/	/	/	/	/	/	/	/	/	/	/	/	/	/	/	/	/	/	/	/	/	/	/	/	/	/	/	/	/	/	/	/	/	/	/	/	/	/
K00286	/	Y	Y	/	/	/	Y	/	/	Y	Y	Y	Y	Y	Y	/	Y	/	Y	Y	Y	Y	Y	Y	/	/	Y	Y	/	Y	/	Y	Y	Y	Y	Y	Y	/	/	Y	Y	/	Y	/	Y	/	Y	Y	Y
K00287	/	/	/	/	/	/	/	Y	/	/	/	/	/	/	/	/	/	/	/	/	Y	Y	/	/	/	/	/	/	/	/	/	/	Y	Y	/	Y	Y	Y	Y	/	/	Y	Y	Y	/	/	/	/	Y
K00288	/	/	/	/	/	/	/	/	/	/	/	/	/	/	/	/	/	/	/	/	/	/	/	/	/	/	/	/	/	/	/	/	/	/	/	/	/	/	/	/	/	/	/	/	/	/	/	/	/
K00289	/	/	/	/	/	/	/	/	/	/	/	/	/	/	/	/	/	/	/	/	/	/	/	/	/	/	/	/	/	/	/	/	/	/	/	/	/	/	/	/	/	/	/	/	/	/	/	/	/
K00290	/	/	/	/	/	/	Y	Y	/	/	/	/	/	/	/	/	/	/	/	/	/	Y	/	/	/	/	/	/	/	/	Y	/	Y	Y	/	/	Y	/	/	/	/	/	/	/	/	/	/	/	Y
K00293	/	/	/	/	/	/	/	/	/	/	/	/	/	/	/	/	/	/	/	/	/	/	/	/	/	/	/	/	/	/	/	/	Y	/	/	/	/	/	/	/	/	/	/	/	/	/	/	/	/
K00294	Y	/	/	Y	/	/	/	/	/	/	/	/	/	/	/	/	/	Y	/	Y	/	/	/	/	Y	Y	/	/	/	Y	/	/	Y	/	/	/	Y	Y	Y	/	Y	/	/	Y	/	/	/	/	/
K00295	/	/	/	/	/	/	/	/	/	/	/	/	/	/	/	/	/	/	/	/	/	/	/	/	/	/	/	/	/	/	/	/	/	/	/	/	/	/	/	/	/	/	/	/	/	/	/	/	/
K00296	/	/	/	/	/	/	/	/	/	/	/	/	/	/	/	/	/	/	/	/	/	/	/	/	/	/	/	/	/	/	/	/	/	/	/	/	/	/	/	/	/	/	/	/	/	/	/	/	/
K00297	/	/	Y	/	Y	/	/	Y	Y	/	/	Y	Y	Y	Y	/	/	/	Y	/	Y	Y	Y	Y	/	/	Y	Y	/	/	/	Y	Y	Y	Y	Y	Y	/	/	Y	Y	/	Y	Y	Y	Y	Y	/	/
K00298	/	/	/	/	/	/	/	/	/	/	/	/	/	/	/	/	/	/	/	/	/	/	/	/	/	/	/	/	/	/	/	/	/	/	/	Y	/	/	/	/	/	/	Y	/	/	/	/	/	/
K00299	/	/	/	/	/	/	/	Y	/	/	/	/	/	/	/	/	/	/	/	/	Y	/	/	/	/	/	/	/	/	/	/	/	/	/	/	/	/	/	/	/	/	/	Y	/	/	/	/	/	/
K00301	/	/	/	/	/	/	/	/	/	/	/	/	/	/	/	/	/	/	/	/	/	/	/	/	/	/	/	/	/	/	/	/	/	/	/	/	/	/	/	/	/	/	/	/	/	/	/	/	/
K00302	Y	/	/	Y	/	Y	Y	/	/	Y	/	/	Y	/	Y	/	/	/	/	Y	/	/	/	/	/	/	/	/	Y	/	/	/	/	Y	/	Y	/	/	Y	/	/	/	/	/	Y	/	/	/	/
K00303	Y	/	/	Y	/	Y	Y	/	Y	/	Y	/	Y	/	/	/	/	Y	/	Y	/	/	/	Y	Y	Y	/	/	/	/	/	/	/	/	/	/	/	Y	Y	/	/	Y	/	/	/	Y	Y	/	/
K00304	/	/	/	/	/	/	/	/	/	/	/	/	/	/	/	/	/	/	/	/	/	/	/	/	/	/	/	/	/	/	/	/	/	/	/	/	/	/	/	/	/	/	/	/	/	/	/	/	/
K00305	/	/	/	/	/	/	/	/	/	/	/	/	/	/	/	/	/	/	/	/	/	/	/	/	/	/	/	/	/	/	/	/	/	/	/	/	/	/	/	/	/	/	/	/	/	/	/	/	/
K00306	/	/	/	/	/	/	/	/	/	/	/	/	/	/	/	/	/	/	/	/	/	/	/	/	/	/	/	/	/	/	/	/	/	/	/	/	/	/	/	/	/	/	/	/	/	/	/	/	/
K00307	/	/	/	/	/	/	/	/	/	/	/	/	/	/	/	/	/	/	/	/	/	/	/	/	/	/	/	/	/	/	/	/	/	/	/	/	/	/	/	/	/	/	/	/	/	/	/	/	/
K00308	/	/	/	/	/	/	/	/	/	/	/	/	/	/	/	/	/	/	/	/	/	/	/	/	/	/	/	/	/	/	/	/	/	/	/	/	/	/	/	/	/	/	/	/	/	/	/	/	/
K00310	/	/	/	/	/	/	/	/	/	/	/	/	/	/	/	/	/	/	/	/	/	/	/	/	/	/	/	/	/	/	/	/	/	/	/	/	/	/	/	/	/	/	/	/	/	/	/	/	/
K00311	/	/	/	/	/	/	/	/	/	/	/	/	/	/	/	/	/	/	/	/	/	/	/	/	/	/	/	/	/	/	/	/	/	/	/	/	/	/	/	Y	/	/	/	/	/	/	/	/	/
K00312	/	/	/	/	/	/	/	/	/	/	/	/	/	/	/	/	/	/	/	/	/	/	/	/	/	/	/	/	/	/	/	/	/	/	/	/	/	/	/	/	/	/	/	/	/	/	/	/	/
K00313	/	/	/	/	/	/	Y	Y	/	/	/	/	Y	Y	/	/	/	/	/	/	/	/	/	/	/	/	/	/	/	/	/	/	/	/	/	/	/	/	/	/	/	/	/	/	/	/	/	/	/
K00314	/	/	/	/	/	/	/	/	/	/	/	/	/	/	/	/	/	/	/	/	/	/	/	/	/	/	/	/	/	/	/	/	/	/	/	/	/	/	/	/	/	/	/	/	/	/	/	/	/
K00315	/	/	/	/	/	/	/	/	/	/	/	/	/	/	/	/	/	/	/	/	/	/	/	/	/	/	/	/	/	/	/	/	/	/	/	/	/	/	/	/	/	/	/	/	/	/	/	/	/
K00316	/	/	/	/	/	/	/	/	/	/	/	/	/	/	/	/	/	/	/	/	/	/	/	/	/	/	/	/	/	/	/	/	/	/	/	/	/	/	/	/	/	/	/	/	/	/	/	/	/
K00317	/	/	/	/	/	/	/	/	/	/	/	/	/	/	/	/	/	/	/	/	/	/	/	/	/	/	/	/	/	/	/	/	/	/	/	/	/	/	/	/	/	/	/	/	/	/	/	/	/
K00318	/	/	/	/	/	/	/	Y	/	/	/	/	/	/	/	/	/	/	/	/	Y	/	/	Y	/	/	/	/	/	/	/	/	/	/	Y	/	Y	/	/	/	/	/	/	Y	/	/	/	/	/
K00319	/	/	/	/	/	/	/	/	/	/	/	/	/	/	/	/	/	/	/	/	/	/	/	/	/	/	/	/	/	/	Y	/	/	/	/	/	/	/	/	/	/	/	/	/	/	/	/	/	/
K00320	/	/	/	/	/	/	/	/	/	/	/	/	/	/	/	/	/	/	/	/	/	/	/	/	/	/	/	/	/	/	Y	/	/	/	/	/	/	/	/	/	/	/	/	/	/	/	/	/	/
K00322	/	/	/	/	/	/	/	/	/	/	/	/	/	/	/	/	/	/	/	/	/	/	/	/	/	/	/	/	/	/	/	/	/	/	/	/	/	/	/	/	/	/	/	/	/	/	/	/	/
K00323	/	/	/	/	/	/	/	/	/	/	/	/	/	/	/	/	/	/	/	/	/	/	/	/	/	/	/	/	/	/	/	/	/	/	/	/	/	/	/	/	/	/	/	/	/	/	/	/	/
K00324	Y	/	/	/	/	/	/	Y	/	/	/	/	/	/	/	Y	/	/	/	/	Y	Y	/	/	/	Y	Y	Y	Y	/	/	/	Y	/	/	Y	/	/	Y	/	Y	/	Y	/	/	/	/	Y	/
K00325	/	/	/	/	/	/	/	Y	/	/	/	/	/	/	/	Y	/	/	/	/	Y	Y	/	/	/	Y	Y	Y	Y	/	/	/	Y	/	/	Y	/	/	/	/	Y	/	/	/	/	/	/	Y	/
K00326	/	/	/	/	/	/	/	/	/	/	/	/	/	/	/	/	/	/	/	/	/	Y	/	/	/	/	/	/	/	/	/	/	/	/	/	/	/	/	/	/	/	/	/	/	/	/	/	/	/
K00327	/	/	/	/	/	/	/	/	/	/	/	/	/	/	/	/	/	/	/	/	/	/	/	/	/	/	/	/	/	/	/	/	/	/	/	/	/	/	/	/	/	/	/	/	/	/	/	/	/
K00329	/	/	/	/	/	/	/	/	/	/	/	/	/	/	/	/	/	/	/	/	/	/	/	/	/	/	/	/	/	/	/	/	/	/	/	/	/	/	/	/	/	/	/	/	/	/	/	/	/
K00330	/	/	Y	/	/	/	/	Y	Y	/	/	Y	Y	Y	/	/	Y	/	Y	/	Y	/	Y	Y	/	/	Y	/	/	/	/	/	/	/	Y	/	/	/	/	Y	/	/	Y	/	/	Y	/	Y	/
K00331	/	/	Y	/	/	/	/	Y	Y	/	/	Y	Y	Y	/	/	/	/	/	/	Y	/	Y	Y	/	/	Y	/	/	/	/	/	/	/	Y	/	/	/	/	Y	/	Y	Y	/	/	/	/	Y	/
K00332	/	/	Y	/	/	Y	/	Y	Y	/	/	Y	Y	/	/	/	/	/	/	/	Y	/	Y	/	/	/	Y	/	/	/	/	/	/	/	Y	/	/	/	/	Y	/	Y	Y	/	/	Y	/	Y	/
K00333	/	/	Y	/	/	Y	/	Y	Y	/	/	Y	/	Y	/	/	Y	/	/	/	Y	/	Y	/	/	/	Y	/	/	/	/	/	/	/	Y	/	/	/	/	Y	/	Y	Y	/	/	Y	/	/	/
K00334	Y	Y	Y	Y	Y	Y	/	Y	Y	Y	Y	Y	Y	Y	Y	/	Y	Y	Y	Y	Y	Y	Y	Y	Y	Y	Y	Y	Y	Y	Y	Y	Y	Y	Y	Y	Y	Y	Y	Y	Y	Y	/	Y	Y	/	Y	Y	Y
K00335	/	Y	Y	Y	Y	Y	/	/	/	Y	/	Y	Y	Y	Y	/	Y	Y	Y	Y	Y	/	Y	Y	Y	/	Y	Y	Y	Y	Y	Y	Y	Y	Y	Y	/	Y	Y	Y	Y	Y	Y	Y	Y	/	Y	/	Y
K00336	/	/	Y	Y	Y	/	Y	Y	Y	Y	/	Y	Y	Y	Y	/	/	Y	Y	/	Y	Y	Y	Y	Y	/	Y	Y	Y	/	/	Y	Y	Y	/	/	/	Y	Y	Y	Y	Y	Y	Y	Y	/	Y	Y	Y
K00337	/	/	Y	/	/	Y	/	Y	Y	/	Y	Y	Y	Y	/	/	Y	/	/	Y	Y	/	Y	Y	/	/	Y	/	/	Y	/	/	/	/	/	/	/	/	/	Y	/	Y	Y	/	/	Y	/	/	/
K00338	/	/	Y	/	/	/	/	Y	Y	/	/	Y	Y	/	/	/	/	/	/	/	Y	/	Y	/	/	/	Y	/	/	/	/	/	/	/	Y	/	/	/	/	Y	/	/	Y	/	/	/	/	Y	/
K00339	/	/	Y	/	/	Y	/	Y	Y	/	/	Y	Y	Y	/	/	/	/	Y	/	Y	/	Y	Y	/	/	Y	/	/	/	/	/	/	/	Y	/	/	/	/	Y	/	/	Y	/	/	Y	/	/	/
K00340	/	/	Y	/	/	Y	/	Y	Y	/	/	Y	Y	Y	/	/	Y	/	Y	/	Y	/	Y	Y	/	/	Y	/	/	/	/	/	/	/	Y	/	/	/	/	Y	/	/	Y	/	/	/	/	/	/
K00341	/	/	Y	/	/	/	/	Y	Y	/	/	Y	Y	Y	/	/	Y	/	Y	/	/	/	Y	Y	/	/	Y	/	/	/	/	/	/	/	/	/	/	/	/	Y	/	/	/	/	/	/	/	/	/
K00342	/	/	Y	/	/	Y	/	Y	/	/	/	Y	Y	Y	/	/	Y	/	/	/	Y	/	Y	Y	/	/	Y	/	/	/	/	/	/	/	Y	/	/	/	/	Y	/	/	Y	/	/	/	/	/	/
K00343	/	/	Y	/	/	/	/	/	Y	/	/	Y	Y	Y	/	/	Y	/	/	/	/	/	Y	Y	/	/	Y	/	/	/	/	/	/	/	Y	/	/	/	/	Y	/	/	Y	/	/	/	/	Y	/
K00344	/	/	/	/	/	/	/	/	/	/	/	/	Y	Y	/	/	Y	/	Y	Y	Y	/	/	Y	/	/	Y	/	/	/	/	/	/	/	/	/	/	/	/	/	Y	/	Y	/	/	/	/	/	/
K00346	/	/	/	/	/	/	/	/	/	/	/	/	/	/	/	/	/	/	/	/	/	Y	/	/	/	/	/	/	/	/	/	/	Y	/	/	/	Y	/	/	/	Y	/	/	Y	/	/	/	/	/
K00347	/	/	/	/	/	/	/	/	/	/	/	/	/	/	/	/	/	/	/	/	/	Y	/	/	/	Y	/	/	/	/	/	/	Y	/	/	Y	Y	/	/	/	Y	Y	/	Y	/	/	/	/	Y
K00348	/	/	/	/	/	/	/	/	/	/	/	/	/	/	/	Y	/	/	/	/	/	Y	/	/	/	Y	/	/	/	/	/	/	Y	/	/	Y	Y	/	/	/	Y	Y	/	Y	/	/	/	/	Y
K00349	/	/	/	/	/	/	/	/	/	/	/	/	/	/	/	Y	/	/	/	/	/	Y	/	/	/	Y	/	/	/	/	/	/	Y	/	/	Y	Y	/	/	/	Y	Y	/	Y	/	/	/	/	Y
K00350	/	/	/	/	/	/	/	/	/	/	/	/	/	/	/	Y	/	/	/	/	/	Y	/	/	/	Y	/	/	/	/	/	/	Y	/	/	Y	Y	/	/	/	Y	Y	/	Y	/	/	/	/	Y
K00351	/	/	/	/	/	/	/	/	/	/	/	/	/	/	/	Y	/	/	/	/	/	Y	/	/	/	Y	/	/	/	/	/	/	Y	/	/	Y	Y	/	/	/	Y	Y	/	Y	/	/	/	/	Y
K00354	/	Y	Y	/	/	/	/	Y	Y	/	/	/	/	/	/	/	/	/	/	Y	/	/	/	/	/	Y	/	/	Y	Y	/	/	/	/	/	Y	/	/	Y	Y	/	/	/	/	/	/	Y	/	Y
K00355	/	/	/	/	/	/	/	Y	/	/	/	/	/	Y	Y	/	/	/	/	/	/	/	/	/	/	/	Y	/	/	/	/	/	/	/	/	/	/	/	/	/	/	/	/	/	/	/	/	/	/
K00356	/	/	/	/	/	/	/	/	/	/	/	/	/	/	/	/	/	/	/	/	/	/	/	/	/	/	/	/	/	/	/	/	/	/	/	/	/	/	/	/	/	/	/	/	/	/	/	/	/
K00357	/	/	/	/	/	/	/	/	/	/	/	/	/	/	/	/	/	/	/	/	/	/	/	/	/	/	/	/	/	/	/	/	/	/	/	/	/	/	/	/	/	/	/	/	/	/	/	/	/
K00360	/	/	/	/	/	/	/	/	/	/	/	/	/	/	/	/	/	/	/	/	/	/	/	/	/	/	/	/	/	/	/	/	/	/	/	/	/	/	/	/	/	/	/	/	/	/	/	/	/
K00362	/	Y	/	/	/	/	Y	/	/	/	/	/	/	Y	/	/	Y	/	Y	/	/	/	Y	/	/	/	/	/	/	/	/	/	/	/	/	Y	/	/	/	/	/	/	/	/	Y	/	/	/	Y
K00363	/	/	/	/	/	/	/	/	/	/	/	/	/	/	/	/	/	/	/	/	/	/	/	/	/	/	/	/	/	/	/	/	/	/	/	/	/	/	/	/	Y	/	/	/	/	/	/	/	/
K00364	/	/	/	/	/	/	/	/	/	/	/	/	/	/	/	/	/	/	/	/	/	/	/	/	/	/	/	/	/	/	/	/	/	/	/	/	/	/	/	/	/	/	/	Y	/	/	/	/	/
K00365	/	/	/	/	/	/	/	/	/	/	/	/	/	/	/	/	/	/	/	/	/	/	/	/	/	/	/	/	/	/	/	/	/	/	/	/	/	/	/	/	/	/	/	/	/	/	/	/	/
K00366	/	/	/	/	/	/	/	/	/	/	/	/	/	/	/	/	/	/	/	/	/	/	/	/	/	/	/	/	/	/	/	/	/	/	/	/	/	/	/	/	/	/	/	/	/	/	/	Y	/
K00367	/	/	/	/	/	/	/	/	/	/	/	/	/	/	/	/	/	/	/	/	/	/	/	/	/	/	/	/	/	/	/	/	/	/	/	/	/	/	/	/	/	/	/	/	/	/	/	/	/
K00368	/	/	/	/	/	/	/	Y	/	/	/	/	/	/	/	/	/	/	/	/	/	/	/	Y	/	/	/	/	/	/	/	/	/	/	/	/	/	/	/	/	/	/	Y	/	/	/	/	Y	/
K00370	/	/	/	/	/	/	/	/	/	/	/	/	/	/	/	/	/	/	/	/	/	Y	/	/	/	/	/	/	/	/	/	/	/	/	/	/	/	/	/	/	/	/	/	/	/	/	/	/	/
K00371	/	/	/	/	/	/	/	/	/	/	/	/	/	/	/	/	/	/	/	/	/	Y	/	Y	/	/	/	/	/	/	/	/	/	/	/	/	/	/	/	/	/	/	/	/	/	/	/	/	/
K00372	/	/	/	/	/	/	/	/	/	/	/	/	/	/	/	/	/	/	/	/	/	/	/	/	/	/	/	/	/	/	/	/	/	/	/	/	/	/	/	/	/	/	/	/	/	/	/	/	/
K00373	/	/	/	/	/	/	/	/	/	/	/	/	/	/	/	/	/	/	/	/	/	Y	/	Y	/	/	/	/	/	/	/	/	/	/	/	/	/	/	/	/	/	/	/	/	/	/	/	/	/
K00374	/	/	/	/	/	/	/	/	/	/	/	/	Y	/	/	/	/	/	/	/	/	Y	Y	Y	/	/	/	/	/	/	/	/	/	/	/	/	/	/	/	Y	/	/	/	/	/	/	/	/	/
K00375	/	/	/	/	Y	/	Y	Y	/	/	/	/	/	/	/	/	/	/	/	Y	Y	/	/	/	/	/	/	/	/	Y	/	Y	/	Y	/	Y	/	/	Y	/	/	/	/	/	/	/	/	/	/
K00376	/	/	/	/	/	/	/	/	/	/	/	/	/	/	/	/	/	/	/	/	/	/	/	/	/	/	/	/	/	/	/	/	/	/	/	/	/	/	/	/	/	/	/	/	/	/	/	/	/
K00380	/	/	/	/	/	/	/	/	/	/	/	/	/	/	/	/	/	/	/	/	/	Y	/	/	/	/	/	/	/	/	/	/	/	/	/	/	/	/	/	/	/	/	/	/	/	/	/	/	/
K00381	/	/	/	/	/	/	/	/	/	/	/	/	/	/	/	/	/	/	/	/	/	/	/	/	/	/	/	/	/	/	/	/	/	/	/	/	/	/	/	/	/	/	/	/	/	/	/	/	/
K00382	Y	/	Y	Y	/	Y	/	Y	/	Y	/	Y	Y	Y	/	/	Y	Y	Y	Y	Y	Y	Y	Y	Y	Y	Y	Y	Y	/	Y	Y	Y	Y	/	Y	Y	Y	Y	Y	Y	Y	Y	Y	Y	Y	/	Y	Y
K00383	/	/	/	/	/	/	/	/	/	/	/	/	/	/	/	/	/	/	/	/	/	/	/	/	/	/	/	/	/	/	/	/	/	/	/	/	/	/	/	/	/	/	/	/	/	/	/	/	/
K00384	Y	Y	Y	Y	Y	Y	Y	/	Y	Y	Y	Y	Y	Y	Y	Y	Y	Y	Y	Y	Y	Y	Y	Y	Y	Y	Y	Y	Y	Y	Y	Y	Y	Y	Y	Y	Y	Y	Y	Y	Y	Y	Y	Y	/	/	Y	Y	Y
K00385	/	/	/	/	/	/	/	/	/	/	/	/	/	/	/	/	/	/	/	/	/	/	/	/	/	/	/	/	/	/	/	/	/	/	/	/	/	/	/	/	/	/	/	/	/	/	/	/	/
K00387	/	/	/	/	/	/	/	/	/	/	/	/	/	/	/	/	/	/	/	/	/	/	/	/	/	/	/	/	/	/	/	/	/	/	/	/	/	/	/	/	/	/	Y	/	/	/	/	/	/
K00389	/	/	Y	/	/	/	/	/	/	/	/	/	Y	/	/	/	/	/	/	/	/	Y	/	/	/	/	/	/	/	/	/	/	/	/	/	/	/	/	/	/	/	/	/	/	/	/	/	/	/
K00390	/	/	/	/	/	/	/	/	/	Y	/	Y	/	/	/	/	Y	/	/	/	Y	Y	/	/	/	/	/	/	/	/	/	/	/	/	/	/	/	/	/	Y	Y	/	/	/	/	/	/	Y	/
K00392	/	/	/	/	/	/	/	/	/	/	/	Y	/	/	/	/	/	/	/	/	/	/	/	/	/	/	/	/	/	/	/	/	/	/	/	/	/	/	/	/	Y	/	/	/	/	/	/	/	/
K00394	/	/	/	/	/	/	/	/	/	/	/	/	/	/	/	/	/	/	/	/	/	/	Y	/	/	/	/	/	/	/	/	/	/	/	/	/	/	/	/	Y	/	/	/	/	/	/	/	/	/
K00395	/	/	/	/	/	/	/	/	/	/	/	/	Y	/	/	/	/	/	/	/	/	/	Y	/	/	/	/	/	/	/	/	/	/	/	/	/	/	/	/	Y	/	/	/	/	/	/	/	/	/
K00399	/	/	/	/	/	/	/	/	/	/	/	/	/	/	/	/	/	/	/	/	/	/	/	/	/	/	/	/	/	/	Y	/	/	/	/	/	/	/	/	/	/	/	/	/	/	/	/	/	/
K00400	/	/	/	/	/	/	/	/	/	/	/	/	/	/	/	/	/	/	/	/	/	/	/	/	/	/	/	/	/	/	Y	/	/	/	/	/	/	/	/	/	/	/	/	/	/	/	/	/	/
K00401	/	/	/	/	/	/	/	/	/	/	/	/	/	/	/	/	/	/	/	/	/	/	/	/	/	/	/	/	/	/	Y	/	/	/	/	/	/	/	/	/	/	/	/	/	/	/	/	/	/
K00402	/	/	/	/	/	/	/	/	/	/	/	/	/	/	/	/	/	/	/	/	/	/	/	/	/	/	/	/	/	/	Y	/	/	/	/	/	/	/	/	/	/	/	/	/	/	/	/	/	/
K00404	/	/	/	/	/	/	/	/	/	/	/	Y	Y	/	/	/	/	/	/	/	/	/	/	/	/	/	/	/	/	/	/	/	/	/	/	/	/	/	/	/	/	/	/	/	/	/	/	/	/
K00405	/	/	/	/	/	/	/	/	/	/	/	Y	Y	/	/	/	/	/	/	/	/	/	/	/	/	/	/	/	/	/	/	/	/	/	/	/	/	/	/	/	/	/	/	/	/	/	/	/	/
K00406	/	/	/	/	/	/	/	/	/	/	/	/	/	/	/	/	/	/	/	/	/	/	/	/	/	/	/	/	/	/	/	/	/	/	/	/	/	/	/	/	/	/	/	/	/	/	/	/	/
K00407	/	/	/	/	/	/	/	/	/	/	/	/	/	/	/	/	/	/	/	/	/	/	/	/	/	/	/	/	/	/	/	/	/	/	/	/	/	/	/	/	/	/	/	/	/	/	/	/	/
K00408	/	/	/	/	/	/	/	/	/	/	/	/	/	/	/	/	/	/	/	/	/	/	/	/	/	/	/	/	/	/	/	/	/	/	/	/	/	/	/	/	/	/	/	/	/	/	/	/	/
K00410	/	/	/	/	/	/	/	/	/	/	/	/	/	/	/	/	/	/	/	/	/	/	/	/	/	/	/	/	/	/	/	/	/	/	/	/	/	/	/	/	/	/	/	/	/	/	/	/	/
K00411	/	/	/	/	/	/	/	/	/	/	/	/	/	/	/	/	/	/	/	/	/	/	/	/	/	/	/	/	/	/	/	/	/	/	/	/	/	/	/	/	/	/	/	/	/	/	/	/	/
K00412	/	/	/	/	/	/	/	/	/	/	/	/	/	/	/	/	/	/	/	/	/	/	/	/	/	/	Y	/	/	/	/	/	/	/	/	/	/	/	/	/	/	/	/	/	/	/	/	/	/
K00413	/	/	/	/	/	/	/	/	/	/	/	/	/	/	/	/	/	/	/	/	/	/	/	/	/	/	/	/	/	/	/	/	/	/	/	/	/	/	/	/	/	/	/	/	/	/	/	/	/
K00414	/	/	/	/	/	/	/	/	/	/	/	/	/	/	/	/	/	/	/	/	/	/	/	/	/	/	/	/	/	/	/	/	/	/	/	/	/	/	/	/	/	/	/	/	/	/	/	/	/
K00415	/	/	/	/	/	/	/	/	/	/	/	/	/	/	/	/	/	/	/	/	/	/	/	/	/	/	/	/	/	/	/	/	/	/	/	/	/	/	/	/	/	/	/	/	/	/	/	/	/
K00416	/	/	/	/	/	/	/	/	/	/	/	/	/	/	/	/	/	/	/	/	/	/	/	/	/	/	/	/	/	/	/	/	/	/	/	/	/	/	/	/	/	/	/	/	/	/	/	/	/
K00417	/	/	/	/	/	/	/	/	/	/	/	/	/	/	/	/	/	/	/	/	/	/	/	/	/	/	/	/	/	/	/	/	/	/	/	/	/	/	/	/	/	/	/	/	/	/	/	/	/
K00418	/	/	/	/	/	/	/	/	/	/	/	/	/	/	/	/	/	/	/	/	/	/	/	/	/	/	/	/	/	/	/	/	/	/	/	/	/	/	/	/	/	/	/	/	/	/	/	/	/
K00419	/	/	/	/	/	/	/	/	/	/	/	/	/	/	/	/	/	/	/	/	/	/	/	/	/	/	/	/	/	/	/	/	/	/	/	/	/	/	/	/	/	/	/	/	/	/	/	/	/
K00420	/	/	/	/	/	/	/	/	/	/	/	/	/	/	/	/	/	/	/	/	/	/	/	/	/	/	/	/	/	/	/	/	/	/	/	/	/	/	/	/	/	/	/	/	/	/	/	/	/
K00422	/	/	/	/	/	/	/	/	/	/	/	/	/	/	/	/	/	/	/	/	/	/	/	/	/	/	/	/	/	/	/	/	/	/	/	/	/	/	/	/	/	/	/	/	/	/	/	/	/
K00423	/	/	/	/	/	/	/	/	/	/	/	/	/	/	/	/	/	/	/	/	/	/	/	/	/	/	/	/	/	/	/	/	/	/	/	/	/	/	/	/	/	/	/	/	/	/	/	/	/
K00425	/	/	/	/	/	/	/	Y	/	/	/	/	Y	/	/	/	/	/	/	/	Y	Y	Y	Y	/	/	/	/	/	/	/	/	Y	/	/	/	Y	/	/	/	Y	/	Y	Y	/	/	/	/	/
K00426	/	/	/	/	/	/	/	Y	Y	/	/	/	Y	/	/	/	/	/	/	/	/	Y	Y	Y	/	/	/	/	/	/	/	/	Y	/	/	/	Y	/	/	Y	Y	/	Y	Y	/	/	/	Y	/
K00427	/	/	/	/	/	/	/	/	/	/	/	/	/	/	/	/	/	/	/	/	/	/	/	/	/	/	/	/	/	/	/	/	/	/	/	/	/	/	/	/	/	/	/	/	/	/	/	/	/
K00428	/	/	/	/	/	/	/	/	/	/	/	/	/	Y	/	/	/	/	/	/	/	/	Y	/	/	/	Y	/	/	/	/	/	/	/	/	/	/	/	/	/	/	/	/	/	/	/	/	Y	/
K00430	/	/	/	/	/	/	/	/	/	/	/	/	/	/	/	/	/	/	/	/	/	/	/	/	/	/	/	/	/	/	/	/	/	/	/	/	/	/	/	/	/	/	/	/	/	/	/	/	/
K00431	/	/	/	/	/	/	/	/	/	/	/	/	/	/	/	/	/	/	/	/	/	/	/	/	/	/	/	/	/	/	/	/	/	/	/	/	/	/	/	/	/	/	/	/	/	/	/	/	/
K00432	/	/	/	/	/	/	/	Y	/	/	/	/	/	/	/	Y	/	/	/	/	/	Y	/	/	/	/	Y	/	/	/	/	/	Y	/	/	Y	Y	/	Y	/	/	Y	Y	Y	/	/	/	/	Y
K00433	/	/	/	/	/	/	/	/	/	/	/	/	/	/	/	/	/	/	/	/	/	/	/	/	/	/	Y	/	/	/	/	/	/	/	/	/	/	/	/	/	/	/	/	/	/	/	/	/	/
K00434	/	/	/	/	/	/	/	/	/	/	/	/	/	/	/	/	/	/	/	/	/	/	/	/	/	/	/	/	/	/	/	/	/	/	/	/	/	/	/	/	/	/	/	/	/	/	/	/	/
K00436	/	Y	/	Y	/	/	/	/	Y	Y	Y	/	/	Y	/	/	Y	/	/	Y	/	/	/	/	/	Y	/	/	/	Y	Y	Y	/	/	Y	/	/	/	/	/	Y	/	/	/	Y	/	/	/	/
K00437	/	/	/	/	/	/	/	/	/	/	/	/	Y	/	/	/	/	/	/	/	/	/	Y	/	/	/	/	/	/	/	/	/	/	/	/	/	/	/	/	Y	/	/	/	/	/	/	/	/	/
K00440	/	/	/	/	/	/	/	/	/	/	/	/	/	/	/	/	/	/	/	/	/	/	/	/	/	/	/	/	/	/	/	/	/	/	/	/	/	/	/	/	/	/	/	/	/	/	/	/	/
K00441	/	/	/	/	/	/	/	/	/	/	/	/	/	/	/	/	/	/	/	/	/	/	/	/	/	/	/	/	/	/	Y	/	/	/	/	/	/	/	/	/	/	/	/	/	/	/	/	/	/
K00442	/	/	/	/	/	/	/	/	/	/	/	/	/	/	/	/	/	/	/	/	/	/	/	/	/	/	/	/	/	/	/	/	/	/	/	/	/	/	/	/	/	/	/	/	/	/	/	/	/
K00443	/	/	/	/	/	/	/	/	/	/	/	/	/	/	/	/	/	/	/	/	/	/	/	/	/	/	/	/	/	/	/	/	/	/	/	/	/	/	/	/	/	/	/	/	/	/	/	/	/
K00444	/	/	/	/	/	/	/	/	/	/	/	/	/	/	/	/	/	/	/	/	/	/	/	/	/	/	/	/	/	/	/	/	/	/	/	/	/	/	/	/	/	/	/	/	/	/	/	/	/
K00445	/	/	/	/	/	/	/	/	/	/	/	/	/	/	/	/	/	/	/	/	/	/	/	/	/	/	/	/	/	/	/	/	/	/	/	/	/	/	/	/	/	/	/	/	/	/	/	/	/
K00446	/	/	/	/	/	/	/	/	/	/	/	/	/	/	/	/	/	/	/	/	/	/	/	/	/	/	/	/	/	/	/	/	/	/	/	/	/	/	/	/	/	/	Y	/	/	/	/	/	/
K00448	/	/	/	/	/	/	/	/	/	/	/	/	/	/	/	/	/	/	/	/	/	/	/	/	/	/	/	/	/	/	/	/	/	/	/	/	/	/	/	/	/	/	/	/	/	/	/	/	/
K00449	/	/	/	/	/	/	/	/	/	/	/	/	/	/	/	/	/	/	/	/	/	/	/	/	/	/	/	/	/	/	/	/	/	/	/	/	/	/	/	/	/	/	/	/	/	/	/	/	/
K00450	/	/	/	/	/	/	/	/	/	/	/	/	/	/	/	/	/	/	/	/	/	/	/	/	/	/	/	/	/	/	/	/	/	/	/	/	/	/	/	/	/	/	/	/	/	/	/	/	/
K00451	/	/	/	/	/	/	/	/	/	/	/	/	/	/	/	/	/	/	/	/	/	/	/	/	/	/	/	/	/	/	/	/	/	/	/	/	/	/	/	/	/	/	/	/	/	/	/	/	/
K00452	/	/	/	/	/	/	/	/	/	/	/	/	/	/	/	/	/	/	/	/	/	/	/	/	/	/	/	/	/	/	/	/	/	/	/	/	/	/	/	/	/	/	/	/	/	/	/	/	/
K00453	/	/	/	/	/	/	/	/	/	/	/	/	/	/	/	/	/	/	/	/	/	/	/	/	/	/	/	/	/	/	/	/	/	/	/	/	/	/	/	/	/	/	/	/	/	/	/	/	/
K00454	/	/	/	/	/	/	/	/	/	/	/	/	/	/	/	/	/	/	/	/	/	/	/	/	/	/	/	/	/	/	/	/	/	/	/	/	/	/	/	/	/	/	/	/	/	/	/	/	/
K00455	/	/	/	/	/	/	/	/	/	/	/	/	/	/	/	/	/	/	/	/	/	/	/	/	/	/	/	/	/	/	/	/	/	/	/	/	/	/	/	/	/	/	/	/	/	/	/	/	/
K00456	/	/	/	/	/	/	/	/	/	/	/	/	/	/	/	/	/	/	/	/	/	/	/	/	/	/	/	/	/	/	/	/	/	/	/	/	/	/	/	/	/	/	/	/	/	/	/	/	/
K00457	/	Y	/	/	/	/	/	/	/	/	/	/	/	/	/	/	/	/	/	/	/	/	/	/	/	/	/	/	/	/	/	/	/	/	/	/	/	/	/	/	/	/	/	/	/	/	/	/	/
K00458	/	/	/	/	/	/	/	/	/	/	/	/	/	/	/	/	/	/	/	/	/	/	/	/	/	/	/	/	/	/	/	/	/	/	/	/	/	/	/	/	/	/	/	/	/	/	/	/	/
K00459	/	Y	Y	Y	/	/	Y	/	/	/	Y	Y	/	Y	/	/	/	Y	/	Y	/	/	Y	/	/	/	/	/	/	/	/	/	/	/	/	/	/	/	/	Y	Y	/	Y	Y	/	/	Y	Y	Y
K00460	/	/	/	/	/	/	/	/	/	/	/	/	/	/	/	/	/	/	/	/	/	/	/	/	/	/	/	/	/	/	/	/	/	/	/	/	/	/	/	/	/	/	/	/	/	/	/	/	/
K00461	/	/	/	/	/	/	/	/	/	/	/	/	/	/	/	/	/	/	/	/	/	/	/	/	/	/	/	/	/	/	/	/	/	/	/	/	/	/	/	/	/	/	/	/	/	/	/	/	/
K00462	/	/	/	/	/	/	/	/	/	/	/	/	/	/	/	/	/	/	/	/	/	/	/	/	/	/	/	/	/	/	/	/	/	/	/	/	/	/	/	/	/	/	/	/	/	/	/	/	/
K00463	/	/	/	/	/	/	/	/	/	/	/	/	/	/	/	/	/	/	/	/	/	/	/	/	/	/	/	/	/	/	/	/	/	/	/	/	/	/	/	/	/	/	/	/	/	/	/	/	/
K00464	/	/	/	/	/	/	/	/	/	/	/	/	/	/	/	/	/	/	/	/	/	/	/	/	/	/	/	/	/	/	/	/	/	/	/	/	/	/	/	/	/	/	/	/	/	/	/	/	/
K00466	/	/	/	/	/	/	/	/	/	/	/	/	/	/	/	/	/	/	/	/	/	/	/	/	/	/	/	/	/	/	/	/	/	/	/	/	/	/	/	/	/	/	/	/	/	/	/	/	/
K00467	/	/	/	/	/	/	/	/	/	/	/	/	/	/	/	/	/	/	/	/	/	/	/	/	/	/	/	/	/	/	/	/	/	/	/	/	/	/	/	/	/	/	/	/	/	/	/	/	/
K00469	/	/	/	/	/	/	/	/	/	/	/	/	/	/	/	/	/	/	/	/	/	/	/	/	/	/	/	/	/	/	/	/	/	/	/	/	/	/	/	/	/	/	/	/	/	/	/	/	/
K00471	/	/	/	/	/	/	/	/	/	/	/	/	/	/	/	/	/	/	/	/	/	/	/	/	/	/	/	/	/	/	/	/	/	/	/	/	/	/	/	/	/	/	/	/	/	/	/	/	/
K00472	/	/	/	/	/	/	/	/	/	/	/	/	/	/	/	/	/	/	/	/	/	/	/	/	/	/	/	/	/	/	/	/	/	/	/	/	/	/	/	/	/	/	/	/	/	/	/	/	/
K00473	/	/	/	/	/	/	/	/	/	/	/	/	/	/	/	/	/	/	/	/	/	/	/	/	/	/	/	/	/	/	/	/	/	/	/	/	/	/	/	/	/	/	/	/	/	/	/	/	/
K00474	/	/	/	/	/	/	/	/	/	/	/	/	/	/	/	/	/	/	/	/	/	/	/	/	/	/	/	/	/	/	/	/	/	/	/	/	/	/	/	/	/	/	/	/	/	/	/	/	/
K00475	/	/	/	/	/	/	/	/	/	/	/	/	/	/	/	/	/	/	/	/	/	/	/	/	/	/	/	/	/	/	/	/	/	/	/	/	/	/	/	/	/	/	/	/	/	/	/	/	/
K00476	/	/	/	/	/	/	/	/	/	/	/	/	/	/	/	/	/	/	/	/	/	/	/	/	/	/	/	/	/	/	/	/	/	/	/	/	/	/	/	/	/	/	/	/	/	/	/	/	/
K00477	/	/	/	/	/	/	/	/	/	/	/	/	/	/	/	/	/	/	/	/	/	/	/	Y	/	/	/	/	/	/	/	/	/	/	/	/	/	/	/	/	/	/	/	/	/	/	/	Y	/
K00478	/	/	/	/	/	/	/	/	/	/	/	/	/	/	/	/	/	/	/	/	/	/	/	/	/	/	/	/	/	/	/	/	/	/	/	/	/	/	/	/	/	/	/	/	/	/	/	/	/
K00479	/	/	/	/	/	/	/	/	/	/	/	/	/	/	/	/	/	/	/	/	/	/	/	/	/	/	/	/	/	/	/	/	/	/	/	/	/	/	/	/	/	/	/	/	/	/	/	/	/
K00480	/	/	/	/	/	/	/	/	/	/	/	/	/	/	/	/	/	/	/	/	/	/	/	/	/	/	/	/	/	/	/	/	/	/	/	/	/	/	/	/	/	/	/	/	/	/	/	/	/
K00481	/	/	/	/	/	/	/	/	/	/	/	/	/	/	/	/	/	/	/	/	/	/	/	/	/	/	/	/	/	/	/	/	/	/	/	/	/	/	/	/	/	/	/	/	/	/	/	/	/
K00483	/	/	/	/	/	/	/	/	/	/	/	/	/	/	/	/	/	/	/	/	/	/	/	/	/	/	/	/	/	/	/	/	/	/	/	/	/	/	/	/	/	/	/	/	/	/	/	/	/
K00484	/	/	/	/	/	/	/	/	/	/	/	/	/	/	/	/	/	/	/	/	/	/	/	/	/	/	/	/	/	/	/	/	/	/	/	/	/	/	/	/	/	/	/	/	/	/	/	/	/
K00485	/	/	/	/	/	/	/	/	/	/	/	/	/	/	/	/	/	/	/	/	/	/	/	/	/	/	/	/	/	/	/	/	/	/	/	/	/	/	/	/	/	/	/	/	/	/	/	/	/
K00486	/	/	/	/	/	/	/	/	/	/	/	/	/	/	/	/	/	/	/	/	/	/	/	/	/	/	/	/	/	/	/	/	/	/	/	/	/	/	/	/	/	/	/	/	/	/	/	/	/
K00487	/	/	/	/	/	/	/	/	/	/	/	/	/	/	/	/	/	/	/	/	/	/	/	/	/	/	/	/	/	/	/	/	/	/	/	/	/	/	/	/	/	/	/	/	/	/	/	/	/
K00488	/	/	/	/	/	/	/	/	/	/	/	/	/	/	/	/	/	/	/	/	/	/	/	/	/	/	/	/	/	/	/	/	/	/	/	/	/	/	/	/	/	/	/	/	/	/	/	/	/
K00489	/	/	/	/	/	/	/	/	/	/	/	/	/	/	/	/	/	/	/	/	/	/	/	/	/	/	/	/	/	/	/	/	/	/	/	/	/	/	/	/	/	/	/	/	/	/	/	/	/
K00490	/	/	/	/	/	/	/	/	/	/	/	/	/	/	/	/	/	/	/	/	/	/	/	/	/	/	/	/	/	/	/	/	/	/	/	/	/	/	/	/	/	/	/	/	/	/	/	/	/
K00491	/	/	/	/	/	/	/	/	/	/	/	/	/	/	/	/	/	/	/	/	/	/	/	/	/	/	/	/	/	/	/	/	/	/	/	/	/	/	/	/	/	/	/	/	/	/	/	/	/
K00493	/	/	/	/	/	/	/	/	/	/	/	/	/	/	/	/	/	/	/	/	/	/	/	/	/	/	/	/	/	/	/	/	/	/	/	/	/	/	/	/	/	/	/	/	/	/	/	/	/
K00494	/	/	/	/	/	/	/	/	/	/	/	/	/	/	/	/	/	/	/	/	/	/	/	/	/	/	/	/	/	/	/	/	/	/	/	/	/	/	/	/	/	/	/	/	/	/	/	/	/
K00496	/	/	/	/	/	/	/	/	/	/	/	/	/	/	/	/	/	/	/	/	/	/	/	/	/	/	/	/	/	/	/	/	/	/	/	/	/	/	/	/	/	/	/	/	/	/	/	/	/
K00497	/	/	/	/	/	/	/	/	/	/	/	/	/	/	/	/	/	/	/	/	/	/	/	/	/	/	/	/	/	/	/	/	/	/	/	/	/	/	/	/	/	/	/	/	/	/	/	/	/
K00498	/	/	/	/	/	/	/	/	/	/	/	/	/	/	/	/	/	/	/	/	/	/	/	/	/	/	/	/	/	/	/	/	/	/	/	/	/	/	/	/	/	/	/	/	/	/	/	/	/
K00499	/	/	/	/	/	/	/	/	/	/	/	/	/	/	/	/	/	/	/	/	/	/	/	/	/	/	/	/	/	/	/	/	/	/	/	/	/	/	/	/	/	/	/	/	/	/	/	/	/
K00500	/	/	/	/	/	/	/	/	/	/	/	/	/	/	/	/	/	/	/	/	/	/	/	/	/	/	/	/	/	/	/	/	/	/	/	/	/	/	/	/	/	/	/	/	/	/	/	/	/
K00501	/	/	/	/	/	/	/	/	/	/	/	/	/	/	/	/	/	/	/	/	/	/	/	/	/	/	/	/	/	/	/	/	/	/	/	/	/	/	/	/	/	/	/	/	/	/	/	/	/
K00502	/	/	/	/	/	/	/	/	/	/	/	/	/	/	/	/	/	/	/	/	/	/	/	/	/	/	/	/	/	/	/	/	/	/	/	/	/	/	/	/	/	/	/	/	/	/	/	/	/
K00503	/	/	/	/	/	/	/	/	/	/	/	/	/	/	/	/	/	/	/	/	/	/	/	/	/	/	/	/	/	/	/	/	/	/	/	/	/	/	/	/	/	/	/	/	/	/	/	/	/
K00504	/	/	/	/	/	/	/	/	/	/	/	/	/	/	/	/	/	/	/	/	/	/	/	/	/	/	/	/	/	/	/	/	/	/	/	/	/	/	/	/	/	/	/	/	/	/	/	/	/
K00505	/	/	/	/	/	/	/	/	/	/	/	/	/	/	/	/	/	/	/	/	/	/	/	/	/	/	/	/	/	/	/	/	/	/	/	/	/	/	/	/	/	/	/	/	/	/	/	/	/
K00506	/	/	/	/	/	/	/	/	/	/	/	/	/	/	/	/	/	/	/	/	/	/	/	/	/	/	/	/	/	/	/	/	/	/	/	/	/	/	/	/	/	/	/	/	/	/	/	/	/
K00507	/	/	/	/	/	/	/	/	/	/	/	/	/	/	/	/	/	/	/	/	/	/	/	/	/	/	/	/	/	/	/	/	/	/	/	/	/	/	/	/	/	/	/	/	/	/	/	/	/
K00508	/	/	/	/	/	/	/	/	/	/	/	/	/	/	/	/	/	/	/	/	/	/	/	/	/	/	/	/	/	/	/	/	/	/	/	/	/	/	/	/	/	/	Y	/	/	/	/	/	/
K00509	/	/	/	/	/	/	/	/	/	/	/	/	/	/	/	/	/	/	/	/	/	/	/	/	/	/	/	/	/	/	/	/	/	/	/	/	/	/	/	/	/	/	/	/	/	/	/	/	/
K00510	/	/	/	/	/	/	/	/	/	/	/	/	/	/	/	/	/	/	/	/	/	/	/	/	/	/	/	/	/	/	/	/	/	/	/	/	/	/	/	/	/	/	/	/	/	/	/	/	/
K00511	/	/	/	/	/	/	/	/	/	/	/	/	/	/	/	/	/	/	/	/	/	/	/	/	/	/	/	/	/	/	/	/	/	/	/	/	/	/	/	/	/	/	/	/	/	/	/	/	/
K00512	/	/	/	/	/	/	/	/	/	/	/	/	/	/	/	/	/	/	/	/	/	/	/	/	/	/	/	/	/	/	/	/	/	/	/	/	/	/	/	/	/	/	/	/	/	/	/	/	/
K00513	/	/	/	/	/	/	/	/	/	/	/	/	/	/	/	/	/	/	/	/	/	/	/	/	/	/	/	/	/	/	/	/	/	/	/	/	/	/	/	/	/	/	/	/	/	/	/	/	/
K00514	/	/	/	/	/	/	/	/	/	Y	/	Y	/	/	/	/	/	/	/	/	/	/	/	/	/	/	/	/	/	/	/	/	/	/	/	/	/	/	/	/	/	/	/	/	/	/	/	/	/
K00515	/	/	/	/	/	/	/	/	/	/	/	/	/	/	/	/	/	/	/	/	/	/	/	/	/	/	/	/	/	/	/	/	/	/	/	/	/	/	/	/	/	/	/	/	/	/	/	/	/
K00517	/	/	/	/	/	/	/	/	/	/	/	/	/	/	/	/	/	/	/	/	/	/	/	/	/	/	/	/	/	/	/	/	/	/	/	/	/	/	/	/	/	/	/	/	/	/	/	/	/
K00518	/	/	/	/	/	/	/	/	/	/	/	/	/	/	/	/	/	/	/	/	/	/	/	/	/	/	/	/	/	/	/	/	/	/	/	/	/	/	/	/	/	/	/	/	/	Y	/	/	/
K00520	/	/	/	/	/	/	/	Y	/	/	/	/	Y	/	/	/	/	/	/	/	/	/	/	/	/	/	/	/	/	/	/	/	/	/	/	/	/	/	/	/	/	/	/	/	/	/	/	/	/
K00521	/	/	/	/	/	/	/	/	/	/	/	/	/	/	/	/	/	/	/	/	/	/	/	/	/	/	/	/	/	/	/	/	/	/	/	/	/	/	/	/	/	/	/	/	/	/	/	/	/
K00522	/	/	/	/	/	/	/	/	/	/	/	/	/	/	/	/	/	/	/	/	/	/	/	/	/	/	/	/	/	/	/	/	/	/	/	/	/	/	/	/	/	/	/	/	/	/	/	/	/
K00523	/	/	/	/	/	/	/	/	/	/	/	/	/	/	/	/	/	/	/	/	/	/	/	/	/	/	/	/	/	/	/	/	/	/	/	/	/	/	/	/	/	/	/	/	/	/	/	/	/
K00524	/	/	/	/	/	/	/	/	/	/	/	/	/	/	/	/	/	/	/	/	/	/	/	/	/	/	/	/	/	/	/	/	/	/	/	/	/	/	/	/	/	/	/	/	/	/	/	/	/
K00525	Y	/	Y	/	/	/	/	/	/	/	Y	Y	Y	Y	/	/	Y	Y	Y	Y	Y	Y	Y	Y	/	Y	Y	Y	Y	Y	Y	/	Y	Y	/	Y	Y	Y	Y	Y	/	Y	Y	Y	Y	Y	Y	Y	Y
K00526	/	/	/	/	/	/	/	/	/	/	/	/	/	/	/	/	/	/	/	/	/	/	/	/	/	/	/	/	/	/	/	/	/	/	/	Y	/	/	/	/	/	/	Y	/	/	/	/	/	/
K00527	/	/	/	/	/	/	/	/	/	/	/	/	/	/	/	/	/	/	/	/	/	/	/	/	/	/	/	/	/	/	/	/	/	/	/	/	/	/	/	/	Y	/	/	/	/	/	/	/	/
K00528	Y	Y	Y	/	Y	Y	/	/	Y	/	Y	Y	Y	Y	/	Y	Y	Y	/	/	/	Y	/	Y	/	Y	/	Y	Y	/	Y	Y	/	Y	Y	Y	Y	/	Y	Y	Y	/	Y	Y	Y	Y	Y	/	/
K00529	/	Y	Y	/	/	/	/	/	/	/	Y	Y	/	/	/	/	/	/	Y	/	Y	/	/	/	/	/	/	/	/	/	/	/	/	/	/	/	/	/	/	Y	/	/	Y	/	/	/	/	Y	/
K00531	/	/	/	/	/	/	/	/	/	/	/	/	/	/	/	/	/	/	/	/	/	/	/	/	/	/	/	/	/	/	/	/	/	/	/	/	/	/	/	/	/	/	/	/	/	/	/	/	/
K00532	/	/	/	/	/	/	/	/	/	/	/	/	/	/	/	/	/	/	/	/	/	/	/	/	/	/	/	/	/	/	/	/	/	/	/	/	/	/	/	/	/	/	/	/	/	/	/	/	/
K00533	/	/	/	/	Y	/	Y	/	/	/	/	/	/	/	/	Y	/	/	/	/	/	/	Y	/	/	/	/	/	/	/	/	/	/	/	/	/	/	/	/	Y	/	/	/	Y	/	/	Y	/	/
K00534	/	/	/	/	/	/	/	/	/	/	/	/	/	/	/	/	/	/	/	/	/	/	/	/	/	/	/	/	/	/	/	/	/	/	/	/	/	/	/	Y	/	/	/	/	/	/	/	/	/
K00537	/	/	/	/	/	Y	/	/	/	/	/	/	/	/	/	/	/	/	/	/	/	/	/	/	/	/	/	/	/	/	/	/	/	/	/	/	Y	/	/	/	/	/	/	/	/	/	/	/	Y
K00541	/	/	/	/	/	/	/	/	/	/	/	/	/	/	/	/	/	/	/	/	/	/	/	/	/	/	/	/	/	/	/	/	/	/	/	/	/	/	/	/	/	/	/	/	/	/	/	/	/
K00542	/	/	/	/	/	/	/	/	/	/	/	/	/	/	/	/	/	/	/	/	/	/	/	/	/	/	/	/	/	/	/	/	/	/	/	/	/	/	/	/	/	/	/	/	/	/	/	/	/
K00543	/	/	/	/	/	/	/	/	/	/	/	/	/	/	/	/	/	/	/	/	/	/	/	/	/	/	/	/	/	/	/	/	/	/	/	/	/	/	/	/	/	/	/	/	/	/	/	/	/
K00544	/	/	/	/	/	/	/	/	/	/	/	/	/	/	/	/	/	/	/	/	/	/	/	/	/	/	/	/	/	/	/	/	/	/	/	/	/	/	/	/	/	/	/	/	/	/	/	/	/
K00545	/	/	/	/	/	/	/	/	/	/	/	/	/	/	/	/	/	/	/	/	/	/	/	/	/	/	/	/	/	/	/	/	/	/	/	/	/	/	/	/	/	/	/	/	/	/	/	/	/
K00546	/	/	/	/	/	/	/	/	/	/	/	/	/	/	/	/	/	/	/	/	/	/	/	/	/	/	/	/	/	/	/	/	/	/	/	/	/	/	/	/	/	/	/	/	/	/	/	/	/
K00547	/	/	/	/	/	/	/	/	/	/	/	/	/	/	/	/	/	/	/	/	/	/	/	/	/	/	/	/	/	/	/	/	/	/	/	/	/	/	/	/	/	/	/	/	/	/	/	/	/
K00548	/	Y	Y	/	Y	/	Y	/	Y	Y	Y	Y	Y	Y	/	Y	Y	Y	Y	/	Y	Y	Y	Y	/	Y	Y	Y	/	Y	/	Y	Y	Y	Y	Y	Y	/	Y	Y	Y	/	/	Y	Y	/	Y	Y	Y
K00549	/	/	/	/	/	/	/	/	/	/	/	/	/	/	/	/	/	/	/	/	/	Y	/	/	/	/	/	/	/	/	Y	/	/	/	/	/	/	/	/	Y	/	/	Y	/	/	/	/	/	Y
K00550	/	/	/	/	/	/	/	/	/	/	/	/	/	/	/	/	/	/	/	/	/	/	/	/	/	/	/	/	/	/	/	/	/	/	/	/	/	/	/	/	/	/	/	/	/	/	/	/	/
K00551	/	/	/	/	/	/	/	/	/	/	/	/	/	/	/	/	/	/	/	/	/	/	/	/	/	/	/	/	/	/	/	/	/	/	/	/	/	/	/	/	/	/	/	/	/	/	/	/	/
K00552	/	/	/	/	/	/	/	/	/	/	/	/	/	/	/	/	/	/	/	/	/	/	/	/	/	/	/	/	/	/	/	/	/	/	/	/	/	/	/	/	/	/	/	/	/	/	/	/	/
K00553	/	/	/	/	/	/	/	/	/	/	/	/	/	/	/	/	/	/	/	/	/	/	/	/	/	/	/	/	/	/	/	/	/	/	/	/	/	/	/	/	/	/	/	/	/	/	/	/	/
K00554	Y	Y	Y	/	/	Y	Y	Y	/	Y	/	Y	Y	Y	Y	Y	Y	Y	Y	Y	/	Y	Y	Y	Y	Y	Y	Y	Y	Y	/	Y	Y	Y	Y	Y	Y	/	Y	Y	Y	Y	Y	Y	Y	Y	Y	Y	Y
K00555	/	/	/	/	/	/	/	/	/	/	/	/	/	/	/	/	/	/	/	/	/	/	/	/	/	/	/	/	/	/	Y	/	/	/	/	/	/	/	/	/	/	/	/	/	/	/	/	/	/
K00556	/	/	/	/	/	/	/	/	Y	/	/	/	/	/	/	/	/	/	/	/	/	Y	/	/	/	/	/	/	/	/	/	/	Y	/	Y	/	/	/	/	Y	Y	/	/	/	/	/	/	/	/
K00557	/	/	/	/	/	/	/	/	/	/	/	/	/	/	/	/	/	/	/	/	/	/	/	/	/	/	/	/	/	/	/	/	/	/	/	/	/	/	/	/	/	/	/	/	/	/	/	/	/
K00558	/	/	Y	/	/	Y	/	/	/	Y	/	/	/	/	/	/	/	/	/	/	/	/	/	/	/	/	Y	/	/	Y	/	/	/	Y	Y	/	/	/	/	/	/	/	/	/	Y	/	/	/	/
K00559	/	/	/	/	/	/	/	/	/	/	/	/	/	/	/	/	/	/	/	/	/	/	/	/	/	/	/	/	/	/	/	/	/	/	/	/	/	/	/	/	/	/	/	/	/	/	/	/	/
K00560	Y	/	Y	/	/	/	Y	Y	Y	/	/	Y	Y	Y	/	Y	Y	/	Y	/	Y	Y	/	Y	/	Y	/	Y	Y	/	Y	/	Y	Y	/	Y	Y	/	Y	/	/	Y	Y	Y	/	/	/	Y	Y
K00561	/	/	/	/	/	/	/	Y	/	/	/	/	/	/	/	/	/	/	/	/	/	Y	/	/	/	/	/	/	/	/	/	/	/	/	/	/	/	/	/	/	/	/	/	/	/	/	/	/	/
K00562	/	/	/	/	/	/	/	/	/	/	/	/	/	/	/	/	/	/	/	/	/	/	/	/	/	/	/	/	/	/	/	/	/	/	/	/	/	/	/	/	/	/	/	/	/	/	/	/	/
K00563	/	/	/	/	/	/	/	Y	/	/	/	/	/	/	/	/	/	/	/	/	Y	/	/	/	/	Y	/	/	Y	/	/	Y	/	/	/	/	/	/	/	/	/	/	/	/	/	/	/	/	/
K00564	Y	/	/	/	/	/	/	Y	/	Y	/	/	/	Y	/	Y	Y	/	Y	/	Y	/	/	/	/	Y	Y	/	Y	/	/	/	/	Y	Y	Y	/	/	Y	/	/	/	Y	/	/	/	/	/	Y
K00565	/	/	/	/	/	/	/	/	/	/	/	/	/	/	/	/	/	/	/	/	/	/	/	/	/	/	/	/	/	/	/	/	/	/	/	/	/	/	/	/	/	/	/	/	/	/	/	/	/
K00566	Y	Y	Y	Y	Y	Y	Y	/	/	/	Y	Y	/	Y	Y	Y	Y	Y	Y	Y	Y	Y	Y	Y	Y	Y	Y	Y	Y	Y	/	Y	/	Y	Y	Y	Y	Y	Y	Y	Y	Y	Y	Y	Y	Y	Y	/	Y
K00567	Y	/	Y	/	Y	/	/	Y	Y	Y	Y	Y	Y	/	Y	/	Y	Y	Y	Y	Y	/	Y	Y	Y	Y	/	/	Y	Y	Y	Y	/	Y	/	Y	/	/	Y	Y	/	Y	Y	/	Y	Y	Y	Y	/
K00568	/	/	/	/	/	/	/	/	/	/	/	Y	/	/	/	/	/	Y	/	Y	/	/	/	Y	/	Y	/	/	/	/	/	/	Y	/	/	Y	/	/	/	/	/	/	/	/	/	Y	Y	/	/
K00569	/	/	/	/	/	/	/	/	/	/	/	/	/	/	/	/	/	/	/	/	/	/	/	/	/	/	/	/	/	/	/	/	/	/	/	/	/	/	/	/	/	/	/	/	/	/	/	/	/
K00570	/	/	/	/	/	/	/	/	/	/	/	/	/	/	/	/	/	/	/	/	/	/	/	/	/	/	/	/	/	/	/	/	/	/	/	/	/	/	/	/	/	/	/	/	/	/	/	/	/
K00571	/	Y	Y	/	/	/	Y	Y	/	Y	Y	Y	/	/	Y	/	Y	/	Y	/	/	Y	/	Y	/	Y	Y	Y	Y	/	/	/	/	Y	Y	/	Y	/	Y	/	/	Y	/	/	Y	/	/	Y	/
K00572	/	/	/	/	/	/	/	/	/	/	/	/	/	/	/	/	/	/	/	/	/	/	/	/	/	/	/	/	/	/	/	/	/	/	/	/	/	/	/	/	/	/	/	/	/	/	/	/	/
K00573	/	/	/	/	/	Y	/	/	Y	/	Y	/	Y	Y	/	Y	/	Y	Y	Y	/	Y	Y	Y	Y	/	Y	Y	/	Y	Y	Y	Y	/	/	/	Y	Y	Y	Y	Y	Y	/	Y	Y	Y	/	Y	Y
K00574	/	Y	/	/	/	/	/	/	Y	/	/	/	Y	/	/	/	Y	/	/	Y	/	Y	/	/	/	/	Y	/	/	/	Y	Y	/	/	/	/	/	/	/	/	Y	/	/	/	/	Y	/	Y	/
K00575	Y	/	Y	Y	Y	Y	/	Y	/	/	/	Y	Y	Y	Y	/	/	/	/	/	/	/	Y	/	/	Y	Y	Y	Y	/	/	Y	/	Y	/	/	/	/	/	Y	/	/	/	Y	/	/	/	Y	/
K00577	/	/	/	/	/	/	/	/	/	/	/	/	/	/	/	/	/	/	/	/	/	/	/	/	/	/	/	/	/	/	Y	/	/	/	/	/	/	/	/	/	/	/	/	/	/	/	/	/	/
K00578	/	/	/	/	/	/	/	/	/	/	/	/	/	/	/	/	/	/	/	/	/	/	/	/	/	/	/	/	/	/	Y	/	/	/	/	/	/	/	/	/	/	/	/	/	/	/	/	/	/
K00579	/	/	/	/	/	/	/	/	/	/	/	/	/	/	/	/	/	/	/	/	/	/	/	/	/	/	/	/	/	/	Y	/	/	/	/	/	/	/	/	/	/	/	/	/	/	/	/	/	/
K00580	/	/	/	/	/	/	/	/	/	/	/	/	/	/	/	/	/	/	/	/	/	/	/	/	/	/	/	/	/	/	Y	/	/	/	/	/	/	/	/	/	/	/	/	/	/	/	/	/	/
K00581	/	/	/	/	/	/	/	/	/	/	/	/	/	/	/	/	/	/	/	/	/	/	/	/	/	/	/	/	/	/	Y	/	/	/	/	/	/	/	/	/	/	/	/	/	/	/	/	/	/
K00582	/	/	/	/	/	/	/	/	/	/	/	/	/	/	/	/	/	/	/	/	/	/	/	/	/	/	/	/	/	/	Y	/	/	/	/	/	/	/	/	/	/	/	/	/	/	/	/	/	/
K00583	/	/	/	/	/	/	/	/	/	/	/	/	/	/	/	/	/	/	/	/	/	/	/	/	/	/	/	/	/	/	Y	/	/	/	/	/	/	/	/	/	/	/	/	/	/	/	/	/	/
K00584	/	/	/	/	/	/	/	/	/	/	/	/	/	/	/	/	/	/	/	/	/	/	/	/	/	/	/	/	/	/	Y	/	/	/	/	/	/	/	/	/	/	/	/	/	/	/	/	/	/
K00586	/	/	/	/	/	/	/	/	/	/	/	/	/	/	/	/	/	/	/	/	/	/	/	/	/	/	/	/	/	/	/	/	/	/	/	/	/	/	/	/	/	/	/	/	/	/	/	/	/
K00587	/	/	/	/	/	/	/	/	/	/	/	/	/	/	/	/	/	/	/	/	/	/	/	/	/	/	/	/	/	/	/	/	/	/	/	/	/	/	/	/	/	/	/	/	/	/	/	/	/
K00588	/	/	/	/	/	/	Y	/	/	/	/	/	/	/	/	/	/	/	/	/	/	Y	/	/	/	/	/	/	/	/	/	/	Y	Y	/	/	Y	/	Y	/	/	/	/	Y	/	/	/	/	/
K00589	/	/	/	/	/	/	/	/	/	/	/	/	/	/	/	/	/	/	/	/	/	/	/	/	/	/	/	/	/	/	/	/	/	/	/	/	/	/	/	/	/	/	/	/	/	/	/	/	/
K00590	/	/	/	/	/	/	/	/	/	/	/	/	/	/	Y	/	/	/	/	/	/	Y	/	/	/	/	Y	Y	/	/	/	/	/	/	/	/	/	/	/	/	/	Y	/	/	/	/	/	/	/
K00591	/	/	/	/	/	/	/	/	/	/	/	/	/	/	/	/	/	/	/	/	/	/	/	/	/	/	/	/	/	/	/	/	/	/	/	/	/	/	/	/	/	/	/	/	/	/	/	/	/
K00592	/	/	/	/	/	/	/	/	/	/	/	/	/	/	/	/	/	/	/	/	/	/	/	/	/	/	/	/	/	/	/	/	/	/	/	/	/	/	/	/	/	/	/	/	/	/	/	/	/
K00594	/	/	/	/	/	/	/	/	/	/	/	/	/	/	/	/	/	/	/	/	/	/	/	/	/	/	/	/	/	/	/	/	/	/	/	/	/	/	/	/	/	/	/	/	/	/	/	/	/
K00595	/	/	/	/	Y	/	/	/	/	/	/	/	Y	/	/	/	/	/	/	/	/	/	Y	/	/	/	Y	/	/	/	/	/	/	/	/	/	/	/	/	Y	/	/	/	/	/	/	/	/	/
K00596	/	/	/	/	/	/	/	/	/	/	/	/	/	/	/	/	/	/	/	/	/	/	/	/	/	/	/	/	/	/	/	/	/	/	/	/	/	/	/	/	/	/	/	/	/	/	/	/	/
K00597	/	/	/	/	/	/	/	/	/	/	/	/	/	/	/	/	/	/	/	/	/	/	/	/	/	/	/	/	/	/	/	/	/	/	/	/	/	/	/	/	/	/	/	/	/	/	/	/	/
K00598	/	/	/	/	Y	/	/	/	/	/	/	/	/	/	/	/	/	/	/	/	/	/	/	Y	/	/	/	/	/	/	Y	/	/	Y	/	/	/	/	/	Y	/	/	/	/	/	/	/	/	/
K00599	/	/	/	/	/	/	/	/	/	/	/	/	/	/	/	/	/	/	/	/	/	/	/	/	/	/	/	/	/	/	/	/	/	/	/	/	/	/	/	/	/	/	/	/	/	/	/	/	/
K00600	Y	Y	Y	Y	Y	Y	Y	/	Y	/	Y	Y	Y	Y	Y	Y	Y	Y	Y	Y	Y	Y	Y	Y	Y	Y	Y	Y	/	Y	Y	Y	Y	Y	Y	Y	Y	Y	Y	Y	Y	Y	Y	Y	Y	/	Y	Y	Y
K00601	/	/	/	/	/	/	/	/	/	/	/	/	/	/	/	/	/	/	/	/	/	/	/	/	/	/	/	/	/	/	/	/	/	/	/	/	/	/	/	/	/	/	/	/	/	/	/	/	/
K00602	Y	Y	Y	/	/	Y	Y	Y	/	Y	Y	Y	Y	Y	Y	Y	Y	Y	/	Y	Y	Y	Y	Y	/	Y	Y	Y	Y	Y	/	Y	Y	Y	Y	Y	Y	Y	/	Y	Y	Y	Y	Y	Y	/	Y	Y	Y
K00603	Y	/	Y	Y	/	/	/	/	/	/	/	Y	Y	/	/	/	/	/	/	Y	/	/	/	Y	/	Y	/	/	Y	Y	/	/	/	/	/	Y	Y	/	Y	/	/	/	/	/	Y	Y	Y	Y	/
K00604	Y	Y	Y	Y	/	/	Y	/	/	Y	Y	Y	/	Y	Y	Y	Y	Y	Y	Y	Y	Y	Y	Y	/	Y	Y	Y	Y	Y	/	Y	Y	Y	Y	Y	Y	Y	Y	Y	Y	Y	Y	Y	Y	Y	Y	Y	Y
K00605	Y	Y	Y	Y	Y	Y	/	/	Y	Y	/	/	/	/	/	Y	/	Y	/	/	Y	Y	/	/	Y	Y	Y	Y	Y	Y	/	Y	Y	Y	Y	Y	Y	Y	Y	Y	Y	Y	Y	Y	/	Y	/	Y	Y
K00606	/	/	Y	Y	/	Y	Y	/	Y	Y	Y	Y	Y	/	/	/	/	Y	/	Y	/	Y	Y	Y	Y	/	Y	Y	/	Y	/	Y	Y	/	Y	/	Y	Y	/	Y	Y	Y	Y	/	/	/	Y	/	/
K00608	/	/	/	/	/	/	/	/	/	/	/	/	/	/	/	/	/	/	/	/	/	/	/	/	/	/	/	/	/	/	/	/	/	/	/	/	/	/	/	/	/	/	/	/	/	/	/	/	/
K00609	Y	/	Y	Y	/	Y	/	Y	/	Y	Y	Y	Y	Y	Y	Y	Y	Y	Y	Y	Y	Y	Y	/	Y	Y	Y	Y	Y	Y	Y	Y	Y	Y	/	Y	Y	Y	/	Y	Y	Y	Y	Y	Y	Y	Y	Y	Y
K00610	/	/	/	Y	/	/	/	/	/	/	/	/	/	/	/	/	/	Y	/	/	/	Y	/	/	/	/	/	/	/	/	Y	/	Y	/	/	Y	Y	/	/	/	/	/	/	Y	/	/	/	/	/
K00611	Y	Y	/	/	Y	Y	Y	Y	/	Y	Y	/	Y	/	/	Y	/	/	/	Y	Y	Y	Y	Y	Y	/	Y	Y	/	Y	Y	Y	Y	Y	Y	Y	/	Y	Y	Y	Y	Y	Y	/	Y	Y	Y	Y	Y
K00612	/	/	/	/	/	/	/	/	/	/	/	/	/	/	/	/	/	Y	/	/	/	/	/	/	/	/	Y	/	/	/	/	/	/	/	/	/	/	/	/	/	Y	Y	/	/	/	Y	/	/	/
K00613	/	/	/	/	/	/	/	/	/	/	/	/	/	/	/	/	/	/	/	Y	/	/	/	/	/	/	/	/	/	/	/	/	/	/	/	/	/	/	/	/	/	/	/	/	/	/	/	/	/
K00615	Y	Y	Y	Y	Y	Y	Y	Y	Y	Y	Y	Y	Y	Y	Y	Y	Y	Y	Y	Y	Y	Y	Y	Y	Y	Y	Y	Y	Y	Y	/	Y	Y	Y	Y	Y	Y	Y	Y	Y	Y	Y	Y	Y	Y	Y	Y	/	Y
K00616	Y	Y	Y	Y	/	/	Y	/	Y	/	/	Y	Y	Y	Y	Y	Y	/	Y	Y	/	Y	Y	Y	/	Y	Y	Y	/	Y	/	Y	Y	/	Y	/	Y	/	Y	Y	/	/	Y	/	Y	Y	/	Y	/
K00618	/	/	/	/	/	/	/	/	/	/	/	/	/	/	/	/	/	/	/	/	/	/	/	/	/	/	/	/	/	/	/	/	/	/	/	/	/	/	/	/	/	/	/	/	/	/	/	/	/
K00619	/	Y	Y	/	/	/	/	/	/	/	/	Y	Y	/	Y	/	/	/	/	/	/	/	Y	Y	/	/	/	Y	/	/	/	Y	/	/	/	/	/	/	/	Y	Y	/	Y	/	/	/	/	Y	/
K00620	/	Y	Y	/	Y	/	/	Y	/	/	/	Y	Y	Y	Y	/	Y	/	Y	/	Y	/	Y	Y	/	/	Y	Y	/	/	Y	Y	/	Y	Y	/	/	/	/	Y	Y	/	/	/	/	/	/	Y	Y
K00621	/	/	/	/	/	/	/	/	/	/	/	/	/	/	/	/	/	/	/	/	/	/	/	/	/	/	/	/	/	/	/	/	/	/	/	/	/	/	/	/	/	/	/	/	/	/	/	/	/
K00622	/	/	/	/	/	/	/	/	/	/	/	/	/	/	/	/	/	/	/	/	/	/	/	/	/	/	/	/	/	/	/	/	/	/	/	/	/	/	/	/	/	/	/	/	/	/	/	/	/
K00623	/	/	/	/	/	/	/	/	/	/	/	/	/	/	/	/	/	/	/	/	/	/	/	/	/	/	/	/	/	/	/	/	/	/	/	/	/	/	/	/	/	/	/	/	/	/	/	/	/
K00624	/	/	/	/	/	/	/	/	/	/	/	/	/	/	/	/	/	/	/	Y	/	/	/	/	/	/	/	/	/	/	/	/	/	/	/	/	/	/	/	/	/	/	/	/	/	/	/	/	/
K00625	/	/	Y	/	Y	/	/	/	Y	/	/	Y	/	Y	Y	Y	/	/	/	/	/	/	/	/	Y	/	/	/	/	/	/	/	/	Y	Y	/	Y	Y	/	/	/	Y	/	/	Y	/	/	Y	Y
K00626	Y	Y	/	/	Y	/	Y	/	/	/	/	/	Y	/	Y	/	/	/	Y	Y	Y	/	Y	Y	Y	Y	/	Y	Y	Y	Y	Y	/	/	/	Y	/	Y	Y	/	/	Y	/	Y	/	/	Y	/	/
K00627	/	/	Y	/	/	/	/	/	/	/	Y	Y	Y	/	/	Y	/	/	/	Y	Y	Y	/	Y	/	Y	Y	/	/	Y	/	/	Y	/	/	Y	Y	/	Y	Y	Y	Y	Y	Y	/	/	/	Y	Y
K00628	/	/	/	/	/	/	/	/	/	/	/	/	/	/	/	/	/	/	/	/	/	/	/	/	/	/	/	/	/	/	/	/	/	/	/	/	/	/	/	/	/	/	/	/	/	/	/	/	/
K00629	/	/	/	/	/	/	/	/	/	/	/	/	/	/	/	/	/	/	/	/	/	/	/	/	/	/	/	/	/	/	/	/	/	/	/	/	/	/	/	/	/	/	/	/	/	/	/	/	/
K00630	/	/	/	/	/	/	/	/	/	/	/	/	/	/	/	/	/	/	/	/	/	/	/	/	/	/	/	/	/	/	/	/	/	/	/	/	/	/	/	/	/	/	/	/	/	/	/	/	/
K00631	/	/	/	/	/	/	/	/	/	/	/	/	Y	/	/	/	/	/	/	/	/	/	/	/	/	/	/	/	/	/	/	/	/	/	/	/	/	/	/	/	/	/	/	/	/	/	/	/	/
K00632	/	/	/	/	/	/	/	/	/	/	/	/	/	/	/	/	/	/	/	/	/	/	/	/	/	/	/	/	/	/	/	/	/	/	/	Y	/	/	/	/	Y	/	/	/	/	/	/	/	/
K00633	/	/	/	/	/	/	/	/	/	/	/	/	/	/	/	/	/	/	/	/	/	/	/	/	/	/	/	/	/	/	/	/	/	/	/	/	/	/	/	/	/	/	/	/	/	/	/	Y	/
K00634	Y	/	/	Y	/	Y	Y	/	Y	/	Y	/	/	Y	/	/	/	Y	Y	Y	/	/	/	/	Y	Y	/	/	Y	Y	/	Y	Y	/	/	/	/	Y	Y	/	/	Y	/	Y	/	Y	Y	/	/
K00635	/	/	/	/	/	/	/	/	/	/	/	/	/	/	/	/	/	/	/	/	/	/	/	/	/	/	/	/	/	/	/	/	/	/	/	/	/	/	/	/	/	/	/	/	/	/	/	/	/
K00637	/	/	/	/	/	/	/	/	/	/	/	/	/	/	/	/	/	/	/	/	/	/	/	/	/	/	/	/	/	/	/	/	/	/	/	/	/	/	/	/	/	/	/	/	/	/	/	/	/
K00638	/	/	/	/	/	/	/	/	/	/	/	/	/	/	/	/	/	/	/	/	/	/	/	/	/	/	/	/	/	/	/	/	/	/	/	/	/	/	/	/	/	/	/	/	/	/	/	/	/
K00639	Y	/	/	Y	/	Y	Y	Y	/	/	Y	/	/	/	/	Y	/	Y	/	Y	/	Y	Y	Y	Y	Y	Y	/	Y	Y	/	/	Y	/	Y	Y	Y	Y	Y	Y	/	Y	Y	Y	/	Y	Y	/	/
K00640	Y	Y	Y	/	/	/	/	/	/	Y	/	Y	/	Y	Y	Y	Y	/	Y	/	Y	Y	Y	Y	/	/	Y	Y	/	Y	/	Y	Y	Y	Y	Y	Y	/	Y	Y	Y	Y	Y	/	Y	/	Y	Y	Y
K00641	/	Y	Y	/	/	/	/	Y	/	Y	/	Y	/	/	/	/	/	/	Y	/	Y	/	Y	Y	/	/	Y	/	/	/	/	/	/	/	/	/	/	/	/	Y	Y	/	Y	Y	/	/	/	Y	/
K00643	/	/	/	/	/	/	/	/	/	/	/	/	/	/	/	/	/	/	/	/	/	/	/	/	/	/	/	/	/	/	/	/	/	/	/	/	/	/	/	/	/	/	/	/	/	/	/	/	/
K00645	Y	Y	Y	Y	/	Y	Y	/	/	Y	Y	Y	Y	Y	Y	Y	Y	Y	Y	Y	Y	Y	Y	Y	Y	Y	Y	Y	Y	/	/	Y	Y	Y	Y	Y	Y	Y	Y	Y	Y	Y	Y	Y	Y	/	Y	Y	/
K00646	/	/	/	/	/	/	/	/	/	/	/	/	/	/	/	/	/	/	/	/	/	/	/	/	/	/	/	/	/	/	/	/	/	/	/	/	/	/	/	/	/	/	/	/	/	/	/	/	/
K00647	/	/	/	/	/	/	/	/	/	/	/	/	/	/	/	/	/	/	/	/	/	/	/	/	/	/	/	/	/	/	/	/	/	/	/	/	/	/	/	/	/	/	/	Y	/	/	/	/	/
K00648	Y	Y	Y	Y	Y	Y	Y	Y	Y	Y	/	Y	/	Y	Y	Y	Y	Y	/	Y	Y	Y	Y	Y	Y	Y	Y	Y	Y	Y	Y	Y	Y	Y	Y	Y	Y	Y	Y	Y	Y	Y	/	Y	Y	/	Y	Y	Y
K00649	/	/	/	/	/	/	/	/	/	/	/	/	/	/	/	/	/	/	/	/	/	/	/	/	/	/	/	/	/	/	/	/	/	/	/	/	/	/	/	/	/	/	/	/	/	/	/	/	/
K00650	/	/	/	/	/	/	/	/	/	/	/	/	/	/	/	/	/	/	/	/	/	/	/	/	/	/	/	/	/	/	/	/	/	/	/	/	/	/	/	/	/	/	/	/	/	/	/	/	/
K00651	/	/	/	/	/	/	/	/	/	/	/	/	/	/	Y	/	/	/	/	/	/	Y	/	/	/	/	/	/	/	/	/	Y	Y	Y	/	/	Y	/	/	/	/	/	/	/	/	/	Y	/	Y
K00652	Y	/	/	/	/	Y	/	/	Y	/	/	/	/	/	/	Y	/	Y	/	/	/	/	Y	Y	Y	/	Y	/	/	/	/	/	/	Y	/	/	Y	Y	Y	Y	/	Y	/	/	/	Y	/	/	Y
K00653	/	/	/	/	/	/	/	/	/	/	/	/	/	/	/	/	/	/	/	/	/	/	/	/	/	/	/	/	/	/	/	/	/	/	/	/	/	/	/	/	/	/	/	/	/	/	/	/	/
K00654	/	/	/	/	/	/	/	/	/	/	/	/	/	/	/	/	/	/	/	/	/	/	/	/	/	/	/	/	/	/	/	/	/	/	/	/	/	/	/	/	/	/	/	/	/	/	/	/	/
K00655	Y	Y	Y	Y	Y	Y	Y	Y	/	Y	Y	Y	Y	/	Y	Y	Y	Y	Y	Y	Y	Y	Y	Y	Y	Y	Y	Y	Y	Y	/	Y	Y	Y	Y	Y	Y	Y	/	Y	/	Y	Y	/	/	Y	Y	Y	Y
K00656	/	Y	/	/	/	/	Y	/	/	Y	/	/	/	Y	/	Y	/	/	Y	Y	/	/	Y	Y	/	Y	Y	/	/	/	/	/	Y	/	Y	/	/	/	/	Y	Y	/	/	Y	Y	Y	Y	/	Y
K00657	/	/	/	/	/	/	/	/	/	/	Y	Y	/	/	/	/	/	/	/	Y	/	Y	/	Y	Y	Y	/	/	/	Y	/	/	Y	/	/	/	Y	/	/	/	/	/	/	Y	Y	/	/	/	Y
K00658	/	/	/	/	/	/	/	/	/	/	/	/	/	/	/	/	/	/	/	/	/	Y	/	/	/	/	Y	/	/	/	/	/	Y	/	/	/	Y	/	/	/	Y	/	Y	/	/	/	/	Y	/
K00659	/	/	/	/	/	/	/	/	/	/	/	/	/	/	/	/	/	/	/	/	/	/	/	/	/	/	/	/	/	/	/	/	/	/	/	/	/	/	/	/	/	/	/	/	/	/	/	/	/
K00660	/	/	/	/	/	/	/	/	/	/	/	/	/	/	/	/	/	/	/	/	/	/	/	/	/	/	/	/	/	/	/	/	/	/	/	/	/	/	/	/	/	/	/	/	/	/	/	/	/
K00661	Y	/	Y	/	/	/	/	/	/	/	/	Y	/	/	/	/	/	/	/	/	Y	/	/	/	/	/	/	/	/	Y	/	/	/	/	/	/	/	/	/	/	Y	/	/	Y	/	/	/	/	/
K00662	/	/	/	/	/	/	/	/	/	/	/	/	/	Y	/	Y	Y	/	Y	/	/	/	/	Y	/	/	/	/	Y	/	/	/	/	/	Y	/	/	/	/	/	Y	/	/	/	/	/	/	/	Y
K00663	/	/	/	/	/	/	/	/	/	Y	/	/	/	/	/	Y	/	/	/	/	/	/	/	/	/	/	/	/	/	/	/	/	/	/	/	/	/	/	/	/	/	/	/	/	/	/	/	/	/
K00664	/	/	/	/	/	/	/	/	/	/	/	/	/	/	/	/	/	/	/	/	/	/	/	/	/	/	/	/	/	/	/	/	/	/	/	/	/	/	/	/	/	/	/	/	/	/	/	/	/
K00665	/	/	/	/	/	/	/	/	/	/	/	/	/	/	/	/	/	/	/	/	/	/	/	/	/	/	/	/	/	/	/	/	/	/	/	/	/	/	/	/	/	/	/	/	/	/	/	/	/
K00666	/	/	/	/	/	/	/	/	/	/	/	/	/	Y	Y	/	/	/	Y	/	/	Y	/	/	/	/	/	Y	/	/	Y	Y	/	Y	/	/	/	/	/	Y	/	/	/	/	Y	/	/	/	Y
K00667	/	/	/	/	/	/	/	/	/	/	/	/	/	/	/	/	/	/	/	/	/	/	/	/	/	/	/	/	/	/	/	/	/	/	/	/	/	/	/	/	/	/	/	/	/	/	/	/	/
K00668	/	/	/	/	/	/	/	/	/	/	/	/	/	/	/	/	/	/	/	/	/	/	/	/	/	/	/	/	/	/	/	/	/	/	/	/	/	/	/	/	/	/	/	/	/	/	/	/	/
K00669	/	/	/	/	/	/	/	/	/	/	/	/	/	/	/	/	/	/	/	/	/	/	/	/	/	/	/	/	/	/	/	/	/	/	/	/	/	/	/	/	/	/	/	/	/	/	/	/	/
K00670	/	/	/	/	/	/	/	/	/	/	/	/	/	/	/	/	/	/	/	/	/	/	/	/	/	/	/	/	/	/	/	/	/	/	/	/	/	/	/	/	/	/	/	/	/	/	/	/	/
K00671	/	/	/	/	/	/	/	/	/	/	/	/	/	/	/	/	/	/	/	/	/	/	/	/	/	/	/	/	/	/	/	/	/	/	/	/	/	/	/	/	/	/	/	/	/	/	/	/	/
K00672	/	/	/	/	/	/	/	/	/	/	/	/	/	/	/	/	/	/	/	Y	/	/	/	/	/	/	/	/	/	/	Y	/	/	/	/	/	/	/	/	/	/	/	/	/	/	/	/	/	/
K00673	/	/	/	/	/	/	/	/	/	/	/	/	/	/	/	/	/	/	/	/	/	/	/	/	/	/	/	/	/	/	/	/	/	/	/	/	/	/	/	/	/	/	/	/	/	/	/	/	/
K00674	/	/	/	Y	/	/	Y	/	/	/	/	/	/	/	/	/	/	/	/	/	Y	/	/	/	Y	/	/	/	/	Y	/	/	/	/	/	/	/	Y	/	/	/	Y	/	/	/	/	/	/	/
K00675	/	/	/	/	/	/	/	/	/	/	/	/	/	/	/	Y	/	/	/	/	/	/	/	/	/	/	/	/	/	/	/	/	/	/	/	/	/	/	/	/	/	/	/	/	/	/	/	/	/
K00677	/	/	Y	/	/	Y	/	Y	/	/	/	Y	Y	Y	/	/	Y	Y	Y	Y	/	Y	Y	/	/	/	/	/	/	/	/	/	Y	/	Y	/	Y	/	/	/	Y	/	/	Y	/	Y	Y	/	/
K00678	/	/	/	/	/	/	/	/	/	/	/	/	/	/	/	/	/	/	/	/	/	/	/	/	/	/	/	/	/	/	/	/	/	/	/	/	/	/	/	/	/	/	/	/	/	/	/	/	/
K00679	/	/	/	/	/	/	/	/	/	/	/	/	/	/	/	/	/	/	/	/	/	/	/	/	/	/	/	/	/	/	/	/	/	/	/	/	/	/	/	/	/	/	/	/	/	/	/	/	/
K00681	Y	Y	Y	/	/	/	/	/	/	Y	/	Y	Y	Y	/	/	/	/	/	Y	Y	/	/	Y	/	Y	/	/	/	Y	/	/	Y	/	Y	/	/	/	Y	Y	/	/	Y	/	/	/	/	/	/
K00682	/	/	/	/	/	/	/	/	Y	/	/	/	/	/	/	/	/	/	/	/	/	/	/	/	/	/	/	/	/	/	/	/	/	/	/	/	/	/	/	/	/	/	/	/	/	/	/	/	/
K00683	/	/	/	/	/	/	/	/	/	/	/	/	Y	/	/	/	/	Y	/	/	/	Y	/	/	/	Y	/	/	Y	/	Y	/	/	/	/	/	/	/	/	Y	Y	/	/	Y	Y	/	/	/	/
K00684	/	/	/	/	/	/	/	Y	/	/	/	/	Y	/	/	/	/	/	/	/	/	/	Y	/	/	/	Y	/	/	/	/	/	/	/	/	/	/	/	/	Y	Y	/	/	/	/	/	/	/	/
K00685	/	/	/	/	/	/	/	/	/	/	/	/	/	/	/	/	/	/	/	/	/	/	/	/	/	/	/	/	/	/	/	/	/	/	/	/	/	/	/	/	/	/	/	/	/	/	/	/	/
K00686	/	/	/	/	/	/	/	/	/	/	/	/	/	/	/	/	/	/	/	/	/	/	/	/	/	/	/	/	/	/	/	/	/	Y	/	/	/	/	/	/	/	/	/	/	/	/	/	/	/
K00687	/	/	/	/	/	/	/	/	/	/	/	/	/	/	/	/	/	/	/	/	/	/	/	/	/	/	/	/	/	/	/	/	/	/	/	/	/	/	/	/	/	/	/	/	/	/	/	/	/
K00688	/	Y	/	/	/	/	/	Y	/	Y	Y	/	Y	Y	/	Y	/	Y	/	Y	/	Y	Y	Y	Y	Y	Y	/	Y	/	Y	/	/	Y	Y	Y	Y	Y	Y	Y	Y	Y	Y	/	Y	/	/	/	Y
K00689	/	/	/	/	/	/	/	/	/	/	/	/	/	/	/	/	/	/	/	/	/	/	/	/	/	/	/	/	/	/	/	/	/	/	/	/	/	/	/	/	/	/	/	/	/	/	/	/	/
K00690	/	/	/	/	/	/	/	/	/	/	/	/	/	/	/	/	/	/	/	/	/	/	/	/	/	Y	Y	/	/	/	/	/	/	/	/	/	/	/	/	/	/	/	/	/	/	/	/	/	/
K00691	/	/	/	/	/	/	/	/	/	/	/	/	/	/	/	/	Y	/	/	/	/	/	/	/	/	Y	/	/	/	/	/	/	Y	Y	/	Y	/	/	/	/	/	/	/	/	/	/	/	/	/
K00692	/	/	/	/	/	/	/	/	/	/	/	/	/	/	/	/	/	/	/	/	/	/	/	/	/	/	/	/	/	/	/	/	/	/	/	/	/	/	/	/	/	/	/	/	/	/	/	/	/
K00693	/	/	/	/	/	/	/	/	/	/	/	/	/	/	/	/	/	/	/	/	/	Y	/	/	/	/	/	/	/	/	/	/	/	/	/	/	/	/	/	/	/	/	/	/	/	/	/	/	/
K00694	/	/	/	/	/	/	/	Y	/	/	/	/	/	/	/	/	/	/	/	/	/	/	/	/	/	/	/	/	/	/	/	/	/	/	/	/	/	/	/	/	/	/	/	/	/	/	/	/	/
K00695	/	/	/	/	/	/	/	/	/	/	/	/	/	/	/	/	/	/	/	/	/	/	/	/	/	/	/	/	/	/	/	/	/	/	/	/	/	/	/	/	/	/	/	/	/	/	/	/	/
K00696	/	/	/	/	/	/	/	/	/	/	/	/	/	/	/	/	/	/	/	/	/	/	/	/	/	/	/	/	/	/	/	/	/	/	/	/	/	/	/	/	/	/	/	/	/	/	/	/	/
K00697	/	/	/	/	/	/	/	/	/	/	/	/	/	/	/	/	/	/	/	Y	/	/	Y	/	/	/	Y	/	/	Y	/	/	/	/	/	/	/	/	/	Y	/	/	Y	/	/	/	/	/	/
K00698	/	/	/	/	/	/	/	/	/	/	/	/	/	/	/	/	/	/	/	/	/	/	/	/	/	/	/	/	/	/	/	/	/	/	/	/	/	/	/	/	/	/	/	/	/	/	/	/	/
K00699	/	/	/	/	/	/	/	/	/	/	/	/	/	/	/	/	/	/	/	/	/	/	/	/	/	/	/	/	/	/	/	/	/	/	/	/	/	/	/	/	/	/	/	/	/	/	/	/	/
K00700	/	/	/	/	/	/	/	/	/	/	Y	/	/	/	Y	Y	/	Y	/	Y	Y	/	Y	Y	/	Y	Y	/	Y	/	/	/	Y	Y	/	Y	Y	/	Y	Y	/	/	Y	Y	Y	/	Y	/	Y
K00701	/	/	/	/	/	/	/	/	/	/	/	/	/	/	/	/	/	/	/	/	/	/	/	/	/	/	/	/	/	/	/	/	/	/	/	/	/	/	/	/	/	/	/	/	/	/	/	/	/
K00702	/	/	Y	/	/	/	/	/	/	/	/	Y	/	/	/	/	Y	/	/	/	/	/	/	/	/	Y	/	/	/	/	/	/	/	Y	/	/	/	/	/	/	/	/	/	/	/	/	/	Y	/
K00703	/	/	Y	/	/	Y	/	/	Y	/	/	/	Y	Y	/	Y	Y	Y	Y	Y	/	Y	Y	Y	/	/	Y	/	Y	Y	/	Y	Y	Y	/	Y	Y	/	Y	Y	Y	/	/	Y	Y	/	Y	Y	/
K00704	/	/	/	/	/	/	/	/	/	/	/	/	/	/	/	/	/	/	/	/	/	/	/	/	/	/	/	/	/	/	/	/	/	/	/	/	/	/	/	/	/	/	/	/	/	/	/	/	/
K00705	/	Y	/	/	/	/	/	Y	/	Y	Y	/	/	Y	Y	Y	Y	/	/	Y	Y	Y	Y	Y	/	/	Y	/	/	Y	Y	Y	Y	/	/	Y	Y	Y	Y	Y	Y	Y	Y	Y	Y	/	Y	/	Y
K00706	/	/	/	/	/	/	/	/	/	/	/	/	/	/	/	/	/	/	/	/	/	/	/	/	/	/	/	/	/	/	/	/	/	/	/	/	/	/	/	/	/	/	/	/	/	/	/	/	/
K00709	/	/	/	/	/	/	/	/	/	/	/	/	/	/	/	/	/	/	/	/	/	/	/	/	/	/	/	/	/	/	/	/	/	/	/	/	/	/	/	/	/	/	/	/	/	/	/	/	/
K00710	/	/	/	/	/	/	/	/	/	/	/	/	/	/	/	/	/	/	/	/	/	/	/	/	/	/	/	/	/	/	/	/	/	/	/	/	/	/	/	/	/	/	/	/	/	/	/	/	/
K00712	/	/	/	/	/	/	/	/	/	/	/	/	/	/	/	/	/	/	/	/	/	/	/	/	/	/	/	/	/	/	/	/	/	/	/	/	/	/	/	/	/	/	/	/	/	/	/	/	/
K00713	/	/	/	/	/	/	/	/	/	/	/	/	/	/	/	/	/	/	/	/	/	/	/	/	/	/	/	/	/	/	/	/	/	/	/	/	/	/	/	/	/	/	/	/	/	/	/	/	/
K00714	/	/	/	/	/	/	/	/	/	/	/	/	/	/	/	/	/	/	/	/	/	/	/	/	/	/	/	/	/	/	/	/	/	/	/	/	/	/	/	/	/	/	/	/	/	/	/	/	/
K00715	/	/	/	/	/	/	/	/	/	/	/	/	/	/	/	/	/	/	/	/	/	/	/	/	/	/	/	/	/	/	/	/	/	/	/	/	/	/	/	/	/	/	/	/	/	/	/	/	/
K00716	/	/	/	/	/	/	/	/	/	/	/	/	/	/	/	/	/	/	/	/	/	/	/	/	/	/	/	/	/	/	/	/	/	/	/	/	/	/	/	/	/	/	/	/	/	/	/	/	/
K00717	/	/	/	/	/	/	/	/	/	/	/	/	/	/	/	/	/	/	/	/	/	/	/	/	/	/	/	/	/	/	/	/	/	/	/	/	/	/	/	/	/	/	/	/	/	/	/	/	/
K00718	/	/	/	/	/	/	/	/	/	/	/	/	/	/	/	/	/	/	/	/	/	/	/	/	/	/	/	/	/	/	/	/	/	/	/	/	/	/	/	/	/	/	/	/	/	/	/	/	/
K00719	/	/	/	/	/	/	/	/	/	/	/	/	/	/	/	/	/	/	/	/	/	/	/	/	/	/	/	/	/	/	/	/	/	/	/	/	/	/	/	/	/	/	/	/	/	/	/	/	/
K00720	/	/	/	/	/	/	/	/	/	/	/	/	Y	/	/	/	/	/	/	/	/	/	Y	/	/	/	/	/	/	/	/	/	/	/	/	/	/	/	/	/	/	/	/	/	/	Y	/	/	/
K00721	/	/	Y	/	/	Y	/	/	/	/	/	Y	Y	Y	/	/	Y	Y	Y	/	Y	Y	Y	Y	Y	/	Y	/	/	/	Y	Y	Y	/	Y	/	Y	Y	/	/	Y	Y	Y	Y	/	Y	/	Y	/
K00722	/	/	/	/	/	/	/	/	/	/	/	/	/	/	/	/	/	/	/	/	/	/	/	/	/	/	/	/	/	/	/	/	/	/	/	/	/	/	/	/	/	/	/	/	/	/	/	/	/
K00725	/	/	/	/	/	/	/	/	/	/	/	/	/	/	/	/	/	/	/	/	/	/	/	/	/	/	/	/	/	/	/	/	/	/	/	/	/	/	/	/	/	/	/	/	/	/	/	/	/
K00726	/	/	/	/	/	/	/	/	/	/	/	/	/	/	/	/	/	/	/	/	/	/	/	/	/	/	/	/	/	/	/	/	/	/	/	/	/	/	/	/	/	/	/	/	/	/	/	/	/
K00727	/	/	/	/	/	/	/	/	/	/	/	/	/	/	/	/	/	/	/	/	/	/	/	/	/	/	/	/	/	/	/	/	/	/	/	/	/	/	/	/	/	/	/	/	/	/	/	/	/
K00728	/	/	/	/	/	/	/	/	/	/	/	/	/	/	/	/	/	/	/	/	/	/	/	/	/	/	/	/	/	/	/	/	/	/	/	/	/	/	/	/	/	/	/	/	/	/	/	/	/
K00729	/	/	/	/	/	/	/	/	/	Y	/	/	/	Y	/	/	Y	/	/	/	/	/	/	/	/	/	/	/	/	/	/	/	/	/	Y	/	/	/	/	/	/	/	/	/	/	/	/	/	/
K00730	/	/	/	/	/	/	/	/	/	/	/	/	/	/	/	/	/	/	/	/	/	/	/	/	/	/	/	/	/	/	/	/	/	/	/	/	/	/	/	/	/	/	/	/	/	/	/	/	/
K00731	/	/	/	/	/	/	/	/	/	/	/	/	/	/	/	/	/	/	/	/	/	/	/	/	/	/	/	/	/	/	/	/	/	/	/	/	/	/	/	/	/	/	/	/	/	/	/	/	/
K00733	/	/	/	/	/	/	/	/	/	/	/	/	/	/	/	/	/	/	/	/	/	/	/	/	/	/	/	/	/	/	/	/	/	/	/	/	/	/	/	/	/	/	/	/	/	/	/	/	/
K00734	/	/	/	/	/	/	/	/	/	/	/	/	/	/	/	/	/	/	/	/	/	/	/	/	/	/	/	/	/	/	/	/	/	/	/	/	/	/	/	/	/	/	/	/	/	/	/	/	/
K00735	/	/	/	/	/	/	/	/	/	/	/	/	/	/	/	/	/	/	/	/	/	/	/	/	/	/	/	/	/	/	/	/	/	/	/	/	/	/	/	/	/	/	/	/	/	/	/	/	/
K00736	/	/	/	/	/	/	/	/	/	/	/	/	/	/	/	/	/	/	/	/	/	/	/	/	/	/	/	/	/	/	/	/	/	/	/	/	/	/	/	/	/	/	/	/	/	/	/	/	/
K00737	/	/	/	/	/	/	/	/	/	/	/	/	/	/	/	/	/	/	/	/	/	/	/	/	/	/	/	/	/	/	/	/	/	/	/	/	/	/	/	/	/	/	/	/	/	/	/	/	/
K00738	/	/	/	/	/	/	/	/	/	/	/	/	/	/	/	/	/	/	/	/	/	/	/	/	/	/	/	/	/	/	/	/	/	/	/	/	/	/	/	/	/	/	/	/	/	/	/	/	/
K00739	/	/	/	/	/	/	/	/	/	/	/	/	/	/	/	/	/	/	/	/	/	/	/	/	/	/	/	/	/	/	/	/	/	/	/	/	/	/	/	/	/	/	/	/	/	/	/	/	/
K00741	/	/	/	/	/	/	/	/	/	/	/	/	/	/	/	/	/	/	/	/	/	/	/	/	/	/	/	/	/	/	/	/	/	/	/	/	/	/	/	/	/	/	/	/	/	/	/	/	/
K00742	/	/	/	/	/	/	/	/	/	/	/	/	/	/	/	/	/	/	/	/	/	/	/	/	/	/	/	/	/	/	/	/	/	/	/	/	/	/	/	/	/	/	/	/	/	/	/	/	/
K00743	/	/	/	/	/	/	/	/	/	/	/	/	/	/	/	/	/	/	/	/	/	/	/	/	/	/	/	/	/	/	/	/	/	/	/	/	/	/	/	/	/	/	/	/	/	/	/	/	/
K00744	/	/	/	/	/	/	/	/	/	/	/	/	/	/	/	/	/	/	/	/	/	/	/	/	/	/	/	/	/	/	/	/	/	/	/	/	/	/	/	/	/	/	/	/	/	/	/	/	/
K00745	/	/	/	/	/	/	/	/	/	/	/	/	/	/	/	/	/	/	/	/	/	/	/	/	/	/	/	/	/	/	/	/	/	/	/	/	/	/	/	/	/	/	/	/	/	/	/	/	/
K00746	/	/	/	/	/	/	/	/	/	/	/	/	/	/	/	/	/	/	/	/	/	/	/	/	/	/	/	/	/	/	/	/	/	/	/	/	/	/	/	/	/	/	/	/	/	/	/	/	/
K00747	/	/	/	/	/	/	/	/	/	/	/	/	/	/	/	/	/	/	/	/	/	/	/	/	/	/	/	/	/	/	/	/	/	/	/	/	/	/	/	/	/	/	/	/	/	/	/	/	/
K00748	/	/	Y	/	/	Y	/	/	/	Y	/	Y	Y	Y	/	/	Y	Y	Y	Y	/	Y	Y	/	Y	Y	Y	/	Y	Y	/	/	Y	/	Y	/	Y	Y	/	/	Y	Y	/	Y	Y	Y	Y	Y	/
K00749	/	/	/	/	/	/	/	/	/	/	/	/	/	/	/	/	/	/	/	/	/	/	/	/	/	/	/	/	/	/	/	/	/	/	/	/	/	/	/	/	/	/	/	/	/	/	/	/	/
K00750	/	/	/	/	/	/	/	/	/	/	/	/	/	/	/	/	/	/	/	/	/	/	/	/	/	/	/	/	/	/	/	/	/	/	/	/	/	/	/	/	/	/	/	/	/	/	/	/	/
K00752	/	/	/	/	/	/	/	/	/	/	/	/	/	/	/	/	/	/	/	/	/	/	/	/	/	/	/	/	/	/	/	/	/	/	/	/	/	/	/	Y	/	/	/	/	/	/	/	/	/
K00753	/	/	/	/	/	/	/	/	/	/	/	/	/	/	/	/	/	/	/	/	/	/	/	/	/	/	/	/	/	/	/	/	/	/	/	/	/	/	/	/	/	/	/	/	/	/	/	/	/
K00756	/	Y	Y	/	Y	Y	Y	/	/	Y	/	Y	/	/	/	/	/	Y	/	Y	/	/	/	Y	Y	Y	/	Y	Y	Y	/	Y	/	Y	Y	Y	/	Y	Y	/	/	Y	/	/	/	/	Y	/	/
K00757	/	/	/	Y	/	/	/	/	/	/	/	/	/	/	/	/	/	/	/	/	/	Y	/	/	/	/	/	/	/	/	/	/	Y	/	/	/	Y	/	/	/	/	/	/	Y	/	/	/	/	/
K00758	Y	/	/	/	/	/	/	Y	/	/	/	/	/	/	/	/	/	/	/	/	Y	/	/	/	/	/	/	/	/	/	/	/	/	/	/	/	/	/	/	/	/	/	Y	/	/	/	/	/	/
K00759	Y	/	Y	/	/	Y	/	Y	Y	Y	Y	Y	/	/	/	Y	/	Y	/	Y	Y	Y	Y	Y	/	Y	Y	/	Y	/	Y	/	/	/	Y	Y	Y	/	Y	Y	Y	/	Y	/	Y	Y	/	/	Y
K00760	Y	Y	Y	/	Y	Y	Y	Y	/	Y	Y	Y	Y	Y	Y	Y	Y	Y	Y	Y	/	Y	Y	Y	Y	Y	Y	Y	Y	/	/	Y	Y	Y	Y	Y	Y	Y	Y	Y	Y	Y	Y	Y	Y	/	Y	Y	Y
K00761	Y	Y	/	/	/	/	/	Y	/	Y	Y	/	/	/	/	Y	/	Y	/	Y	Y	Y	/	Y	/	Y	/	/	Y	Y	/	/	/	Y	/	Y	Y	/	Y	Y	/	/	/	Y	/	Y	Y	/	Y
K00762	Y	/	/	Y	Y	Y	Y	Y	Y	Y	/	/	Y	Y	Y	Y	/	Y	Y	Y	Y	Y	Y	/	Y	Y	Y	Y	Y	Y	Y	Y	Y	Y	Y	Y	Y	Y	/	Y	Y	Y	Y	Y	Y	Y	Y	/	Y
K00763	Y	/	Y	/	/	/	Y	/	/	/	Y	Y	Y	/	/	Y	/	/	/	Y	Y	Y	/	/	/	Y	Y	Y	Y	Y	/	/	/	/	Y	Y	Y	/	Y	Y	Y	/	/	Y	Y	/	Y	Y	Y
K00764	Y	Y	Y	Y	Y	Y	Y	Y	Y	/	Y	Y	Y	Y	/	Y	Y	Y	Y	Y	Y	Y	Y	Y	/	Y	Y	Y	Y	Y	Y	Y	Y	Y	/	Y	Y	/	/	Y	Y	Y	/	Y	Y	Y	Y	Y	Y
K00765	/	Y	Y	Y	Y	/	Y	Y	/	Y	/	Y	Y	Y	Y	Y	Y	/	Y	Y	Y	Y	Y	Y	/	/	Y	Y	/	Y	Y	Y	Y	Y	/	/	Y	/	/	Y	/	/	Y	Y	Y	Y	Y	Y	Y
K00766	/	/	Y	/	/	/	/	Y	/	Y	/	Y	Y	Y	/	Y	Y	/	Y	/	Y	Y	Y	/	/	/	Y	/	/	/	Y	Y	/	Y	Y	/	Y	/	/	Y	Y	/	Y	/	Y	/	/	Y	Y
K00767	Y	Y	/	Y	Y	Y	/	/	/	Y	/	Y	Y	Y	/	/	Y	Y	Y	/	/	Y	Y	Y	Y	/	Y	/	/	/	Y	Y	Y	Y	Y	/	Y	Y	/	Y	Y	Y	Y	Y	Y	Y	Y	Y	Y
K00768	/	/	/	/	/	/	Y	/	/	Y	Y	/	Y	Y	Y	/	/	/	/	/	Y	/	Y	/	/	/	Y	Y	/	Y	/	/	/	/	/	/	/	/	/	Y	/	/	/	/	/	/	/	/	/
K00769	/	/	/	/	/	/	/	/	/	/	/	/	/	/	/	/	/	/	/	Y	/	/	/	/	/	/	/	/	/	Y	/	/	/	/	/	/	/	/	/	/	/	/	/	/	/	/	Y	/	/
K00770	/	/	/	/	/	/	/	/	/	/	/	/	/	/	/	/	/	/	/	/	/	/	/	/	/	/	/	/	/	/	/	/	/	/	/	/	/	/	/	/	/	/	/	/	/	/	/	/	/
K00771	/	/	/	/	/	/	/	/	/	/	/	/	/	/	/	/	/	/	/	/	/	/	/	/	/	/	/	/	/	/	/	/	/	/	/	/	/	/	/	/	/	/	/	/	/	/	/	/	/
K00772	/	Y	Y	Y	Y	/	Y	Y	Y	Y	/	Y	/	Y	Y	/	Y	Y	Y	/	/	/	Y	/	/	/	/	Y	/	/	Y	Y	/	/	Y	/	/	/	/	Y	/	/	/	/	/	/	/	/	/
K00773	Y	Y	Y	Y	/	Y	Y	/	Y	Y	Y	Y	Y	Y	Y	/	Y	Y	Y	Y	/	Y	Y	/	Y	Y	Y	Y	Y	Y	/	Y	Y	Y	/	Y	Y	Y	Y	Y	Y	/	/	Y	Y	/	Y	Y	Y
K00774	/	/	/	/	/	/	/	/	/	/	/	/	/	/	/	/	/	/	/	/	/	/	/	/	/	/	/	/	/	/	/	/	/	/	/	/	/	/	/	/	/	/	/	/	/	/	/	/	/
K00775	/	/	/	/	/	/	/	/	/	/	/	/	/	/	/	/	/	/	/	/	/	/	/	/	/	/	/	/	/	/	/	/	/	/	/	/	/	/	/	/	/	/	/	/	/	/	/	/	/
K00776	/	/	/	/	/	/	/	/	/	/	/	/	/	/	/	/	/	/	/	/	/	/	/	/	/	/	/	/	/	/	/	/	/	/	/	/	/	/	/	/	/	/	/	/	/	/	/	/	/
K00778	/	/	/	/	/	/	/	/	/	/	/	/	/	/	/	/	/	/	/	/	/	/	/	/	/	/	/	/	/	/	/	/	/	/	/	/	/	/	/	/	/	/	/	/	/	/	/	/	/
K00779	/	/	/	/	/	/	/	/	/	/	/	/	/	/	/	/	/	/	/	/	/	/	/	/	/	/	/	/	/	/	/	/	/	/	/	/	/	/	/	/	/	/	/	/	/	/	/	/	/
K00780	/	/	/	/	/	/	/	/	/	/	/	/	/	/	/	/	/	/	/	/	/	/	/	/	/	/	/	/	/	/	/	/	/	/	/	/	/	/	/	/	/	/	/	/	/	/	/	/	/
K00781	/	/	/	/	/	/	/	/	/	/	/	/	/	/	/	/	/	/	/	/	/	/	/	/	/	/	/	/	/	/	/	/	/	/	/	/	/	/	/	/	/	/	/	/	/	/	/	/	/
K00782	/	/	/	/	/	/	/	/	/	/	/	/	Y	/	/	/	/	/	Y	/	Y	/	Y	/	/	/	Y	/	/	/	/	/	/	/	/	/	/	/	/	Y	/	/	/	/	/	/	/	/	/
K00783	Y	/	/	Y	Y	/	/	/	Y	/	/	/	Y	/	/	Y	/	/	/	Y	/	Y	Y	/	Y	Y	/	Y	Y	Y	/	Y	Y	Y	/	Y	Y	Y	Y	Y	/	Y	/	/	/	Y	/	/	Y
K00784	Y	Y	Y	/	/	/	Y	/	/	/	Y	Y	Y	Y	Y	Y	/	Y	/	/	/	Y	Y	Y	Y	/	Y	/	Y	/	Y	Y	Y	Y	/	Y	Y	Y	Y	/	Y	Y	/	Y	/	/	/	/	Y
K00785	/	/	/	/	/	/	/	/	/	/	/	/	/	/	/	/	/	/	/	/	/	/	/	/	/	/	/	/	/	/	/	/	/	/	/	/	/	/	/	/	/	/	/	/	/	/	/	/	/
K00786	/	Y	Y	Y	/	Y	/	/	/	/	/	Y	/	Y	/	/	Y	Y	/	/	/	/	/	Y	/	/	Y	/	/	/	/	/	Y	Y	/	/	Y	/	/	/	/	/	/	/	/	/	/	Y	/
K00787	/	/	/	/	/	/	/	/	/	/	/	/	/	/	/	/	/	/	/	/	/	/	/	/	/	/	/	/	/	/	/	/	/	/	/	/	/	/	/	/	/	/	/	/	/	/	/	/	/
K00788	/	/	Y	/	Y	Y	/	Y	Y	/	/	Y	Y	Y	/	/	Y	Y	Y	/	/	/	Y	/	Y	/	Y	Y	/	Y	/	Y	/	/	/	/	/	/	/	Y	Y	/	/	/	Y	/	Y	/	/
K00789	Y	Y	Y	Y	Y	Y	Y	Y	/	/	Y	Y	/	/	Y	/	Y	Y	/	Y	Y	Y	Y	Y	Y	Y	Y	Y	Y	Y	Y	Y	Y	Y	Y	Y	/	Y	Y	Y	Y	Y	Y	Y	Y	/	Y	Y	Y
K00790	Y	Y	Y	Y	Y	Y	Y	Y	Y	Y	Y	Y	/	Y	Y	Y	Y	Y	Y	Y	Y	Y	Y	/	Y	Y	Y	Y	Y	Y	/	Y	Y	Y	Y	Y	/	Y	/	Y	Y	Y	Y	Y	Y	Y	Y	/	Y
K00791	Y	/	Y	/	Y	Y	/	/	/	Y	/	Y	Y	Y	/	/	Y	Y	Y	Y	Y	Y	Y	Y	Y	Y	Y	Y	Y	Y	/	Y	Y	Y	Y	Y	Y	Y	Y	Y	Y	Y	Y	Y	Y	Y	Y	Y	Y
K00793	/	/	Y	/	Y	Y	/	/	Y	Y	/	Y	Y	Y	Y	/	Y	Y	Y	Y	Y	Y	Y	/	Y	/	Y	Y	/	/	Y	Y	Y	/	/	/	Y	Y	Y	Y	Y	Y	/	/	/	/	Y	/	/
K00794	/	/	Y	/	Y	Y	/	/	Y	/	/	Y	Y	Y	Y	/	Y	Y	Y	Y	/	Y	Y	/	/	/	Y	Y	/	/	Y	Y	Y	/	Y	/	Y	Y	Y	Y	Y	Y	/	/	/	Y	Y	Y	/
K00795	/	/	/	/	/	/	/	/	/	/	/	/	/	/	/	/	/	/	/	/	/	/	/	/	/	/	/	/	/	/	/	/	/	/	/	/	/	Y	/	/	/	Y	/	/	/	/	/	/	/
K00796	/	/	Y	/	Y	Y	/	Y	Y	/	/	Y	Y	Y	/	Y	Y	Y	Y	Y	Y	Y	Y	/	Y	/	Y	Y	/	Y	Y	Y	Y	/	/	/	Y	Y	/	Y	Y	Y	Y	Y	/	Y	Y	Y	Y
K00797	/	/	/	/	Y	Y	/	/	Y	/	Y	/	Y	Y	Y	Y	Y	/	/	Y	Y	/	Y	/	/	/	/	Y	/	/	/	Y	/	/	Y	/	/	Y	Y	/	Y	Y	Y	/	Y	/	Y	/	Y
K00798	/	/	/	/	/	/	/	Y	/	/	/	/	Y	/	/	/	/	/	/	Y	Y	Y	/	Y	Y	Y	Y	/	Y	Y	/	/	Y	/	/	/	Y	Y	Y	/	Y	Y	/	Y	/	/	Y	Y	/
K00799	/	/	/	/	/	/	/	/	/	/	/	/	/	/	/	/	/	/	/	/	/	/	/	/	/	/	/	/	/	/	/	/	/	/	/	/	/	/	/	/	/	/	/	/	/	/	/	/	/
K00800	/	/	Y	/	/	/	Y	/	/	Y	Y	Y	Y	Y	Y	/	Y	/	Y	/	Y	Y	/	Y	/	/	Y	Y	Y	Y	Y	Y	Y	Y	/	/	Y	/	Y	/	Y	/	Y	Y	Y	/	Y	Y	Y
K00801	/	/	/	/	/	/	/	/	/	/	/	/	/	/	/	/	/	/	/	/	/	/	/	/	/	/	/	/	/	/	/	/	/	/	/	/	/	/	/	/	Y	/	/	/	/	/	/	/	/
K00802	/	/	/	/	/	/	/	/	/	/	/	/	/	/	/	/	/	/	/	/	/	/	/	/	/	/	/	/	/	/	/	/	/	/	/	/	/	/	/	/	/	/	/	/	/	/	/	/	/
K00803	Y	/	/	/	/	/	/	/	/	/	/	/	/	/	/	/	/	/	/	/	/	/	/	/	/	/	Y	/	/	/	/	/	/	/	/	/	/	/	/	/	/	/	/	/	Y	/	/	/	/
K00804	/	/	/	/	/	/	/	/	/	/	/	/	/	/	/	/	/	/	/	/	/	/	/	/	/	/	/	/	/	/	/	/	/	/	/	/	/	/	/	/	/	/	/	/	/	/	/	/	/
K00805	Y	/	/	Y	Y	/	Y	Y	/	Y	/	/	/	Y	Y	Y	/	Y	Y	/	Y	/	/	/	Y	Y	/	Y	Y	/	/	Y	/	Y	/	/	/	Y	Y	/	/	Y	Y	/	Y	/	Y	/	Y
K00806	/	Y	Y	Y	Y	Y	Y	Y	Y	Y	/	Y	Y	Y	Y	Y	Y	Y	Y	Y	Y	Y	Y	Y	Y	Y	Y	Y	Y	Y	Y	Y	Y	Y	/	Y	Y	Y	Y	Y	Y	Y	Y	/	/	Y	Y	Y	Y
K00807	/	/	/	/	/	/	/	/	/	/	/	/	/	/	/	/	/	/	/	/	/	/	/	/	/	/	/	/	/	/	/	/	/	/	/	/	/	/	/	/	/	/	/	/	/	/	/	/	/
K00808	/	/	/	/	/	/	/	/	/	/	/	/	/	/	/	/	/	/	/	/	/	/	/	/	/	/	/	/	/	/	/	/	/	/	/	/	/	/	/	/	/	/	/	/	/	/	/	/	/
K00809	/	/	/	/	/	/	/	/	/	/	/	/	/	/	/	/	/	/	/	/	/	Y	/	/	/	/	/	/	/	/	Y	/	/	/	/	/	/	/	/	Y	Y	/	/	/	/	/	/	/	/
K00811	/	/	/	/	/	/	/	/	/	/	/	/	/	/	/	/	/	/	/	/	/	/	/	/	/	/	/	/	/	/	/	/	/	/	/	/	/	/	/	/	/	/	/	/	/	/	/	/	/
K00812	/	Y	Y	Y	/	Y	Y	/	Y	Y	Y	Y	Y	Y	Y	/	Y	Y	Y	Y	Y	Y	Y	Y	Y	/	Y	Y	/	Y	Y	Y	Y	/	Y	/	Y	Y	/	Y	Y	Y	Y	Y	Y	Y	Y	Y	/
K00813	/	/	/	/	/	/	/	/	/	/	/	/	/	/	/	/	/	/	/	/	/	Y	/	Y	/	/	/	/	/	/	/	/	/	/	/	/	/	/	Y	/	Y	/	/	/	/	/	/	/	/
K00814	/	/	/	/	/	/	/	/	/	/	/	/	/	/	/	/	/	/	/	/	/	/	/	/	/	/	/	/	/	/	/	/	/	/	/	/	/	/	/	/	/	/	/	/	/	/	/	/	/
K00815	/	/	/	/	/	/	/	/	/	/	/	/	/	/	/	/	/	/	/	/	/	/	/	/	/	/	/	/	/	/	/	/	/	/	/	/	/	/	/	/	/	/	/	/	/	/	/	/	/
K00816	/	/	/	/	/	/	/	/	/	/	/	/	/	/	/	/	/	/	/	/	/	/	/	/	/	/	/	/	/	/	/	/	/	/	/	/	/	/	/	/	/	/	/	/	/	/	/	/	/
K00817	/	Y	Y	Y	/	Y	Y	Y	/	Y	Y	Y	Y	Y	Y	Y	Y	/	Y	Y	Y	Y	Y	/	Y	Y	Y	Y	Y	Y	Y	Y	Y	Y	Y	/	Y	/	/	Y	Y	Y	Y	Y	Y	/	Y	Y	/
K00818	/	/	/	/	/	/	/	/	/	/	/	/	/	/	/	/	/	/	/	/	/	/	/	/	/	/	/	/	/	/	/	/	/	/	/	/	/	/	/	/	/	/	/	/	/	/	/	/	/
K00819	Y	/	/	/	/	Y	/	/	Y	/	/	/	/	/	/	/	/	/	/	/	/	/	/	/	Y	/	/	/	Y	/	/	/	Y	/	/	/	Y	Y	Y	/	/	Y	Y	Y	/	/	/	/	/
K00820	Y	Y	Y	Y	/	/	/	Y	/	/	/	Y	Y	Y	/	/	Y	Y	Y	Y	Y	/	Y	Y	Y	/	Y	Y	/	/	Y	Y	Y	Y	Y	/	/	Y	/	Y	Y	Y	Y	Y	/	/	Y	Y	Y
K00821	/	Y	Y	Y	Y	/	Y	/	/	Y	/	Y	Y	Y	/	Y	Y	/	Y	/	Y	Y	Y	Y	/	/	Y	Y	/	Y	Y	Y	Y	Y	Y	/	Y	/	/	Y	Y	/	Y	Y	Y	/	/	Y	Y
K00822	/	/	/	/	/	/	/	/	/	/	/	/	/	/	/	/	/	/	/	/	/	/	/	/	/	/	/	/	/	/	/	/	/	/	/	/	/	/	/	/	/	/	/	/	/	/	/	/	/
K00823	/	/	/	Y	/	Y	/	/	/	/	/	Y	/	/	/	Y	Y	/	/	Y	/	/	/	/	/	/	/	Y	/	/	/	/	/	/	Y	/	/	/	/	/	/	/	/	/	/	/	Y	Y	/
K00824	/	/	/	/	/	/	/	/	/	Y	/	/	/	/	/	/	/	/	/	/	/	Y	/	Y	/	/	/	/	/	/	/	/	Y	/	/	/	/	/	/	/	/	/	/	/	/	/	/	/	/
K00825	/	/	/	/	/	/	/	/	/	/	/	/	/	/	/	/	/	/	/	/	/	/	/	/	/	/	/	/	/	/	/	/	/	/	/	/	/	/	/	/	/	/	/	/	/	/	/	/	/
K00826	/	Y	Y	/	Y	Y	Y	Y	Y	Y	/	Y	Y	Y	Y	Y	Y	/	Y	Y	Y	Y	Y	/	/	Y	Y	Y	Y	Y	Y	Y	Y	Y	Y	Y	Y	/	Y	Y	Y	Y	Y	/	Y	/	Y	Y	Y
K00827	/	/	/	/	/	/	/	/	/	/	/	/	Y	/	/	/	/	/	/	/	/	/	/	/	/	/	/	/	/	/	/	/	/	/	/	/	/	/	/	/	/	/	/	/	/	/	/	/	/
K00830	/	Y	/	/	Y	/	Y	/	Y	Y	Y	/	/	Y	/	/	/	/	Y	Y	/	/	/	Y	/	/	Y	/	Y	Y	/	/	/	/	/	/	/	/	/	/	/	/	/	/	/	/	Y	/	Y
K00831	/	/	Y	/	/	Y	/	Y	/	/	/	Y	Y	/	/	Y	/	Y	/	/	Y	Y	Y	/	Y	Y	Y	Y	Y	/	/	/	Y	Y	/	/	Y	Y	/	/	Y	Y	Y	Y	/	Y	/	/	/
K00832	/	/	/	/	/	/	/	/	/	/	/	/	/	/	/	/	/	/	/	/	/	/	/	/	/	/	/	/	/	/	/	/	/	/	/	/	/	/	/	/	/	/	/	/	/	/	/	/	/
K00833	/	/	/	/	/	/	/	/	/	/	/	/	/	/	/	/	/	/	/	/	/	/	/	Y	/	/	Y	/	/	/	/	/	/	/	/	/	/	/	/	Y	/	/	/	/	/	/	Y	/	/
K00835	/	/	/	/	/	/	/	/	/	/	/	/	/	/	/	/	/	/	/	/	/	/	/	/	/	/	/	/	/	/	/	/	/	/	/	/	/	/	/	/	/	/	/	/	/	/	/	/	/
K00836	/	/	/	/	/	/	/	/	/	/	/	/	/	/	/	/	/	/	/	Y	/	/	/	/	/	/	Y	/	/	/	Y	/	/	/	/	/	/	/	/	/	/	/	/	/	/	/	/	/	/
K00838	/	/	/	/	/	/	/	/	/	/	/	/	/	/	/	/	/	/	/	/	/	/	/	/	/	/	/	/	/	/	/	/	/	/	/	/	/	/	/	/	/	/	/	/	/	/	/	/	/
K00839	/	/	/	/	/	/	/	/	/	/	/	/	/	/	/	/	/	/	/	/	/	/	/	/	/	/	/	/	/	/	/	/	/	/	/	/	/	/	/	/	/	/	/	/	/	/	/	/	/
K00840	/	/	/	/	/	/	/	/	/	/	/	/	/	/	/	/	/	/	/	/	/	/	/	/	/	/	/	/	/	/	/	/	/	/	/	/	/	/	/	/	/	/	/	/	/	/	/	/	/
K00841	/	/	/	/	/	/	/	/	/	/	/	/	/	/	/	/	/	/	/	/	/	/	/	/	/	/	/	/	/	/	/	/	/	/	/	/	/	Y	/	/	/	/	/	/	/	/	/	/	/
K00842	/	/	/	/	/	/	/	/	/	/	/	/	/	/	/	/	/	/	/	/	/	/	/	/	/	/	/	/	/	/	/	/	/	/	/	/	/	/	/	/	/	/	/	/	/	/	/	/	/
K00844	/	/	/	/	/	/	/	/	/	/	/	/	/	/	/	/	/	/	/	/	/	Y	/	/	/	/	/	/	/	/	/	/	Y	/	/	/	/	/	/	/	/	/	/	/	/	/	/	/	/
K00845	Y	Y	Y	/	Y	Y	/	Y	/	Y	Y	Y	Y	Y	/	Y	Y	Y	Y	Y	/	Y	Y	Y	Y	Y	Y	Y	/	Y	Y	Y	Y	Y	Y	Y	Y	Y	Y	Y	Y	Y	/	Y	Y	Y	Y	Y	Y
K00846	/	/	/	/	/	/	/	/	/	/	/	/	/	/	/	/	/	/	/	/	/	/	/	/	/	/	/	/	/	/	/	/	/	/	/	/	/	/	/	/	/	/	/	/	/	/	/	/	/
K00847	/	Y	/	/	/	/	/	/	Y	/	/	/	/	Y	/	Y	Y	/	Y	/	Y	/	/	Y	/	Y	Y	/	/	Y	/	/	Y	/	Y	Y	/	/	/	/	Y	/	Y	Y	Y	Y	/	/	Y
K00848	/	Y	Y	/	/	/	/	/	/	Y	/	Y	/	/	/	/	Y	/	/	/	/	/	/	/	/	/	Y	/	/	/	/	/	/	/	/	Y	Y	/	/	/	/	/	/	/	Y	/	/	Y	Y
K00849	/	Y	Y	/	/	/	/	Y	/	Y	/	Y	/	Y	/	Y	Y	Y	Y	/	/	Y	/	/	/	Y	Y	/	Y	/	/	/	Y	Y	Y	Y	Y	/	/	/	Y	/	/	/	/	/	/	Y	Y
K00850	Y	Y	Y	Y	Y	/	Y	/	Y	Y	/	Y	/	Y	Y	Y	/	Y	/	Y	Y	Y	Y	Y	/	Y	Y	Y	Y	/	/	Y	Y	Y	/	Y	Y	/	Y	Y	Y	/	Y	/	/	/	Y	/	Y
K00851	/	/	/	/	/	/	/	/	/	Y	/	/	/	/	/	/	/	/	/	/	Y	/	/	/	/	/	/	/	Y	/	/	/	/	/	/	/	/	/	/	/	/	/	Y	/	Y	/	/	/	/
K00852	Y	Y	Y	/	/	Y	/	Y	Y	Y	Y	Y	/	Y	/	Y	Y	Y	Y	/	Y	Y	Y	Y	Y	Y	Y	/	Y	/	/	/	Y	Y	Y	Y	/	Y	Y	/	Y	Y	Y	/	Y	/	/	Y	Y
K00853	/	Y	Y	/	/	/	/	Y	Y	Y	/	Y	/	Y	/	Y	Y	/	/	/	Y	Y	/	Y	/	/	Y	/	/	/	/	/	/	Y	/	Y	Y	/	/	/	Y	/	Y	/	/	/	/	Y	/
K00854	/	Y	Y	Y	/	/	/	Y	Y	Y	/	Y	/	Y	/	Y	Y	/	Y	/	Y	Y	/	Y	/	Y	Y	/	Y	Y	/	/	Y	Y	Y	Y	Y	/	/	/	Y	/	Y	/	Y	/	/	Y	Y
K00855	/	/	/	/	/	/	/	Y	/	/	/	/	/	/	/	/	/	/	/	/	/	/	/	/	/	/	/	/	/	/	/	/	/	/	/	/	/	/	/	/	/	/	Y	/	/	/	/	/	/
K00856	/	Y	/	/	/	/	/	/	/	/	/	/	Y	Y	/	/	Y	/	Y	/	/	Y	Y	Y	/	/	Y	/	/	/	/	/	/	/	/	/	/	/	/	Y	Y	/	/	/	/	/	/	/	/
K00857	Y	Y	/	/	/	Y	Y	Y	Y	/	Y	/	/	/	/	/	/	/	/	/	/	Y	/	Y	Y	Y	/	/	Y	/	/	/	Y	/	/	Y	Y	Y	Y	/	/	Y	Y	Y	/	Y	/	/	/
K00858	Y	Y	Y	Y	Y	Y	Y	Y	Y	Y	Y	Y	Y	Y	/	Y	Y	Y	Y	Y	Y	Y	Y	/	Y	Y	Y	Y	Y	Y	Y	Y	Y	Y	Y	/	Y	Y	Y	Y	Y	Y	Y	Y	Y	Y	Y	Y	Y
K00859	Y	Y	Y	Y	/	Y	Y	Y	/	Y	Y	Y	Y	Y	Y	Y	Y	Y	Y	/	Y	Y	Y	/	Y	Y	/	Y	Y	Y	/	Y	Y	Y	/	Y	Y	Y	Y	/	Y	/	Y	Y	Y	Y	Y	/	Y
K00860	/	/	/	/	/	/	/	/	/	Y	/	/	Y	Y	/	/	Y	Y	Y	/	/	/	/	/	/	/	Y	/	/	/	Y	/	/	/	/	/	/	/	/	Y	Y	/	/	/	/	/	/	Y	/
K00861	/	/	/	/	/	/	/	/	/	/	/	/	/	/	/	/	/	/	/	/	/	/	/	/	/	/	/	/	/	/	/	/	/	/	/	/	/	/	/	/	/	/	/	/	/	/	/	/	/
K00862	/	/	/	/	/	/	/	/	/	/	/	/	/	/	/	/	/	/	/	/	/	/	/	/	/	/	/	/	/	/	/	/	/	/	/	/	/	/	/	/	/	/	/	/	/	/	/	/	/
K00863	/	/	/	/	/	/	/	/	/	/	/	/	/	/	/	/	/	/	/	/	/	/	/	/	/	/	/	/	/	/	/	/	/	/	/	/	/	/	/	/	/	/	/	/	/	/	/	/	/
K00864	Y	Y	/	/	/	/	/	Y	/	Y	/	/	/	Y	/	Y	/	/	/	/	/	Y	/	Y	/	Y	Y	/	/	/	/	/	/	/	Y	Y	/	/	Y	/	Y	/	Y	/	Y	/	/	/	Y
K00865	Y	/	Y	/	/	/	Y	Y	/	Y	Y	Y	/	Y	/	/	Y	/	/	/	/	/	/	/	/	/	/	/	Y	/	/	/	/	Y	/	/	/	/	Y	/	Y	/	Y	Y	Y	/	/	/	Y
K00866	/	/	/	/	/	/	/	/	/	/	/	/	/	/	/	/	/	/	/	/	/	/	/	/	/	/	/	/	/	/	/	/	/	/	/	/	/	/	/	/	/	/	/	/	/	/	/	/	/
K00867	/	/	/	/	/	/	/	Y	/	/	/	/	/	/	/	/	/	/	/	/	Y	/	/	/	/	/	/	/	/	/	/	/	/	/	/	/	Y	/	/	/	/	/	Y	/	/	/	/	/	/
K00868	Y	/	/	/	Y	/	/	/	/	/	/	/	/	/	/	/	/	/	/	/	/	/	/	/	Y	/	/	/	/	/	/	/	/	/	/	/	/	Y	/	/	/	Y	Y	/	/	/	Y	/	/
K00869	/	Y	/	/	/	/	/	/	/	/	/	/	/	/	/	/	/	/	/	/	/	Y	/	Y	/	/	/	/	/	/	Y	/	/	/	/	/	/	/	/	/	/	/	/	/	/	/	/	/	/
K00870	/	/	/	/	/	/	/	/	/	/	/	/	/	/	/	/	/	/	/	/	/	/	/	/	/	/	/	/	/	/	/	/	/	/	/	/	/	/	/	/	/	/	/	/	/	/	/	/	/
K00871	/	/	/	/	/	/	/	/	/	/	/	/	/	/	/	/	/	/	/	/	/	/	/	/	/	/	/	/	/	/	/	/	/	/	/	/	/	/	/	/	/	/	/	/	/	/	/	/	/
K00872	/	/	/	/	Y	/	Y	/	/	Y	/	Y	/	Y	/	/	Y	/	Y	Y	/	/	/	/	/	/	/	/	/	/	/	Y	/	/	Y	Y	/	/	Y	/	/	/	Y	/	/	/	Y	/	/
K00873	Y	/	Y	Y	Y	Y	Y	Y	/	Y	Y	Y	Y	Y	Y	/	Y	/	Y	Y	Y	Y	Y	/	/	Y	/	Y	Y	Y	/	/	Y	/	Y	/	Y	/	Y	Y	Y	/	Y	/	Y	/	Y	/	Y
K00874	/	Y	Y	/	/	/	Y	/	Y	Y	/	Y	/	Y	/	Y	Y	/	/	/	Y	Y	/	Y	/	Y	Y	/	Y	Y	/	/	Y	Y	Y	/	Y	/	/	/	Y	/	Y	/	/	/	/	/	Y
K00875	/	/	/	/	/	/	/	/	/	/	/	/	/	/	/	/	/	/	/	/	/	/	/	/	/	/	/	/	/	/	/	/	/	/	/	/	/	/	/	/	/	/	/	/	/	/	/	/	/
K00876	Y	Y	/	/	/	/	/	Y	/	Y	Y	/	/	Y	/	/	/	Y	/	Y	/	Y	/	Y	Y	Y	/	/	Y	Y	/	/	Y	Y	/	Y	Y	Y	Y	/	Y	Y	Y	Y	/	Y	Y	Y	Y
K00877	/	/	/	/	/	/	/	/	/	/	/	/	/	/	/	/	/	/	/	/	/	/	/	/	/	/	/	/	/	/	/	/	/	/	/	/	/	/	/	/	/	/	/	/	/	/	/	/	/
K00878	/	/	Y	/	Y	/	/	/	/	/	/	Y	Y	Y	Y	/	/	Y	/	/	Y	/	/	/	/	/	/	Y	/	Y	/	/	/	/	/	/	/	/	/	Y	/	/	/	/	Y	/	Y	/	/
K00879	/	/	/	/	/	/	/	/	/	/	/	/	/	Y	/	/	Y	/	Y	/	/	/	/	/	/	/	/	/	/	/	/	/	Y	/	Y	/	/	/	/	/	/	/	/	/	Y	/	/	/	/
K00880	/	/	/	/	/	/	/	/	/	Y	/	/	/	/	/	/	/	/	/	/	/	/	/	/	/	/	Y	/	/	/	/	/	/	/	/	/	/	/	/	/	/	/	/	/	/	/	/	/	/
K00881	/	/	/	/	/	/	/	/	/	/	/	/	/	/	/	/	/	/	/	/	/	/	/	/	/	/	/	/	/	/	/	/	/	/	/	/	/	/	/	/	/	/	/	/	/	/	/	/	/
K00882	/	/	Y	/	/	/	/	Y	/	Y	/	/	/	Y	/	/	Y	/	/	Y	/	/	/	Y	/	Y	/	/	Y	Y	/	/	/	Y	Y	/	/	/	/	/	/	/	Y	/	Y	/	/	/	Y
K00883	/	/	/	/	/	/	/	/	/	/	/	/	/	/	/	/	Y	/	/	/	Y	/	/	/	/	/	/	/	/	/	/	/	/	/	/	/	/	/	/	/	/	/	/	/	/	/	/	/	/
K00884	/	/	/	/	/	/	/	/	/	/	/	Y	/	/	/	/	/	/	/	/	/	/	/	/	/	/	/	/	/	/	/	/	/	/	/	/	/	/	/	/	/	/	/	/	/	/	/	/	/
K00885	/	/	/	/	/	/	/	/	/	/	/	/	/	/	/	/	/	/	/	/	/	/	/	/	/	/	/	/	/	/	/	/	/	/	/	/	/	/	/	/	/	/	/	/	/	/	/	/	/
K00886	/	/	/	/	/	/	/	Y	/	/	/	/	/	/	/	/	/	/	Y	/	Y	/	/	/	/	/	/	/	/	/	/	/	/	/	/	/	/	/	/	/	/	/	Y	/	/	/	/	/	/
K00887	/	Y	/	/	/	/	/	/	/	/	/	/	/	/	/	/	/	/	/	/	/	/	/	/	/	Y	/	/	/	/	/	/	/	Y	/	/	/	/	/	/	/	/	/	/	/	/	/	/	/
K00888	/	/	/	/	/	/	/	/	/	/	/	/	/	/	/	/	/	/	/	/	/	/	/	/	/	/	/	/	/	/	/	/	/	/	/	/	/	/	/	/	/	/	/	/	/	/	/	/	/
K00889	/	/	/	/	/	/	/	/	/	/	/	/	/	/	/	/	/	/	/	/	/	/	/	/	/	/	/	/	/	/	/	/	/	/	/	/	/	/	/	/	/	/	/	/	/	/	/	/	/
K00891	/	/	Y	/	Y	/	/	Y	/	/	/	/	Y	/	Y	/	/	/	/	/	Y	Y	Y	/	/	/	Y	Y	/	/	Y	Y	Y	Y	/	Y	Y	/	/	Y	Y	Y	Y	Y	Y	/	/	Y	/
K00892	/	/	/	/	/	/	/	/	/	/	/	/	/	/	/	/	/	/	/	/	/	/	/	/	/	/	/	/	/	/	/	/	/	/	/	/	/	/	/	/	/	/	/	/	/	/	/	/	/
K00893	/	/	/	/	/	/	/	/	/	/	/	/	/	/	/	/	/	/	/	/	/	/	/	/	/	/	/	/	/	/	/	/	/	/	/	/	/	/	/	/	/	/	/	/	/	/	/	/	/
K00894	/	/	/	/	/	/	/	/	/	/	/	/	/	/	/	/	/	/	/	/	/	/	/	/	/	/	/	/	/	/	/	/	/	/	/	/	/	/	/	/	/	/	/	/	/	/	/	/	/
K00895	/	/	/	/	/	/	/	Y	/	/	/	Y	/	/	/	/	/	/	/	/	Y	Y	/	/	/	/	/	/	/	/	/	/	/	/	/	/	Y	/	/	/	/	/	Y	/	/	/	/	Y	/
K00897	/	/	/	/	/	/	/	/	/	/	/	/	/	/	/	/	/	/	/	/	/	/	/	/	/	/	/	/	/	/	/	/	/	/	/	/	/	/	/	/	/	/	/	/	/	/	/	/	/
K00898	/	/	/	/	/	/	/	/	/	/	/	/	/	/	/	/	/	/	/	/	/	/	/	/	/	/	/	/	/	/	/	/	/	/	/	/	/	/	/	/	/	/	/	/	/	/	/	/	/
K00899	/	/	Y	/	/	/	/	/	/	/	/	/	/	/	/	/	/	/	/	/	/	/	/	/	/	Y	/	/	/	/	/	/	/	/	/	/	/	/	/	/	/	/	/	/	/	/	/	/	/
K00900	/	/	/	/	/	/	/	/	/	/	/	/	/	/	/	/	/	/	/	/	/	/	/	/	/	/	/	/	/	/	/	/	/	/	/	/	/	/	/	/	/	/	/	/	/	/	/	/	/
K00901	Y	/	Y	/	Y	/	Y	/	/	Y	/	Y	/	Y	/	/	/	Y	Y	/	/	/	Y	Y	/	/	Y	/	Y	/	/	Y	Y	/	Y	/	Y	/	/	/	Y	/	/	/	/	/	Y	Y	/
K00902	/	/	/	/	/	/	/	/	/	/	/	/	/	/	/	/	/	/	/	/	/	/	/	/	/	/	/	/	/	/	/	/	/	/	/	/	/	/	/	/	/	/	/	/	/	/	/	/	/
K00903	Y	/	/	Y	/	/	Y	/	/	/	/	/	Y	/	/	/	/	/	/	/	/	/	/	/	/	Y	/	/	/	/	/	/	/	/	/	/	/	/	/	/	/	/	/	/	/	/	/	/	/
K00904	/	/	/	/	/	/	/	/	/	/	/	/	/	/	/	/	/	/	/	/	/	/	/	/	/	/	/	/	/	/	/	/	/	/	/	/	/	/	/	/	/	/	/	/	/	/	/	/	/
K00905	/	/	/	/	/	/	/	/	/	/	/	/	/	/	/	/	/	/	/	/	/	/	/	/	/	/	/	/	/	/	/	/	/	/	/	/	/	/	/	/	/	/	/	/	/	/	/	/	/
K00906	/	/	/	/	/	/	/	/	/	/	/	/	/	/	/	/	/	/	/	/	/	/	/	/	/	/	/	/	/	/	/	/	/	/	/	/	/	/	/	/	/	/	/	/	/	/	/	/	/
K00907	/	/	/	/	/	/	/	/	/	/	/	/	/	/	/	/	/	/	/	/	/	/	/	/	/	/	/	/	/	/	/	/	/	/	/	/	/	/	/	/	/	/	/	/	/	/	/	/	/
K00909	/	/	/	/	/	/	/	/	/	/	/	/	/	/	/	/	/	/	/	/	/	/	/	/	/	/	/	/	/	/	/	/	/	/	/	/	/	/	/	/	/	/	/	/	/	/	/	/	/
K00910	/	/	/	/	/	/	/	/	/	/	/	/	/	/	/	/	/	/	/	/	/	/	/	/	/	/	/	/	/	/	/	/	/	/	/	/	/	/	/	/	/	/	/	/	/	/	/	/	/
K00911	/	/	/	/	/	/	/	/	/	/	/	/	/	/	/	/	/	/	/	/	/	/	/	/	/	/	/	/	/	/	/	/	/	/	/	/	/	/	/	/	/	/	/	/	/	/	/	/	/
K00912	/	/	Y	/	/	Y	/	/	/	/	/	Y	Y	Y	/	/	Y	Y	Y	Y	/	Y	Y	/	/	/	Y	/	/	/	/	/	Y	/	Y	/	Y	Y	/	Y	Y	Y	/	Y	/	Y	Y	Y	/
K00913	/	/	/	/	/	/	/	/	/	/	/	/	/	/	/	/	/	/	/	/	/	/	/	/	/	/	/	/	/	/	/	/	/	/	/	/	/	/	/	/	/	/	/	/	/	/	/	/	/
K00914	/	/	/	/	/	/	/	/	/	/	/	/	/	/	/	/	/	/	/	/	/	/	/	/	/	/	/	/	/	/	/	/	/	/	/	/	/	/	/	/	/	/	/	/	/	/	/	/	/
K00915	/	/	/	/	/	/	/	/	/	/	/	/	/	/	/	/	/	/	/	/	/	/	/	/	/	/	/	/	/	/	/	/	/	/	/	/	/	/	/	/	/	/	/	/	/	/	/	/	/
K00916	/	/	/	/	/	/	/	/	/	/	/	/	/	/	/	/	/	/	/	/	/	/	/	/	/	/	/	/	/	/	/	/	/	/	/	/	/	/	/	/	/	/	/	/	/	/	/	/	/
K00917	/	/	Y	/	/	/	/	/	/	/	/	Y	/	/	/	/	/	/	/	/	/	/	/	Y	/	/	Y	/	/	/	/	/	/	/	/	/	/	/	/	/	Y	/	/	/	Y	/	/	Y	/
K00918	/	/	/	/	/	/	/	/	/	Y	/	/	/	/	/	/	/	/	/	/	/	/	/	/	/	/	/	/	/	/	/	/	/	/	/	/	/	/	/	/	/	/	/	/	/	/	/	/	/
K00919	Y	/	Y	Y	Y	Y	Y	Y	/	Y	Y	Y	Y	Y	Y	Y	Y	/	Y	Y	Y	Y	Y	/	Y	Y	/	Y	Y	Y	/	Y	Y	Y	Y	Y	Y	/	Y	Y	Y	Y	Y	Y	Y	/	Y	/	Y
K00920	/	/	/	/	/	/	/	/	/	/	/	/	/	/	/	/	/	/	/	/	/	/	/	/	/	/	/	/	/	/	/	/	/	/	/	/	/	/	/	/	/	/	/	/	/	/	/	/	/
K00921	/	/	/	/	/	/	/	/	/	/	/	/	/	/	/	/	/	/	/	/	/	/	/	/	/	/	/	/	/	/	/	/	/	/	/	/	/	/	/	/	/	/	/	/	/	/	/	/	/
K00922	/	/	/	/	/	/	/	/	/	/	/	/	/	/	/	/	/	/	/	/	/	/	/	/	/	/	/	/	/	/	/	/	/	/	/	/	/	/	/	/	/	/	/	/	/	/	/	/	/
K00923	/	/	/	/	/	/	/	/	/	/	/	/	/	/	/	/	/	/	/	/	/	/	/	/	/	/	/	/	/	/	/	/	/	/	/	/	/	/	/	/	/	/	/	/	/	/	/	/	/
K00924	/	/	/	/	/	/	/	/	/	/	/	/	/	/	/	/	/	/	/	/	/	/	/	/	/	/	/	/	/	/	/	/	/	/	/	/	/	/	/	/	/	/	/	/	/	/	/	/	/
K00925	Y	/	Y	Y	/	Y	Y	/	Y	Y	Y	Y	/	Y	Y	/	Y	Y	Y	Y	Y	/	Y	/	Y	Y	Y	/	Y	/	/	/	Y	Y	/	Y	Y	Y	Y	/	Y	Y	Y	Y	Y	Y	Y	Y	Y
K00926	Y	/	/	Y	/	Y	Y	/	/	/	Y	/	Y	/	/	/	/	Y	/	Y	/	/	/	Y	/	Y	/	/	Y	Y	Y	/	Y	/	/	Y	/	Y	Y	/	/	Y	Y	/	/	Y	Y	/	/
K00927	Y	Y	Y	Y	Y	Y	Y	Y	/	Y	Y	Y	Y	Y	/	/	Y	Y	/	Y	Y	Y	Y	Y	Y	Y	Y	Y	Y	Y	Y	Y	Y	Y	/	Y	Y	Y	Y	Y	Y	Y	Y	Y	Y	/	Y	Y	/
K00928	Y	Y	Y	Y	Y	Y	Y	Y	/	Y	Y	Y	Y	Y	Y	/	/	Y	/	Y	Y	Y	Y	Y	/	Y	Y	Y	Y	Y	Y	Y	Y	Y	Y	Y	Y	Y	/	Y	Y	/	Y	/	Y	Y	Y	Y	Y
K00929	Y	/	/	Y	/	Y	Y	/	/	/	Y	/	/	/	/	Y	/	Y	/	Y	/	/	/	/	Y	Y	/	/	Y	Y	/	Y	Y	/	/	Y	/	Y	Y	/	/	Y	/	Y	/	Y	Y	/	/
K00930	/	Y	Y	/	Y	/	Y	/	/	Y	Y	Y	Y	Y	Y	Y	Y	/	/	/	Y	Y	Y	Y	/	/	Y	Y	/	/	/	Y	/	Y	Y	/	Y	/	/	Y	Y	/	Y	Y	Y	/	/	Y	Y
K00931	/	Y	Y	/	Y	/	Y	/	/	Y	/	Y	Y	Y	Y	Y	Y	/	Y	/	/	Y	Y	Y	/	/	Y	Y	/	/	/	Y	Y	Y	/	Y	Y	/	/	Y	Y	/	Y	/	Y	/	/	Y	Y
K00932	/	/	/	/	/	/	/	/	/	/	/	/	/	/	/	/	/	/	/	/	/	/	/	/	/	/	/	/	/	/	/	/	/	/	/	/	/	/	/	/	/	/	/	/	/	/	/	/	/
K00933	/	/	/	/	/	/	/	/	/	/	/	/	/	/	/	/	/	/	/	/	/	/	/	/	/	/	/	/	/	/	/	/	/	/	/	/	/	/	/	/	/	/	/	/	/	/	/	/	/
K00934	/	/	/	/	/	/	/	/	/	/	/	/	/	/	/	/	/	/	/	/	/	/	/	/	/	/	/	/	/	/	/	/	/	/	/	/	/	/	/	/	/	/	/	/	/	/	/	/	/
K00936	/	/	/	/	/	/	/	/	/	/	/	/	/	/	/	/	/	/	/	/	Y	/	/	Y	/	/	/	/	/	/	/	/	/	/	/	/	/	/	/	/	/	/	Y	/	/	/	/	/	/
K00937	/	/	/	/	/	Y	/	Y	/	/	/	/	/	/	/	Y	Y	/	/	/	Y	Y	/	Y	/	/	Y	/	/	/	/	/	Y	Y	/	Y	Y	/	/	/	Y	/	Y	/	/	/	/	Y	Y
K00938	/	/	/	/	/	/	/	/	/	/	/	/	/	/	/	/	/	/	/	/	/	/	/	/	/	/	/	/	/	/	/	/	/	/	/	/	/	/	/	/	/	/	/	/	/	/	/	/	/
K00939	Y	Y	Y	Y	Y	Y	Y	Y	Y	Y	Y	Y	Y	Y	Y	Y	Y	Y	Y	Y	Y	Y	Y	/	Y	Y	Y	Y	Y	Y	Y	Y	Y	Y	Y	Y	Y	/	Y	/	Y	Y	Y	Y	Y	Y	Y	Y	Y
K00940	Y	Y	Y	Y	Y	Y	/	/	Y	Y	Y	Y	Y	/	Y	/	/	/	/	/	Y	Y	Y	Y	Y	/	Y	Y	/	/	Y	Y	Y	/	/	/	Y	Y	/	Y	Y	Y	Y	/	/	Y	/	/	/
K00941	/	/	Y	/	Y	Y	/	/	Y	/	/	Y	Y	Y	Y	/	Y	/	Y	/	/	/	Y	/	Y	/	/	Y	/	Y	/	/	/	/	/	/	/	/	/	Y	Y	/	/	/	Y	Y	Y	/	/
K00942	Y	Y	Y	Y	/	Y	Y	Y	Y	Y	Y	Y	Y	Y	Y	Y	Y	/	Y	/	Y	Y	Y	Y	Y	Y	Y	Y	Y	/	/	Y	Y	Y	Y	Y	Y	Y	Y	Y	Y	Y	Y	/	Y	Y	Y	/	Y
K00943	Y	Y	Y	Y	Y	Y	Y	Y	Y	Y	Y	Y	/	Y	Y	Y	Y	Y	Y	Y	Y	/	Y	Y	Y	Y	Y	Y	Y	/	Y	Y	Y	Y	Y	/	/	Y	Y	/	Y	Y	Y	Y	Y	Y	Y	Y	Y
K00944	/	/	/	/	/	/	/	/	/	/	/	/	/	/	/	/	/	/	/	/	/	/	/	/	/	/	/	/	/	/	/	/	/	/	/	/	/	/	/	/	/	/	/	/	/	/	/	/	/
K00945	Y	Y	Y	/	Y	Y	/	/	/	Y	/	Y	Y	Y	/	Y	Y	Y	/	Y	Y	Y	Y	/	Y	Y	Y	Y	Y	Y	Y	Y	Y	Y	Y	Y	Y	Y	/	Y	Y	Y	Y	Y	Y	/	Y	Y	Y
K00946	/	/	Y	/	/	Y	/	Y	/	/	/	Y	Y	Y	/	/	Y	Y	Y	/	Y	Y	Y	/	/	/	Y	Y	/	/	Y	Y	Y	/	Y	/	Y	/	/	Y	Y	/	Y	Y	Y	Y	/	/	/
K00947	/	/	/	/	/	/	/	/	/	/	/	/	/	/	/	/	/	/	/	/	/	/	/	/	/	/	/	Y	/	/	/	Y	/	/	/	/	/	/	/	Y	/	/	/	/	/	/	/	/	/
K00948	Y	Y	Y	Y	Y	Y	Y	Y	Y	Y	Y	Y	Y	Y	Y	Y	Y	Y	Y	Y	Y	Y	/	Y	Y	Y	Y	Y	Y	Y	Y	Y	Y	Y	Y	Y	Y	Y	Y	Y	Y	Y	Y	Y	Y	Y	/	Y	Y
K00949	Y	Y	/	Y	/	/	Y	/	/	Y	Y	/	/	/	/	Y	/	/	/	Y	/	/	/	/	Y	Y	/	/	Y	Y	/	/	Y	Y	/	/	Y	Y	/	/	/	Y	/	Y	/	/	Y	Y	Y
K00950	/	Y	Y	/	Y	Y	/	Y	Y	Y	/	Y	Y	Y	/	Y	/	Y	Y	Y	/	Y	Y	/	Y	/	/	Y	/	Y	/	Y	Y	/	Y	/	Y	Y	/	Y	Y	Y	/	Y	/	/	Y	Y	/
K00951	Y	Y	Y	Y	Y	Y	/	Y	Y	Y	Y	Y	Y	Y	/	Y	Y	/	/	Y	/	Y	Y	Y	/	Y	/	Y	Y	Y	/	Y	Y	Y	/	/	Y	/	Y	Y	Y	/	Y	Y	Y	Y	/	Y	Y
K00952	/	/	/	/	/	/	/	/	/	/	/	/	Y	/	/	/	/	/	/	/	/	/	/	/	/	/	/	/	/	/	Y	/	/	/	/	/	/	/	/	/	/	/	/	/	/	/	/	/	/
K00953	/	/	/	/	/	/	/	/	/	/	/	/	/	/	/	/	/	/	/	/	/	/	/	/	/	/	/	/	/	/	/	/	/	/	/	/	/	/	/	/	/	/	/	/	/	/	/	/	/
K00954	Y	Y	Y	Y	Y	Y	Y	Y	/	Y	/	Y	Y	Y	Y	Y	Y	Y	/	Y	Y	Y	Y	Y	Y	/	Y	Y	Y	/	/	Y	Y	Y	/	Y	Y	Y	Y	Y	Y	Y	Y	Y	Y	Y	Y	Y	Y
K00955	/	/	/	/	/	/	/	/	/	/	/	Y	/	/	/	/	/	/	/	/	/	Y	/	/	/	/	/	/	/	/	/	/	/	/	/	/	/	/	/	/	/	/	/	/	/	/	/	/	/
K00956	/	/	/	/	/	/	/	/	/	/	/	/	/	/	/	/	/	/	/	/	Y	/	/	/	/	/	/	/	/	/	/	/	/	/	/	/	/	/	/	/	/	/	/	/	/	/	/	/	/
K00957	/	/	/	/	/	/	/	/	/	/	/	Y	/	/	/	/	/	/	/	/	/	Y	/	/	/	/	/	/	/	/	/	/	/	/	/	/	/	/	/	/	/	/	/	/	/	/	/	/	/
K00958	/	/	/	/	/	/	/	/	/	Y	/	/	Y	Y	/	/	Y	Y	Y	/	/	/	Y	/	/	/	/	/	/	/	/	/	/	/	Y	/	/	/	/	Y	Y	/	/	/	/	/	/	/	/
K00960	/	/	/	/	/	/	/	/	/	/	/	/	/	/	/	/	/	/	/	/	/	/	/	/	/	/	/	/	/	/	/	/	/	/	/	/	/	/	/	/	/	/	/	/	/	/	/	/	/
K00962	Y	Y	Y	Y	Y	Y	/	Y	Y	Y	Y	Y	Y	Y	Y	Y	Y	Y	Y	Y	Y	/	/	/	Y	Y	Y	Y	Y	Y	/	Y	Y	Y	/	Y	Y	Y	Y	Y	Y	Y	Y	Y	Y	/	Y	/	Y
K00963	Y	Y	Y	/	/	/	Y	Y	/	/	/	Y	/	Y	Y	/	Y	/	/	Y	/	/	Y	Y	Y	/	Y	Y	/	Y	/	Y	/	Y	/	/	/	Y	Y	Y	/	Y	Y	/	/	Y	Y	Y	/
K00965	/	/	Y	/	Y	Y	/	/	Y	Y	/	Y	/	Y	Y	/	Y	/	/	/	/	/	Y	Y	/	/	Y	Y	Y	/	Y	Y	/	Y	/	/	/	/	/	/	/	/	/	/	Y	/	/	Y	/
K00966	/	/	/	/	/	/	/	/	/	/	/	/	/	/	/	/	Y	/	Y	/	/	/	/	/	/	/	/	/	/	/	/	/	/	/	/	/	Y	Y	/	/	/	/	/	/	/	/	/	/	/
K00967	/	/	/	/	/	/	/	/	/	/	/	/	/	/	/	/	/	/	/	/	/	/	/	/	/	/	/	/	/	/	/	/	/	/	/	/	/	/	/	/	/	/	/	/	/	/	/	/	/
K00968	/	/	/	/	/	/	/	Y	/	/	/	/	/	/	/	/	/	/	/	/	/	/	/	/	/	/	/	/	/	/	/	/	/	/	/	/	/	/	/	/	/	/	/	/	/	/	/	/	/
K00969	Y	Y	Y	Y	Y	Y	/	/	Y	Y	Y	Y	Y	Y	Y	/	Y	Y	Y	Y	Y	Y	Y	/	Y	Y	Y	Y	Y	Y	/	Y	Y	Y	Y	Y	Y	Y	Y	Y	Y	Y	Y	/	Y	Y	Y	Y	Y
K00970	/	/	Y	Y	/	/	/	Y	/	/	/	/	/	Y	/	/	/	Y	Y	/	/	Y	Y	/	/	/	Y	/	/	/	/	/	Y	/	/	/	Y	/	/	Y	Y	/	Y	Y	/	Y	/	/	/
K00971	/	Y	/	/	Y	Y	/	/	Y	/	/	Y	Y	/	/	/	/	Y	/	Y	/	Y	/	/	Y	/	Y	Y	/	/	/	Y	Y	Y	/	/	Y	Y	/	/	Y	Y	Y	Y	Y	Y	/	/	/
K00972	/	/	/	/	/	/	/	/	/	/	/	/	/	/	/	/	/	/	/	/	/	/	/	/	/	/	Y	/	/	/	/	/	/	/	/	/	/	/	/	/	Y	/	Y	/	/	/	/	/	/
K00973	/	Y	Y	Y	/	Y	/	/	/	Y	Y	Y	/	Y	Y	Y	Y	Y	Y	/	/	Y	Y	/	/	Y	Y	Y	/	/	Y	/	Y	/	Y	/	Y	/	Y	Y	Y	Y	Y	Y	/	Y	/	Y	Y
K00974	Y	Y	/	Y	/	/	/	/	/	Y	/	/	Y	Y	Y	Y	Y	/	Y	Y	/	/	Y	/	/	Y	/	Y	Y	Y	/	Y	/	Y	/	Y	/	/	Y	Y	/	/	/	/	Y	/	Y	/	Y
K00975	Y	Y	Y	/	Y	Y	Y	Y	Y	Y	Y	Y	Y	Y	Y	Y	Y	Y	Y	Y	Y	/	Y	Y	/	Y	Y	Y	Y	Y	/	Y	Y	Y	/	Y	Y	Y	Y	Y	Y	/	Y	Y	Y	Y	Y	/	Y
K00976	/	/	/	/	/	/	/	/	/	/	/	/	/	/	/	/	/	/	/	/	/	/	/	/	/	/	/	/	/	/	/	/	/	/	/	/	/	/	/	/	/	/	/	/	/	/	/	/	/
K00977	/	/	/	/	/	/	/	/	/	/	/	/	/	/	/	/	/	/	/	/	/	/	/	/	/	/	/	/	/	/	/	/	/	/	/	/	/	/	/	/	/	/	/	/	/	/	/	/	/
K00978	Y	/	/	/	/	/	/	/	/	/	/	/	/	Y	/	/	Y	/	Y	/	/	Y	/	/	/	/	/	/	/	/	/	/	/	/	Y	/	/	/	/	/	Y	/	/	/	/	/	/	/	/
K00979	/	/	Y	/	/	Y	/	/	/	/	/	Y	Y	Y	/	/	Y	Y	Y	Y	/	/	Y	/	Y	/	Y	/	/	Y	/	/	Y	/	Y	/	/	/	/	Y	Y	Y	/	/	/	Y	Y	Y	/
K00980	/	/	/	/	/	/	/	Y	/	/	/	/	/	/	/	/	/	/	/	/	/	/	/	/	/	/	/	/	/	/	/	/	/	/	/	/	/	/	/	/	/	/	/	/	/	/	/	/	/
K00981	/	Y	Y	Y	Y	Y	Y	Y	/	Y	/	Y	Y	Y	Y	Y	Y	Y	Y	Y	/	Y	Y	Y	Y	Y	Y	Y	Y	Y	/	Y	Y	Y	Y	Y	Y	Y	Y	Y	Y	Y	Y	Y	Y	Y	Y	Y	Y
K00982	/	/	/	/	/	/	/	Y	/	/	/	/	Y	/	/	/	/	/	/	/	Y	/	Y	/	/	/	Y	/	/	/	/	/	/	/	/	/	/	/	/	/	Y	/	Y	/	/	/	/	/	/
K00983	/	/	/	/	/	/	Y	Y	/	/	/	/	/	Y	/	/	/	/	/	/	/	/	/	/	/	/	/	/	/	/	/	/	/	/	/	/	/	/	/	Y	/	/	/	/	/	/	/	/	/
K00984	/	/	/	/	/	/	/	/	/	/	/	/	/	/	/	/	/	/	/	/	/	/	/	/	/	/	/	/	/	/	/	/	/	/	/	/	/	/	/	/	/	/	/	/	/	/	/	/	/
K00986	/	/	/	Y	/	/	/	Y	/	Y	/	/	/	Y	/	/	/	/	Y	/	Y	/	/	/	/	/	/	/	/	/	/	/	/	/	/	/	/	/	/	Y	/	/	/	/	/	/	Y	/	Y
K00987	/	/	/	/	/	/	/	/	/	/	/	/	/	/	/	/	/	/	/	/	/	/	/	/	/	/	/	/	/	/	/	/	/	/	/	/	/	/	/	/	/	/	/	/	/	/	/	/	/
K00988	/	/	/	/	/	/	/	/	/	/	/	/	/	/	/	/	/	/	/	/	/	/	/	/	/	/	/	/	/	/	/	/	/	/	/	/	/	/	/	/	/	/	/	/	/	/	/	/	/
K00989	Y	Y	Y	Y	Y	/	Y	Y	Y	Y	Y	Y	/	Y	/	/	Y	Y	/	Y	Y	/	Y	/	/	Y	Y	/	Y	Y	/	/	/	Y	/	/	/	/	/	/	/	/	Y	/	Y	Y	Y	Y	/
K00990	/	/	/	/	/	/	/	/	/	/	/	Y	Y	/	/	/	/	/	/	/	/	/	Y	/	/	/	Y	/	/	/	/	/	/	/	/	/	/	/	/	Y	Y	/	Y	/	/	/	/	Y	/
K00991	/	/	/	/	Y	Y	Y	Y	/	/	Y	Y	/	Y	Y	Y	/	/	/	/	/	Y	Y	/	Y	/	Y	/	/	/	/	Y	Y	Y	/	/	Y	Y	Y	/	Y	Y	Y	Y	Y	Y	/	/	Y
K00992	/	/	/	/	/	/	/	/	/	/	/	/	/	/	/	/	/	/	/	/	/	/	/	/	/	/	/	/	/	/	/	/	Y	/	/	/	/	/	/	/	/	/	/	/	/	/	/	/	/
K00993	/	/	/	/	/	/	/	/	/	/	/	/	/	/	/	/	/	/	/	/	/	/	/	/	/	/	/	/	/	/	/	/	/	/	/	/	/	/	/	/	/	/	/	/	/	/	/	/	/
K00994	/	/	/	/	/	/	/	/	/	/	/	/	/	/	/	/	/	/	/	/	/	/	/	/	/	/	/	/	/	/	/	/	/	/	/	/	/	/	/	/	/	/	/	/	/	/	/	/	/
K00995	Y	Y	/	/	Y	Y	Y	Y	/	Y	/	/	Y	/	Y	Y	/	Y	/	Y	Y	/	Y	/	Y	Y	Y	/	Y	Y	/	Y	/	Y	/	Y	/	Y	Y	Y	Y	Y	Y	/	/	/	Y	/	Y
K00996	/	Y	/	/	/	Y	/	/	/	/	/	/	/	Y	/	/	/	Y	Y	/	/	Y	/	Y	/	/	/	/	/	/	/	/	Y	/	/	/	/	/	/	/	Y	/	/	/	/	/	/	/	/
K00997	Y	Y	Y	Y	Y	Y	Y	Y	Y	Y	Y	Y	Y	Y	Y	Y	/	Y	Y	Y	Y	/	Y	Y	Y	Y	Y	Y	Y	/	/	Y	/	Y	Y	Y	/	/	Y	/	Y	Y	Y	/	Y	Y	Y	Y	Y
K00998	/	/	/	/	/	/	/	/	/	/	/	/	/	/	/	/	/	/	/	/	/	/	/	/	/	/	/	/	/	/	/	/	/	/	/	/	/	/	/	/	/	/	/	/	/	/	/	/	/
K00999	/	/	/	/	/	/	/	/	/	/	/	/	/	/	/	/	/	/	/	/	/	/	/	/	/	/	/	/	/	/	/	/	/	/	/	/	/	/	/	/	/	/	/	/	/	/	/	/	/
K01000	Y	Y	Y	Y	/	Y	Y	Y	Y	Y	Y	Y	Y	Y	/	Y	Y	Y	/	Y	Y	Y	Y	/	Y	Y	Y	Y	Y	/	/	Y	Y	Y	Y	Y	Y	Y	/	Y	Y	Y	Y	Y	Y	Y	Y	Y	Y
K01001	/	/	/	/	/	/	/	/	/	/	/	/	/	/	/	/	/	/	/	/	/	/	/	/	/	/	/	/	/	/	/	/	/	/	/	/	/	/	/	/	/	/	/	/	/	/	/	/	/
K01002	/	/	/	/	/	/	/	/	/	/	/	/	/	/	/	/	/	/	/	/	/	/	/	/	/	/	/	/	/	/	/	/	/	/	/	/	/	/	/	/	/	/	/	/	/	/	/	/	/
K01003	/	/	/	/	/	/	/	/	/	/	/	/	/	/	/	/	/	/	/	/	/	/	/	/	/	/	/	/	/	/	/	/	/	/	/	/	/	/	/	/	/	/	/	/	/	/	/	/	/
K01004	/	/	/	/	/	/	/	/	/	/	/	/	/	/	/	/	/	/	/	/	/	/	/	/	/	/	/	/	/	/	/	/	/	/	/	/	/	/	/	/	/	/	/	/	/	/	/	/	/
K01006	Y	Y	Y	Y	/	Y	Y	/	/	/	/	Y	Y	Y	/	/	Y	Y	/	Y	Y	Y	Y	/	Y	Y	Y	Y	Y	Y	/	Y	/	Y	/	/	Y	Y	Y	/	Y	Y	Y	Y	/	/	Y	/	Y
K01007	/	/	/	/	/	Y	/	Y	/	/	/	/	Y	/	Y	/	/	/	Y	/	/	/	Y	/	/	/	Y	Y	/	/	Y	Y	/	/	/	/	/	/	/	Y	/	/	/	/	/	/	/	/	/
K01008	Y	Y	Y	/	Y	/	Y	/	/	Y	Y	Y	Y	Y	Y	/	/	Y	/	Y	/	/	Y	Y	/	Y	/	Y	Y	Y	/	Y	Y	/	Y	/	/	/	/	Y	/	/	/	Y	/	/	Y	/	/
K01011	/	/	/	/	/	/	/	/	/	/	/	/	Y	/	/	/	/	/	/	Y	Y	/	/	/	/	/	/	/	/	/	Y	/	/	/	/	/	/	/	/	/	/	/	/	/	/	/	/	/	/
K01012	Y	Y	Y	/	/	/	/	/	/	Y	/	Y	Y	Y	/	/	Y	Y	Y	/	Y	Y	Y	/	Y	/	Y	Y	/	/	Y	Y	/	/	/	/	Y	Y	/	Y	Y	Y	/	Y	Y	/	Y	Y	/
K01014	/	/	/	/	/	/	/	/	/	/	/	/	/	/	/	/	/	/	/	/	/	/	/	/	/	/	/	/	/	/	/	/	/	/	/	/	/	/	/	/	/	/	/	/	/	/	/	/	/
K01015	/	/	/	/	/	/	/	/	/	/	/	/	/	/	/	/	/	/	/	/	/	/	/	/	/	/	/	/	/	/	/	/	/	/	/	/	/	/	/	/	/	/	/	/	/	/	/	/	/
K01016	/	/	/	/	/	/	/	/	/	/	/	/	/	/	/	/	/	/	/	/	/	/	/	/	/	/	/	/	/	/	/	/	/	/	/	/	/	/	/	/	/	/	/	/	/	/	/	/	/
K01017	/	/	/	/	/	/	/	/	/	/	/	/	/	/	/	/	/	/	/	/	/	/	/	/	/	/	/	/	/	/	/	/	/	/	/	/	/	/	/	/	/	/	/	/	/	/	/	/	/
K01019	/	/	/	/	/	/	/	/	/	/	/	/	/	/	/	/	/	/	/	/	/	/	/	/	/	/	/	/	/	/	/	/	/	/	/	/	/	/	/	/	/	/	/	/	/	/	/	/	/
K01020	/	/	/	/	/	/	/	/	/	/	/	/	/	/	/	/	/	/	/	/	/	/	/	/	/	/	/	/	/	/	/	/	/	/	/	/	/	/	/	/	/	/	/	/	/	/	/	/	/
K01021	/	/	/	/	/	/	/	/	/	/	/	/	/	/	/	/	/	/	/	/	/	/	/	/	/	/	/	/	/	/	/	/	/	/	/	/	/	/	/	/	/	/	/	/	/	/	/	/	/
K01022	/	/	/	/	/	/	/	/	/	/	/	/	/	/	/	/	/	/	/	/	/	/	/	/	/	/	/	/	/	/	/	/	/	/	/	/	/	/	/	/	/	/	/	/	/	/	/	/	/
K01023	/	/	/	/	/	/	/	/	/	/	/	/	/	/	/	/	/	/	/	/	/	/	/	/	/	/	/	/	/	/	/	/	/	/	/	/	/	/	/	/	/	/	/	/	/	/	/	/	/
K01024	/	/	/	/	/	/	/	/	/	/	/	/	/	/	/	/	/	/	/	/	/	/	/	/	/	/	/	/	/	/	/	/	/	/	/	/	/	/	/	/	/	/	/	/	/	/	/	/	/
K01025	/	/	/	/	/	/	/	/	/	/	/	/	/	/	/	/	/	/	/	/	/	/	/	/	/	/	/	/	/	/	/	/	/	/	/	/	/	/	/	/	/	/	/	/	/	/	/	/	/
K01026	/	/	/	/	Y	/	/	/	/	/	/	/	/	/	/	/	/	/	Y	/	Y	/	Y	/	/	/	/	/	/	/	/	/	/	/	/	/	/	/	/	/	/	/	/	/	/	/	/	/	/
K01027	/	/	/	/	/	/	/	/	/	/	/	/	Y	/	/	/	/	/	/	/	/	/	/	/	/	/	/	/	/	/	/	/	/	/	/	/	/	/	/	/	/	/	/	/	/	/	/	/	/
K01028	/	/	/	/	/	/	/	/	/	/	/	/	Y	/	/	/	/	/	/	/	/	/	/	/	/	/	/	/	/	/	/	/	/	/	/	/	/	/	/	/	/	/	/	/	/	/	Y	/	/
K01029	/	/	/	/	/	/	/	/	/	/	/	/	/	/	/	/	/	/	/	Y	/	/	/	/	/	/	/	/	/	Y	/	/	/	/	/	/	/	/	/	/	/	/	/	/	/	/	/	/	/
K01031	/	/	/	/	/	/	/	/	/	/	/	/	/	/	/	/	/	/	/	/	/	/	/	/	/	/	/	/	/	/	/	/	/	/	/	/	/	/	/	/	/	/	/	/	/	/	/	/	/
K01032	/	/	/	/	/	/	/	/	/	/	/	/	/	/	/	/	/	/	/	/	/	/	/	/	/	/	/	/	/	/	/	/	/	/	/	/	/	/	/	/	/	/	/	/	/	/	/	/	/
K01034	Y	/	/	/	/	/	Y	/	/	/	/	/	Y	/	/	/	/	/	/	Y	/	/	Y	/	Y	Y	/	/	Y	Y	/	/	/	/	/	Y	/	Y	Y	/	/	Y	/	Y	/	/	Y	/	/
K01035	Y	/	/	/	/	/	Y	/	/	/	/	/	Y	/	/	/	/	/	/	/	/	/	Y	/	Y	Y	/	/	Y	/	/	/	/	/	/	Y	/	Y	Y	/	/	Y	/	Y	/	/	Y	/	/
K01039	/	/	/	/	Y	/	/	/	/	/	/	/	Y	/	Y	/	/	/	/	/	/	/	/	/	/	/	/	Y	/	/	/	/	/	/	/	/	/	/	/	/	/	/	/	/	/	/	/	/	/
K01040	/	/	/	/	Y	/	/	/	/	/	/	/	/	/	Y	/	/	/	/	/	/	/	/	/	/	/	/	Y	/	/	/	/	/	/	/	/	/	/	/	/	/	/	/	/	/	/	/	/	/
K01042	Y	Y	Y	/	Y	/	/	/	/	Y	Y	Y	Y	Y	/	/	/	Y	/	Y	/	/	Y	Y	/	Y	Y	Y	Y	Y	/	Y	/	/	Y	/	/	/	/	Y	/	/	/	/	/	/	Y	/	/
K01044	/	/	/	/	/	/	/	/	/	/	/	/	/	/	/	/	/	/	/	/	/	/	/	/	/	/	/	/	/	/	/	/	/	/	/	/	/	/	/	/	/	/	/	/	/	/	/	/	/
K01045	/	/	/	/	/	/	/	/	/	/	/	/	/	/	/	/	/	/	/	/	/	/	/	/	/	/	/	/	/	/	/	/	/	/	/	/	/	/	/	/	/	/	/	/	/	/	/	/	/
K01046	/	/	/	/	Y	/	/	/	/	/	/	/	/	/	/	/	/	/	/	/	/	/	/	Y	/	/	/	/	/	/	/	/	/	/	/	/	/	/	/	/	/	/	/	/	/	/	/	/	/
K01047	/	/	/	/	/	/	/	/	/	/	/	/	/	/	/	/	/	/	/	/	/	/	/	/	/	/	/	/	/	/	/	/	/	/	/	/	/	/	/	/	/	/	/	/	/	/	/	/	/
K01048	Y	/	/	/	/	/	/	/	/	/	/	/	/	/	/	Y	/	/	/	/	/	/	/	Y	/	Y	/	/	Y	/	/	/	Y	/	/	Y	/	/	Y	/	/	/	/	/	/	/	/	/	Y
K01049	/	/	/	/	/	/	/	/	/	/	/	/	/	/	/	/	/	/	/	/	/	/	/	/	/	/	/	/	/	/	/	/	/	/	/	/	/	/	/	/	/	/	/	/	/	/	/	/	/
K01050	/	/	/	/	/	/	/	/	/	/	/	/	/	/	/	/	/	/	/	/	/	/	/	/	/	/	/	/	/	/	/	/	/	/	/	/	/	/	/	/	/	/	/	/	/	/	/	/	/
K01051	/	/	/	/	/	/	/	/	/	/	/	/	/	/	/	/	/	/	/	/	/	/	/	/	/	/	/	/	/	/	/	/	Y	/	/	/	/	/	/	/	/	/	/	/	/	/	/	/	/
K01052	/	/	/	/	/	/	/	/	/	/	/	/	/	/	/	/	/	/	/	/	/	/	/	/	/	/	/	/	/	/	/	/	/	/	/	/	/	/	/	/	/	/	/	/	/	/	/	/	/
K01053	/	Y	/	/	/	/	/	/	/	/	/	Y	/	/	/	/	/	/	/	/	/	Y	/	Y	/	/	Y	/	/	/	/	/	Y	/	Y	/	/	/	/	/	Y	/	/	/	/	/	/	Y	/
K01054	/	/	/	/	/	/	/	/	/	/	/	/	/	/	/	/	/	/	/	/	/	/	/	/	/	/	Y	/	/	/	/	/	/	/	/	/	/	/	/	/	Y	/	/	/	/	/	/	/	/
K01055	/	/	/	/	/	/	/	/	/	/	/	/	/	/	/	/	/	/	/	/	/	/	Y	Y	/	Y	/	/	Y	/	/	/	/	/	/	Y	/	/	/	/	/	/	/	/	/	/	/	/	/
K01056	Y	Y	Y	Y	/	Y	Y	Y	/	Y	Y	Y	Y	Y	Y	Y	Y	Y	Y	Y	Y	Y	Y	Y	Y	Y	Y	Y	Y	/	/	Y	Y	Y	Y	Y	Y	Y	Y	Y	Y	Y	Y	Y	Y	/	Y	Y	Y
K01057	/	/	/	/	/	/	/	Y	/	/	/	Y	/	Y	/	/	Y	/	Y	/	Y	Y	Y	/	/	/	/	/	/	/	/	/	Y	/	/	/	Y	/	/	Y	Y	/	Y	/	/	/	/	/	/
K01058	/	/	/	/	/	/	/	/	Y	/	/	/	/	/	/	/	/	/	/	/	/	/	/	/	/	/	/	/	/	/	/	/	/	/	/	/	/	/	/	/	/	/	/	/	/	/	/	/	/
K01059	/	/	/	/	/	/	/	/	/	/	/	/	/	/	/	/	/	/	/	/	/	/	/	/	/	/	/	/	/	/	/	/	/	/	/	/	/	/	/	/	/	/	/	/	/	/	/	/	/
K01060	/	Y	/	/	/	/	/	Y	/	Y	/	/	/	Y	/	Y	/	/	Y	/	Y	/	/	Y	/	/	/	/	/	/	/	/	/	Y	/	/	/	/	/	/	/	/	Y	/	/	/	/	/	/
K01061	/	/	/	/	/	/	/	/	Y	/	/	Y	Y	/	/	/	/	/	/	/	/	/	/	Y	/	/	/	/	/	/	/	/	Y	/	/	/	/	/	/	/	Y	/	/	/	/	/	/	/	Y
K01062	/	/	/	/	/	/	/	/	/	/	/	/	/	/	/	/	/	/	/	/	/	/	/	/	/	/	/	/	/	/	/	/	/	/	/	/	/	/	/	/	/	/	/	/	/	/	/	/	/
K01063	/	/	/	/	/	/	/	/	/	/	/	/	/	/	/	/	/	/	/	/	/	/	/	/	/	/	/	/	/	/	/	/	/	/	/	/	/	/	/	/	/	/	/	/	/	/	/	/	/
K01064	/	/	/	/	/	/	/	/	/	/	/	/	/	/	/	/	/	/	/	/	/	/	/	/	/	/	/	/	/	/	/	/	/	/	/	/	/	/	/	/	/	/	/	/	/	/	/	/	/
K01065	/	/	/	/	/	/	/	/	/	/	/	/	/	/	/	/	/	/	/	/	/	/	/	/	/	/	/	/	/	/	/	/	/	/	/	/	/	/	/	/	/	/	/	/	/	/	/	/	/
K01066	/	/	/	/	/	/	/	/	/	/	/	/	/	/	Y	/	/	/	/	/	Y	/	/	/	/	/	/	/	/	/	/	/	/	/	/	/	/	/	/	/	/	/	Y	/	/	/	/	/	/
K01067	/	/	/	/	/	/	/	/	/	/	/	/	/	/	/	/	/	/	/	/	/	Y	/	Y	/	/	/	/	/	/	/	/	/	/	Y	/	/	/	/	/	/	/	/	Y	/	/	/	/	/
K01068	/	/	/	/	/	/	/	/	/	/	/	/	/	/	/	/	/	/	/	/	/	/	/	/	/	/	/	/	/	/	/	/	/	/	/	/	/	/	/	/	/	/	/	/	/	/	/	/	/
K01069	Y	Y	Y	/	Y	Y	Y	Y	/	/	Y	Y	Y	Y	Y	/	Y	Y	Y	Y	Y	Y	Y	Y	Y	Y	Y	Y	Y	Y	Y	Y	Y	Y	Y	Y	Y	Y	Y	Y	Y	/	Y	Y	Y	Y	Y	Y	/
K01070	/	/	/	/	/	/	/	/	/	/	/	/	/	/	/	/	/	/	/	/	/	/	/	/	/	/	/	/	/	/	/	/	/	/	/	/	Y	/	/	/	/	/	/	/	/	/	/	/	/
K01071	/	/	/	/	/	/	/	/	Y	/	/	/	/	/	/	/	/	/	/	/	/	/	/	/	/	/	Y	/	/	/	/	/	Y	/	/	/	/	/	/	Y	/	/	/	Y	/	/	/	/	/
K01073	/	/	/	/	Y	/	/	/	/	/	/	/	/	/	/	/	/	/	/	/	/	/	/	/	/	/	/	/	/	/	/	/	/	/	/	/	/	/	/	/	/	/	/	/	/	/	/	/	Y
K01074	/	/	/	/	/	/	/	/	/	/	/	/	/	/	/	/	/	/	/	/	/	/	/	/	/	/	/	/	/	/	/	/	/	/	/	/	/	/	/	/	/	/	/	/	/	/	/	/	/
K01075	/	/	/	/	/	/	/	/	/	/	/	/	/	/	/	/	/	/	/	/	/	/	/	/	/	/	/	/	/	/	/	/	/	/	/	/	/	/	/	/	/	/	/	/	/	/	/	/	/
K01077	/	Y	Y	Y	/	/	/	/	/	Y	/	Y	Y	Y	/	/	Y	/	Y	Y	/	Y	Y	/	/	Y	Y	/	Y	/	Y	Y	Y	/	Y	/	Y	/	/	Y	Y	/	Y	/	Y	/	Y	Y	/
K01078	/	/	/	/	/	/	/	/	/	/	/	/	/	/	/	/	/	/	/	/	/	/	/	/	/	/	/	/	/	/	/	/	/	/	/	/	/	/	/	/	/	/	/	/	/	/	/	/	/
K01079	/	/	/	/	/	/	/	/	/	/	/	/	/	/	/	/	/	/	/	/	/	/	/	/	/	/	/	/	/	/	Y	/	/	/	/	/	Y	/	/	Y	/	/	/	/	/	/	/	/	/
K01080	/	/	/	/	/	/	/	/	/	/	/	/	/	/	/	/	/	/	/	/	/	/	/	/	/	/	/	/	/	/	/	/	/	/	/	/	/	/	/	/	/	/	/	/	/	/	/	/	/
K01081	Y	/	/	/	/	/	/	/	/	/	/	/	/	/	/	/	/	/	/	/	/	Y	/	/	/	/	/	/	/	/	Y	/	/	/	/	/	Y	/	/	/	/	/	/	Y	/	/	/	/	/
K01082	/	/	/	/	/	/	/	/	/	/	/	/	Y	/	/	/	/	/	/	/	/	/	/	/	/	/	Y	/	/	/	/	/	/	Y	Y	/	/	/	/	Y	Y	/	/	/	/	/	/	/	/
K01083	/	/	/	/	/	/	/	/	/	/	/	/	/	/	/	/	/	/	/	/	/	/	/	/	/	/	/	/	/	/	/	/	/	/	Y	/	/	/	/	/	/	/	/	/	/	/	/	/	/
K01084	/	/	/	/	/	/	/	/	/	/	/	/	/	/	/	/	/	/	/	/	/	/	/	/	/	/	/	/	/	/	/	/	/	/	/	/	/	/	/	/	/	/	/	/	/	/	/	/	/
K01085	/	/	/	/	/	/	/	/	/	/	/	/	/	/	/	/	/	/	/	/	/	/	/	/	/	/	/	/	/	/	/	/	/	/	/	/	/	/	/	/	/	/	/	/	/	/	/	/	/
K01086	/	/	/	/	/	/	/	/	/	/	/	/	/	/	/	/	/	/	/	/	/	/	/	/	/	/	/	/	/	/	/	/	/	/	/	/	/	/	/	/	/	/	/	/	/	/	/	/	/
K01087	/	/	/	/	/	/	/	/	/	/	/	/	/	/	/	/	/	/	/	/	/	/	Y	/	/	/	Y	/	/	Y	/	/	/	/	/	/	/	/	/	Y	/	/	Y	/	/	/	/	/	/
K01089	/	/	/	/	/	/	/	/	/	/	/	/	/	/	/	/	/	/	/	/	/	Y	/	/	/	/	/	/	/	/	/	/	Y	/	/	/	Y	/	/	/	/	/	/	/	/	/	/	/	/
K01090	/	Y	Y	/	/	Y	/	/	/	Y	/	Y	/	Y	/	/	Y	Y	Y	/	/	/	Y	Y	/	/	Y	/	/	/	/	Y	/	/	Y	Y	/	/	Y	/	Y	/	/	/	Y	Y	/	Y	/
K01091	/	Y	Y	Y	/	/	Y	/	Y	Y	/	Y	Y	Y	Y	Y	Y	Y	Y	Y	/	Y	Y	Y	Y	/	Y	/	/	/	/	/	/	Y	/	Y	Y	Y	Y	Y	Y	Y	Y	/	Y	Y	Y	/	Y
K01092	/	/	Y	Y	/	Y	/	Y	/	/	Y	Y	Y	/	/	Y	Y	Y	Y	/	Y	Y	Y	Y	/	/	Y	/	Y	/	Y	/	Y	/	/	Y	Y	/	/	Y	Y	/	Y	/	Y	Y	/	/	/
K01093	/	/	/	/	/	/	/	/	/	/	/	/	/	/	/	/	/	/	/	/	/	/	/	/	/	/	/	/	/	/	/	/	/	/	/	/	/	/	/	/	/	/	/	/	/	/	/	/	/
K01094	/	/	/	/	/	/	/	/	/	/	/	/	/	/	/	/	/	/	/	/	/	/	/	/	/	/	/	/	/	/	/	/	/	/	/	/	/	/	/	/	/	/	/	/	/	/	/	/	/
K01095	Y	/	/	/	/	Y	Y	/	Y	/	/	/	Y	/	/	/	/	Y	/	Y	/	/	Y	/	Y	/	/	/	/	Y	/	/	/	/	/	/	/	Y	Y	Y	/	Y	/	/	/	/	Y	/	/
K01096	/	/	/	/	/	/	/	/	/	/	/	/	/	/	/	/	/	/	/	/	/	/	/	/	/	/	/	/	/	/	/	/	/	/	/	/	/	/	/	/	/	/	/	/	/	/	/	/	/
K01097	/	/	/	/	/	/	/	/	/	/	/	/	/	/	/	/	/	/	/	/	/	/	/	/	/	/	/	/	/	/	/	/	/	/	/	/	/	/	/	/	/	/	/	/	/	/	/	/	/
K01098	/	/	/	/	/	/	/	/	/	/	/	/	/	/	/	/	/	/	/	/	/	/	/	/	/	/	/	/	/	/	/	/	/	/	/	/	/	/	/	/	/	/	/	/	/	/	/	/	/
K01099	/	/	/	/	/	/	/	/	/	/	/	/	/	/	/	/	/	/	/	/	/	/	/	/	/	/	/	/	/	/	/	/	/	/	/	/	/	/	/	/	/	/	/	/	/	/	/	/	/
K01100	/	/	/	/	/	/	/	/	/	/	/	/	/	/	/	/	/	/	/	/	/	/	/	/	/	/	/	/	/	/	/	/	/	/	/	/	/	/	/	/	/	/	/	/	/	/	/	/	/
K01101	Y	Y	Y	/	/	/	/	/	/	Y	/	Y	/	/	/	Y	/	/	/	/	/	/	/	Y	/	Y	/	/	/	Y	/	/	/	/	Y	/	/	/	Y	/	/	/	/	/	Y	/	/	Y	/
K01102	/	/	/	/	/	/	/	/	/	/	/	/	/	/	/	/	/	/	/	/	/	/	/	/	/	/	/	/	/	/	/	/	/	/	/	/	/	/	/	/	/	/	/	/	/	/	/	/	/
K01103	/	/	/	/	/	/	/	/	/	/	/	/	/	/	/	/	/	/	/	/	/	/	/	/	/	/	/	/	/	/	/	/	/	/	/	/	/	/	/	Y	/	/	/	/	/	/	/	/	/
K01104	/	/	/	/	Y	/	Y	Y	/	Y	Y	/	/	Y	Y	Y	Y	Y	Y	Y	Y	Y	/	/	Y	Y	Y	Y	Y	/	/	Y	Y	Y	/	Y	Y	Y	Y	/	/	Y	Y	Y	/	Y	/	/	Y
K01106	/	/	/	/	/	/	/	/	/	/	/	/	/	/	/	/	/	/	/	/	/	/	/	/	/	/	/	/	/	/	/	/	/	/	/	/	/	/	/	/	/	/	/	/	/	/	/	/	/
K01107	/	/	/	/	/	/	/	/	/	/	/	/	/	/	/	/	/	/	/	/	/	/	/	/	/	/	/	/	/	/	/	/	/	/	/	/	/	/	/	/	/	/	/	/	/	/	/	/	/
K01108	/	/	/	/	/	/	/	/	/	/	/	/	/	/	/	/	/	/	/	/	/	/	/	/	/	/	/	/	/	/	/	/	/	/	/	/	/	/	/	/	/	/	/	/	/	/	/	/	/
K01109	/	/	/	/	/	/	/	/	/	/	/	/	/	/	/	/	/	/	/	/	/	/	/	/	/	/	/	/	/	/	/	/	/	/	/	/	/	/	/	/	/	/	/	/	/	/	/	/	/
K01110	/	/	/	/	/	/	/	/	/	/	/	/	/	/	/	/	/	/	/	/	/	/	/	/	/	/	/	/	/	/	/	/	/	/	/	/	/	/	/	/	/	/	/	/	/	/	/	/	/
K01111	/	/	/	/	/	/	/	/	/	/	/	/	/	/	/	/	/	/	/	/	/	/	/	/	/	/	/	/	/	/	/	/	/	/	/	/	/	/	/	/	/	/	/	/	/	/	/	/	/
K01112	/	/	/	/	/	/	/	/	/	/	/	/	/	/	/	/	/	/	/	/	/	/	/	/	/	/	/	/	/	/	/	/	/	/	/	/	/	/	/	/	/	/	/	/	/	/	/	/	/
K01113	/	/	/	/	/	/	/	/	/	/	/	/	/	/	/	/	/	/	/	/	/	Y	/	/	/	/	/	/	/	/	/	/	/	/	/	/	/	/	/	/	Y	/	/	/	/	/	/	/	/
K01114	/	/	/	/	/	/	Y	/	/	/	/	/	/	/	/	/	/	/	/	/	/	/	/	/	/	/	/	/	/	/	/	Y	/	/	/	/	/	/	/	/	/	/	/	/	/	/	/	/	/
K01115	/	/	/	/	/	/	/	/	/	/	/	/	/	/	/	/	/	/	/	/	/	/	/	/	/	/	/	/	/	/	/	/	/	/	/	/	/	/	/	/	/	/	/	/	/	/	/	/	/
K01116	/	/	/	/	/	/	/	/	/	/	/	/	/	/	/	/	/	/	/	/	/	/	/	/	/	/	/	/	/	/	/	/	/	/	/	/	/	/	/	/	/	/	/	/	/	/	/	/	/
K01117	/	/	/	/	/	/	/	/	/	/	/	/	/	/	/	/	/	/	/	/	/	/	/	/	/	/	/	/	/	/	/	/	/	/	/	/	/	/	/	/	/	/	/	/	/	/	/	/	/
K01118	/	/	/	/	/	/	/	/	/	/	/	/	/	/	Y	/	/	/	Y	/	/	/	Y	/	/	/	Y	/	/	/	/	/	/	/	Y	/	/	/	/	/	/	/	/	/	/	/	/	/	/
K01119	/	/	/	/	/	/	/	/	/	/	Y	/	/	/	/	/	/	/	/	/	/	/	/	/	/	/	/	/	/	/	/	/	Y	/	/	/	/	/	/	/	/	/	/	Y	/	/	/	Y	/
K01120	/	/	/	/	/	Y	/	/	/	/	/	/	/	/	/	/	/	/	/	/	/	/	Y	/	/	/	/	/	/	/	/	/	/	/	/	/	/	/	/	Y	/	/	/	/	/	/	/	/	/
K01121	/	/	/	/	/	/	/	/	/	/	/	/	/	/	/	/	/	/	/	/	/	/	/	/	/	/	/	/	/	/	/	/	/	/	/	/	/	/	/	/	/	/	/	/	/	/	/	/	/
K01122	/	/	/	/	/	/	/	/	/	/	/	/	/	/	/	/	/	/	/	/	/	/	/	/	/	/	/	/	/	/	/	/	/	/	/	/	/	/	/	/	/	/	/	/	/	/	/	/	/
K01123	/	/	/	/	/	/	/	/	/	/	/	/	/	/	/	/	/	/	/	/	/	/	/	/	/	/	/	/	/	/	/	/	/	/	/	/	/	/	/	/	/	/	/	/	/	/	/	/	/
K01124	/	/	/	/	/	/	/	/	/	/	/	/	/	/	/	/	/	/	/	/	/	/	/	/	/	/	/	/	/	/	/	/	/	/	/	/	/	/	/	/	/	/	/	/	/	/	/	/	/
K01125	/	/	/	/	/	/	/	/	/	/	/	/	/	/	/	/	/	/	/	/	/	/	/	/	/	/	/	/	/	/	/	/	/	/	/	/	/	/	/	/	/	/	/	/	/	/	/	/	/
K01126	Y	Y	Y	Y	/	/	/	Y	/	Y	/	Y	/	Y	/	Y	Y	/	Y	/	Y	Y	/	Y	/	Y	Y	/	Y	Y	Y	Y	Y	Y	/	Y	Y	/	Y	Y	Y	/	Y	/	/	/	/	/	/
K01127	/	/	/	/	/	/	/	/	/	/	/	/	/	/	/	/	/	/	/	/	/	/	/	/	/	/	/	/	/	/	/	/	/	/	/	/	/	/	/	/	/	/	/	/	/	/	/	/	/
K01128	/	/	/	/	/	/	/	/	/	/	/	/	/	/	/	/	/	/	/	/	/	/	/	/	/	/	/	/	/	/	/	/	/	/	/	/	/	/	/	/	/	/	/	/	/	/	/	/	/
K01129	/	/	Y	/	Y	Y	Y	Y	Y	/	/	Y	/	Y	Y	/	Y	/	Y	Y	Y	Y	Y	Y	Y	/	Y	Y	/	/	/	Y	/	Y	Y	Y	Y	Y	/	/	Y	Y	Y	/	Y	Y	Y	/	Y
K01130	/	/	Y	/	/	/	/	/	/	Y	/	Y	/	Y	/	/	/	/	Y	/	/	Y	/	Y	/	/	Y	/	/	/	/	/	Y	/	Y	/	Y	/	/	/	Y	/	Y	/	Y	/	/	Y	Y
K01131	/	/	/	/	/	/	/	/	/	/	/	/	/	/	/	/	/	/	/	/	/	/	/	/	/	/	/	/	/	/	/	/	/	/	/	/	/	/	/	/	/	/	/	/	/	/	/	/	/
K01132	/	/	/	/	/	/	/	/	/	Y	/	/	/	/	/	/	/	/	/	/	/	/	/	/	/	/	Y	/	/	/	/	/	/	/	/	/	/	/	/	/	/	/	/	/	/	/	/	Y	/
K01133	/	Y	Y	/	/	/	/	/	/	Y	/	/	/	Y	/	Y	Y	/	Y	/	/	/	/	Y	/	/	Y	/	/	/	/	/	/	/	Y	/	/	/	Y	/	Y	/	/	/	/	/	/	/	/
K01134	/	/	/	/	/	/	/	/	/	Y	/	/	/	Y	/	/	/	/	/	/	/	Y	/	Y	/	/	Y	/	/	/	/	/	Y	/	/	/	Y	/	/	/	Y	/	/	/	/	/	/	/	/
K01135	/	/	/	/	/	/	/	/	/	Y	/	/	/	Y	/	/	Y	/	/	/	/	Y	/	/	/	/	/	/	/	/	/	/	/	/	/	/	/	/	/	/	/	/	/	/	/	/	/	Y	/
K01136	/	/	/	/	/	/	/	/	/	/	/	/	/	/	/	/	/	/	/	/	/	/	/	/	/	/	/	/	/	/	/	/	/	/	/	/	/	/	/	/	/	/	/	/	/	/	/	/	/
K01137	/	/	Y	/	/	/	/	/	/	Y	/	/	/	/	/	/	/	/	/	/	/	/	/	/	/	/	Y	/	/	/	/	/	/	/	/	/	/	/	/	/	Y	/	/	/	/	/	/	/	/
K01138	/	Y	Y	/	/	/	/	/	/	Y	/	Y	/	Y	/	Y	Y	/	Y	/	/	Y	/	Y	/	/	Y	/	/	/	Y	/	Y	/	Y	/	Y	/	/	/	Y	/	/	/	/	Y	Y	Y	/
K01139	/	/	/	/	/	/	/	/	/	/	/	/	/	/	/	/	/	/	/	/	/	/	/	/	/	/	/	/	/	/	/	/	Y	/	/	/	/	/	/	/	/	/	/	/	/	/	/	/	/
K01141	/	/	/	/	/	/	/	/	/	/	/	/	/	/	/	/	/	/	/	/	/	/	/	/	/	/	/	/	/	/	/	/	/	/	/	/	/	/	/	/	/	/	/	/	/	/	/	/	/
K01142	Y	Y	/	Y	Y	Y	/	Y	/	/	Y	Y	/	/	/	/	/	Y	/	Y	Y	/	/	Y	Y	Y	Y	/	Y	/	/	/	Y	Y	Y	Y	/	Y	Y	Y	Y	Y	Y	/	Y	/	Y	/	/
K01143	/	/	/	/	/	/	/	/	/	/	/	/	/	/	/	/	/	/	/	/	/	/	/	/	/	/	/	/	/	/	/	/	/	/	/	/	/	/	/	/	/	/	/	/	/	/	/	/	/
K01144	/	/	/	/	/	/	/	/	/	/	/	/	/	/	/	/	/	/	/	/	/	/	/	/	/	/	/	/	/	/	/	/	Y	/	/	/	Y	/	/	/	/	/	/	Y	/	/	/	/	/
K01146	/	/	/	/	/	/	/	/	/	/	/	/	/	/	/	/	/	/	/	/	/	/	/	/	/	/	/	/	/	/	/	/	/	/	/	/	/	/	/	/	/	/	/	/	/	/	/	/	/
K01147	/	Y	/	/	/	/	/	/	/	/	/	/	Y	/	/	/	/	/	/	/	/	/	/	Y	/	/	/	/	/	/	/	/	/	/	/	/	/	Y	/	/	/	Y	/	/	/	/	/	Y	/
K01148	/	/	/	/	/	/	/	/	/	/	/	/	/	/	/	/	/	/	/	/	/	/	/	/	/	/	/	/	/	/	/	/	/	/	/	/	/	/	/	/	/	/	/	/	/	/	/	/	/
K01150	/	/	/	/	/	/	/	/	/	/	/	/	/	/	/	/	/	/	/	/	/	/	/	/	/	/	/	/	/	/	/	/	/	/	/	/	/	/	/	/	/	/	/	/	/	/	/	/	/
K01151	Y	Y	Y	/	/	/	Y	Y	/	Y	Y	Y	/	Y	/	Y	Y	/	Y	Y	Y	Y	Y	Y	/	Y	Y	Y	/	Y	Y	Y	/	Y	Y	Y	Y	/	Y	Y	/	/	/	Y	/	Y	Y	Y	Y
K01152	/	/	/	/	/	/	/	/	/	/	/	/	/	/	/	/	/	/	/	/	/	/	/	/	/	/	/	/	/	/	/	/	/	/	/	/	/	/	/	/	/	/	/	/	/	/	/	/	/
K01153	/	/	/	/	/	/	/	/	/	/	Y	/	/	/	/	/	/	/	/	/	/	Y	Y	/	Y	Y	Y	/	/	Y	Y	/	Y	/	/	/	Y	Y	Y	/	Y	Y	Y	/	/	/	/	/	/
K01154	/	/	/	/	/	/	/	Y	/	/	/	/	/	/	Y	/	/	/	/	/	/	Y	Y	/	Y	Y	/	/	/	/	Y	/	Y	/	/	/	Y	/	Y	/	Y	Y	Y	/	/	/	/	/	/
K01155	/	/	/	Y	/	/	/	/	/	/	/	/	/	/	/	/	/	/	/	/	/	/	/	Y	/	/	Y	/	Y	/	/	/	/	/	/	/	/	/	/	/	/	Y	/	/	Y	/	/	/	/
K01156	Y	/	Y	/	/	/	/	/	Y	/	/	/	/	/	Y	/	/	/	/	/	/	Y	/	/	/	/	/	Y	/	/	Y	/	/	/	Y	/	/	/	Y	/	/	Y	/	/	Y	/	/	Y	/
K01158	/	/	/	/	/	/	/	/	/	/	/	/	/	/	/	/	/	/	/	/	/	/	/	/	/	/	/	/	/	/	/	/	/	/	/	/	/	/	/	/	/	/	/	/	/	/	/	/	/
K01159	Y	Y	Y	Y	/	/	Y	/	/	Y	Y	Y	/	Y	Y	/	Y	Y	Y	Y	Y	Y	/	/	Y	Y	Y	Y	Y	Y	/	Y	Y	Y	Y	Y	Y	Y	/	Y	Y	Y	/	Y	Y	/	Y	/	/
K01160	/	/	/	/	/	/	/	/	/	/	/	/	/	/	/	/	/	/	/	/	/	/	/	/	/	/	/	/	/	/	/	/	/	/	/	/	/	/	/	/	/	/	/	/	/	/	/	/	/
K01161	/	/	/	/	/	/	/	/	/	/	/	/	/	/	/	/	/	/	/	/	/	/	/	/	/	/	/	/	/	/	/	/	/	/	/	/	/	/	/	/	/	/	/	/	/	/	/	/	/
K01163	/	/	/	/	/	/	/	/	Y	/	/	Y	Y	Y	/	Y	/	/	Y	/	/	/	/	/	Y	/	/	/	/	Y	/	/	/	Y	/	Y	Y	Y	/	Y	/	Y	/	Y	/	Y	Y	/	Y
K01164	/	/	/	/	/	/	/	/	/	/	/	/	/	/	/	/	/	/	/	/	/	/	/	/	/	/	/	/	/	/	/	/	/	/	/	/	/	/	/	/	/	/	/	/	/	/	/	/	/
K01165	/	/	/	/	/	/	/	/	/	/	/	/	/	/	/	/	/	/	/	/	/	/	/	/	/	/	/	/	/	/	/	/	/	/	/	/	/	/	/	/	/	/	/	/	/	/	/	/	/
K01166	/	/	/	/	/	/	/	/	/	/	/	/	/	/	/	/	/	/	/	/	/	/	/	/	/	/	/	/	/	/	/	/	/	/	/	/	/	/	/	/	/	/	/	/	/	/	/	/	/
K01167	/	/	/	/	/	/	/	/	/	/	/	/	/	/	/	/	/	/	/	/	/	/	/	/	/	/	/	/	/	/	/	/	/	/	/	/	/	/	/	/	/	/	/	/	/	/	/	/	/
K01168	/	/	/	/	/	/	/	/	/	/	/	/	/	/	/	/	/	/	/	/	/	/	/	/	/	/	/	/	/	/	/	/	/	/	/	/	/	/	/	/	/	/	/	/	/	/	/	/	/
K01169	/	/	/	/	/	/	/	/	/	/	/	/	/	/	/	/	/	/	/	/	/	/	/	/	/	/	/	/	/	/	/	/	/	/	/	/	/	/	/	/	/	/	/	/	/	/	/	/	/
K01170	/	/	/	/	/	/	/	/	/	/	/	/	/	/	/	/	/	/	/	/	/	/	/	/	/	/	/	/	/	/	Y	/	/	/	/	/	/	/	/	/	/	/	/	/	/	/	/	/	/
K01171	/	/	/	/	/	/	/	/	/	/	/	/	/	/	/	/	/	/	/	/	/	/	/	/	/	/	/	/	/	/	/	/	/	/	/	/	/	/	/	/	/	/	/	/	/	/	/	/	/
K01172	/	/	/	/	/	/	/	/	/	/	/	/	/	/	/	/	/	/	/	/	/	/	/	/	/	/	/	/	/	/	/	/	/	/	/	/	/	/	/	/	/	/	/	/	/	/	/	/	/
K01173	/	/	/	/	/	/	/	/	/	/	/	/	/	/	/	/	/	/	/	/	/	/	/	Y	/	/	/	/	/	/	/	/	/	/	/	/	/	/	/	/	/	/	/	/	/	/	/	/	/
K01174	/	/	/	/	/	/	/	/	/	/	/	Y	/	/	/	/	/	/	/	Y	/	/	Y	/	/	/	Y	/	/	Y	/	/	/	/	/	/	/	Y	Y	/	/	Y	/	/	Y	/	/	/	/
K01175	/	/	/	/	/	/	/	Y	/	/	/	/	/	/	/	/	/	/	/	/	/	Y	/	/	/	/	/	/	/	/	/	/	Y	/	/	/	/	/	/	/	/	/	/	/	/	/	/	/	/
K01176	/	/	/	/	/	/	/	Y	/	/	/	/	/	/	/	/	/	/	/	/	Y	/	/	/	/	Y	/	/	Y	/	/	/	Y	/	/	Y	Y	/	/	/	/	/	Y	/	/	/	/	/	Y
K01177	/	/	/	/	/	/	/	/	/	/	/	/	/	/	/	/	/	/	/	/	/	/	/	/	/	/	/	/	/	/	/	/	/	/	/	/	/	/	/	/	/	/	/	/	/	/	/	/	/
K01178	/	/	/	/	/	/	/	/	/	/	/	/	/	/	/	/	/	/	/	/	/	Y	/	/	/	/	/	/	/	/	/	/	/	/	/	/	Y	/	/	/	/	/	/	/	/	/	/	Y	/
K01179	/	Y	/	Y	/	Y	/	/	/	Y	/	/	/	Y	/	/	/	/	/	/	/	/	/	/	Y	/	Y	/	/	/	/	/	Y	Y	Y	/	Y	Y	/	/	Y	/	/	/	Y	/	/	/	/
K01180	/	/	/	/	/	/	/	/	/	/	/	/	/	/	/	/	/	/	/	/	/	/	/	/	/	/	/	/	/	/	/	/	/	/	/	/	/	/	/	/	/	/	/	/	/	/	/	/	/
K01181	/	Y	/	/	/	/	/	/	/	/	/	/	/	Y	/	/	/	/	/	/	Y	Y	/	/	/	/	Y	/	/	/	/	/	/	/	/	/	Y	/	/	/	Y	/	/	/	/	/	/	/	/
K01182	/	/	/	/	/	/	/	Y	/	/	/	/	/	/	/	/	/	/	/	/	/	/	/	/	/	Y	/	/	Y	/	/	/	/	Y	/	/	/	/	Y	/	/	/	Y	/	/	/	/	/	/
K01183	/	/	/	/	/	/	/	/	/	/	/	/	/	/	/	/	/	/	/	/	/	Y	/	/	/	/	Y	/	Y	/	/	/	/	/	/	/	/	/	/	/	/	/	/	Y	/	/	/	/	/
K01184	/	/	/	/	/	/	/	/	/	/	/	/	/	/	/	/	/	/	/	/	/	/	/	/	/	/	/	/	/	/	/	/	/	/	/	/	/	/	/	/	/	/	/	/	/	/	/	/	/
K01185	/	/	/	/	/	/	/	/	/	/	/	/	/	/	/	/	/	/	/	/	/	/	/	/	/	/	/	/	/	/	/	/	/	/	/	/	/	/	/	/	/	Y	/	/	/	/	/	/	/
K01186	/	/	/	/	/	/	/	/	/	Y	/	/	/	Y	/	/	Y	/	Y	/	/	Y	/	Y	/	/	/	/	/	/	/	/	/	/	Y	/	/	/	/	/	/	/	/	/	/	/	/	/	/
K01187	/	/	/	/	/	/	/	/	/	Y	/	Y	/	Y	/	/	/	/	Y	/	/	/	/	Y	/	/	Y	/	/	/	/	/	Y	/	/	/	Y	/	/	/	/	/	Y	/	/	/	/	/	/
K01188	/	/	/	/	/	/	/	/	/	/	/	/	/	/	/	/	/	/	/	/	/	/	/	/	/	/	/	/	/	/	/	/	/	/	/	/	/	/	/	/	/	/	/	/	/	/	/	/	/
K01189	/	/	/	/	/	/	/	/	/	/	/	/	/	/	/	/	/	/	/	/	/	/	/	/	/	/	/	/	/	/	/	/	/	/	/	/	/	/	/	/	/	/	/	/	/	/	/	/	/
K01190	/	Y	Y	/	/	/	/	/	/	Y	/	Y	/	Y	/	Y	/	/	/	/	Y	Y	/	Y	/	/	Y	/	/	/	/	/	Y	Y	Y	/	Y	/	Y	/	Y	/	/	/	/	/	/	/	Y
K01191	/	Y	Y	/	/	/	/	/	/	Y	/	Y	/	Y	/	Y	Y	/	/	/	/	Y	/	Y	/	/	Y	/	/	/	/	/	/	/	Y	/	/	Y	/	/	Y	/	/	/	/	/	/	Y	/
K01192	/	Y	Y	/	/	/	/	/	/	Y	/	Y	/	Y	/	/	/	/	/	/	/	/	/	Y	/	/	/	/	/	/	/	/	/	/	Y	/	Y	/	/	/	Y	/	/	/	/	/	/	Y	/
K01193	/	Y	/	/	/	/	/	Y	/	/	/	/	/	/	/	/	/	/	/	/	Y	/	/	Y	/	Y	Y	/	/	/	/	/	/	/	Y	/	/	/	/	/	/	/	/	/	/	/	/	/	/
K01194	/	/	/	/	/	/	/	/	/	/	/	/	/	/	/	/	/	/	/	/	/	/	/	/	/	/	/	/	/	/	/	/	/	/	/	/	/	/	/	/	/	/	/	/	/	/	/	/	/
K01195	/	Y	/	/	/	/	/	/	Y	Y	/	/	/	Y	/	Y	/	/	Y	/	/	/	/	Y	/	/	/	/	/	/	/	/	/	/	/	/	/	/	/	/	/	/	/	/	/	/	/	Y	/
K01196	/	/	/	/	/	/	/	/	/	/	/	/	/	/	/	/	/	/	/	/	/	/	/	/	/	/	/	/	/	/	/	/	/	/	/	/	/	/	/	/	/	/	/	/	/	/	/	/	/
K01197	/	/	/	/	/	/	/	/	/	/	/	/	/	/	/	/	/	/	/	/	/	/	/	/	/	/	/	/	/	/	/	/	/	/	/	/	/	/	/	/	/	/	/	/	/	/	/	/	/
K01198	/	/	/	/	/	/	/	/	/	/	/	/	/	/	/	/	/	/	/	/	/	/	/	Y	/	/	/	/	/	/	/	/	/	/	/	/	/	/	/	/	/	/	/	/	/	/	/	/	Y
K01199	/	/	/	/	/	/	/	/	/	/	/	/	/	/	/	/	/	/	/	/	/	/	/	/	/	/	/	/	/	/	/	/	/	/	/	/	/	/	/	/	/	/	/	/	/	/	/	/	/
K01200	/	/	/	/	/	/	/	/	/	/	/	/	/	/	/	/	/	/	/	/	/	Y	/	/	/	Y	/	/	Y	/	/	/	/	Y	/	/	/	/	/	/	/	/	/	/	/	/	/	/	/
K01201	/	Y	/	/	/	/	/	/	/	/	/	/	/	/	/	/	/	/	/	/	/	/	/	/	/	Y	/	/	/	/	/	/	Y	/	/	/	/	/	/	/	Y	Y	/	/	/	/	/	/	/
K01202	/	/	/	/	/	/	/	/	/	/	/	/	/	/	/	/	/	/	/	/	/	/	/	/	/	/	/	/	/	/	/	/	/	/	/	/	/	/	/	/	/	/	/	/	/	/	/	/	/
K01203	/	/	/	/	/	/	/	/	/	/	/	/	/	/	/	/	/	/	/	/	/	/	/	/	/	/	/	/	/	/	/	/	/	/	/	/	/	/	/	/	/	/	/	/	/	/	/	/	/
K01204	/	/	/	/	/	/	/	/	/	/	/	/	/	/	/	/	/	/	/	/	/	/	/	/	/	/	/	/	/	/	/	/	/	/	/	/	/	/	/	/	/	/	/	/	/	/	/	/	/
K01205	/	/	/	/	/	/	/	/	/	/	/	/	/	/	/	/	/	/	/	/	/	/	/	/	/	/	Y	/	/	/	/	/	/	/	/	/	/	/	/	/	/	/	/	/	/	/	/	/	/
K01206	/	Y	Y	/	/	/	/	/	Y	Y	/	Y	/	Y	/	Y	Y	/	Y	/	/	Y	/	Y	/	/	Y	/	/	/	/	/	Y	/	Y	Y	Y	/	/	/	Y	/	/	/	/	Y	/	Y	Y
K01207	/	/	/	/	/	/	/	Y	Y	Y	/	Y	Y	/	/	/	Y	/	/	/	Y	/	/	/	/	/	/	Y	/	Y	/	/	/	Y	Y	/	/	/	Y	Y	/	/	/	/	Y	/	/	Y	/
K01208	/	/	/	/	/	/	/	/	/	/	/	/	/	/	/	/	/	/	/	/	/	/	/	/	Y	Y	/	/	Y	/	/	/	/	/	/	/	/	Y	/	/	/	/	/	/	/	/	/	/	/
K01209	/	Y	/	/	/	/	/	/	/	Y	/	Y	/	Y	/	/	Y	/	Y	/	Y	/	/	Y	/	/	Y	/	/	/	/	/	Y	Y	/	/	Y	/	/	/	Y	/	Y	/	/	/	/	/	Y
K01210	/	/	/	/	/	/	/	/	/	/	/	/	/	/	/	/	/	/	/	/	/	/	/	/	/	/	/	/	/	/	/	/	/	/	/	/	/	/	/	/	/	/	/	/	/	/	/	/	/
K01212	/	/	/	/	/	/	/	/	/	/	/	/	/	/	/	/	/	/	/	/	/	/	/	/	/	/	/	/	/	/	/	/	/	/	/	/	/	/	/	/	/	/	/	/	/	/	/	/	/
K01213	/	/	/	/	/	/	/	/	/	/	/	/	/	/	/	Y	/	/	/	/	/	/	/	/	/	/	/	/	/	/	/	/	Y	/	/	/	Y	/	/	/	/	/	/	/	/	/	/	/	/
K01214	/	Y	/	/	/	/	/	/	/	/	/	/	Y	/	/	/	/	/	/	/	/	/	Y	/	/	/	Y	/	/	/	/	/	/	/	/	/	/	/	/	/	Y	/	Y	/	/	/	/	/	/
K01215	/	/	/	/	/	/	/	/	/	/	/	/	/	/	/	/	/	/	/	/	/	/	/	/	/	/	/	/	/	/	/	/	/	/	/	/	/	/	/	/	/	/	/	/	/	/	/	/	/
K01216	/	/	/	/	/	/	/	/	/	/	/	/	/	/	/	/	/	/	/	/	/	/	/	/	/	/	/	/	/	/	/	/	/	/	/	/	Y	/	/	/	/	/	/	/	/	/	/	/	/
K01217	/	/	/	/	/	/	/	/	/	/	/	/	/	/	/	/	/	/	/	/	/	/	/	/	/	/	/	/	/	/	/	/	/	/	/	/	/	/	/	/	/	/	/	/	/	/	/	/	/
K01218	/	/	/	/	/	/	/	/	/	/	/	/	/	/	/	/	/	/	/	/	/	/	/	/	/	/	/	/	/	/	/	/	/	Y	/	/	Y	/	/	/	/	/	/	/	/	/	/	/	/
K01219	/	/	/	/	/	/	/	/	/	/	/	/	/	Y	/	/	/	/	/	/	/	/	/	/	/	/	Y	/	/	/	/	/	/	/	Y	/	/	/	/	/	Y	/	/	/	/	/	/	/	/
K01220	/	/	/	/	/	/	/	/	/	/	/	/	/	/	/	/	/	/	/	/	/	/	/	/	/	/	/	/	/	/	/	/	/	/	/	/	/	/	/	/	/	/	/	/	/	/	/	/	/
K01222	Y	Y	/	/	/	/	/	/	/	Y	/	/	/	/	/	/	/	/	/	/	/	/	/	/	/	/	/	/	/	/	/	/	/	/	/	/	/	/	Y	/	Y	/	/	/	/	/	/	/	/
K01223	/	/	/	/	/	/	/	/	/	/	/	/	/	/	/	/	/	/	/	/	/	/	/	/	/	/	/	/	/	/	/	/	/	/	/	/	/	/	/	/	/	/	Y	/	/	/	/	/	/
K01224	/	/	/	/	/	/	/	/	/	/	/	/	/	/	/	/	/	/	/	/	/	/	/	/	/	/	/	/	/	/	/	/	Y	/	/	/	/	/	/	/	/	/	/	/	/	/	/	/	/
K01225	/	/	/	/	/	/	/	/	/	/	/	/	/	/	/	/	/	/	/	/	/	/	/	/	/	/	/	/	/	/	/	/	/	/	/	/	/	/	/	/	/	/	/	/	/	/	/	/	/
K01226	/	/	/	/	/	/	/	/	/	/	/	/	/	/	/	/	/	/	/	/	/	/	/	/	/	/	/	/	/	/	/	/	/	/	/	/	/	/	/	/	/	/	/	/	/	/	/	/	/
K01227	/	/	/	/	/	/	/	/	/	/	/	/	/	/	/	/	/	/	/	/	/	/	/	/	/	/	/	/	/	/	/	/	/	/	/	/	/	/	/	/	/	/	/	/	/	/	/	/	/
K01228	/	/	/	/	/	/	/	/	/	/	/	/	/	/	/	/	/	/	/	/	/	/	/	/	/	/	/	/	/	/	/	/	/	/	/	/	/	/	/	/	/	/	/	/	/	/	/	/	/
K01229	/	/	/	/	/	/	/	/	/	/	/	/	/	/	/	/	/	/	/	/	/	/	/	/	/	/	/	/	/	/	/	/	/	/	/	/	/	/	/	/	/	/	/	/	/	/	/	/	/
K01230	/	/	/	/	/	/	/	/	/	/	/	/	/	/	/	/	/	/	/	/	/	/	/	/	/	/	/	/	/	/	/	/	/	/	/	/	/	/	/	/	/	/	/	/	/	/	/	/	/
K01231	/	/	/	/	/	/	/	/	/	/	/	/	/	/	/	/	/	/	/	/	/	/	/	/	/	/	/	/	/	/	/	/	/	/	/	/	/	/	/	/	/	/	/	/	/	/	/	/	/
K01232	/	/	/	/	/	/	/	/	/	/	/	/	/	/	/	/	/	/	/	/	/	/	/	/	/	/	/	/	/	/	/	/	/	/	/	/	/	/	/	/	/	/	/	/	/	/	/	/	/
K01233	/	/	/	/	/	/	/	/	/	/	/	/	/	/	/	/	/	/	/	/	/	/	/	/	/	/	/	/	/	/	/	/	/	/	/	/	/	/	/	/	/	/	/	/	/	/	/	/	/
K01235	/	/	/	/	/	/	/	/	/	/	/	/	/	/	/	/	/	/	/	/	/	/	/	/	/	/	/	/	/	/	/	/	/	Y	/	/	/	/	/	/	/	/	/	/	/	/	/	/	Y
K01236	/	/	/	/	/	/	/	/	/	/	/	/	Y	/	Y	/	/	/	/	/	Y	/	/	/	/	/	/	Y	/	/	/	Y	/	/	/	/	/	/	/	/	/	/	Y	/	/	/	/	/	/
K01237	/	/	/	/	/	/	/	/	/	/	/	/	/	/	/	/	/	/	/	/	/	/	/	/	/	/	/	/	/	/	/	/	/	/	/	/	/	/	/	/	/	/	/	/	/	/	/	/	/
K01238	/	/	/	/	/	/	/	/	/	/	/	/	/	/	/	/	/	/	/	/	/	/	/	/	/	/	/	/	/	/	/	/	/	/	/	/	/	/	/	/	/	/	/	/	/	/	/	/	/
K01239	Y	/	Y	/	/	/	/	Y	/	Y	/	Y	/	Y	/	/	Y	/	Y	/	Y	/	/	Y	/	/	Y	/	/	/	/	/	/	/	/	/	/	/	/	/	Y	/	/	/	Y	/	/	Y	/
K01240	/	/	/	/	/	/	/	/	/	/	/	/	/	/	/	/	/	/	/	/	/	/	/	/	/	/	/	/	/	/	/	/	/	/	/	/	/	/	/	/	/	/	/	/	/	/	/	/	/
K01241	/	/	/	/	/	Y	/	/	/	/	/	/	/	/	/	/	/	/	/	/	/	Y	/	/	/	/	/	/	/	/	/	/	Y	/	/	/	Y	/	/	/	/	/	/	/	/	/	/	/	/
K01242	/	/	/	/	/	/	/	/	/	/	/	/	/	/	/	/	/	/	/	/	/	/	/	/	/	/	/	/	/	/	/	/	/	/	/	/	/	/	/	/	/	/	/	/	/	/	/	/	/
K01243	/	/	/	/	/	/	/	/	/	/	/	/	/	/	/	/	/	/	/	Y	/	/	/	/	/	Y	/	/	Y	/	/	/	/	/	/	/	/	/	Y	/	/	/	Y	/	/	/	/	/	/
K01244	/	/	/	/	/	/	/	/	/	/	/	/	/	/	/	/	/	/	/	/	/	/	/	/	/	/	/	/	/	/	/	/	/	/	/	/	/	/	/	/	/	/	/	/	/	/	/	/	/
K01245	/	/	/	/	/	/	/	/	/	/	/	/	/	/	/	/	/	/	/	/	/	/	/	/	/	/	/	/	/	/	/	/	/	/	/	/	/	/	/	/	/	/	/	/	/	/	/	/	/
K01246	/	/	/	/	/	/	/	Y	/	Y	/	/	/	Y	/	Y	/	/	Y	Y	Y	/	/	Y	/	/	/	/	/	Y	/	/	/	Y	/	Y	/	/	/	Y	/	Y	/	/	/	Y	/	Y	/
K01247	Y	/	/	/	/	/	Y	/	/	/	/	Y	/	/	/	/	/	/	/	/	/	Y	/	/	/	Y	/	/	Y	/	/	/	/	/	/	/	/	/	Y	/	/	/	/	Y	/	/	Y	/	Y
K01250	/	/	/	/	/	/	/	/	/	/	/	/	/	/	/	/	/	/	/	/	/	/	/	/	/	/	/	/	/	/	/	/	Y	/	/	/	/	/	/	/	/	/	/	/	/	/	/	/	/
K01251	/	Y	Y	Y	Y	Y	Y	Y	Y	Y	Y	Y	Y	Y	Y	Y	Y	Y	Y	Y	Y	/	Y	Y	Y	/	Y	Y	/	Y	Y	Y	Y	Y	/	/	Y	Y	/	Y	Y	Y	/	Y	Y	/	Y	/	Y
K01252	/	/	/	/	/	/	/	/	/	/	/	/	/	/	/	/	/	/	/	/	/	/	/	/	/	/	/	/	/	/	/	/	/	/	/	/	/	/	/	/	/	/	/	/	/	/	/	/	/
K01253	/	/	/	/	/	/	/	/	/	/	/	/	/	/	/	/	/	/	/	/	/	/	/	/	/	/	/	/	/	/	/	/	/	/	/	/	/	/	/	/	/	/	Y	/	/	/	/	/	/
K01254	/	/	/	/	/	/	/	/	/	/	/	/	/	/	/	/	/	/	/	/	/	/	/	/	/	/	/	/	/	/	/	/	/	/	/	/	/	/	/	/	/	/	/	/	/	/	/	/	/
K01255	Y	Y	Y	Y	Y	Y	Y	Y	/	/	/	Y	Y	/	/	Y	/	/	/	/	Y	Y	Y	Y	Y	Y	/	/	Y	Y	/	Y	Y	Y	Y	/	/	Y	Y	/	Y	Y	Y	/	/	Y	Y	Y	Y
K01256	/	/	/	/	/	/	/	Y	/	/	/	/	/	/	/	/	/	/	/	/	Y	/	Y	/	/	/	/	/	/	/	/	/	Y	/	Y	/	/	/	/	/	/	/	Y	Y	/	/	/	/	/
K01257	/	/	/	/	/	/	/	/	/	/	/	/	/	/	/	/	/	/	/	/	/	/	/	/	/	/	/	/	/	/	/	/	/	/	/	/	/	/	/	/	/	/	/	/	/	/	/	/	/
K01258	Y	/	Y	Y	Y	/	/	/	/	/	/	Y	/	Y	/	Y	/	Y	/	/	/	/	Y	Y	Y	Y	Y	/	Y	/	/	Y	/	Y	/	Y	Y	Y	/	/	/	Y	/	Y	/	Y	/	Y	/
K01259	/	/	/	/	/	/	/	Y	/	/	/	/	/	/	Y	/	/	/	/	Y	Y	/	/	Y	/	/	/	/	/	/	/	/	/	/	/	/	Y	/	/	/	/	/	Y	Y	/	/	Y	/	/
K01260	/	/	/	/	/	/	/	/	/	/	/	/	/	/	/	/	/	/	/	/	/	/	/	/	/	/	/	/	/	/	/	/	/	/	/	/	/	/	/	/	/	/	/	/	/	/	/	/	/
K01261	/	/	/	/	/	/	/	/	/	/	/	/	/	/	/	/	/	/	/	/	/	/	/	/	/	/	/	/	/	/	/	/	/	/	/	/	/	/	Y	/	/	/	/	/	/	/	/	/	/
K01262	Y	Y	Y	/	Y	Y	Y	/	Y	Y	Y	Y	Y	/	/	/	Y	Y	Y	Y	Y	Y	Y	Y	Y	Y	Y	Y	/	Y	Y	/	Y	Y	Y	/	Y	Y	Y	Y	Y	Y	Y	Y	Y	Y	Y	Y	Y
K01263	/	/	/	/	/	/	/	/	/	/	/	/	/	/	/	/	/	/	/	/	/	/	/	/	/	/	/	/	/	/	/	/	/	/	/	/	/	/	/	/	/	/	/	/	/	/	/	/	/
K01264	/	/	/	/	/	/	/	/	/	/	/	/	/	/	/	/	/	/	/	/	/	/	/	/	/	/	/	/	/	/	/	/	/	/	/	/	/	/	/	/	/	/	/	/	/	/	/	/	/
K01265	Y	Y	Y	Y	Y	Y	Y	Y	/	/	Y	Y	Y	Y	Y	Y	Y	Y	Y	Y	Y	Y	Y	/	Y	Y	Y	Y	Y	Y	Y	Y	Y	Y	Y	Y	Y	Y	Y	Y	Y	Y	Y	Y	Y	Y	Y	Y	Y
K01266	/	/	/	/	Y	/	/	/	/	/	Y	/	/	Y	/	/	/	/	/	Y	/	/	/	Y	/	/	/	/	/	/	/	/	/	/	/	/	/	/	Y	/	/	/	/	Y	/	/	/	/	/
K01267	/	/	/	/	/	/	/	/	/	/	/	/	/	/	/	Y	/	Y	/	/	Y	/	/	/	Y	/	/	/	/	/	/	/	/	/	/	/	/	Y	/	Y	/	Y	/	/	/	/	/	/	/
K01268	/	/	/	/	/	/	/	/	/	/	/	/	/	/	/	/	/	/	/	/	/	/	/	/	/	/	/	/	/	/	/	/	/	/	/	/	/	/	/	/	/	/	/	/	/	/	/	/	/
K01269	Y	Y	/	Y	/	/	/	/	Y	Y	/	/	/	Y	/	/	/	Y	/	/	/	/	/	Y	/	Y	/	/	Y	/	/	/	Y	/	Y	Y	/	/	Y	/	/	/	/	Y	/	Y	/	/	/
K01270	/	/	/	/	/	/	/	/	Y	/	/	/	/	/	/	/	/	Y	/	/	/	Y	/	/	/	/	/	/	/	/	Y	/	Y	/	/	/	Y	/	/	/	/	/	/	Y	/	/	/	/	/
K01271	/	Y	/	/	/	/	Y	/	/	Y	Y	/	Y	Y	Y	Y	/	/	Y	Y	Y	Y	Y	Y	Y	/	/	Y	Y	Y	/	Y	/	Y	/	Y	Y	Y	Y	Y	/	/	Y	Y	/	/	/	/	/
K01273	Y	Y	/	/	/	Y	Y	/	Y	Y	/	/	/	Y	Y	/	/	Y	Y	Y	/	Y	/	Y	/	Y	/	/	Y	/	/	Y	Y	Y	/	Y	/	/	/	/	Y	/	/	Y	/	Y	Y	/	/
K01274	/	/	/	/	/	/	/	/	/	/	/	/	/	/	/	/	/	/	/	/	/	/	/	/	/	/	/	/	/	/	/	/	/	/	/	/	/	/	/	/	/	/	/	/	/	/	Y	/	/
K01275	/	/	/	/	/	/	/	/	/	/	/	/	/	/	/	/	/	/	/	/	/	/	/	/	/	/	/	/	/	/	/	/	/	/	/	/	/	/	/	/	/	/	/	/	/	/	/	/	/
K01276	/	/	/	/	/	/	/	/	/	/	/	/	/	/	/	/	/	/	/	/	/	/	/	/	/	/	/	/	/	/	/	/	/	/	/	/	/	/	/	/	/	/	/	/	/	/	/	/	/
K01277	/	/	/	/	/	/	/	/	/	/	/	/	/	/	/	/	/	/	/	/	/	/	/	/	/	/	/	/	/	/	/	/	/	/	/	/	Y	/	/	/	/	/	/	Y	/	/	/	/	/
K01278	/	/	/	/	/	/	/	/	Y	/	/	/	/	/	/	/	/	/	/	/	/	Y	/	/	/	/	/	/	/	/	/	/	Y	/	Y	/	Y	/	/	/	/	/	/	Y	/	/	/	/	/
K01279	/	/	/	/	/	/	/	/	/	/	/	/	/	/	/	/	/	/	/	/	/	/	/	/	/	/	/	/	/	/	/	/	/	/	/	/	/	/	/	/	/	/	/	/	/	/	/	/	/
K01280	/	/	/	/	/	/	/	/	/	/	/	/	/	/	/	/	/	/	/	/	/	/	/	/	/	/	/	/	/	/	/	/	/	/	/	/	/	/	/	/	/	/	/	/	/	/	/	/	/
K01281	/	/	/	/	/	/	/	/	/	/	/	/	/	/	/	/	/	/	/	/	/	/	/	/	/	/	/	/	/	/	/	/	/	/	/	/	/	/	/	/	/	/	/	/	/	/	/	/	/
K01282	/	/	/	/	/	/	/	/	/	/	/	/	/	/	/	/	/	/	/	/	/	/	/	/	/	/	/	/	/	/	/	/	/	/	/	/	/	/	/	/	/	/	/	/	/	/	/	/	/
K01283	/	/	/	/	/	/	/	/	/	/	/	/	/	/	/	/	/	/	/	/	/	/	/	/	/	/	Y	/	/	/	/	/	/	/	/	/	/	/	/	/	/	/	/	Y	/	/	/	/	/
K01284	/	/	/	/	/	/	/	Y	/	/	/	/	/	/	/	/	/	/	/	/	/	Y	/	/	/	/	/	/	/	/	/	/	Y	/	/	/	Y	Y	/	/	/	Y	Y	Y	/	Y	/	/	/
K01285	/	/	/	/	/	/	/	/	/	/	/	/	/	/	/	/	/	/	/	/	/	/	/	/	/	/	/	/	/	/	/	/	/	/	/	/	/	/	/	/	/	/	/	/	/	/	/	/	/
K01286	/	/	/	/	/	/	/	Y	Y	/	Y	/	/	/	/	/	/	/	/	/	/	/	/	/	/	/	/	/	/	/	Y	/	Y	/	Y	/	/	/	/	/	/	Y	/	Y	/	/	/	/	/
K01288	/	/	/	/	/	/	/	/	/	/	/	/	/	/	/	/	/	/	/	/	/	/	/	/	/	/	/	/	/	/	/	/	/	/	/	/	/	/	/	/	/	/	/	/	/	/	/	/	/
K01290	/	/	/	/	/	/	/	/	/	/	/	/	/	/	/	/	/	/	/	/	/	/	/	/	/	/	/	/	/	/	/	/	/	/	/	/	/	/	/	/	/	/	/	/	/	/	/	/	/
K01291	/	/	/	/	/	/	/	/	/	/	/	/	/	/	/	/	/	/	/	/	/	/	/	/	/	/	/	/	/	/	/	/	/	/	/	/	/	/	/	/	/	/	/	/	/	/	/	/	/
K01292	/	/	/	/	/	/	/	/	/	/	/	/	/	/	/	/	/	/	/	/	/	/	/	/	/	/	/	/	/	/	/	/	/	/	/	/	/	/	/	/	/	/	/	/	/	/	/	/	/
K01293	/	/	/	/	/	/	/	/	/	/	/	/	/	/	/	/	/	/	/	/	/	/	/	/	/	/	/	/	/	/	/	/	/	/	/	/	/	/	/	/	/	/	/	/	/	/	/	/	/
K01294	/	/	/	/	/	/	/	/	/	/	/	/	/	/	/	/	/	/	/	/	/	/	/	/	/	/	/	/	/	/	/	/	/	/	/	/	/	/	/	/	/	/	/	/	/	/	/	/	/
K01295	/	/	/	/	/	/	Y	Y	Y	/	/	/	Y	/	/	/	/	/	/	/	/	/	/	Y	/	/	/	/	/	Y	/	/	/	/	/	/	/	/	/	/	/	/	/	/	/	/	/	/	/
K01296	/	/	/	/	/	/	/	/	/	/	/	/	/	/	/	/	/	/	/	/	/	/	/	/	/	/	/	/	/	/	/	/	/	/	/	/	/	/	/	/	/	/	/	/	/	/	/	/	/
K01297	/	/	/	/	/	/	Y	/	/	/	/	/	Y	/	/	/	/	/	/	Y	/	Y	/	/	/	/	/	/	/	/	/	/	Y	/	Y	/	Y	/	Y	/	/	/	Y	/	/	Y	/	/	/
K01298	/	/	/	/	/	/	/	/	/	/	/	/	/	/	/	/	/	/	/	/	/	/	/	/	/	/	/	/	/	/	/	/	/	/	/	/	/	/	/	/	/	/	/	/	/	/	/	/	/
K01299	/	/	/	/	/	/	/	/	/	Y	/	/	/	/	/	/	/	/	/	/	/	/	/	/	/	/	Y	/	/	/	/	/	/	/	/	/	/	/	Y	Y	Y	/	/	/	/	/	/	/	/
K01300	/	/	/	/	/	/	/	/	/	/	/	/	/	/	/	/	/	/	/	/	/	/	/	/	/	/	/	/	/	/	/	/	/	/	/	/	/	/	/	/	/	/	/	/	/	/	/	/	/
K01301	/	/	/	/	/	/	/	/	/	/	/	/	/	/	/	/	/	/	/	/	/	/	/	/	/	/	/	/	/	/	/	/	/	/	/	/	/	/	/	/	/	/	/	/	/	/	/	/	/
K01302	/	/	/	/	/	/	/	/	/	/	/	/	/	/	/	/	/	/	/	/	/	/	/	/	/	/	/	/	/	/	/	/	/	/	/	/	/	/	/	/	/	/	/	/	/	/	/	/	/
K01303	Y	/	/	/	/	/	/	/	/	/	/	/	/	/	/	/	/	Y	/	/	/	Y	/	/	/	Y	/	/	Y	Y	/	/	Y	/	/	/	Y	/	/	/	/	/	/	Y	Y	Y	/	Y	/
K01304	Y	/	/	/	/	/	/	/	/	/	/	/	/	/	/	/	/	/	/	/	/	/	/	/	/	Y	/	/	Y	Y	/	/	/	/	Y	Y	/	/	Y	/	/	/	/	/	/	/	/	/	/
K01305	/	/	/	/	/	/	/	/	/	/	/	/	/	/	/	/	/	/	/	/	/	/	/	/	/	Y	/	/	Y	/	/	/	/	/	/	/	/	/	/	/	/	/	/	/	/	/	Y	/	/
K01306	/	/	/	/	/	/	/	/	/	/	/	/	/	/	/	/	/	/	/	/	/	/	/	/	/	/	/	/	/	/	/	/	/	/	/	/	/	/	/	/	/	/	/	/	/	/	/	/	/
K01307	/	/	/	/	/	/	/	/	/	/	/	/	/	/	/	/	/	/	/	/	/	/	/	/	/	/	/	/	/	/	/	/	/	/	/	/	/	/	/	/	/	/	/	/	/	/	/	/	/
K01308	/	/	/	/	/	/	/	/	/	/	/	/	/	/	/	/	/	/	/	/	/	/	/	/	/	/	/	/	/	/	/	/	/	Y	/	/	/	/	/	/	/	/	/	/	/	/	/	/	/
K01310	/	/	/	/	/	/	/	/	/	/	/	/	/	/	/	/	/	/	/	/	/	/	/	/	/	/	/	/	/	/	/	/	/	/	/	/	/	/	/	/	/	/	/	/	/	/	/	/	/
K01311	/	/	/	/	/	/	/	/	/	/	/	/	/	/	/	/	/	/	/	/	/	/	/	/	/	/	/	/	/	/	/	/	/	/	/	/	/	/	/	/	/	/	/	/	/	/	/	/	/
K01312	/	/	/	/	/	/	/	/	/	/	/	/	/	/	/	/	/	/	/	/	/	/	/	/	/	/	/	/	/	/	/	/	/	/	/	/	/	/	/	/	/	/	/	/	/	/	/	/	/
K01313	/	/	/	/	/	/	/	/	/	/	/	/	/	/	/	/	/	/	/	/	/	/	/	/	/	/	/	/	/	/	/	/	/	/	/	/	/	/	/	/	/	/	/	/	/	/	/	/	/
K01314	/	/	/	/	/	/	/	/	/	/	/	/	/	/	/	/	/	/	/	/	/	/	/	/	/	/	/	/	/	/	/	/	/	/	/	/	/	/	/	/	/	/	/	/	/	/	/	/	/
K01315	/	/	/	/	/	/	/	/	/	/	/	/	/	/	/	/	/	/	/	/	/	/	/	/	/	/	/	/	/	/	/	/	/	/	/	/	/	/	/	/	/	/	/	/	/	/	/	/	/
K01316	/	/	/	/	/	/	/	/	/	/	/	/	/	/	/	/	/	/	/	/	/	/	/	/	/	/	/	/	/	/	/	/	/	/	/	/	/	/	/	/	/	/	/	/	/	/	/	/	/
K01317	/	/	/	/	/	/	/	/	/	/	/	/	/	/	/	/	/	/	/	/	/	/	/	/	/	/	/	/	/	/	/	/	/	/	/	/	/	/	/	/	/	/	/	/	/	/	/	/	/
K01318	/	/	/	/	/	/	/	/	/	/	/	/	/	/	/	/	/	/	/	/	/	/	/	/	/	/	/	/	/	/	/	/	/	/	/	/	/	/	/	/	/	/	/	/	/	/	/	/	/
K01319	/	/	/	/	/	/	/	/	/	/	/	/	/	/	/	/	/	/	/	/	/	/	/	/	/	/	/	/	/	/	/	/	/	/	/	/	/	/	/	/	/	/	/	/	/	/	/	/	/
K01320	/	/	/	/	/	/	/	/	/	/	/	/	/	/	/	/	/	/	/	/	/	/	/	/	/	/	/	/	/	/	/	/	/	/	/	/	/	/	/	/	/	/	/	/	/	/	/	/	/
K01321	/	/	/	/	/	/	/	/	/	/	/	/	/	/	/	/	/	/	/	/	/	/	/	/	/	/	/	/	/	/	/	/	/	/	/	/	/	/	/	/	/	/	/	/	/	/	/	/	/
K01322	Y	/	/	/	/	Y	/	/	/	/	/	/	/	/	/	/	/	/	/	/	/	Y	/	/	/	Y	Y	/	Y	/	/	/	/	/	Y	/	/	Y	/	/	/	/	Y	/	/	Y	/	/	/
K01323	/	/	/	/	/	/	/	/	/	/	/	/	/	/	/	/	/	/	/	/	/	/	/	/	/	/	/	/	/	/	/	/	/	/	/	/	/	/	/	/	/	/	/	/	/	/	/	/	/
K01324	/	/	/	/	/	/	/	/	/	/	/	/	/	/	/	/	/	/	/	/	/	/	/	/	/	/	/	/	/	/	/	/	/	/	/	/	/	/	/	/	/	/	/	/	/	/	/	/	/
K01325	/	/	/	/	/	/	/	/	/	/	/	/	/	/	/	/	/	/	/	/	/	/	/	/	/	/	/	/	/	/	/	/	/	/	/	/	/	/	/	/	/	/	/	/	/	/	/	/	/
K01326	/	/	/	/	/	/	/	/	/	/	/	/	/	/	/	/	/	/	/	/	/	/	/	/	/	/	/	/	/	/	/	/	/	/	/	/	/	/	/	/	/	/	/	/	/	/	/	/	/
K01327	/	/	/	/	/	/	/	/	/	/	/	/	/	/	/	/	/	/	/	/	/	/	/	/	/	/	/	/	/	/	/	/	/	/	/	/	/	/	/	/	/	/	/	/	/	/	/	/	/
K01328	/	/	/	/	/	/	/	/	/	/	/	/	/	/	/	/	/	/	/	/	/	/	/	/	/	/	/	/	/	/	/	/	/	/	/	/	/	/	/	/	/	/	/	/	/	/	/	/	/
K01329	/	/	/	/	/	/	/	/	/	/	/	/	/	/	/	/	/	/	/	/	/	/	/	/	/	/	/	/	/	/	/	/	/	/	/	/	/	/	/	/	/	/	/	/	/	/	/	/	/
K01330	/	/	/	/	/	/	/	/	/	/	/	/	/	/	/	/	/	/	/	/	/	/	/	/	/	/	/	/	/	/	/	/	/	/	/	/	/	/	/	/	/	/	/	/	/	/	/	/	/
K01331	/	/	/	/	/	/	/	/	/	/	/	/	/	/	/	/	/	/	/	/	/	/	/	/	/	/	/	/	/	/	/	/	/	/	/	/	/	/	/	/	/	/	/	/	/	/	/	/	/
K01332	/	/	/	/	/	/	/	/	/	/	/	/	/	/	/	/	/	/	/	/	/	/	/	/	/	/	/	/	/	/	/	/	/	/	/	/	/	/	/	/	/	/	/	/	/	/	/	/	/
K01333	/	/	/	/	/	/	/	/	/	/	/	/	/	/	/	/	/	/	/	/	/	/	/	/	/	/	/	/	/	/	/	/	/	/	/	/	/	/	/	/	/	/	/	/	/	/	/	/	/
K01334	/	/	/	/	/	/	/	/	/	/	/	/	/	/	/	/	/	/	/	/	/	/	/	/	/	/	/	/	/	/	/	/	/	/	/	/	/	/	/	/	/	/	/	/	/	/	/	/	/
K01335	/	/	/	/	/	/	/	/	/	/	/	/	/	/	/	/	/	/	/	/	/	/	/	/	/	/	/	/	/	/	/	/	/	/	/	/	/	/	/	/	/	/	/	/	/	/	/	/	/
K01336	/	/	/	/	/	/	/	/	/	/	/	/	/	/	/	/	/	/	/	/	/	/	/	/	/	/	/	/	/	/	/	/	/	/	/	/	/	/	/	/	/	/	/	/	/	/	/	/	/
K01337	/	/	/	/	/	/	/	/	/	/	/	/	/	/	/	/	/	/	/	/	/	Y	/	/	/	/	/	/	/	/	/	/	/	/	/	/	/	/	/	/	/	/	/	/	/	/	/	/	/
K01338	Y	Y	Y	Y	Y	Y	Y	/	Y	Y	Y	Y	Y	Y	Y	Y	Y	Y	Y	Y	/	Y	Y	Y	Y	Y	Y	Y	Y	Y	/	Y	Y	Y	/	Y	Y	/	Y	Y	Y	Y	/	Y	Y	Y	Y	Y	Y
K01339	/	/	/	/	/	/	/	/	/	/	/	/	/	/	/	/	/	/	/	/	/	/	/	/	/	/	/	/	/	/	/	/	/	/	/	/	/	/	/	/	/	/	/	/	/	/	/	/	/
K01340	/	/	/	/	/	/	/	/	/	/	/	/	/	/	/	/	/	/	/	/	/	/	/	/	/	/	/	/	/	/	/	/	/	/	/	/	/	/	/	/	/	/	/	/	/	/	/	/	/
K01341	/	/	/	/	/	/	/	/	/	/	/	/	/	/	/	/	/	/	/	/	/	/	/	/	/	/	/	/	/	/	/	/	/	/	/	/	/	/	/	/	/	/	/	/	/	/	/	/	/
K01342	/	Y	/	/	/	/	/	/	/	/	/	/	/	Y	/	/	/	/	/	/	/	/	/	/	/	/	/	/	/	/	/	/	/	/	/	/	/	/	/	/	/	/	/	/	/	/	/	/	Y
K01343	/	/	/	/	/	/	/	/	/	/	/	/	/	/	/	/	/	/	/	/	/	/	/	/	/	/	/	/	/	/	/	/	/	/	/	/	/	/	/	/	/	/	/	/	/	/	/	/	/
K01344	/	/	/	/	/	/	/	/	/	/	/	/	/	/	/	/	/	/	/	/	/	/	/	/	/	/	/	/	/	/	/	/	/	/	/	/	/	/	/	/	/	/	/	/	/	/	/	/	/
K01345	/	/	/	/	/	/	/	/	/	/	/	/	/	/	/	/	/	/	/	/	/	/	/	/	/	/	/	/	/	/	/	/	/	/	/	/	/	/	/	/	/	/	/	/	/	/	/	/	/
K01346	/	/	/	/	/	/	/	/	/	/	/	/	/	/	/	/	/	/	/	/	/	/	/	/	/	/	/	/	/	/	/	/	/	/	/	/	/	/	/	/	/	/	/	/	/	/	/	/	/
K01347	/	/	/	/	/	/	/	/	/	/	/	/	/	/	/	/	/	/	/	/	/	/	/	/	/	/	/	/	/	/	/	/	/	/	/	/	/	/	/	/	/	/	/	/	/	/	/	/	/
K01348	/	/	/	/	/	/	/	/	/	/	/	/	/	/	/	/	/	/	/	/	/	/	/	/	/	/	/	/	/	/	/	/	/	/	/	/	/	/	/	/	/	/	/	/	/	/	/	/	/
K01349	/	/	/	/	/	/	/	/	/	/	/	/	/	/	/	/	/	/	/	/	/	/	/	/	/	/	/	/	/	/	/	/	/	/	/	/	/	/	/	/	/	/	/	/	/	/	/	/	/
K01350	/	/	/	/	/	/	/	/	/	/	/	/	/	/	/	/	/	/	/	/	/	/	/	/	/	/	/	/	/	/	/	/	/	/	/	/	/	/	/	/	/	/	/	/	/	/	/	/	/
K01351	/	/	/	/	/	/	/	/	/	/	/	/	/	/	/	/	/	/	/	/	/	/	/	/	/	/	/	/	/	/	/	/	/	/	/	/	/	/	/	/	/	/	/	/	/	/	/	/	/
K01352	/	/	/	/	/	/	/	/	/	/	/	/	/	/	/	/	/	/	/	/	/	/	/	/	/	/	/	/	/	/	/	/	/	/	/	/	/	/	/	/	/	/	/	/	/	/	/	/	/
K01353	/	/	/	/	/	/	/	/	/	/	/	/	/	/	/	/	/	/	/	/	/	/	/	/	/	/	/	/	/	/	/	/	/	/	/	/	/	/	/	/	/	/	/	/	/	/	/	/	/
K01354	/	/	/	/	/	Y	/	Y	/	/	/	/	/	/	/	/	/	Y	/	/	/	Y	/	/	/	/	/	/	/	/	/	/	/	/	/	/	/	/	/	/	/	/	/	Y	/	/	/	/	/
K01355	/	/	/	/	/	/	/	/	/	/	/	/	/	/	/	/	/	/	/	/	/	/	/	/	/	/	/	/	/	/	/	/	/	/	/	/	/	/	/	/	/	/	/	/	/	/	/	/	/
K01356	Y	Y	Y	/	Y	/	Y	/	Y	Y	/	Y	Y	Y	Y	Y	Y	Y	Y	/	Y	/	Y	Y	Y	Y	Y	Y	Y	/	/	Y	/	Y	Y	/	/	Y	/	/	Y	Y	Y	/	/	/	/	Y	Y
K01357	/	/	/	/	/	/	/	/	/	/	/	/	/	/	/	/	/	/	/	/	/	/	/	/	/	/	/	/	/	/	/	/	/	/	/	/	/	/	/	/	/	/	/	/	/	/	/	/	/
K01358	Y	Y	Y	Y	Y	Y	Y	Y	/	Y	Y	Y	Y	Y	Y	Y	Y	Y	Y	Y	Y	Y	Y	Y	Y	Y	Y	Y	Y	Y	/	Y	Y	Y	Y	Y	Y	Y	Y	Y	Y	Y	Y	Y	Y	Y	Y	Y	Y
K01359	/	/	/	/	/	/	/	/	/	/	/	/	/	/	/	/	/	/	/	/	/	/	/	/	/	/	/	/	/	/	/	/	/	/	/	/	/	/	/	/	/	/	/	/	/	/	/	/	/
K01360	/	/	/	/	/	/	/	/	/	/	/	/	/	/	/	/	/	/	/	/	/	/	/	/	/	/	/	/	/	/	/	/	/	/	/	/	/	/	/	/	/	/	/	/	/	/	/	/	/
K01361	/	/	/	/	/	/	/	/	/	/	/	/	/	/	/	/	/	/	/	/	/	/	/	/	/	/	/	/	/	/	/	/	/	/	/	/	/	/	/	/	/	/	/	/	/	/	/	/	/
K01362	/	/	/	/	/	/	/	/	/	/	/	/	/	/	/	/	/	/	/	/	/	/	/	/	/	/	/	/	/	/	/	/	/	/	/	/	/	/	/	/	/	/	/	/	/	/	/	/	/
K01363	/	/	/	/	/	/	/	/	/	/	/	/	/	/	/	/	/	/	/	/	/	/	/	/	/	/	/	/	/	/	/	/	/	/	/	/	/	/	/	/	/	/	/	/	/	/	/	/	/
K01364	/	/	/	/	/	/	/	/	/	/	/	/	/	/	/	/	/	/	/	/	/	/	/	/	/	/	/	/	/	/	/	/	/	/	/	/	/	/	/	/	/	/	/	/	/	/	/	/	/
K01365	/	/	/	/	/	/	/	/	/	/	/	/	/	/	/	/	/	/	/	/	/	/	/	/	/	/	/	/	/	/	/	/	/	/	/	/	/	/	/	/	/	/	/	/	/	/	/	/	/
K01366	/	/	/	/	/	/	/	/	/	/	/	/	/	/	/	/	/	/	/	/	/	/	/	/	/	/	/	/	/	/	/	/	/	/	/	/	/	/	/	/	/	/	/	/	/	/	/	/	/
K01367	/	/	/	/	/	/	/	/	/	/	/	/	/	/	/	/	/	/	/	/	/	/	/	/	/	/	/	/	/	/	/	/	/	/	/	/	/	/	/	/	/	/	/	/	/	/	/	/	/
K01368	/	/	/	/	/	/	/	/	/	/	/	/	/	/	/	/	/	/	/	/	/	/	/	/	/	/	/	/	/	/	/	/	/	/	/	/	/	/	/	/	/	/	/	/	/	/	/	/	/
K01369	/	/	/	/	/	/	/	/	/	/	/	/	/	/	/	/	/	/	/	/	/	/	/	/	/	/	/	/	/	/	/	/	/	/	/	/	/	/	/	/	/	/	/	/	/	/	/	/	/
K01370	/	/	/	/	/	/	/	/	/	/	/	/	/	/	/	/	/	/	/	/	/	/	/	/	/	/	/	/	/	/	/	/	/	/	/	/	/	/	/	/	/	/	/	/	/	/	/	/	/
K01371	/	/	/	/	/	/	/	/	/	/	/	/	/	/	/	/	/	/	/	/	/	/	/	/	/	/	/	/	/	/	/	/	/	/	/	/	/	/	/	/	/	/	/	/	/	/	/	/	/
K01372	/	/	/	/	/	/	/	/	/	/	/	/	/	/	/	Y	/	/	/	/	/	Y	/	/	/	/	/	/	/	/	/	/	Y	/	Y	/	Y	/	/	/	/	/	/	Y	/	/	/	/	/
K01373	/	/	/	/	/	/	/	/	/	/	/	/	/	/	/	/	/	/	/	/	/	/	/	/	/	/	/	/	/	/	/	/	/	/	/	/	/	/	/	/	/	/	/	/	/	/	/	/	/
K01374	/	/	/	/	/	/	/	/	/	/	/	/	/	/	/	/	/	/	/	/	/	/	/	/	/	/	/	/	/	/	/	/	/	/	/	/	/	/	/	/	/	/	/	/	/	/	/	/	/
K01375	/	/	/	/	/	/	/	/	/	/	/	/	/	/	/	/	/	/	/	/	/	/	/	/	/	/	/	/	/	/	/	/	/	/	/	/	/	/	/	/	/	/	/	/	/	/	/	/	/
K01376	/	/	/	/	/	/	/	/	/	/	/	/	/	/	/	/	/	/	/	/	/	/	/	/	/	/	/	/	/	/	/	/	/	/	/	/	/	/	/	/	/	/	/	/	/	/	/	/	/
K01377	/	/	/	/	/	/	/	/	/	/	/	/	/	/	/	/	/	/	/	/	/	/	/	/	/	/	/	/	/	/	/	/	/	/	/	/	/	/	/	/	/	/	/	/	/	/	/	/	/
K01378	/	/	/	/	/	/	/	/	/	/	/	/	/	/	/	/	/	/	/	/	/	/	/	/	/	/	/	/	/	/	/	/	/	/	/	/	/	/	/	/	/	/	/	/	/	/	/	/	/
K01379	/	/	/	/	/	/	/	/	/	/	/	/	/	/	/	/	/	/	/	/	/	/	/	/	/	/	/	/	/	/	/	/	/	/	/	/	/	/	/	/	/	/	/	/	/	/	/	/	/
K01380	/	/	/	/	/	/	/	/	/	/	/	/	/	/	/	/	/	/	/	/	/	/	/	/	/	/	/	/	/	/	/	/	/	/	/	/	/	/	/	/	/	/	/	/	/	/	/	/	/
K01381	/	/	/	/	/	/	/	/	/	/	/	/	/	/	/	/	/	/	/	/	/	/	/	/	/	/	/	/	/	/	/	/	/	/	/	/	/	/	/	/	/	/	/	/	/	/	/	/	/
K01382	/	/	/	/	/	/	/	/	/	/	/	/	/	/	/	/	/	/	/	/	/	/	/	/	/	/	/	/	/	/	/	/	/	/	/	/	/	/	/	/	/	/	/	/	/	/	/	/	/
K01383	/	/	/	/	/	/	/	/	/	/	/	/	/	/	/	/	/	/	/	/	/	/	/	/	/	/	/	/	/	/	/	/	/	/	/	/	/	/	/	/	/	/	/	/	/	/	/	/	/
K01384	/	/	/	/	/	/	/	/	/	/	/	/	/	/	/	/	/	/	/	/	/	/	/	/	/	/	/	/	/	/	/	/	/	/	/	/	/	/	/	/	/	/	/	/	/	/	/	/	/
K01385	/	/	/	/	/	/	/	/	/	/	/	/	/	/	/	/	/	/	/	/	/	/	/	/	/	/	/	/	/	/	/	/	/	/	/	/	/	/	/	/	/	/	/	/	/	/	/	/	/
K01386	/	/	/	/	/	/	/	/	/	/	/	/	/	/	/	/	/	/	/	/	/	/	/	/	/	/	/	/	/	/	/	/	/	/	/	/	/	/	/	/	/	/	/	/	/	/	/	/	/
K01387	/	/	/	/	/	/	/	/	/	/	/	/	/	/	/	/	/	/	/	/	/	/	/	/	/	/	/	/	/	/	/	/	/	/	/	/	/	/	/	/	/	/	/	/	/	/	/	/	/
K01388	/	/	/	/	/	/	/	/	/	/	/	/	/	/	/	/	/	/	/	/	/	/	/	/	/	/	/	/	/	/	/	/	/	/	/	/	/	/	/	/	/	/	/	/	/	/	/	/	/
K01389	/	/	/	/	/	/	/	/	/	/	/	/	/	/	/	/	/	/	/	/	/	/	/	/	/	/	/	/	/	/	/	/	/	/	/	/	/	/	/	/	/	/	/	/	/	/	/	/	/
K01390	/	/	/	/	/	/	/	/	/	/	/	/	/	/	/	/	/	/	/	/	/	/	/	/	/	/	/	/	/	/	/	/	/	/	/	/	/	/	/	/	/	/	/	/	/	/	/	/	/
K01392	/	/	/	/	/	/	/	/	/	/	/	/	/	/	/	/	/	/	/	/	/	/	/	/	/	/	/	/	/	/	/	/	/	/	/	/	/	/	/	/	/	/	/	/	/	/	/	/	/
K01393	/	/	/	/	/	/	/	/	/	/	/	/	/	/	/	/	/	/	/	/	/	/	/	/	/	/	/	/	/	/	/	/	/	/	/	/	/	/	/	/	/	/	/	/	/	/	/	/	/
K01394	/	/	/	/	/	/	/	/	/	/	/	/	/	/	/	/	/	/	/	/	/	/	/	/	/	/	/	/	/	/	/	/	/	/	/	/	/	/	/	/	/	/	/	/	/	/	/	/	/
K01395	/	/	/	/	/	/	/	/	/	/	/	/	/	/	/	/	/	/	/	/	/	/	/	/	/	/	/	/	/	/	/	/	/	/	/	/	/	/	/	/	/	/	/	/	/	/	/	/	/
K01396	/	/	/	/	/	/	/	/	/	/	/	/	/	/	/	/	/	/	/	/	/	/	/	/	/	/	/	/	/	/	/	/	/	/	/	/	/	/	/	/	/	/	/	/	/	/	/	/	/
K01397	/	/	/	/	/	/	/	/	/	/	/	/	/	/	/	/	/	/	/	/	/	/	/	/	/	/	/	/	/	/	/	/	/	/	/	/	/	/	/	/	/	/	/	/	/	/	/	/	/
K01398	/	/	/	/	/	/	/	/	/	/	/	/	/	/	/	/	/	/	/	/	/	/	/	/	/	/	/	/	/	/	/	/	/	/	/	/	/	/	/	/	/	/	/	/	/	/	/	/	/
K01399	/	/	/	/	/	/	/	/	/	/	/	/	/	/	/	/	/	/	/	/	/	/	/	/	/	/	/	/	/	/	/	/	/	/	/	/	/	/	/	/	/	/	/	/	/	/	/	/	/
K01400	/	/	/	/	/	/	/	/	/	/	/	/	/	/	/	/	/	/	/	/	/	/	/	/	/	/	/	/	/	/	/	/	/	/	/	/	/	/	/	/	/	/	/	/	/	/	/	/	/
K01401	/	/	/	/	/	/	/	/	/	/	/	/	/	/	/	/	/	/	/	/	/	/	/	/	/	/	/	/	/	/	/	/	/	/	/	/	/	/	/	/	/	/	/	/	/	/	/	/	/
K01402	/	/	/	/	/	/	/	/	/	/	/	/	/	/	/	/	/	/	/	/	/	/	/	/	/	/	/	/	/	/	/	/	/	/	/	/	/	/	/	/	/	/	/	/	/	/	/	/	/
K01403	/	/	/	/	/	/	/	/	/	/	/	/	/	/	/	/	/	/	/	/	/	/	/	/	/	/	/	/	/	/	/	/	/	/	/	/	/	/	/	/	/	/	/	/	/	/	/	/	/
K01404	/	/	/	/	/	/	/	/	/	/	/	/	/	/	/	/	/	/	/	/	/	/	/	/	/	/	/	/	/	/	/	/	/	/	/	/	/	/	/	/	/	/	/	/	/	/	/	/	/
K01405	/	/	/	/	/	/	/	/	/	/	/	/	/	/	/	/	/	/	/	/	/	/	/	/	/	/	/	/	/	/	/	/	/	/	/	/	/	/	/	/	/	/	/	/	/	/	/	/	/
K01406	/	/	/	/	/	/	/	/	/	/	/	/	/	/	/	/	/	/	/	/	/	/	/	/	/	/	/	/	/	/	/	/	/	/	/	/	/	/	/	/	/	/	/	/	/	/	/	/	/
K01407	/	/	/	/	/	/	/	/	/	/	/	/	/	/	/	/	/	/	/	/	/	/	/	/	/	/	/	/	/	/	/	/	/	/	/	/	/	/	/	/	/	/	/	/	/	/	/	/	/
K01408	Y	/	/	/	/	/	Y	/	/	/	/	/	/	/	Y	/	/	/	/	/	/	/	/	/	/	Y	/	Y	/	/	/	/	/	Y	/	/	/	/	/	/	/	/	/	/	/	/	/	/	/
K01409	Y	Y	Y	Y	Y	Y	Y	Y	/	Y	Y	Y	Y	Y	/	/	Y	Y	Y	Y	Y	Y	Y	Y	/	Y	Y	Y	Y	/	Y	Y	Y	Y	/	Y	Y	Y	Y	Y	Y	Y	Y	Y	Y	Y	Y	/	Y
K01410	/	/	/	/	/	/	/	/	/	/	/	/	/	/	/	/	/	/	/	/	/	/	/	/	/	/	/	/	/	/	/	/	/	/	/	/	/	/	/	/	/	/	/	/	/	/	/	/	/
K01411	/	/	/	/	/	/	/	/	/	/	/	/	/	/	/	/	/	/	/	/	/	/	/	/	/	/	/	/	/	/	/	/	/	/	/	/	/	/	/	/	/	/	/	/	/	/	/	/	/
K01412	/	/	/	/	/	/	/	/	/	/	/	/	/	/	/	/	/	/	/	/	/	/	/	/	/	/	/	/	/	/	/	/	/	/	/	/	/	/	/	/	/	/	/	/	/	/	/	/	/
K01413	/	/	/	/	/	/	/	/	/	/	/	/	/	/	/	/	/	/	/	/	/	/	/	/	/	/	/	/	/	/	/	/	/	/	/	/	/	/	/	/	/	/	/	/	/	/	/	/	/
K01414	/	/	/	/	/	/	/	/	/	/	/	/	/	/	/	/	/	/	/	/	/	/	/	/	/	/	/	/	/	/	/	/	/	/	/	/	/	/	/	/	/	/	/	/	/	/	/	/	/
K01415	/	/	/	/	/	/	/	/	/	/	/	/	/	/	/	/	/	/	/	/	/	/	/	/	/	/	/	/	/	/	/	/	/	/	/	/	/	/	/	/	/	/	/	/	/	/	/	/	/
K01416	/	/	/	/	/	/	/	/	/	/	/	/	/	/	/	/	/	/	/	/	/	/	/	/	/	/	/	/	/	/	/	/	/	/	/	/	/	/	/	/	/	/	/	/	/	/	/	/	/
K01417	/	/	/	/	/	/	/	/	/	/	/	/	/	/	/	/	/	/	/	/	/	/	/	/	/	/	/	/	/	/	/	/	/	/	/	/	/	/	/	/	/	/	/	/	/	/	/	/	/
K01419	/	/	Y	/	/	/	Y	/	Y	Y	/	Y	Y	Y	Y	/	Y	/	Y	Y	/	/	Y	/	Y	Y	Y	Y	Y	Y	/	Y	/	/	Y	Y	/	/	/	Y	Y	Y	/	/	Y	Y	/	Y	/
K01420	/	/	/	/	/	/	/	/	/	/	/	/	/	/	/	Y	/	/	/	/	/	/	/	/	/	/	/	/	/	/	/	/	/	Y	/	/	/	/	/	/	/	/	/	/	/	/	Y	/	/
K01421	/	/	/	/	/	/	/	Y	/	/	/	/	/	/	/	/	/	/	/	/	Y	/	/	/	/	/	/	/	/	/	/	/	/	/	/	/	/	/	/	/	/	/	/	/	/	/	/	/	/
K01422	/	/	/	/	/	/	/	/	/	/	/	/	/	/	/	/	/	/	/	/	/	/	/	/	/	/	/	/	/	/	/	/	/	/	/	/	/	/	/	/	/	/	/	/	/	/	/	/	/
K01424	Y	Y	/	/	/	Y	Y	/	Y	Y	/	/	Y	Y	/	/	/	Y	Y	Y	Y	/	/	Y	/	/	/	/	/	Y	/	/	/	/	Y	Y	Y	Y	/	Y	/	Y	Y	Y	/	Y	Y	/	/
K01425	/	/	/	/	/	/	/	Y	/	Y	/	/	/	/	/	/	/	/	/	Y	/	/	/	/	/	/	/	/	Y	/	/	/	/	/	/	/	Y	/	/	/	/	/	/	Y	/	/	Y	/	/
K01426	Y	Y	/	/	/	/	/	Y	/	Y	Y	/	/	/	/	Y	/	/	Y	/	/	/	/	Y	/	Y	/	/	Y	Y	/	/	/	/	/	/	/	/	/	/	/	Y	Y	Y	Y	Y	/	/	/
K01427	/	/	/	/	/	/	/	/	/	/	/	/	/	/	/	/	/	/	/	/	/	/	/	/	/	/	/	/	/	/	/	/	/	/	/	/	/	/	/	/	/	/	/	/	/	/	/	/	/
K01428	/	/	/	/	/	/	/	/	/	/	/	/	/	/	/	/	/	/	/	/	/	/	/	/	/	/	/	/	/	/	/	/	/	/	/	/	/	/	/	/	/	/	/	/	Y	/	/	/	/
K01429	/	/	/	/	/	/	/	/	/	/	/	/	/	/	/	/	/	/	/	/	/	/	/	/	/	/	/	/	/	/	/	/	/	/	/	/	/	/	/	/	/	/	/	/	Y	/	/	/	/
K01430	/	/	/	/	/	/	/	/	/	/	/	/	/	/	/	/	/	/	/	/	/	/	/	/	/	/	/	/	/	/	/	/	/	/	/	/	/	/	/	/	/	/	/	/	Y	/	/	/	/
K01431	/	/	/	/	/	/	/	/	Y	/	/	Y	/	/	/	/	/	/	/	/	/	/	/	/	/	/	/	Y	/	/	/	/	/	/	/	/	/	/	/	/	/	/	/	/	Y	/	/	/	/
K01432	/	/	/	/	/	/	/	/	/	/	/	/	/	/	/	/	/	/	/	/	/	/	/	/	/	/	/	/	/	/	/	/	/	/	/	/	/	/	/	/	/	/	/	/	/	/	/	/	/
K01433	/	/	/	/	/	/	/	Y	/	/	/	/	/	/	/	/	/	/	/	/	Y	Y	/	/	/	/	/	/	/	/	/	/	/	/	/	/	/	/	/	Y	/	/	Y	/	/	/	/	/	/
K01434	/	/	/	/	/	/	/	/	/	/	/	/	/	/	/	/	/	/	/	/	/	/	/	Y	/	/	/	/	/	/	/	/	/	/	/	/	/	/	/	/	/	/	Y	/	/	/	/	/	/
K01435	/	/	/	/	/	/	/	/	/	/	/	/	/	/	/	/	/	/	/	/	/	/	/	/	/	/	/	/	/	/	/	/	/	/	/	/	/	/	/	/	/	/	/	/	/	/	/	/	/
K01436	Y	/	/	/	/	Y	Y	/	/	Y	/	/	Y	/	/	Y	/	/	/	Y	Y	Y	/	Y	/	Y	/	/	Y	Y	/	/	Y	/	Y	Y	Y	/	/	/	Y	/	Y	/	/	Y	Y	/	/
K01437	/	/	/	/	/	/	/	/	/	/	/	/	/	/	/	/	/	/	/	/	/	/	/	/	/	/	/	/	/	/	/	/	/	/	/	/	/	/	/	/	/	/	/	/	/	/	/	/	/
K01438	/	/	Y	/	/	/	/	/	/	Y	/	Y	Y	Y	/	/	Y	/	Y	/	/	Y	Y	Y	/	/	/	/	Y	/	/	/	/	/	/	/	Y	/	/	/	/	/	/	Y	Y	/	/	/	/
K01439	Y	Y	/	/	/	Y	Y	Y	Y	/	/	/	Y	/	/	Y	/	/	/	Y	/	/	/	Y	/	Y	/	Y	/	/	/	/	/	/	Y	Y	/	/	Y	Y	/	Y	Y	/	/	Y	Y	/	/
K01440	/	/	/	/	/	/	/	/	/	/	/	/	/	/	/	/	/	/	/	/	/	/	/	/	/	/	/	/	/	/	/	/	/	/	/	/	/	/	/	/	/	/	/	/	/	/	/	/	/
K01441	/	/	/	/	/	/	/	/	/	/	/	/	/	/	/	/	/	/	/	/	/	/	/	/	/	/	/	/	/	/	/	/	/	/	/	/	/	/	/	/	/	/	/	/	/	/	/	/	/
K01442	/	/	/	/	/	/	/	/	Y	/	/	/	/	/	/	/	/	/	/	Y	/	/	/	/	/	/	/	/	/	/	/	/	/	/	/	/	/	/	/	/	/	/	/	/	/	/	Y	/	/
K01443	/	Y	Y	/	/	/	/	Y	/	Y	/	Y	/	/	/	Y	Y	/	/	/	Y	Y	Y	Y	/	Y	Y	/	Y	/	/	/	Y	Y	Y	Y	/	/	Y	/	Y	/	Y	/	Y	/	/	Y	/
K01444	/	/	/	/	/	/	/	/	Y	Y	/	/	/	/	/	Y	/	/	/	/	/	/	/	/	/	/	/	/	/	/	/	/	Y	/	/	/	/	/	/	/	/	/	/	/	/	/	/	Y	/
K01446	/	/	/	/	/	/	/	/	/	/	/	/	/	/	/	/	/	/	/	/	/	/	/	/	/	/	/	/	/	/	/	/	/	/	/	/	/	/	/	/	/	/	/	/	/	/	/	/	/
K01447	/	/	/	/	/	/	/	/	/	Y	/	/	/	/	/	/	/	/	/	/	/	/	/	/	/	/	/	/	/	/	/	/	/	/	/	/	/	/	/	/	/	/	/	/	/	/	/	/	/
K01448	Y	Y	/	/	Y	Y	Y	/	Y	Y	/	/	Y	/	Y	/	/	/	/	Y	/	Y	Y	Y	Y	Y	/	Y	Y	Y	/	Y	Y	Y	/	/	Y	Y	/	Y	/	Y	/	Y	/	/	Y	/	/
K01449	Y	/	/	/	/	/	Y	/	/	Y	/	/	/	/	/	/	/	/	/	/	/	/	/	/	/	Y	/	/	Y	/	/	Y	/	Y	/	/	/	/	/	/	/	/	/	/	/	/	/	/	/
K01450	/	/	/	/	/	/	/	/	/	/	/	/	/	/	/	/	/	/	/	/	/	/	/	/	/	/	/	/	/	/	/	/	/	/	/	/	/	/	/	/	/	/	/	/	/	/	/	/	/
K01451	/	/	/	/	/	/	/	/	/	/	/	/	/	/	/	/	/	/	/	Y	/	/	/	/	/	/	/	/	/	/	/	/	/	/	/	/	/	/	/	/	/	/	/	Y	/	/	/	/	Y
K01452	/	/	/	/	/	/	/	/	/	/	/	/	/	/	/	/	/	/	/	/	/	/	/	/	/	/	/	/	/	/	/	/	/	/	/	/	/	/	/	/	/	/	/	/	/	/	/	/	/
K01453	/	/	/	/	/	/	/	/	/	/	/	/	/	/	/	/	/	/	/	/	/	/	/	/	/	/	/	/	/	/	/	/	/	/	/	/	/	/	/	/	/	/	/	/	/	/	/	/	/
K01455	/	/	/	/	/	/	/	/	/	/	/	/	/	/	/	/	/	/	/	/	/	/	/	/	/	/	/	/	/	Y	/	/	/	/	/	/	/	/	/	/	/	/	/	/	/	/	/	/	/
K01456	/	/	/	/	/	/	/	/	/	/	/	/	/	/	/	/	/	/	/	/	/	/	/	/	/	/	/	/	/	/	/	/	/	/	/	/	/	/	/	/	/	/	/	/	/	/	/	/	/
K01457	/	/	/	/	/	/	/	/	/	/	/	/	/	/	/	/	/	/	/	/	/	/	/	/	/	/	/	/	/	/	/	/	/	/	/	/	/	/	/	/	/	/	/	/	/	/	/	/	/
K01458	/	/	/	/	/	/	/	/	/	/	/	/	/	/	/	/	/	/	/	/	/	/	/	/	/	/	/	/	/	/	/	/	/	/	/	/	/	/	/	/	/	/	/	/	/	/	/	/	/
K01459	/	/	/	/	/	/	/	/	/	/	/	/	/	/	/	/	/	/	/	/	/	/	/	/	/	/	/	/	/	/	/	/	/	/	/	/	/	/	/	/	/	/	/	/	/	/	/	/	/
K01460	/	/	/	/	/	/	/	/	/	/	/	/	/	/	/	/	/	/	/	/	/	/	/	/	/	/	/	/	/	/	/	/	/	/	/	/	/	/	/	/	/	/	/	/	/	/	/	/	/
K01461	/	/	/	/	/	/	/	/	/	/	/	/	/	/	/	/	/	/	/	/	/	/	/	/	/	/	/	/	/	/	/	/	/	/	/	/	/	/	/	/	/	/	/	/	/	/	/	/	/
K01462	Y	Y	Y	Y	/	Y	Y	Y	/	Y	Y	Y	Y	/	Y	Y	/	Y	Y	Y	Y	Y	Y	/	Y	Y	Y	Y	Y	Y	/	Y	Y	Y	Y	Y	Y	Y	Y	Y	Y	Y	Y	Y	Y	Y	Y	Y	Y
K01464	Y	/	/	/	/	Y	/	/	/	/	/	/	/	/	/	/	/	/	/	/	Y	/	/	Y	Y	/	/	/	/	Y	/	/	/	/	/	/	/	/	Y	/	/	Y	Y	/	/	Y	Y	/	/
K01465	Y	Y	Y	Y	/	Y	/	Y	/	Y	/	Y	Y	Y	Y	Y	Y	Y	Y	Y	Y	Y	Y	Y	Y	Y	Y	Y	Y	Y	Y	Y	/	Y	/	Y	Y	Y	/	Y	Y	Y	Y	Y	Y	Y	Y	Y	/
K01466	/	/	/	/	/	/	/	/	/	/	/	/	/	/	/	/	/	/	/	/	/	/	/	/	/	/	/	Y	/	Y	/	/	/	/	/	/	/	/	/	/	/	/	/	/	/	/	/	/	/
K01467	/	/	/	/	/	/	/	/	/	/	/	/	/	/	/	/	/	/	/	/	/	Y	/	/	/	/	Y	/	/	/	/	/	/	/	/	/	/	/	/	/	/	/	Y	/	/	/	/	/	/
K01468	Y	Y	/	Y	Y	Y	Y	/	Y	Y	/	/	Y	/	/	Y	/	Y	/	Y	/	/	/	Y	Y	Y	/	/	Y	/	/	Y	Y	Y	/	Y	Y	Y	Y	/	/	Y	/	Y	/	Y	Y	/	Y
K01469	/	/	/	/	/	/	/	/	/	/	/	/	/	/	/	/	/	/	/	/	/	/	/	/	/	/	/	/	/	/	/	/	/	/	/	/	/	/	/	/	/	/	/	/	/	/	/	/	/
K01470	/	Y	/	/	/	/	/	/	Y	Y	Y	Y	Y	Y	/	Y	Y	Y	Y	Y	/	Y	/	Y	/	Y	Y	/	/	/	Y	/	Y	/	Y	/	Y	/	Y	/	/	/	/	/	Y	/	/	Y	Y
K01471	/	/	/	/	/	/	/	/	/	/	/	/	/	/	/	/	/	/	/	/	/	/	/	/	/	/	/	/	/	/	/	/	/	/	/	/	/	/	/	/	/	/	/	/	/	/	/	/	/
K01473	/	/	/	/	/	/	/	/	Y	/	/	/	Y	/	/	/	/	/	/	/	/	/	/	/	/	/	/	/	/	/	/	Y	/	/	/	/	/	/	/	/	/	/	/	/	/	/	/	/	/
K01474	/	/	/	/	/	/	/	/	/	/	/	/	Y	/	/	/	Y	/	/	/	/	/	/	/	/	/	/	/	/	/	/	Y	/	/	/	/	/	/	/	Y	/	/	/	/	/	/	/	/	/
K01476	/	/	/	/	/	/	/	/	/	/	/	/	/	/	/	/	/	/	/	/	/	/	/	/	/	/	/	/	/	/	/	/	/	/	/	/	/	/	/	/	/	/	/	/	/	/	/	/	Y
K01477	/	/	/	/	/	/	/	/	/	/	/	/	/	/	/	/	/	/	/	/	/	/	/	/	/	/	/	/	/	/	/	/	/	/	/	/	/	/	/	/	/	/	/	/	/	/	/	/	/
K01478	/	/	/	/	/	/	Y	/	/	/	/	/	/	/	/	/	/	/	/	Y	/	/	/	/	/	/	/	/	/	Y	/	/	/	/	/	Y	/	/	Y	/	/	/	Y	Y	/	/	Y	/	/
K01479	/	/	/	/	/	/	/	/	/	/	/	/	Y	/	/	/	/	/	/	/	/	Y	/	/	/	/	/	/	/	/	/	/	/	/	/	/	/	/	/	/	/	/	/	/	/	/	/	/	/
K01480	/	/	/	/	Y	/	Y	/	/	Y	/	/	/	/	Y	Y	/	/	/	Y	/	Y	/	/	/	/	/	Y	/	Y	Y	Y	/	Y	/	/	/	/	Y	/	/	/	/	Y	/	/	Y	/	Y
K01481	/	/	/	/	/	/	/	/	/	/	/	/	/	/	/	/	/	/	/	/	/	/	/	/	/	/	/	/	/	/	/	/	/	/	/	/	/	/	/	/	/	/	/	/	/	/	/	/	/
K01482	/	/	/	/	/	/	/	/	Y	/	/	/	/	/	/	/	/	/	/	/	/	/	/	/	/	/	/	/	/	/	/	/	/	/	/	/	/	/	/	/	/	/	/	/	/	Y	/	/	/
K01483	/	/	/	/	/	/	/	/	/	/	/	/	/	/	/	/	/	/	/	/	/	/	/	/	/	/	/	/	Y	/	/	/	/	/	Y	/	/	/	/	/	/	/	/	/	Y	/	/	/	/
K01484	/	/	/	/	/	/	/	/	/	/	/	/	/	/	/	/	/	/	/	/	/	/	/	/	/	/	/	/	/	/	/	/	/	/	/	/	/	/	/	/	/	/	/	/	/	/	/	/	/
K01485	/	/	/	/	/	/	/	/	/	/	/	/	/	/	/	/	/	/	/	/	/	/	/	/	/	/	/	/	/	/	Y	/	/	/	/	/	/	/	/	/	/	/	/	/	/	/	/	/	/
K01486	Y	/	/	/	/	Y	Y	/	/	/	/	/	Y	/	Y	/	/	/	/	Y	/	/	/	Y	/	/	/	Y	/	Y	Y	Y	Y	/	/	/	/	/	Y	Y	/	/	/	/	/	/	/	/	/
K01487	/	/	/	/	/	Y	/	/	/	/	/	/	/	/	Y	/	/	/	/	/	/	/	/	/	/	/	/	/	/	/	Y	/	/	/	/	/	/	Y	Y	Y	/	Y	Y	/	/	/	/	/	/
K01488	/	/	/	/	/	/	/	/	Y	/	/	/	/	/	/	/	/	/	/	/	Y	/	/	/	Y	/	/	/	/	/	/	/	/	/	/	/	/	Y	/	/	/	Y	Y	/	/	/	/	/	/
K01489	Y	Y	Y	Y	Y	Y	Y	Y	Y	Y	/	Y	/	/	Y	Y	/	Y	/	Y	Y	Y	/	/	Y	Y	Y	Y	Y	Y	Y	Y	Y	Y	Y	Y	Y	Y	Y	/	/	Y	Y	Y	Y	Y	Y	/	Y
K01490	/	/	/	/	/	/	/	/	/	/	/	/	/	/	/	/	/	/	/	/	/	/	/	/	/	/	/	/	/	/	/	/	/	/	/	/	/	/	/	/	/	/	/	/	/	/	/	/	/
K01491	Y	Y	Y	Y	Y	Y	Y	Y	Y	Y	/	Y	/	Y	/	/	/	Y	Y	Y	Y	Y	Y	Y	Y	Y	Y	Y	Y	Y	Y	Y	Y	Y	Y	Y	Y	Y	Y	Y	Y	Y	Y	Y	Y	Y	Y	Y	Y
K01492	/	/	/	/	/	/	/	/	/	/	/	/	/	/	/	/	/	/	/	/	/	/	/	/	/	/	/	/	/	/	/	/	/	/	/	/	/	/	/	/	/	/	/	/	/	/	/	/	/
K01493	Y	Y	Y	Y	Y	Y	Y	Y	/	Y	/	Y	Y	Y	Y	Y	Y	Y	Y	Y	/	Y	Y	Y	Y	Y	/	Y	Y	Y	Y	Y	Y	Y	Y	Y	Y	Y	Y	Y	Y	Y	Y	Y	Y	Y	Y	Y	Y
K01494	/	/	/	/	Y	/	/	/	Y	/	/	/	/	/	/	/	/	/	/	/	Y	/	/	/	/	Y	Y	/	/	/	/	/	/	Y	/	/	/	/	/	/	/	/	Y	/	/	Y	/	/	Y
K01495	/	/	/	/	/	Y	Y	Y	/	Y	/	Y	/	Y	/	Y	/	Y	/	/	/	Y	Y	Y	/	/	Y	Y	/	/	/	Y	Y	/	/	/	Y	/	/	/	Y	/	Y	Y	/	Y	/	Y	Y
K01496	/	/	/	/	/	/	/	/	/	Y	/	Y	Y	Y	Y	/	Y	/	Y	/	/	/	Y	/	/	/	Y	/	/	/	Y	Y	/	Y	Y	/	/	/	/	Y	Y	/	Y	/	/	/	/	Y	/
K01497	/	/	/	/	/	/	/	/	/	/	/	/	/	/	/	/	/	/	/	/	/	/	/	/	/	/	/	/	/	/	/	/	/	/	/	/	/	/	/	/	/	/	/	/	/	/	/	/	/
K01498	/	/	/	/	/	/	/	/	/	/	/	/	/	/	/	/	/	/	/	/	/	/	/	/	/	/	/	/	/	/	/	/	/	/	/	/	/	/	/	/	/	/	/	/	/	/	/	/	/
K01499	/	/	/	/	/	/	/	/	/	/	/	/	/	/	/	/	/	/	/	Y	/	/	/	/	/	/	/	/	/	/	Y	/	/	/	/	/	/	/	/	/	/	/	/	/	/	/	/	/	/
K01501	/	/	/	/	/	/	Y	/	/	Y	/	/	/	/	/	/	/	Y	/	Y	/	/	Y	/	/	/	/	/	/	Y	/	/	/	/	/	/	/	/	/	/	/	/	/	/	/	/	Y	/	/
K01502	/	/	/	/	/	/	/	/	/	/	/	/	/	/	Y	/	/	/	/	/	/	/	/	/	/	/	/	/	/	/	/	/	/	/	/	/	/	/	/	/	/	/	/	/	/	/	/	/	/
K01505	/	/	/	/	/	/	/	/	/	/	/	/	/	/	/	/	/	/	/	/	/	/	/	/	/	/	/	/	/	/	/	/	/	/	/	/	/	/	/	/	/	/	/	/	/	/	/	/	/
K01507	/	/	Y	/	/	/	/	Y	/	/	/	Y	/	/	/	Y	/	/	/	/	Y	/	/	Y	/	Y	/	/	Y	/	/	/	/	/	/	Y	/	/	Y	/	/	/	Y	Y	/	/	/	/	/
K01509	/	/	/	/	/	/	/	/	/	/	/	/	/	/	/	/	/	/	/	/	/	/	/	/	/	/	/	/	/	/	/	/	/	/	/	/	/	/	/	/	/	/	/	/	/	/	/	/	/
K01510	/	/	/	/	/	/	/	/	/	/	/	/	/	/	/	/	/	/	/	/	/	/	/	/	/	/	/	/	/	/	/	/	/	/	/	/	/	/	/	/	/	/	/	/	/	/	/	/	/
K01511	/	/	/	/	/	/	/	/	/	/	/	/	/	/	/	/	/	/	/	/	/	/	/	/	/	/	/	/	/	/	/	/	/	/	/	/	/	/	/	/	/	/	/	/	/	/	/	/	/
K01512	/	Y	Y	/	/	Y	/	Y	Y	Y	Y	Y	Y	Y	/	/	Y	Y	Y	Y	Y	Y	/	Y	Y	/	Y	/	/	/	Y	Y	Y	/	Y	/	/	Y	/	Y	Y	Y	Y	/	Y	/	/	/	/
K01513	/	/	/	/	/	/	/	/	/	/	/	/	/	/	/	/	/	/	/	/	/	/	/	/	/	/	/	/	/	/	/	/	/	/	/	/	/	/	/	/	/	/	/	/	/	/	/	/	/
K01514	/	/	/	/	/	/	/	/	/	/	/	/	/	/	/	/	/	/	/	/	/	/	/	/	/	/	/	/	/	/	/	/	/	/	/	/	/	/	/	/	/	/	/	/	/	/	/	/	/
K01515	Y	Y	Y	Y	Y	Y	Y	Y	/	/	Y	Y	Y	Y	Y	Y	Y	/	Y	Y	Y	/	Y	Y	/	Y	Y	Y	Y	Y	/	Y	/	Y	Y	Y	/	/	Y	/	Y	/	Y	/	Y	/	Y	Y	Y
K01517	/	/	/	/	/	/	/	/	/	/	/	/	/	Y	/	/	/	/	/	/	/	/	/	/	/	/	/	/	/	/	/	/	/	/	/	/	/	/	/	/	/	/	/	/	/	/	/	/	/
K01518	/	/	/	/	/	/	/	/	/	/	/	/	/	/	/	/	/	/	/	/	/	/	/	/	/	/	/	/	/	/	/	/	/	/	/	/	/	/	/	/	/	/	/	/	/	/	/	/	/
K01519	/	/	/	/	/	/	/	/	/	/	/	/	/	/	/	/	/	/	/	/	/	/	/	/	/	/	/	/	/	/	/	/	/	/	/	/	/	/	/	/	/	/	/	/	/	/	/	/	/
K01520	/	/	Y	Y	Y	Y	Y	/	Y	Y	Y	/	/	Y	Y	/	Y	Y	Y	Y	Y	Y	/	/	Y	/	/	Y	/	Y	Y	Y	Y	Y	Y	/	Y	Y	Y	Y	Y	Y	/	Y	Y	/	Y	Y	Y
K01521	/	/	/	/	/	/	/	/	/	/	/	/	/	/	/	/	/	/	/	/	/	/	/	/	/	/	/	/	/	/	/	/	/	/	/	/	/	/	/	/	/	/	/	/	/	/	/	/	/
K01522	/	/	/	/	/	/	/	/	/	/	/	/	/	/	/	/	/	/	/	/	/	/	/	/	/	/	/	/	/	/	/	/	/	/	/	/	/	/	/	/	/	/	/	/	/	/	/	/	/
K01523	/	Y	/	/	/	/	/	Y	/	/	/	/	/	/	/	Y	/	/	/	/	Y	/	/	Y	/	/	Y	/	/	/	/	/	/	/	/	/	/	/	/	/	/	/	Y	/	/	/	/	/	/
K01524	/	/	/	/	Y	/	Y	/	/	/	/	Y	/	/	Y	Y	/	/	/	Y	/	/	/	/	Y	Y	Y	/	Y	Y	/	Y	/	Y	Y	Y	/	Y	/	/	/	/	/	Y	/	/	Y	Y	Y
K01525	/	/	/	/	/	/	/	/	/	/	/	/	/	/	/	/	/	/	/	/	/	/	/	/	/	/	/	/	/	/	/	/	/	/	/	/	/	/	/	/	/	/	/	/	/	/	/	/	/
K01526	/	/	/	/	/	/	/	/	/	/	/	/	/	/	/	/	/	/	/	/	/	/	/	/	/	/	/	/	/	/	/	/	/	/	/	/	/	/	/	/	/	/	/	/	/	/	/	/	/
K01527	/	/	/	/	/	/	/	/	/	/	/	/	/	/	/	/	/	/	/	/	/	/	/	/	/	/	/	/	/	/	/	/	/	/	/	/	/	/	/	/	/	/	/	/	/	/	/	/	/
K01528	/	/	/	/	/	/	/	/	/	/	/	/	/	/	/	/	/	/	/	/	/	/	/	/	/	/	/	/	/	/	/	/	/	/	/	/	/	/	/	/	/	/	/	/	/	/	/	/	/
K01530	/	/	/	/	/	/	/	/	/	/	/	/	/	/	/	/	/	/	/	/	/	/	/	/	/	/	/	/	/	/	/	/	/	/	/	/	/	/	/	/	/	/	/	/	/	/	/	/	/
K01531	/	/	/	/	/	/	/	/	/	/	Y	/	/	/	/	/	/	/	/	/	/	/	/	/	/	/	/	/	/	/	/	/	/	/	/	/	/	/	/	Y	/	/	/	/	/	/	/	/	/
K01533	/	/	Y	/	/	/	/	Y	Y	/	/	Y	Y	/	/	Y	/	/	/	/	/	Y	/	Y	/	/	/	/	/	/	/	/	Y	/	/	/	Y	/	/	Y	/	/	/	Y	/	/	/	/	/
K01534	Y	/	Y	Y	/	/	Y	/	/	/	/	Y	Y	/	Y	/	/	/	Y	/	Y	Y	/	Y	/	Y	Y	Y	Y	Y	/	Y	/	Y	/	Y	/	Y	Y	Y	/	Y	/	/	/	/	Y	/	Y
K01535	/	/	/	/	/	/	/	/	/	/	/	/	/	/	/	/	/	/	/	/	/	/	/	/	/	/	/	/	/	/	/	/	/	/	/	/	/	/	/	/	/	/	/	/	/	/	/	/	/
K01536	/	/	/	/	/	/	/	/	/	/	/	/	/	/	/	/	/	/	/	/	/	/	/	/	/	/	/	/	/	/	/	/	/	/	/	/	/	/	/	/	/	/	/	/	/	/	/	/	/
K01537	Y	Y	Y	Y	Y	Y	Y	/	/	Y	/	Y	Y	/	Y	/	Y	Y	Y	Y	Y	Y	Y	Y	Y	Y	Y	Y	Y	/	Y	Y	Y	Y	/	Y	Y	/	/	Y	Y	/	Y	Y	Y	/	/	/	Y
K01538	/	/	/	/	/	/	/	/	/	/	/	/	/	/	/	/	/	/	/	/	/	/	/	/	/	/	/	/	/	/	/	/	/	/	/	/	/	/	/	/	/	/	/	/	/	/	/	/	/
K01539	/	/	/	/	/	/	/	/	/	/	/	/	/	/	/	/	/	/	/	/	/	/	Y	/	/	/	/	/	/	/	/	/	/	/	/	/	/	/	/	/	/	/	/	/	/	/	/	/	/
K01540	/	/	/	/	/	/	/	/	/	/	/	/	/	/	/	/	/	/	/	/	/	/	/	/	/	/	/	/	/	/	/	/	/	/	/	/	/	/	/	/	/	/	/	/	/	/	/	/	/
K01541	/	/	/	/	/	/	/	/	/	/	/	/	/	/	/	/	/	/	/	/	/	/	/	/	/	/	/	/	/	/	/	/	/	/	/	/	/	/	/	/	/	/	/	/	/	/	/	/	/
K01542	/	/	/	/	/	/	/	/	/	/	/	/	/	/	/	/	/	/	/	/	/	/	/	/	/	/	/	/	/	/	/	/	/	/	/	/	/	/	/	/	/	/	/	/	/	/	/	/	/
K01543	/	/	/	/	/	/	/	/	/	/	/	/	/	/	/	/	/	/	/	/	/	/	/	/	/	/	/	/	/	/	/	/	/	/	/	/	/	/	/	/	/	/	/	/	/	/	/	/	/
K01544	/	/	/	/	/	/	/	/	/	/	/	/	/	/	/	/	/	/	/	/	/	/	/	/	/	/	/	/	/	/	/	/	/	/	/	/	/	/	/	/	/	/	/	/	/	/	/	/	/
K01545	/	/	/	/	/	/	/	/	/	/	/	/	/	/	/	/	/	/	/	/	/	/	/	/	/	/	/	/	/	/	/	/	/	/	/	/	/	/	/	/	/	/	/	/	/	/	/	/	/
K01546	/	/	/	/	/	Y	/	/	/	/	/	/	/	Y	/	/	/	/	/	/	/	/	/	/	/	/	Y	/	/	/	/	/	/	/	/	/	/	/	/	Y	/	/	/	/	/	/	/	Y	/
K01547	/	/	/	/	/	Y	/	/	/	/	/	/	/	Y	/	/	/	/	/	/	/	/	/	/	/	/	Y	/	/	/	/	/	/	/	/	/	/	/	/	Y	/	/	/	/	/	Y	/	Y	/
K01548	/	/	/	/	/	Y	/	/	/	/	/	/	/	Y	/	/	/	/	/	/	/	/	/	/	/	/	Y	/	/	/	/	/	/	/	/	/	/	/	/	Y	/	/	/	/	/	Y	/	/	/
K01549	/	/	/	/	/	/	/	/	/	/	/	/	/	/	/	/	/	/	/	/	/	/	/	/	/	/	/	/	/	/	/	/	/	/	/	/	/	/	/	/	/	/	/	/	/	/	/	/	/
K01551	/	/	/	/	/	/	Y	Y	/	/	/	/	Y	/	/	/	/	/	/	/	/	/	Y	/	/	/	/	/	/	Y	/	/	/	/	/	/	/	/	/	/	/	/	/	/	/	/	/	/	/
K01555	/	/	/	/	/	/	/	/	/	/	/	/	/	/	/	/	/	/	/	/	/	/	/	/	/	/	/	/	/	/	/	/	/	/	/	/	/	/	/	/	/	/	/	/	/	/	/	/	/
K01556	/	/	/	/	/	/	Y	/	Y	/	/	/	/	/	/	/	/	/	/	/	/	/	/	/	/	/	/	/	/	Y	/	/	/	/	/	/	/	/	/	/	/	/	/	/	/	/	/	/	/
K01557	/	/	/	/	/	/	/	/	/	/	/	/	/	/	/	/	/	/	/	/	/	Y	/	/	/	/	/	/	/	/	/	/	Y	/	/	/	Y	/	/	/	/	/	/	/	/	/	/	/	/
K01558	/	/	/	/	/	/	/	/	/	/	/	/	/	/	/	/	/	/	/	/	/	/	/	/	/	/	/	/	/	/	/	/	/	/	/	/	/	/	/	/	/	/	/	/	/	/	/	/	/
K01560	/	/	/	/	/	/	/	/	/	Y	/	/	/	/	/	Y	/	/	/	/	/	/	/	/	/	/	/	/	/	/	/	/	/	/	/	/	Y	/	/	/	/	/	Y	/	/	/	/	/	Y
K01561	/	/	/	/	/	/	/	/	/	/	/	/	/	/	/	/	/	/	/	/	/	/	/	/	/	/	/	/	/	/	/	/	/	/	/	/	/	/	/	/	/	/	/	/	/	/	/	/	/
K01562	/	/	/	/	/	/	/	/	/	/	/	/	/	/	/	/	/	/	/	/	/	/	/	/	/	/	/	/	/	/	/	/	/	/	/	/	/	/	/	/	/	/	/	/	/	/	/	/	/
K01563	/	/	/	/	/	/	/	/	/	/	/	/	/	/	/	/	/	/	/	/	/	/	/	/	/	/	/	/	/	/	/	/	/	/	/	/	/	/	/	/	/	/	/	/	/	/	/	/	/
K01565	/	/	Y	/	/	/	/	/	/	Y	/	/	/	Y	/	Y	Y	/	/	/	/	/	/	Y	/	/	/	/	/	/	/	/	/	/	/	/	Y	/	/	/	Y	/	/	/	/	/	/	/	Y
K01567	/	/	/	Y	/	/	/	/	/	/	/	/	/	/	/	/	/	/	/	/	/	/	/	/	/	/	/	/	/	/	/	Y	/	Y	/	/	/	/	/	/	/	/	/	/	/	/	/	/	/
K01568	/	/	/	/	/	/	/	/	/	/	/	/	/	/	/	/	/	/	/	/	/	/	/	/	/	/	/	/	/	/	/	/	/	/	/	/	/	/	/	/	/	/	/	/	/	/	/	/	/
K01569	/	/	/	/	/	/	/	/	/	/	/	/	/	/	/	/	/	/	/	/	/	/	/	/	/	/	/	/	/	/	/	/	/	/	/	/	/	/	/	/	/	/	/	/	/	/	/	/	/
K01571	/	Y	/	/	Y	/	Y	/	/	Y	/	/	/	/	Y	Y	/	Y	/	Y	/	/	Y	/	/	/	/	Y	/	Y	/	Y	/	Y	/	Y	/	/	/	/	/	/	/	/	/	Y	/	/	Y
K01572	Y	Y	/	Y	Y	/	Y	/	/	Y	Y	/	/	/	Y	/	/	Y	/	Y	Y	Y	Y	Y	Y	/	/	Y	/	Y	/	Y	/	Y	/	Y	Y	Y	/	/	/	Y	Y	Y	/	/	Y	/	Y
K01573	/	/	/	/	/	/	/	/	/	/	/	/	/	/	/	/	/	/	/	/	/	Y	/	/	/	/	/	/	/	/	/	/	/	/	/	/	/	/	/	/	/	/	/	/	/	/	/	/	/
K01574	/	/	/	/	/	/	/	/	/	/	/	/	/	/	/	/	/	/	/	/	Y	/	/	/	/	/	/	/	/	/	/	/	/	/	/	Y	/	/	/	/	/	/	/	/	/	/	/	/	/
K01575	/	/	/	/	/	/	/	/	/	/	/	/	/	/	/	/	Y	/	/	/	/	/	/	/	/	/	/	/	/	/	Y	/	/	/	Y	/	/	/	/	Y	/	/	/	/	/	/	Y	/	/
K01576	/	/	/	/	/	/	/	/	/	/	/	/	/	/	/	/	/	/	/	/	/	/	/	/	/	/	/	/	/	/	/	/	/	/	/	/	/	/	/	Y	/	/	/	/	/	/	/	/	/
K01577	/	/	/	/	/	/	/	/	/	/	/	/	/	/	/	/	/	/	/	/	/	/	/	/	/	/	/	/	/	/	/	/	/	/	/	/	/	/	/	/	/	/	/	/	/	/	/	/	/
K01578	/	/	/	/	/	/	/	/	/	/	/	/	/	/	/	/	/	/	/	/	/	/	/	/	/	/	/	/	/	/	/	/	/	/	/	/	/	/	/	/	/	/	/	/	/	/	/	/	/
K01579	/	/	Y	/	Y	Y	/	/	Y	Y	/	Y	/	Y	/	/	Y	Y	Y	/	/	Y	Y	Y	Y	/	Y	Y	/	/	/	Y	Y	/	Y	/	Y	Y	/	/	Y	Y	Y	/	/	/	Y	/	/
K01580	/	/	/	/	/	/	/	/	/	/	/	/	/	/	/	/	/	/	/	/	Y	/	/	/	/	/	/	/	/	/	/	/	/	/	/	/	/	/	/	Y	/	/	/	/	/	/	/	/	/
K01581	/	/	/	/	/	/	/	/	/	/	/	/	/	/	/	/	/	/	/	/	/	/	Y	/	Y	/	/	/	/	Y	/	/	/	/	/	/	/	Y	/	/	/	Y	/	/	Y	/	/	/	/
K01582	/	/	/	/	/	/	Y	/	/	/	/	/	/	/	/	Y	/	/	/	/	/	/	/	/	/	/	/	/	Y	/	/	/	/	Y	/	/	/	/	/	/	/	/	/	/	/	/	/	/	/
K01583	Y	/	/	/	/	/	/	/	/	/	/	/	/	/	/	/	/	/	/	/	/	/	/	/	/	/	/	/	/	/	/	/	/	/	/	/	/	/	/	/	/	/	/	/	/	/	/	/	/
K01584	/	/	/	/	/	/	/	/	/	/	/	/	/	/	/	/	/	Y	/	/	/	/	/	/	/	/	/	/	/	/	/	/	/	/	/	/	/	/	/	/	/	/	/	/	/	/	/	/	/
K01585	/	/	/	Y	Y	Y	Y	/	/	Y	/	/	/	/	Y	Y	/	/	/	/	/	/	/	/	/	Y	/	Y	/	/	Y	Y	Y	Y	/	Y	Y	/	Y	/	/	/	/	Y	/	/	/	/	Y
K01586	/	/	Y	Y	Y	/	Y	/	/	/	Y	Y	Y	Y	Y	Y	Y	/	/	/	Y	Y	Y	/	Y	Y	Y	Y	Y	/	Y	Y	Y	Y	Y	/	Y	Y	/	Y	Y	Y	Y	Y	Y	/	Y	Y	Y
K01587	/	/	/	/	/	/	/	/	/	/	/	/	/	/	/	/	/	/	/	/	/	/	/	/	/	/	/	/	/	/	/	/	/	/	/	/	/	/	/	/	/	/	/	/	/	/	/	/	/
K01588	Y	Y	Y	Y	Y	Y	Y	Y	Y	Y	Y	Y	Y	Y	Y	/	Y	Y	Y	Y	Y	Y	Y	Y	Y	Y	Y	Y	Y	Y	Y	Y	Y	Y	/	Y	Y	Y	/	Y	Y	Y	Y	Y	Y	Y	Y	Y	Y
K01589	/	/	/	Y	/	/	/	/	/	/	/	/	/	/	/	/	/	/	/	/	Y	/	/	/	/	/	/	/	/	/	/	/	/	/	/	/	/	/	/	/	/	/	/	/	/	/	/	/	/
K01590	/	/	/	/	/	/	/	/	/	/	/	/	/	/	/	/	/	/	/	/	/	/	/	/	/	/	/	/	/	/	/	/	/	/	/	/	/	/	/	/	/	/	/	/	/	/	/	/	/
K01591	Y	/	Y	Y	/	Y	Y	Y	/	Y	Y	Y	Y	Y	Y	Y	Y	Y	Y	Y	Y	Y	Y	/	Y	Y	Y	Y	Y	Y	Y	Y	Y	Y	Y	Y	Y	Y	/	Y	Y	Y	Y	/	Y	/	Y	Y	Y
K01592	/	/	/	/	/	/	/	/	/	/	/	/	/	/	/	/	/	/	/	/	/	/	/	/	/	/	/	/	/	/	/	/	/	/	/	/	/	/	/	/	/	/	/	/	/	/	/	/	/
K01593	/	/	/	/	/	/	/	/	Y	/	/	/	/	/	/	/	/	/	/	/	/	Y	/	Y	/	/	/	/	/	/	/	/	Y	/	/	/	/	/	/	/	/	/	/	/	/	/	/	/	/
K01594	/	/	/	/	/	/	/	/	/	/	/	/	/	/	/	/	/	/	/	/	/	/	/	/	/	/	/	/	/	/	/	/	/	/	/	/	/	/	/	/	/	/	/	/	/	/	/	/	/
K01595	/	/	/	/	/	/	/	/	/	/	/	/	/	/	/	/	/	/	/	/	/	/	/	/	/	/	/	/	/	/	/	/	/	/	/	/	/	/	/	/	/	/	/	/	/	/	/	Y	/
K01596	/	Y	/	/	/	/	/	/	/	/	/	Y	/	/	/	Y	/	/	/	/	Y	/	Y	Y	/	/	/	/	/	/	/	Y	/	Y	/	Y	/	/	Y	/	Y	/	/	/	/	/	/	Y	Y
K01597	/	Y	/	/	/	/	/	/	/	/	/	/	/	/	/	/	/	/	/	/	/	Y	/	Y	/	/	/	/	/	/	/	/	/	/	/	/	/	/	/	/	/	/	/	/	/	/	/	/	/
K01598	/	/	/	/	/	/	/	/	/	/	/	/	/	/	/	/	/	/	/	/	/	/	/	/	/	/	/	/	/	/	/	/	/	/	/	/	/	/	/	/	/	/	/	/	/	Y	/	/	/
K01599	/	Y	Y	/	/	/	/	/	Y	Y	/	Y	Y	Y	/	Y	Y	/	Y	/	Y	/	Y	Y	/	Y	Y	/	/	/	/	/	Y	/	Y	Y	/	/	Y	/	Y	/	/	/	Y	/	Y	Y	Y
K01601	/	/	/	/	/	/	/	/	/	/	/	/	/	/	/	/	/	/	/	/	/	/	/	/	/	/	/	/	/	/	Y	/	/	/	/	/	/	/	/	/	/	/	Y	/	/	/	/	/	/
K01602	/	/	/	/	/	/	/	/	/	/	/	/	/	/	/	/	/	/	/	/	/	/	/	/	/	/	/	/	/	/	/	/	/	/	/	/	/	/	/	/	/	/	/	/	/	/	/	/	/
K01607	/	Y	/	/	/	/	/	Y	/	/	/	/	/	/	/	/	/	/	/	/	/	/	Y	/	/	/	Y	/	/	/	/	/	/	/	/	/	/	/	/	Y	/	/	/	/	/	/	/	Y	/
K01608	/	Y	/	/	/	/	/	/	/	/	/	/	/	/	/	/	/	/	/	/	/	/	/	/	/	/	/	/	/	/	/	/	/	/	/	/	/	/	/	/	/	/	/	/	/	/	/	/	Y
K01609	/	Y	Y	/	/	/	/	Y	/	Y	/	Y	Y	Y	Y	/	/	/	Y	/	Y	Y	Y	Y	/	/	Y	/	/	/	Y	Y	/	Y	/	/	Y	/	/	Y	Y	/	Y	/	Y	/	/	Y	Y
K01610	/	/	/	Y	/	Y	Y	/	/	/	/	Y	Y	Y	Y	/	/	Y	Y	Y	/	Y	/	/	Y	Y	/	/	Y	Y	/	/	Y	/	Y	/	Y	Y	/	Y	/	Y	/	Y	Y	Y	Y	/	/
K01611	/	/	/	Y	Y	Y	/	/	/	Y	Y	/	Y	/	Y	Y	/	/	/	Y	/	/	Y	/	/	/	/	Y	/	/	/	Y	/	/	/	/	/	Y	Y	/	/	Y	/	/	Y	/	/	/	Y
K01612	/	/	/	/	/	/	/	/	/	/	/	/	/	/	/	/	/	/	/	/	/	/	/	/	/	/	/	/	/	/	/	/	/	/	/	/	/	/	/	/	/	/	/	/	/	/	/	/	/
K01613	Y	/	/	/	/	/	/	/	Y	/	/	Y	Y	/	Y	Y	/	/	/	Y	/	Y	Y	/	/	/	Y	/	/	Y	Y	Y	Y	/	/	/	Y	/	/	Y	Y	/	/	Y	/	Y	Y	/	Y
K01615	/	/	/	/	Y	/	/	/	/	/	/	/	/	/	/	/	/	/	/	/	/	/	/	/	/	/	/	/	/	/	/	/	/	/	/	/	/	/	/	/	/	/	/	/	/	/	/	/	/
K01616	/	/	/	/	/	/	/	/	/	/	/	/	/	/	/	/	/	/	/	/	/	/	/	/	/	/	/	/	/	/	/	/	/	/	/	/	/	/	/	/	/	/	/	/	/	/	/	/	/
K01617	/	/	/	/	/	/	/	/	/	/	/	/	/	/	/	/	/	/	/	/	/	/	/	/	/	/	/	/	/	/	/	/	/	/	/	/	/	/	/	/	/	/	/	/	/	/	/	/	/
K01619	Y	Y	Y	/	Y	Y	/	Y	Y	Y	/	Y	/	Y	Y	Y	/	Y	Y	Y	Y	Y	/	Y	Y	Y	Y	Y	Y	Y	/	Y	Y	Y	Y	Y	Y	Y	Y	/	Y	Y	Y	/	Y	Y	Y	/	Y
K01620	Y	Y	/	/	/	Y	Y	/	Y	Y	Y	Y	/	Y	/	Y	Y	Y	Y	Y	Y	Y	/	Y	Y	Y	/	Y	Y	Y	/	/	Y	Y	Y	Y	Y	Y	/	/	Y	Y	Y	Y	Y	Y	Y	/	/
K01621	/	/	/	/	/	/	/	/	/	/	/	Y	/	/	/	/	Y	/	/	/	Y	/	/	/	/	/	/	/	/	/	/	/	/	/	/	/	/	/	/	/	/	/	Y	/	/	/	/	/	/
K01622	/	/	/	/	/	/	/	/	/	/	/	/	/	/	/	/	/	/	/	/	/	/	/	/	/	/	/	/	/	/	Y	/	/	/	/	/	/	/	/	/	/	/	/	/	/	/	/	/	/
K01623	/	Y	/	/	/	/	/	/	/	/	/	/	/	/	/	/	/	/	/	/	Y	/	/	/	/	/	/	/	/	/	/	/	/	/	/	/	/	/	/	/	/	/	Y	/	/	/	/	/	/
K01624	Y	Y	Y	Y	Y	Y	/	/	/	Y	Y	Y	/	Y	/	Y	Y	Y	Y	Y	Y	Y	Y	Y	Y	Y	Y	Y	/	/	/	Y	Y	Y	/	Y	Y	Y	Y	Y	Y	Y	Y	/	Y	/	Y	Y	Y
K01625	/	Y	Y	/	/	/	/	Y	Y	Y	/	Y	/	Y	/	Y	Y	/	Y	/	Y	/	/	Y	/	/	Y	/	Y	Y	/	/	/	Y	/	/	Y	/	/	/	Y	/	/	/	Y	/	/	/	Y
K01626	/	/	/	/	/	/	/	Y	/	/	/	/	/	/	/	Y	/	/	/	/	/	/	/	/	/	/	Y	/	/	/	/	/	/	/	/	/	/	/	/	/	Y	/	Y	/	/	/	/	Y	Y
K01627	/	/	Y	/	/	/	/	/	/	/	/	Y	Y	Y	/	/	Y	Y	Y	Y	/	Y	Y	/	Y	/	Y	/	/	Y	/	/	Y	/	Y	/	/	/	/	Y	/	Y	/	/	/	Y	Y	/	/
K01628	Y	/	/	/	Y	Y	Y	/	/	Y	Y	/	Y	/	Y	/	/	/	Y	Y	/	/	/	/	/	Y	Y	Y	/	/	Y	Y	/	/	/	Y	Y	/	/	/	Y	/	/	Y	Y	/	Y	/	Y
K01629	/	/	/	Y	/	/	/	/	/	/	/	/	/	Y	/	/	/	/	/	/	/	/	/	/	Y	/	/	/	/	/	/	/	/	/	/	/	/	Y	/	/	/	Y	/	/	/	Y	/	/	/
K01630	/	/	/	/	/	/	/	/	/	/	/	/	Y	/	/	Y	/	/	/	/	/	/	/	/	/	/	/	/	/	/	/	/	/	/	/	/	/	/	/	Y	/	/	/	/	/	/	/	Y	/
K01631	/	/	/	/	/	/	/	/	/	/	/	/	/	/	/	/	/	/	/	/	Y	/	/	/	/	/	/	/	/	/	/	/	/	/	/	/	/	/	/	/	/	/	/	/	/	/	/	/	/
K01633	/	Y	/	/	Y	/	/	Y	/	Y	/	Y	/	Y	/	/	Y	/	Y	/	/	/	/	/	/	/	/	Y	/	/	/	Y	Y	/	/	/	Y	Y	/	/	Y	Y	/	Y	/	/	/	Y	Y
K01634	/	/	/	/	/	/	/	/	/	/	/	/	/	/	/	/	/	/	/	/	/	/	/	/	/	/	/	/	/	/	/	/	Y	/	/	/	/	/	/	/	/	/	/	/	/	/	/	/	/
K01635	/	/	/	/	/	/	/	/	/	/	/	/	/	/	/	/	/	/	/	/	/	/	/	/	/	/	/	/	/	/	/	/	/	/	/	/	/	/	/	/	/	/	/	/	/	/	/	/	/
K01637	/	/	/	/	/	/	/	/	/	/	/	/	/	/	/	/	/	/	/	/	/	/	/	/	/	/	/	/	/	/	/	/	/	/	/	/	/	/	/	/	/	/	/	/	/	/	/	/	/
K01638	/	/	/	/	/	/	/	/	/	/	/	/	/	/	/	/	/	/	/	/	/	/	Y	/	/	/	/	/	/	/	/	/	/	/	/	/	/	/	/	Y	/	/	/	/	/	/	/	/	/
K01639	/	/	Y	/	/	/	/	/	/	Y	/	/	/	Y	/	Y	/	/	/	/	/	Y	/	Y	/	/	Y	/	/	/	/	/	/	/	Y	Y	/	/	/	/	Y	/	/	/	/	/	/	/	/
K01640	/	/	/	/	/	/	/	/	/	/	/	/	Y	/	/	/	/	/	/	/	/	/	/	/	/	/	/	/	/	Y	/	/	/	/	/	/	/	/	/	/	/	/	/	/	/	Y	/	/	Y
K01641	/	Y	/	/	/	/	/	/	/	/	/	/	/	/	/	/	/	/	/	/	/	/	/	Y	/	/	/	/	/	/	Y	/	/	/	/	/	/	/	/	/	/	/	/	/	/	/	/	/	/
K01643	/	/	/	/	/	/	/	/	/	/	/	/	/	/	/	/	/	/	/	Y	/	/	/	/	/	/	/	/	/	Y	/	/	Y	/	Y	/	/	/	Y	/	/	/	/	/	/	/	Y	/	/
K01644	/	/	/	/	Y	/	Y	Y	/	/	/	/	Y	/	/	/	/	Y	/	Y	/	/	/	/	/	/	/	/	/	Y	/	/	Y	/	Y	/	/	/	Y	/	/	/	/	/	/	/	Y	/	/
K01645	/	/	/	/	/	/	/	/	/	/	/	/	/	/	/	/	/	/	/	/	/	/	/	/	/	/	/	/	/	/	/	/	/	/	/	/	/	/	/	/	/	/	/	/	/	/	/	/	/
K01646	/	/	/	/	Y	/	Y	/	/	/	/	/	/	/	/	/	/	/	/	Y	/	/	/	/	/	/	/	/	/	Y	/	/	/	/	/	/	/	/	Y	/	/	/	/	/	/	/	Y	/	/
K01647	/	/	/	/	/	/	/	Y	Y	/	/	/	/	/	Y	Y	/	/	/	/	/	Y	Y	Y	/	/	Y	Y	/	/	/	Y	Y	Y	Y	/	Y	/	/	Y	Y	/	Y	/	/	/	/	Y	Y
K01648	/	/	/	/	/	/	/	/	/	/	/	/	/	/	/	/	/	/	/	/	/	/	/	/	/	/	/	/	/	/	/	/	/	/	/	/	/	/	/	/	/	/	/	/	/	/	/	/	/
K01649	Y	Y	Y	/	Y	/	/	Y	/	Y	Y	Y	Y	Y	Y	Y	Y	/	Y	/	Y	Y	Y	Y	/	/	Y	Y	/	Y	Y	Y	Y	Y	Y	/	Y	/	/	Y	Y	/	Y	/	Y	Y	Y	Y	Y
K01652	/	Y	Y	/	/	/	Y	Y	/	/	Y	Y	Y	Y	/	Y	Y	/	Y	Y	Y	Y	Y	Y	/	/	Y	Y	/	Y	Y	Y	Y	Y	Y	/	Y	/	/	Y	Y	/	Y	/	Y	/	Y	Y	Y
K01653	/	Y	Y	/	Y	/	/	Y	/	/	Y	Y	Y	Y	/	Y	Y	/	Y	/	Y	Y	Y	Y	/	/	Y	Y	/	Y	Y	Y	Y	Y	Y	/	Y	/	/	Y	Y	/	Y	/	Y	/	Y	Y	Y
K01654	/	/	/	/	/	/	/	Y	/	Y	/	/	/	/	Y	/	Y	/	Y	/	/	/	Y	/	/	/	/	/	/	/	/	Y	/	/	Y	/	/	/	/	/	/	/	/	/	/	/	/	/	/
K01655	/	/	/	/	/	/	/	/	/	/	/	/	/	/	/	/	/	/	/	/	/	/	/	Y	/	/	/	/	/	/	/	/	/	/	/	/	/	/	/	/	/	/	/	/	/	/	/	/	/
K01656	/	/	/	/	/	/	/	/	/	/	/	/	/	/	/	/	/	/	/	/	/	/	/	/	/	/	/	/	/	/	/	/	/	/	/	/	/	/	/	/	/	/	/	/	/	/	/	/	/
K01657	/	Y	Y	/	/	/	/	/	/	Y	/	Y	Y	Y	/	/	Y	/	Y	/	Y	/	Y	Y	/	/	Y	/	/	/	Y	Y	/	Y	Y	/	Y	/	/	Y	Y	/	Y	/	Y	/	/	Y	Y
K01658	/	/	Y	/	/	/	/	/	/	/	/	Y	Y	Y	/	/	/	/	Y	/	/	/	Y	Y	/	/	Y	/	/	/	Y	Y	/	Y	/	/	Y	/	/	Y	Y	/	/	Y	/	/	/	/	Y
K01659	/	/	/	/	/	/	/	/	/	/	/	/	/	/	/	/	/	/	/	/	/	/	/	/	/	/	/	/	/	/	/	/	/	/	/	/	/	/	/	/	/	/	/	/	/	/	/	/	/
K01661	/	/	/	/	/	/	/	Y	/	/	/	/	/	/	/	/	/	/	/	/	Y	/	/	/	/	/	/	/	/	/	/	/	/	/	/	/	/	/	/	/	Y	/	/	/	/	/	/	/	/
K01662	Y	/	Y	Y	/	Y	Y	Y	/	Y	/	Y	/	Y	/	Y	Y	Y	Y	Y	Y	/	Y	/	Y	Y	Y	Y	Y	Y	/	Y	/	Y	Y	Y	Y	Y	Y	Y	Y	/	Y	/	/	Y	Y	Y	Y
K01663	/	/	/	/	/	/	/	/	/	/	/	/	/	/	/	/	/	/	/	/	/	/	/	/	/	/	/	/	/	/	/	/	/	/	/	/	/	/	/	/	/	/	/	/	/	/	/	/	/
K01664	/	/	/	/	/	/	/	Y	/	/	/	/	/	/	/	/	Y	/	/	/	Y	/	/	/	/	/	/	/	/	/	/	/	/	/	/	/	/	/	/	/	/	/	Y	/	/	/	/	/	/
K01665	/	/	Y	/	/	/	/	/	/	/	/	/	/	/	/	/	/	/	Y	/	/	/	/	/	/	/	Y	/	/	/	/	/	/	/	Y	/	Y	/	/	/	/	/	/	/	/	/	/	Y	Y
K01666	/	/	Y	/	/	/	/	/	/	/	/	/	Y	/	/	/	/	/	/	/	/	/	/	/	/	/	Y	/	/	/	/	/	/	/	Y	/	/	/	/	/	Y	/	/	/	Y	/	/	/	/
K01667	Y	/	/	/	/	/	/	Y	/	Y	Y	/	/	/	/	/	/	/	/	Y	Y	Y	/	Y	/	Y	Y	Y	Y	Y	/	/	/	/	/	Y	Y	/	Y	/	/	Y	/	Y	/	/	/	/	/
K01668	/	/	/	/	/	/	/	/	/	/	/	/	/	/	/	/	/	/	/	/	/	/	/	/	/	Y	/	/	Y	/	/	/	/	/	/	Y	Y	/	Y	/	/	/	/	/	/	/	/	/	/
K01669	/	Y	/	Y	/	/	/	Y	Y	/	Y	/	Y	Y	/	Y	/	Y	/	/	/	/	Y	/	/	/	Y	/	/	Y	Y	/	Y	/	Y	/	/	/	/	Y	Y	Y	Y	Y	Y	/	/	Y	/
K01670	/	/	/	/	/	/	/	/	/	/	/	/	/	/	/	/	/	/	/	/	/	/	/	/	/	/	/	/	/	/	/	/	/	/	/	/	/	/	/	/	/	/	/	/	/	/	/	/	/
K01671	/	/	/	/	/	/	/	/	/	/	/	/	/	/	/	/	/	/	/	/	/	/	/	/	/	/	/	/	/	/	/	/	/	/	/	/	/	/	/	/	/	/	/	/	/	/	/	/	/
K01672	/	/	/	/	/	/	/	/	/	/	/	/	/	/	/	/	/	/	/	/	/	/	/	/	/	/	/	/	/	/	/	/	/	/	/	/	/	/	/	/	/	/	/	/	/	/	/	/	/
K01673	/	/	/	/	Y	/	/	Y	/	/	/	/	/	/	/	/	/	/	/	Y	Y	/	Y	/	/	/	/	/	/	Y	/	/	/	/	/	/	/	/	/	/	/	/	Y	/	/	/	/	Y	/
K01674	/	/	/	/	/	/	/	/	/	/	/	/	/	/	/	/	/	/	/	/	/	/	/	Y	/	/	/	/	/	/	/	/	/	/	/	/	/	/	/	/	/	/	/	/	/	/	/	/	/
K01676	/	/	/	/	/	/	/	Y	/	Y	/	/	/	/	/	/	/	/	/	/	/	/	Y	Y	/	/	/	/	/	/	/	/	Y	/	/	/	Y	/	/	/	/	/	/	Y	/	/	/	/	/
K01677	Y	/	Y	Y	Y	Y	Y	/	/	/	Y	Y	Y	Y	/	/	Y	/	Y	Y	/	/	/	/	Y	Y	/	/	Y	Y	Y	Y	/	Y	Y	Y	/	Y	Y	Y	/	Y	/	Y	Y	Y	Y	/	Y
K01678	Y	/	Y	Y	Y	Y	Y	/	/	/	Y	Y	Y	Y	Y	Y	Y	/	Y	Y	/	/	/	/	Y	Y	/	/	Y	Y	Y	Y	/	/	Y	Y	/	Y	Y	Y	/	Y	/	Y	Y	Y	Y	/	Y
K01679	/	Y	/	/	/	/	/	Y	/	/	/	/	/	/	/	/	/	/	/	/	Y	Y	/	/	/	/	Y	/	/	/	/	/	Y	/	/	/	/	/	/	/	Y	/	Y	/	/	/	/	Y	/
K01681	/	Y	Y	/	/	/	/	Y	/	Y	/	Y	Y	Y	Y	/	Y	/	Y	/	Y	Y	Y	Y	/	/	Y	Y	/	/	Y	/	Y	Y	/	/	/	/	/	/	Y	/	Y	/	/	/	/	/	/
K01682	/	/	/	/	/	/	/	/	/	/	/	/	/	/	/	/	/	/	/	/	/	/	/	/	/	/	/	/	/	/	/	/	/	/	/	/	/	/	/	/	/	/	/	/	/	/	/	/	/
K01683	/	Y	/	/	/	/	Y	/	/	/	/	/	Y	/	/	/	/	/	/	/	/	/	/	/	/	/	/	/	/	/	/	/	/	/	/	/	/	/	/	/	/	/	/	/	/	/	/	/	/
K01684	/	Y	/	/	/	/	Y	/	/	Y	/	/	/	Y	/	Y	Y	/	Y	/	/	/	/	Y	/	/	Y	/	Y	Y	/	/	/	/	/	/	/	/	/	/	Y	/	/	/	/	/	/	/	/
K01685	/	/	/	/	/	/	/	/	/	Y	/	/	/	/	/	/	/	/	/	/	Y	/	/	Y	/	/	/	/	/	Y	/	/	/	/	/	/	/	/	/	/	/	/	/	/	/	/	/	/	/
K01686	/	Y	/	/	/	/	/	/	/	Y	/	/	/	/	/	Y	/	/	/	/	Y	/	/	Y	/	/	/	/	/	Y	/	/	/	Y	/	/	Y	/	/	/	/	/	/	/	/	/	/	/	Y
K01687	/	Y	Y	/	Y	/	Y	/	/	Y	/	Y	Y	/	Y	/	Y	/	/	Y	Y	Y	Y	Y	/	/	Y	Y	/	Y	Y	Y	Y	Y	Y	/	Y	/	/	Y	Y	/	/	/	Y	/	Y	/	Y
K01689	Y	Y	Y	Y	Y	Y	Y	Y	/	Y	Y	Y	Y	Y	Y	Y	Y	Y	Y	Y	Y	Y	Y	/	Y	Y	Y	Y	Y	Y	Y	Y	Y	Y	/	Y	Y	Y	Y	/	Y	Y	Y	Y	Y	Y	Y	Y	Y
K01690	/	/	/	/	/	/	/	/	/	/	/	/	/	/	/	/	/	/	/	/	/	/	/	/	/	/	/	/	/	/	/	/	/	/	/	/	/	/	/	/	/	/	/	/	/	/	/	/	/
K01691	/	/	/	/	/	/	/	/	/	/	/	/	/	/	/	/	/	/	/	/	/	/	/	/	/	/	/	/	/	/	/	/	/	/	/	/	/	/	/	/	/	/	/	/	/	/	/	/	/
K01692	/	/	/	/	/	/	/	Y	/	/	/	/	/	/	/	/	/	/	/	/	Y	/	/	/	/	/	/	/	/	/	/	/	/	/	/	/	/	/	/	/	/	/	/	/	/	/	/	/	/
K01693	/	Y	Y	Y	Y	/	Y	Y	/	Y	/	Y	/	Y	/	Y	Y	/	Y	Y	Y	/	Y	Y	/	/	Y	Y	/	Y	Y	Y	/	Y	/	/	/	/	/	Y	Y	/	Y	/	Y	Y	Y	Y	Y
K01694	/	/	/	/	/	/	/	/	/	/	/	/	/	/	/	/	/	/	/	/	/	/	/	/	/	/	/	/	/	/	/	/	/	/	/	/	/	/	/	/	/	/	/	/	/	/	/	/	/
K01695	/	Y	Y	/	/	/	Y	/	/	/	/	Y	Y	Y	Y	Y	/	/	Y	/	Y	Y	Y	Y	/	Y	Y	/	/	Y	Y	Y	/	Y	Y	/	Y	/	/	Y	Y	/	Y	/	Y	/	/	Y	Y
K01696	/	Y	Y	/	/	/	/	/	/	Y	/	Y	Y	Y	Y	/	/	/	Y	Y	Y	Y	Y	Y	/	Y	Y	/	Y	Y	/	Y	/	Y	Y	/	Y	/	/	Y	Y	/	Y	/	Y	/	Y	Y	Y
K01697	/	/	/	/	/	/	/	/	/	/	/	/	/	/	/	/	/	/	/	/	/	/	/	/	/	/	/	/	/	/	/	/	/	/	/	/	/	/	/	/	/	/	/	/	/	Y	/	/	/
K01698	/	/	Y	/	Y	/	/	/	/	/	/	Y	Y	/	/	/	/	/	/	/	/	/	Y	/	/	/	Y	/	/	/	/	Y	/	/	Y	/	/	/	/	Y	Y	/	/	/	Y	/	/	Y	/
K01699	/	/	/	/	/	/	/	/	/	/	/	/	Y	/	/	/	/	/	/	/	Y	/	/	/	/	/	/	/	/	/	/	/	/	/	/	/	/	/	/	/	/	/	/	/	/	/	/	/	/
K01702	/	/	/	/	/	/	/	/	/	/	/	/	/	/	/	/	/	/	/	/	/	/	/	/	/	/	/	/	/	/	/	/	/	/	/	/	/	/	/	/	/	/	/	/	/	/	/	/	/
K01703	/	Y	Y	/	Y	Y	Y	Y	/	Y	Y	Y	Y	Y	Y	/	Y	Y	/	Y	Y	Y	Y	Y	/	/	Y	Y	/	Y	Y	Y	Y	Y	Y	/	Y	/	/	Y	Y	/	Y	/	Y	Y	Y	Y	Y
K01704	/	Y	/	/	Y	Y	Y	Y	/	Y	Y	/	Y	Y	Y	Y	Y	Y	Y	Y	Y	Y	Y	Y	/	/	Y	Y	/	Y	Y	Y	Y	Y	Y	/	Y	/	/	Y	Y	/	/	/	Y	Y	Y	Y	Y
K01705	/	/	/	/	/	/	/	/	/	/	/	/	/	/	/	/	/	/	/	/	/	/	/	/	/	/	/	/	/	/	/	/	/	/	/	/	/	/	/	/	/	/	/	/	/	/	/	/	/
K01706	/	/	/	/	/	/	/	/	/	/	/	/	/	/	/	Y	/	/	/	/	/	/	/	/	/	/	/	/	/	Y	/	/	/	/	/	/	/	/	/	/	/	/	/	/	/	/	/	/	/
K01707	/	/	/	/	/	/	/	/	/	/	/	/	/	/	/	/	/	/	/	/	/	/	/	/	/	/	/	/	/	/	/	/	/	/	/	/	/	/	/	/	/	/	/	/	/	/	/	/	/
K01708	/	/	/	/	/	/	/	/	/	/	/	/	/	/	/	/	/	/	/	/	/	/	/	/	/	/	/	/	/	Y	/	/	/	/	/	/	/	/	/	/	/	/	/	/	/	/	/	/	/
K01709	/	/	/	/	/	/	/	/	/	/	/	/	/	Y	/	/	Y	/	Y	/	/	/	/	/	/	/	/	/	/	/	/	/	/	/	/	/	/	/	/	/	Y	/	/	/	/	/	/	/	/
K01710	/	Y	Y	Y	/	Y	Y	/	/	Y	/	Y	/	Y	/	/	Y	Y	Y	/	/	Y	Y	Y	Y	/	Y	Y	/	/	Y	/	Y	Y	/	/	Y	Y	Y	Y	Y	Y	/	Y	/	/	/	Y	/
K01711	/	Y	/	/	/	Y	/	/	/	/	/	/	Y	/	/	/	/	Y	/	/	/	Y	/	Y	/	/	Y	/	/	Y	Y	/	/	Y	/	/	Y	/	/	Y	Y	/	/	/	/	/	/	/	/
K01712	Y	/	/	Y	/	Y	Y	/	/	/	/	/	/	/	/	/	/	Y	/	Y	/	/	/	Y	Y	Y	/	/	Y	/	/	/	Y	/	/	Y	Y	Y	Y	/	/	Y	/	Y	/	/	Y	/	/
K01713	/	/	/	/	/	/	/	/	/	/	/	/	/	/	/	/	/	/	/	/	/	/	/	/	/	/	/	/	/	Y	/	/	/	/	/	/	/	/	/	/	/	/	/	/	/	/	/	/	/
K01714	Y	Y	Y	Y	Y	Y	Y	Y	/	Y	Y	Y	/	Y	Y	/	Y	Y	Y	/	Y	Y	Y	Y	Y	Y	Y	Y	Y	Y	Y	Y	Y	Y	/	Y	Y	Y	/	Y	Y	Y	Y	/	Y	/	Y	Y	Y
K01715	Y	/	/	Y	Y	/	/	/	/	/	/	/	Y	/	Y	/	/	/	/	Y	/	/	/	/	/	Y	/	Y	Y	Y	/	Y	/	/	/	/	/	/	/	/	/	/	/	Y	/	/	/	/	/
K01716	/	/	/	/	/	/	/	/	/	/	/	/	/	/	/	/	/	/	/	/	/	/	/	/	/	/	/	/	/	/	/	/	/	/	/	/	/	/	/	/	/	/	/	/	/	/	/	/	/
K01719	/	/	/	/	/	/	/	/	/	/	/	/	/	/	/	/	/	/	/	/	/	Y	/	/	/	/	/	/	/	/	/	/	Y	/	/	/	Y	/	/	/	/	/	/	Y	/	/	/	/	/
K01720	/	/	/	/	/	/	/	/	/	/	/	/	Y	/	/	/	/	/	/	/	/	/	/	/	/	/	/	/	/	/	/	/	/	/	/	/	/	/	/	/	/	/	/	/	/	/	/	/	/
K01721	/	/	/	/	/	/	/	/	/	/	/	/	/	/	/	/	/	/	/	/	/	/	/	/	/	/	/	/	/	/	/	/	/	/	/	/	/	/	/	/	/	/	/	/	/	/	/	/	/
K01723	/	/	/	/	/	/	/	/	/	/	/	/	/	/	/	/	/	/	/	/	/	/	/	/	/	/	/	/	/	/	/	/	/	/	/	/	/	/	/	/	/	/	/	/	/	/	/	/	/
K01724	/	/	Y	/	/	/	/	/	/	/	/	Y	/	/	/	/	/	/	/	/	/	Y	/	/	/	/	/	/	/	/	/	/	/	/	/	/	/	/	/	/	Y	/	Y	/	/	/	/	Y	/
K01725	/	/	/	/	/	/	/	/	/	/	/	/	/	/	/	/	/	/	/	/	/	/	/	/	/	/	/	/	/	/	/	/	/	/	/	/	/	/	/	/	/	/	/	/	/	/	/	/	/
K01727	/	/	/	/	/	/	/	/	/	/	/	/	/	/	/	/	/	/	/	/	/	/	/	/	/	/	/	/	/	/	/	/	/	/	/	/	/	/	/	/	/	/	/	/	/	/	/	/	/
K01728	/	/	/	/	/	/	/	/	/	/	/	/	/	Y	/	/	/	/	/	/	/	/	/	/	/	/	/	/	/	/	/	/	/	/	/	/	/	/	/	/	/	/	/	/	/	/	/	Y	/
K01729	/	/	/	/	/	/	/	/	/	Y	/	/	/	/	/	/	/	/	/	/	/	/	/	/	/	/	/	/	/	/	/	/	/	/	/	/	/	/	/	/	/	/	/	/	/	/	/	/	/
K01730	/	/	Y	/	/	/	/	/	/	/	/	/	/	Y	/	/	/	/	/	/	/	/	/	Y	/	/	/	/	/	/	/	/	Y	/	/	/	/	/	/	/	/	/	/	/	/	/	/	/	/
K01731	/	/	/	/	/	/	/	/	/	/	/	/	/	/	/	/	/	/	/	/	/	/	/	/	/	/	/	/	/	/	/	/	/	/	/	/	/	/	/	/	/	/	/	/	/	/	/	/	/
K01732	/	/	/	/	/	/	/	/	/	/	/	/	/	/	/	/	/	/	/	/	/	/	/	/	/	/	/	/	/	/	/	/	/	/	/	/	/	/	/	/	/	/	/	/	/	/	/	/	/
K01733	Y	Y	Y	/	Y	Y	Y	/	Y	/	Y	Y	Y	Y	/	Y	Y	/	/	Y	/	Y	Y	Y	Y	/	Y	Y	Y	Y	Y	Y	Y	Y	Y	Y	Y	/	Y	Y	Y	Y	Y	Y	/	/	Y	/	Y
K01734	Y	/	/	/	/	Y	/	/	/	Y	/	/	/	/	/	Y	/	/	/	/	/	Y	/	/	/	Y	/	/	/	/	/	/	/	Y	/	/	Y	/	Y	/	/	/	/	Y	Y	/	/	Y	Y
K01735	/	/	Y	/	/	/	/	Y	/	/	/	Y	/	/	Y	Y	/	Y	Y	/	Y	Y	/	/	/	/	Y	Y	Y	/	/	Y	Y	Y	/	/	Y	/	Y	Y	Y	Y	/	/	/	/	Y	Y	Y
K01736	/	/	Y	/	/	/	Y	/	/	Y	/	Y	Y	Y	Y	Y	Y	/	Y	/	Y	/	Y	Y	/	Y	Y	Y	Y	Y	Y	Y	Y	Y	Y	/	Y	/	Y	Y	Y	/	Y	Y	Y	/	Y	Y	Y
K01737	/	/	Y	/	Y	Y	Y	/	Y	/	/	Y	Y	Y	/	/	Y	/	Y	Y	/	/	Y	/	Y	/	Y	/	/	Y	Y	Y	Y	/	/	/	Y	Y	/	Y	/	Y	/	Y	/	/	Y	Y	/
K01738	Y	Y	Y	/	Y	/	Y	Y	/	Y	/	Y	/	Y	Y	Y	Y	/	Y	Y	/	Y	Y	Y	/	/	Y	Y	/	Y	/	Y	Y	Y	/	Y	Y	/	Y	Y	Y	/	Y	/	Y	/	Y	Y	Y
K01739	/	/	/	/	/	/	/	Y	/	/	/	/	/	/	/	/	/	/	/	Y	Y	Y	Y	/	/	/	Y	/	/	/	/	Y	/	Y	/	/	/	/	/	/	/	/	Y	/	/	/	/	/	/
K01740	/	Y	Y	/	Y	/	/	Y	/	Y	/	Y	/	/	/	/	/	/	Y	/	/	Y	Y	Y	/	/	Y	/	/	/	/	/	Y	Y	Y	/	Y	/	/	Y	Y	/	Y	/	/	/	Y	/	Y
K01741	/	/	/	/	/	/	/	/	/	/	/	/	/	/	/	/	/	/	/	/	/	/	/	/	/	/	/	/	/	/	/	/	/	/	/	/	/	/	/	/	/	/	/	/	/	/	/	/	/
K01744	Y	/	/	/	/	/	/	/	/	/	/	Y	Y	Y	/	/	/	/	Y	/	/	/	Y	/	/	/	Y	/	/	/	/	/	/	/	/	/	/	/	Y	Y	/	/	/	Y	/	/	/	/	/
K01745	Y	/	/	Y	/	Y	Y	/	Y	/	/	/	Y	/	/	/	/	Y	/	Y	/	/	/	Y	Y	Y	/	/	Y	/	/	/	Y	/	/	Y	Y	Y	Y	/	/	Y	/	Y	/	Y	Y	/	/
K01746	Y	/	/	Y	/	/	Y	/	/	/	Y	/	/	/	Y	/	/	/	/	/	/	/	/	/	/	Y	Y	/	Y	Y	/	Y	/	/	/	Y	Y	/	Y	/	/	/	/	/	/	/	Y	/	/
K01749	/	/	Y	/	Y	/	/	/	/	/	/	Y	Y	/	/	/	/	/	/	/	/	/	Y	/	/	/	Y	/	/	/	Y	Y	/	/	Y	/	/	/	/	Y	Y	/	/	/	Y	/	/	Y	/
K01750	/	/	/	/	/	/	/	/	Y	/	Y	/	Y	/	/	/	/	/	/	Y	/	/	/	/	/	/	/	/	/	Y	/	/	/	/	/	/	/	/	/	Y	/	/	/	/	/	/	Y	/	/
K01751	/	/	/	/	/	/	Y	/	/	/	/	/	/	/	/	/	/	/	/	/	Y	/	/	/	/	/	/	/	/	/	/	/	/	/	/	/	/	/	/	/	/	/	Y	/	/	Y	/	/	/
K01752	Y	/	/	Y	/	/	/	Y	Y	/	/	/	/	/	/	Y	/	/	/	/	/	/	/	Y	/	Y	/	/	Y	Y	/	/	Y	/	/	Y	Y	/	Y	/	/	/	Y	/	/	/	Y	/	/
K01753	/	/	/	/	/	/	Y	/	/	/	/	/	/	/	/	/	/	/	/	/	Y	/	/	/	/	/	/	/	/	Y	/	/	/	/	/	/	/	/	/	Y	/	/	/	/	/	/	/	/	/
K01754	/	/	/	/	/	/	/	Y	/	/	Y	/	Y	/	/	/	/	/	Y	Y	Y	Y	/	Y	/	/	/	/	Y	Y	Y	Y	Y	/	/	/	/	/	/	Y	/	/	Y	/	/	/	Y	/	Y
K01755	/	Y	Y	/	/	/	Y	/	/	/	/	Y	Y	Y	Y	Y	/	/	Y	Y	Y	Y	Y	Y	/	Y	Y	/	/	Y	Y	Y	Y	Y	Y	/	Y	/	/	Y	Y	/	/	/	/	/	Y	Y	/
K01756	Y	Y	Y	/	/	/	/	Y	Y	Y	/	Y	/	Y	Y	Y	Y	Y	/	Y	Y	Y	Y	Y	Y	Y	Y	/	Y	/	Y	Y	Y	Y	Y	Y	Y	Y	Y	Y	Y	Y	Y	Y	Y	Y	Y	Y	Y
K01757	/	/	/	/	/	/	/	/	/	/	/	/	/	/	/	/	/	/	/	/	/	/	/	/	/	/	/	/	/	/	/	/	/	/	/	/	/	/	/	/	/	/	/	/	/	/	/	/	/
K01758	Y	/	/	Y	Y	/	Y	/	/	Y	/	/	/	/	/	Y	/	/	/	/	/	/	/	/	/	Y	Y	Y	Y	/	/	Y	/	Y	/	Y	/	/	/	/	Y	/	/	/	/	/	/	/	Y
K01759	Y	/	Y	/	/	Y	Y	/	/	Y	Y	Y	/	/	/	Y	/	/	/	/	/	/	/	/	/	Y	/	/	/	Y	/	/	/	Y	/	Y	Y	/	/	/	Y	/	/	Y	/	Y	Y	/	Y
K01760	/	/	/	/	/	/	/	/	/	/	/	/	/	Y	/	/	/	/	/	/	/	/	/	/	/	/	/	/	/	/	/	Y	/	/	/	/	/	/	/	/	/	/	/	/	/	/	/	/	/
K01761	Y	/	/	/	/	Y	Y	Y	/	/	/	/	Y	/	/	/	/	Y	/	/	/	/	/	Y	/	Y	/	/	Y	/	/	/	Y	/	/	/	/	Y	/	/	/	Y	/	/	/	/	/	/	/
K01762	/	/	/	/	/	/	/	/	/	/	/	/	/	/	/	/	/	/	/	/	/	/	/	/	/	/	/	/	/	/	/	/	/	/	/	/	/	/	/	/	/	/	/	/	/	/	/	/	/
K01763	/	/	/	/	/	/	/	/	/	/	/	/	/	/	/	/	/	/	/	/	/	/	/	/	/	/	/	/	/	/	/	/	/	/	/	/	/	/	/	/	/	/	/	/	/	/	/	/	/
K01764	/	/	/	/	/	/	/	/	/	/	/	/	/	/	/	/	/	/	/	/	/	/	/	/	/	/	/	/	/	/	/	/	/	/	/	/	/	/	/	/	/	/	/	/	/	/	/	/	/
K01766	/	/	/	/	/	/	/	/	/	/	/	/	/	/	/	/	/	/	/	/	/	/	/	/	/	/	/	/	/	/	/	/	/	/	/	/	/	/	/	/	/	/	/	/	/	/	/	/	/
K01768	/	/	/	/	/	Y	/	/	Y	Y	/	/	/	Y	Y	/	Y	Y	/	/	/	/	Y	/	Y	/	/	/	/	/	/	Y	Y	/	Y	/	/	/	/	Y	Y	Y	Y	Y	/	Y	/	/	/
K01769	/	/	/	/	/	/	/	/	/	/	/	/	/	/	/	/	/	/	/	/	/	/	/	/	/	/	/	/	/	/	/	/	/	/	/	/	/	/	/	/	/	/	/	/	/	/	/	/	/
K01770	/	/	/	/	Y	Y	Y	Y	Y	/	Y	/	/	/	/	Y	/	/	/	/	Y	Y	Y	/	Y	/	Y	Y	/	/	/	/	Y	Y	/	/	Y	Y	Y	/	Y	Y	Y	/	Y	Y	/	/	Y
K01771	/	/	/	/	/	/	/	/	/	/	/	/	/	/	/	/	/	/	/	/	/	/	/	/	/	/	/	/	/	/	/	/	/	/	/	/	/	/	/	/	/	/	/	/	/	/	/	/	/
K01772	/	/	/	/	/	/	/	/	/	/	/	/	/	/	/	/	/	/	/	/	Y	/	Y	Y	/	/	Y	/	/	/	/	/	/	/	/	/	Y	/	/	/	/	/	/	/	/	/	/	/	/
K01773	/	/	/	/	/	/	/	/	/	/	/	/	/	/	/	/	/	/	/	/	/	/	/	/	/	/	/	/	/	/	/	/	/	/	/	/	/	/	/	/	/	/	/	/	/	/	/	/	/
K01775	Y	Y	Y	Y	Y	Y	Y	Y	/	Y	Y	Y	Y	Y	Y	Y	Y	Y	Y	Y	Y	Y	Y	/	Y	Y	/	Y	Y	Y	/	Y	Y	Y	/	Y	Y	Y	Y	Y	Y	Y	Y	Y	Y	Y	/	Y	Y
K01776	Y	Y	Y	Y	Y	Y	/	Y	/	Y	/	Y	/	/	Y	Y	/	Y	/	/	Y	Y	/	/	/	Y	/	Y	Y	/	/	Y	Y	Y	/	Y	Y	Y	Y	Y	Y	Y	Y	Y	Y	/	/	Y	/
K01777	/	/	/	/	/	/	/	/	/	/	/	/	/	/	/	/	/	/	/	Y	/	/	/	/	/	/	/	/	/	/	/	/	/	/	/	/	/	/	/	/	/	/	/	/	/	/	Y	/	/
K01778	/	/	Y	Y	/	Y	Y	Y	Y	Y	/	Y	Y	Y	/	Y	Y	Y	/	Y	Y	Y	Y	/	Y	Y	Y	Y	Y	Y	Y	Y	Y	Y	Y	Y	Y	Y	Y	Y	Y	Y	Y	Y	Y	Y	Y	Y	/
K01779	/	/	/	/	/	/	Y	/	Y	/	Y	/	Y	Y	/	Y	/	/	/	Y	/	Y	/	Y	/	/	/	/	/	Y	/	/	/	/	Y	/	/	/	Y	/	/	/	Y	/	/	Y	Y	/	/
K01781	/	Y	/	/	/	/	/	/	/	/	/	/	/	/	/	/	/	/	/	/	/	/	/	/	/	/	/	/	/	/	/	/	/	/	/	/	/	/	/	/	/	/	/	/	/	/	/	/	/
K01782	/	/	/	/	/	/	/	/	/	/	/	/	/	/	/	/	/	/	/	/	/	/	/	/	/	/	/	/	/	/	/	/	/	/	/	/	/	/	/	/	/	/	Y	/	/	/	/	/	/
K01783	Y	Y	Y	Y	/	Y	Y	Y	/	Y	/	Y	Y	Y	Y	Y	Y	Y	Y	Y	Y	Y	Y	Y	/	Y	Y	Y	Y	Y	/	Y	Y	Y	Y	Y	Y	Y	Y	Y	Y	Y	Y	Y	Y	Y	Y	/	Y
K01784	/	Y	Y	Y	/	Y	/	Y	Y	Y	Y	Y	Y	Y	Y	Y	Y	Y	Y	Y	Y	Y	Y	Y	Y	Y	Y	/	Y	Y	Y	Y	Y	Y	Y	Y	Y	Y	Y	Y	Y	Y	Y	Y	Y	Y	Y	Y	Y
K01785	/	Y	/	/	/	/	/	Y	Y	Y	/	/	/	Y	/	Y	/	/	/	/	Y	Y	/	/	/	Y	Y	/	Y	Y	/	/	Y	Y	/	Y	Y	/	/	/	Y	/	Y	/	/	/	/	/	Y
K01786	/	/	/	/	/	/	/	/	/	/	/	/	/	/	/	/	/	/	/	/	/	/	/	/	/	/	/	/	/	/	/	/	/	/	/	/	/	/	/	/	/	/	/	/	/	/	/	/	/
K01787	/	/	/	/	/	/	/	/	/	/	/	Y	/	/	/	/	/	/	/	/	/	/	/	Y	/	/	Y	/	Y	/	/	/	/	/	/	Y	Y	/	/	/	Y	/	/	/	Y	/	/	Y	/
K01788	/	/	/	/	/	/	/	/	/	Y	/	/	/	/	/	/	/	/	/	/	/	/	/	/	/	Y	/	/	Y	/	/	/	/	/	/	/	/	/	/	/	/	/	/	/	/	/	/	/	/
K01790	/	Y	Y	/	/	/	/	/	/	/	/	Y	/	Y	/	/	Y	Y	/	/	/	Y	Y	Y	/	/	Y	Y	/	/	Y	/	Y	/	Y	/	Y	/	Y	Y	Y	/	/	Y	/	Y	/	Y	/
K01791	/	Y	Y	Y	Y	/	Y	/	/	Y	/	Y	/	Y	Y	/	Y	Y	Y	Y	/	Y	/	/	Y	Y	Y	Y	Y	Y	/	/	/	Y	Y	Y	/	Y	/	Y	Y	Y	/	/	Y	/	Y	Y	Y
K01792	/	/	/	/	/	/	/	/	/	/	/	/	/	/	/	/	/	/	/	/	Y	/	/	Y	/	/	/	/	/	/	/	/	/	/	/	/	/	/	/	/	/	/	Y	/	/	/	/	/	/
K01793	/	/	/	/	/	/	/	/	/	/	/	/	/	/	/	/	/	/	/	/	/	/	/	/	/	/	/	/	/	/	/	/	/	/	/	/	/	/	/	/	/	/	/	/	/	/	/	/	/
K01794	/	/	/	/	/	/	/	/	/	/	/	/	/	/	/	/	/	/	/	/	/	/	/	/	/	/	/	/	/	/	/	/	/	/	/	/	/	/	/	/	/	/	/	/	/	/	/	/	/
K01795	/	/	/	/	/	/	/	/	/	/	/	/	/	/	/	/	/	/	/	/	/	/	/	/	/	/	/	/	/	/	/	/	/	/	/	/	/	/	/	/	/	/	/	/	/	/	/	/	/
K01796	/	/	/	/	/	/	/	/	/	/	/	/	/	/	/	/	/	/	/	/	/	/	/	/	/	/	/	/	/	/	/	/	/	/	/	/	/	/	/	/	/	/	/	/	/	/	/	/	/
K01799	/	/	/	/	/	/	/	/	/	/	/	/	/	/	/	/	/	/	/	/	/	/	/	/	/	/	/	/	/	/	/	/	/	/	/	/	/	/	/	/	/	/	/	/	/	/	/	/	/
K01800	/	/	/	/	/	/	/	/	/	/	/	/	/	/	/	/	/	/	/	/	/	/	/	/	/	/	/	/	/	/	/	/	/	/	/	/	/	/	/	/	/	/	/	/	/	/	/	/	/
K01801	/	/	/	/	/	/	/	/	/	/	/	/	/	/	/	/	/	/	/	/	/	/	/	/	/	/	/	/	/	/	/	/	/	/	/	/	/	/	/	/	/	/	/	/	/	/	/	/	/
K01802	/	/	/	/	/	/	/	Y	Y	/	/	Y	/	/	/	/	/	/	/	/	/	/	Y	/	/	/	/	/	/	Y	Y	/	/	/	/	/	/	/	/	/	/	/	Y	Y	/	Y	/	/	/
K01803	Y	Y	/	Y	Y	Y	Y	Y	/	Y	Y	Y	Y	Y	/	Y	Y	Y	/	Y	Y	Y	Y	Y	Y	Y	Y	Y	Y	Y	Y	Y	Y	Y	Y	Y	Y	Y	Y	Y	Y	Y	Y	Y	Y	Y	Y	Y	/
K01804	/	/	/	/	/	/	/	Y	/	Y	/	Y	/	Y	/	Y	Y	/	Y	/	Y	/	/	/	/	/	Y	/	/	/	/	/	Y	/	/	Y	Y	/	/	/	Y	/	Y	/	/	/	/	Y	Y
K01805	/	Y	Y	/	/	/	/	/	/	/	/	Y	/	/	/	/	Y	/	Y	/	Y	Y	/	/	/	/	Y	/	Y	Y	/	/	Y	Y	Y	Y	Y	/	/	/	Y	/	Y	/	Y	/	/	Y	/
K01807	/	Y	/	/	/	/	/	/	/	/	/	/	/	/	/	/	/	/	/	/	/	/	/	Y	/	/	/	/	/	/	Y	/	/	/	/	/	/	/	/	/	/	/	/	/	/	/	/	/	/
K01808	Y	/	Y	Y	Y	Y	Y	Y	Y	Y	Y	Y	Y	Y	Y	Y	Y	Y	Y	/	Y	Y	Y	/	Y	Y	Y	Y	Y	/	/	Y	Y	Y	Y	Y	Y	Y	Y	Y	Y	Y	Y	Y	Y	Y	/	/	Y
K01809	/	Y	/	/	/	/	/	Y	/	Y	/	Y	/	/	/	Y	Y	Y	/	/	Y	Y	/	Y	Y	Y	Y	Y	Y	Y	/	/	Y	/	/	Y	Y	Y	/	/	Y	Y	/	Y	/	Y	/	/	/
K01810	Y	/	/	Y	/	Y	Y	Y	/	Y	Y	Y	Y	Y	Y	Y	/	Y	/	Y	Y	Y	Y	Y	Y	Y	Y	/	Y	Y	/	/	Y	Y	Y	Y	Y	Y	Y	Y	Y	Y	Y	/	Y	/	Y	/	Y
K01811	/	Y	/	/	/	/	/	/	/	/	/	/	/	/	/	/	/	/	/	/	/	/	/	Y	/	/	/	/	/	/	/	/	Y	Y	/	/	Y	/	/	/	Y	/	Y	/	/	/	/	/	Y
K01812	/	/	/	/	/	/	/	/	/	/	/	/	/	/	/	Y	/	/	/	/	Y	Y	/	Y	/	Y	Y	/	/	/	/	/	/	Y	/	/	Y	/	/	/	/	/	Y	/	/	/	/	/	/
K01813	/	/	/	/	/	/	/	/	Y	Y	/	/	/	/	/	Y	/	/	/	/	/	Y	/	Y	/	/	Y	/	/	/	/	/	Y	/	/	/	Y	/	/	/	Y	/	/	/	/	/	/	/	Y
K01814	/	Y	Y	/	Y	/	Y	/	/	Y	/	Y	Y	Y	Y	Y	Y	/	Y	Y	/	Y	Y	Y	/	/	Y	Y	/	Y	Y	Y	Y	Y	Y	/	Y	/	/	Y	Y	/	/	Y	Y	/	Y	Y	Y
K01815	/	/	/	/	/	/	/	/	/	/	/	/	/	Y	/	/	/	/	/	/	Y	/	/	/	/	/	/	/	/	Y	/	/	/	/	/	/	Y	/	/	/	/	/	/	/	/	/	/	/	/
K01816	/	Y	/	/	/	/	/	/	/	Y	/	Y	/	Y	/	Y	Y	/	Y	/	/	Y	Y	/	/	/	Y	/	/	/	/	/	Y	/	Y	/	/	/	/	Y	Y	/	/	/	/	/	/	/	/
K01817	/	Y	Y	/	/	/	/	/	/	/	/	Y	Y	Y	Y	/	Y	/	Y	/	/	Y	Y	Y	/	/	Y	/	/	Y	Y	Y	Y	Y	/	/	Y	/	/	/	Y	/	/	/	Y	/	/	Y	/
K01818	/	Y	Y	/	/	/	/	/	Y	Y	/	Y	/	/	/	Y	Y	/	Y	/	/	Y	/	Y	/	/	Y	/	/	/	/	/	Y	/	Y	Y	Y	/	/	/	Y	/	/	/	Y	/	/	/	Y
K01819	/	/	/	/	/	/	/	/	/	/	/	/	/	/	/	/	/	/	/	/	/	/	/	/	/	/	/	/	/	/	/	/	/	/	/	/	/	/	/	/	/	/	/	/	/	/	/	/	/
K01820	/	Y	/	/	/	/	/	/	/	/	/	Y	/	Y	/	/	/	/	/	/	/	/	/	/	/	/	/	/	/	/	/	/	/	/	/	/	/	/	/	/	/	/	/	/	/	/	/	/	/
K01821	/	/	/	/	/	/	/	/	Y	Y	Y	/	/	Y	Y	/	Y	/	/	Y	/	/	Y	/	/	/	/	Y	/	Y	/	/	/	Y	Y	/	/	/	/	Y	/	/	/	/	/	Y	Y	/	/
K01822	/	/	/	/	/	/	/	/	/	/	/	/	/	/	/	/	/	/	/	/	/	/	/	/	/	/	/	/	/	/	/	/	/	/	/	/	/	/	/	/	/	/	/	/	/	/	/	/	/
K01823	Y	Y	/	/	Y	/	/	Y	/	/	/	/	/	/	Y	/	/	/	Y	/	/	Y	/	Y	/	/	/	Y	/	/	Y	/	/	Y	/	/	Y	/	/	Y	/	/	Y	/	/	/	/	/	/
K01824	/	/	/	/	/	/	/	/	/	/	/	/	/	/	/	/	/	/	/	/	/	/	/	/	/	/	/	/	/	/	/	/	/	/	/	/	/	/	/	/	/	/	/	/	/	/	/	/	/
K01825	/	/	/	/	/	/	/	/	/	/	/	/	/	/	/	/	/	/	/	/	/	/	/	/	/	/	/	/	/	/	/	/	/	/	/	/	/	/	/	/	/	/	/	/	/	/	/	/	/
K01826	/	/	/	/	/	/	/	/	/	/	/	/	/	/	/	/	/	/	/	/	/	/	/	/	/	/	/	/	/	/	/	/	/	/	/	/	/	/	/	/	/	/	/	/	/	/	/	/	/
K01827	/	/	/	/	/	/	/	/	/	/	/	/	/	/	/	/	/	/	/	/	/	/	/	/	/	/	/	/	/	/	/	/	/	/	/	/	/	/	/	/	/	/	/	/	/	/	/	/	/
K01829	/	/	/	/	/	/	/	Y	/	/	/	/	/	/	/	/	/	/	/	/	/	/	/	/	Y	/	/	/	/	/	/	/	/	/	/	Y	Y	Y	/	/	/	/	/	/	/	/	/	/	/
K01830	/	/	/	/	/	/	/	/	/	/	/	/	/	/	/	/	/	/	/	/	/	/	/	/	/	/	/	/	/	/	/	/	/	/	/	/	/	/	/	/	/	/	/	/	/	/	/	/	/
K01831	/	/	/	/	/	/	/	/	/	/	/	/	/	/	/	/	/	/	/	/	/	/	/	/	/	/	/	/	/	/	/	/	/	/	/	/	/	/	/	/	/	/	/	/	/	/	/	/	/
K01832	/	/	/	/	/	/	/	/	/	/	/	/	/	/	/	/	/	/	/	/	/	/	/	/	/	/	/	/	/	/	/	/	/	/	/	/	/	/	/	/	/	/	/	/	/	/	/	/	/
K01833	/	/	/	/	/	/	/	/	/	/	/	/	/	/	/	/	/	/	/	/	/	/	/	/	/	/	/	/	/	/	/	/	/	/	/	/	/	/	/	/	/	/	/	/	/	/	/	/	/
K01834	/	Y	/	/	/	/	/	Y	/	/	/	/	/	/	/	/	/	/	/	/	/	/	Y	Y	Y	/	/	/	Y	/	Y	/	/	Y	/	/	Y	Y	/	Y	Y	Y	Y	/	/	/	Y	/	/
K01835	Y	/	/	/	Y	/	Y	Y	Y	Y	/	/	/	/	Y	Y	/	Y	/	/	/	Y	/	Y	/	Y	Y	Y	Y	Y	/	/	Y	Y	/	Y	Y	/	Y	Y	/	/	Y	Y	/	/	/	/	Y
K01836	/	/	/	/	/	/	/	/	/	/	/	/	/	/	/	/	/	/	/	/	/	/	/	/	/	/	/	/	/	/	/	/	/	/	/	/	/	/	/	/	/	/	/	/	/	/	/	/	/
K01837	/	/	/	/	/	/	/	/	/	/	/	/	/	/	/	/	/	/	/	/	/	/	/	/	/	/	/	/	/	/	/	/	/	/	/	/	/	/	/	/	/	/	/	/	/	/	/	/	/
K01838	/	Y	/	/	/	/	/	/	/	Y	/	Y	Y	Y	/	/	Y	/	/	/	/	Y	/	Y	/	Y	Y	/	Y	/	/	/	Y	Y	/	Y	Y	/	/	/	/	/	/	/	/	/	/	/	/
K01839	Y	/	Y	Y	/	Y	Y	/	Y	Y	/	Y	/	Y	/	Y	/	Y	Y	/	/	/	/	/	/	Y	/	Y	Y	/	/	Y	/	Y	Y	Y	/	/	Y	/	/	/	/	/	Y	/	/	/	/
K01840	/	Y	Y	/	/	Y	/	Y	/	/	/	Y	/	/	/	/	Y	Y	/	/	Y	/	Y	Y	/	/	Y	/	/	/	/	/	Y	/	/	/	Y	Y	/	/	/	Y	Y	Y	/	/	/	/	/
K01841	/	/	/	/	/	/	/	/	/	/	/	/	/	/	/	/	/	/	/	/	/	/	/	/	/	/	/	/	Y	/	/	/	/	/	/	/	/	/	/	/	/	/	/	/	/	/	/	/	/
K01843	Y	/	Y	/	/	/	Y	/	/	Y	Y	Y	Y	/	/	Y	/	Y	Y	Y	/	Y	/	/	/	Y	Y	/	Y	Y	Y	Y	Y	Y	Y	/	/	Y	Y	/	/	Y	Y	Y	/	/	/	Y	/
K01844	Y	/	/	/	/	/	Y	/	/	/	/	/	/	/	/	/	/	/	/	/	/	/	/	/	Y	Y	/	/	Y	/	/	/	/	/	/	/	/	Y	Y	/	/	Y	/	Y	/	/	/	/	/
K01845	/	Y	Y	/	/	/	/	Y	/	Y	/	Y	Y	Y	/	/	/	/	/	/	Y	/	Y	/	/	/	Y	/	/	/	Y	Y	/	/	Y	/	/	/	/	Y	Y	/	/	/	Y	/	/	/	/
K01846	Y	/	/	/	/	/	/	/	/	/	/	/	/	/	/	Y	/	/	/	/	/	/	/	/	/	Y	/	/	Y	/	/	/	/	/	/	Y	/	/	Y	/	/	/	/	Y	/	/	/	/	/
K01847	/	/	/	/	/	/	/	Y	/	/	/	/	/	/	/	/	/	/	/	/	Y	Y	/	/	Y	/	/	/	/	/	/	/	Y	/	/	/	Y	Y	/	/	/	Y	/	Y	/	/	/	/	/
K01848	Y	/	/	/	/	Y	Y	/	/	/	Y	/	Y	/	/	/	/	Y	/	Y	/	/	/	Y	/	/	/	/	/	Y	/	/	/	/	/	/	/	/	/	/	/	/	/	/	/	Y	Y	/	/
K01849	Y	/	/	/	/	Y	Y	/	/	/	Y	/	/	/	/	/	/	Y	/	Y	/	/	/	Y	/	/	/	/	/	Y	/	/	/	/	/	/	/	/	/	/	/	/	/	/	/	Y	Y	/	/
K01850	/	/	/	/	/	/	/	/	/	/	/	/	/	/	/	/	/	/	/	/	/	/	/	/	/	/	/	/	/	/	/	/	/	/	/	/	/	/	/	/	/	/	/	/	/	/	/	/	/
K01851	/	/	/	/	/	/	/	/	/	/	/	/	/	/	/	/	/	/	/	/	/	/	/	/	/	/	/	/	/	/	/	/	/	/	/	/	/	/	/	Y	/	/	/	/	/	/	/	/	/
K01852	/	/	/	/	/	/	/	/	/	/	/	/	/	/	/	/	/	/	/	/	/	/	/	/	/	/	/	/	/	/	/	/	/	/	/	/	/	/	/	/	/	/	/	/	/	/	/	/	/
K01853	/	/	/	/	/	/	/	/	/	/	/	/	/	/	/	/	/	/	/	/	/	/	/	/	/	/	/	/	/	/	/	/	/	/	/	/	/	/	/	/	/	/	/	/	/	/	/	/	/
K01854	/	/	/	/	Y	/	/	/	/	/	/	/	/	Y	/	/	Y	/	/	Y	Y	/	/	/	/	Y	Y	/	/	/	/	/	/	/	Y	/	/	/	/	Y	/	/	/	/	/	/	/	/	Y
K01855	/	/	/	/	/	/	/	/	/	/	/	/	/	/	/	/	/	/	/	/	/	/	/	/	/	/	/	/	/	/	/	/	/	/	/	/	/	/	/	/	/	/	/	/	/	/	/	/	/
K01856	/	/	/	/	/	/	/	/	/	/	/	/	/	/	/	/	/	/	/	/	/	/	/	/	/	/	Y	/	/	/	/	/	/	/	Y	/	/	/	/	/	/	/	/	/	/	/	/	/	/
K01857	/	/	/	/	/	/	/	/	/	/	/	/	/	/	/	/	/	/	/	/	/	/	/	Y	/	/	/	/	/	/	/	/	/	/	/	/	/	/	/	/	/	/	/	/	/	/	/	/	/
K01858	/	/	/	/	/	Y	/	/	/	/	/	/	Y	/	Y	/	/	Y	/	/	Y	/	Y	/	Y	/	Y	/	/	/	Y	/	/	/	/	/	/	/	/	/	/	/	Y	/	/	/	/	/	/
K01859	/	/	/	/	/	/	/	/	/	/	/	/	/	/	/	/	/	/	/	/	/	/	/	/	/	/	/	/	/	/	/	/	/	/	/	/	/	/	/	/	/	/	/	/	/	/	/	/	/
K01860	/	/	/	/	/	/	/	/	/	/	/	/	/	/	/	/	/	/	/	/	/	/	/	/	/	/	/	/	/	/	/	/	/	/	/	/	/	/	/	/	/	/	/	/	/	/	/	/	/
K01865	/	/	/	/	/	/	/	/	/	/	/	/	/	/	/	/	/	/	/	/	/	/	/	/	/	/	/	/	/	/	/	/	/	/	/	/	/	/	/	/	/	/	/	/	/	/	/	/	/
K01866	Y	Y	Y	Y	Y	Y	/	Y	Y	/	Y	Y	Y	Y	/	Y	Y	Y	Y	Y	Y	Y	Y	/	Y	Y	Y	Y	Y	Y	Y	Y	Y	Y	/	Y	Y	Y	Y	Y	Y	Y	/	Y	Y	/	Y	Y	Y
K01867	Y	Y	Y	/	/	Y	Y	Y	/	Y	/	Y	Y	Y	Y	Y	Y	Y	Y	Y	Y	Y	Y	Y	Y	Y	Y	Y	Y	Y	Y	Y	Y	Y	Y	Y	Y	Y	Y	Y	Y	Y	Y	Y	Y	Y	Y	Y	Y
K01868	Y	Y	Y	Y	Y	Y	Y	/	/	Y	Y	Y	Y	Y	/	/	/	Y	Y	Y	Y	Y	Y	/	Y	/	Y	Y	Y	Y	Y	/	Y	Y	/	Y	Y	Y	Y	/	Y	Y	/	Y	Y	Y	Y	Y	Y
K01869	Y	Y	Y	Y	Y	Y	Y	Y	Y	Y	Y	Y	/	Y	Y	/	Y	Y	Y	Y	Y	Y	Y	Y	/	Y	Y	Y	/	/	Y	Y	Y	Y	Y	Y	Y	Y	Y	Y	Y	Y	/	Y	/	Y	Y	Y	Y
K01870	Y	Y	Y	Y	/	Y	/	/	Y	Y	/	/	Y	Y	Y	Y	Y	Y	Y	Y	Y	Y	Y	Y	Y	Y	Y	Y	Y	/	Y	Y	/	Y	/	Y	Y	Y	Y	Y	Y	Y	Y	Y	/	/	Y	Y	Y
K01872	/	Y	Y	Y	Y	Y	Y	Y	Y	Y	Y	Y	Y	Y	/	/	Y	Y	/	Y	/	Y	Y	Y	/	Y	Y	Y	Y	Y	Y	Y	Y	Y	/	Y	Y	Y	Y	Y	Y	/	Y	Y	Y	Y	Y	/	Y
K01873	Y	Y	Y	/	Y	Y	Y	Y	/	Y	Y	Y	/	Y	/	/	Y	Y	/	Y	Y	/	Y	/	Y	Y	Y	Y	Y	Y	/	Y	Y	Y	/	Y	Y	Y	Y	Y	Y	Y	Y	/	Y	/	Y	Y	Y
K01874	Y	Y	Y	Y	/	Y	Y	/	Y	Y	Y	Y	Y	Y	Y	Y	Y	Y	Y	Y	Y	Y	Y	/	Y	Y	Y	Y	Y	Y	/	Y	Y	Y	/	Y	Y	Y	/	/	Y	/	Y	Y	Y	/	Y	Y	Y
K01875	Y	Y	Y	Y	/	Y	Y	Y	Y	Y	Y	Y	Y	Y	Y	Y	Y	Y	Y	Y	Y	Y	Y	/	Y	Y	Y	Y	/	/	/	Y	Y	Y	/	Y	Y	Y	Y	Y	Y	Y	Y	Y	Y	Y	Y	Y	Y
K01876	Y	Y	Y	Y	Y	Y	Y	/	/	Y	Y	Y	Y	/	Y	Y	Y	/	Y	Y	Y	Y	Y	/	Y	Y	Y	Y	Y	Y	Y	Y	/	Y	Y	Y	Y	Y	Y	Y	Y	Y	Y	/	Y	Y	Y	Y	Y
K01878	Y	/	/	Y	/	/	/	/	/	/	/	/	Y	Y	Y	/	Y	/	Y	Y	/	/	Y	/	Y	Y	/	Y	Y	Y	/	Y	/	/	Y	/	/	Y	/	Y	/	Y	/	/	Y	/	Y	/	/
K01879	Y	/	/	/	Y	/	/	/	/	/	/	/	Y	Y	Y	/	Y	/	Y	Y	/	/	Y	/	Y	Y	/	Y	Y	Y	/	/	/	/	Y	/	/	Y	/	Y	/	Y	/	/	/	Y	Y	/	/
K01880	/	/	Y	/	/	Y	Y	Y	/	Y	/	Y	/	/	/	Y	/	Y	/	/	Y	Y	/	/	/	/	Y	/	/	/	Y	/	Y	Y	/	Y	Y	/	Y	/	/	/	Y	Y	/	/	/	/	Y
K01881	Y	Y	Y	Y	Y	Y	Y	Y	Y	/	Y	Y	Y	/	/	Y	Y	Y	Y	Y	Y	Y	/	Y	Y	Y	Y	Y	Y	/	Y	Y	Y	Y	/	/	Y	Y	Y	Y	Y	Y	Y	Y	Y	Y	Y	Y	Y
K01883	Y	Y	Y	Y	Y	Y	Y	Y	/	Y	Y	Y	Y	Y	Y	Y	Y	Y	/	Y	Y	Y	Y	/	Y	Y	Y	Y	Y	Y	/	Y	Y	Y	/	Y	Y	Y	Y	Y	Y	Y	Y	Y	Y	/	Y	Y	Y
K01884	/	/	/	/	/	/	/	/	/	/	/	/	/	/	/	/	/	Y	/	/	/	/	/	/	/	/	/	/	/	/	/	/	/	/	/	/	/	/	/	/	/	/	/	/	Y	/	/	/	/
K01885	/	/	Y	Y	Y	Y	/	Y	/	/	Y	Y	Y	Y	/	/	Y	Y	/	Y	Y	Y	Y	Y	Y	/	Y	Y	Y	Y	Y	/	Y	Y	Y	/	Y	Y	Y	Y	Y	Y	Y	Y	/	Y	Y	Y	Y
K01886	Y	/	Y	Y	/	Y	Y	/	/	Y	Y	Y	/	/	/	/	/	Y	/	Y	Y	Y	Y	Y	Y	Y	Y	/	Y	Y	/	/	Y	Y	/	Y	Y	Y	Y	Y	/	Y	Y	Y	Y	/	Y	Y	Y
K01887	Y	Y	Y	Y	Y	Y	Y	/	/	Y	/	Y	Y	Y	/	/	/	Y	Y	Y	Y	Y	Y	Y	Y	Y	Y	Y	Y	Y	Y	Y	Y	Y	Y	Y	Y	Y	Y	Y	Y	Y	Y	/	Y	Y	Y	Y	Y
K01889	Y	Y	Y	Y	Y	Y	Y	Y	/	Y	/	Y	Y	Y	Y	Y	Y	Y	Y	Y	Y	Y	Y	Y	Y	Y	Y	Y	Y	Y	Y	Y	Y	Y	/	Y	Y	Y	Y	/	Y	Y	Y	Y	Y	/	Y	Y	Y
K01890	Y	Y	Y	Y	Y	Y	/	/	Y	Y	Y	Y	Y	Y	/	Y	/	Y	Y	Y	Y	Y	Y	Y	Y	Y	Y	Y	Y	Y	Y	Y	Y	Y	Y	Y	Y	Y	Y	/	Y	Y	Y	Y	Y	Y	Y	Y	Y
K01892	Y	Y	Y	Y	Y	Y	Y	/	Y	Y	Y	Y	Y	Y	Y	Y	Y	Y	Y	Y	/	Y	Y	Y	Y	Y	Y	Y	Y	Y	Y	Y	Y	Y	Y	Y	Y	Y	Y	Y	Y	Y	Y	Y	Y	Y	Y	Y	Y
K01893	Y	/	/	Y	Y	Y	Y	/	Y	Y	Y	/	Y	/	/	Y	/	Y	/	Y	/	Y	/	/	Y	Y	Y	/	/	Y	/	/	Y	Y	Y	Y	Y	Y	Y	Y	/	Y	/	Y	Y	/	/	/	Y
K01894	/	/	/	/	/	/	/	/	/	/	/	/	/	/	/	/	/	/	/	/	/	/	/	/	/	/	/	/	/	/	/	/	/	/	/	/	/	/	/	/	/	/	/	/	/	/	/	/	/
K01895	/	Y	/	/	/	Y	/	Y	/	/	/	Y	Y	Y	Y	Y	Y	/	/	/	Y	Y	Y	/	Y	/	Y	Y	/	/	Y	Y	Y	Y	/	/	Y	/	/	Y	/	/	Y	/	/	Y	/	Y	Y
K01896	/	/	/	/	/	/	/	/	/	/	/	/	/	/	/	/	/	/	/	/	/	/	/	/	/	/	/	/	/	/	/	/	/	/	/	/	/	/	/	/	/	/	/	/	/	/	/	/	/
K01897	Y	/	/	/	/	Y	/	/	Y	Y	Y	Y	Y	Y	Y	Y	/	Y	/	Y	Y	Y	/	Y	/	/	Y	Y	/	Y	/	Y	Y	Y	Y	/	Y	Y	/	Y	Y	Y	Y	Y	Y	Y	Y	Y	Y
K01899	/	/	/	/	/	/	/	/	/	/	/	/	/	/	/	/	/	/	/	/	/	/	/	/	/	/	/	/	/	/	/	/	/	/	/	/	/	/	/	/	/	/	/	/	/	/	/	/	/
K01900	/	/	/	/	/	/	/	/	/	/	/	/	/	/	/	/	/	/	/	/	/	/	/	/	/	/	/	/	/	/	/	/	/	/	/	/	/	/	/	/	/	/	/	/	/	/	/	/	/
K01902	/	/	Y	Y	/	Y	/	/	Y	/	Y	/	Y	/	/	/	/	Y	/	/	Y	Y	Y	Y	/	/	Y	/	/	Y	/	/	Y	/	/	/	Y	/	/	/	Y	/	Y	Y	/	/	/	Y	/
K01903	/	/	Y	Y	/	Y	/	Y	Y	/	Y	/	Y	/	/	/	/	/	/	/	Y	Y	Y	Y	/	/	Y	/	/	Y	/	/	Y	/	/	/	Y	/	/	/	Y	/	Y	Y	/	/	/	Y	/
K01904	/	/	/	/	/	/	/	/	/	/	/	/	/	/	/	/	/	/	/	/	/	/	/	/	/	/	/	/	/	/	/	/	/	/	/	/	/	/	/	/	/	/	/	/	/	/	/	/	/
K01905	/	/	/	/	/	/	/	/	/	/	/	/	Y	/	/	/	/	/	/	/	/	/	/	/	/	/	/	/	/	/	/	Y	/	/	/	/	/	/	/	/	/	/	/	/	/	/	/	/	/
K01906	/	/	/	/	/	/	/	/	/	/	/	/	/	/	/	/	/	/	/	/	/	/	Y	/	/	/	/	/	/	/	/	/	/	/	/	/	/	/	/	/	/	/	/	/	/	/	/	/	/
K01907	/	/	/	/	/	/	/	/	/	/	/	/	/	/	/	/	/	/	/	/	/	/	/	/	/	/	/	/	/	/	/	/	/	/	/	/	/	/	/	/	/	/	/	/	/	/	/	/	/
K01908	/	/	/	/	/	/	/	/	/	/	/	/	Y	/	/	/	/	/	/	/	/	/	/	/	/	/	/	/	/	/	/	/	/	/	/	/	/	/	/	/	/	/	/	/	/	/	/	/	/
K01909	/	/	/	/	/	/	/	/	/	/	/	/	/	/	/	/	/	/	/	/	/	/	/	/	/	/	Y	/	/	/	/	/	/	/	/	/	/	/	/	/	/	/	/	/	/	/	/	/	/
K01910	/	/	/	/	/	/	Y	/	/	/	/	/	/	/	/	/	/	/	/	Y	/	/	/	/	/	/	/	/	/	Y	/	/	/	/	/	/	/	/	/	/	/	/	/	/	/	/	Y	/	/
K01911	/	/	/	/	/	/	/	/	/	/	/	/	/	/	/	/	/	/	/	/	Y	Y	/	/	/	/	/	/	/	/	/	/	/	/	/	/	/	/	/	/	Y	/	Y	/	/	/	/	/	/
K01912	/	/	Y	/	Y	Y	/	Y	/	Y	/	Y	Y	Y	Y	Y	Y	/	Y	/	/	Y	Y	/	/	/	Y	Y	Y	Y	Y	/	Y	Y	/	Y	/	/	/	Y	Y	/	Y	Y	Y	/	Y	Y	Y
K01914	/	/	/	/	/	/	/	/	/	/	/	/	/	/	/	Y	/	/	/	/	/	Y	/	/	/	/	Y	/	/	/	/	/	Y	Y	/	Y	Y	/	/	/	/	/	/	Y	/	/	/	/	Y
K01915	Y	Y	Y	Y	Y	Y	Y	Y	/	/	Y	Y	Y	Y	/	Y	Y	Y	Y	Y	Y	Y	Y	Y	Y	/	Y	/	/	Y	Y	Y	Y	Y	/	Y	Y	Y	Y	Y	Y	Y	Y	Y	Y	Y	Y	Y	Y
K01916	/	Y	Y	Y	Y	/	Y	/	/	Y	Y	Y	/	Y	/	/	Y	Y	Y	Y	/	/	/	/	/	/	Y	Y	/	/	/	/	Y	/	Y	/	/	Y	/	/	/	Y	/	/	Y	Y	Y	/	/
K01917	/	/	/	/	/	/	/	/	/	/	/	/	/	/	/	/	/	/	/	/	/	/	/	/	/	/	/	/	/	/	/	/	/	/	/	/	/	/	/	/	/	/	/	/	/	/	/	/	/
K01918	/	/	Y	/	Y	Y	Y	/	Y	Y	/	Y	/	Y	/	/	Y	Y	Y	Y	/	Y	Y	Y	Y	/	Y	Y	/	/	/	Y	Y	/	Y	/	Y	Y	/	Y	Y	Y	Y	/	/	Y	Y	/	/
K01919	/	/	/	/	/	/	/	/	/	/	/	/	/	/	/	/	/	/	/	/	/	/	/	/	/	/	/	/	/	/	/	/	/	Y	/	/	/	/	/	/	/	/	/	/	/	/	/	/	/
K01920	/	/	/	/	/	/	/	/	/	/	/	/	/	/	/	/	/	/	/	/	/	/	/	/	/	/	/	/	/	/	/	/	/	/	/	/	/	/	/	/	/	/	/	/	/	/	/	/	/
K01921	Y	Y	Y	Y	Y	Y	Y	Y	Y	Y	Y	Y	Y	Y	/	Y	/	Y	Y	Y	Y	Y	Y	Y	Y	Y	Y	Y	Y	Y	Y	Y	Y	Y	/	Y	Y	/	/	/	Y	Y	Y	Y	Y	Y	Y	Y	Y
K01922	/	/	/	/	/	/	/	/	/	/	/	/	/	/	/	/	/	/	/	/	/	/	/	/	/	/	/	/	/	/	/	/	/	/	/	/	/	/	/	/	/	/	/	/	/	/	/	/	/
K01923	Y	Y	Y	Y	/	Y	Y	/	Y	Y	Y	Y	Y	Y	Y	Y	Y	Y	Y	Y	/	Y	Y	/	/	Y	/	Y	Y	Y	Y	Y	Y	Y	Y	Y	Y	Y	/	/	Y	Y	Y	Y	Y	Y	Y	Y	Y
K01924	Y	Y	Y	Y	Y	Y	Y	/	Y	Y	Y	Y	Y	Y	/	/	Y	Y	Y	Y	Y	Y	Y	Y	/	Y	Y	Y	Y	Y	/	Y	/	Y	/	Y	Y	Y	/	Y	Y	Y	Y	Y	Y	Y	Y	Y	Y
K01925	Y	Y	Y	Y	/	Y	Y	Y	Y	Y	/	Y	Y	Y	Y	/	Y	Y	/	Y	Y	Y	Y	/	Y	Y	Y	Y	Y	/	/	Y	Y	Y	Y	Y	Y	Y	/	Y	Y	Y	Y	Y	Y	Y	Y	Y	Y
K01926	Y	Y	/	/	Y	/	Y	/	/	Y	Y	Y	Y	Y	Y	/	Y	Y	Y	Y	/	/	/	Y	/	Y	Y	/	Y	Y	/	Y	Y	Y	Y	/	Y	/	/	Y	Y	Y	/	/	/	Y	Y	Y	Y
K01928	Y	Y	Y	Y	Y	/	Y	Y	Y	Y	Y	Y	Y	Y	/	Y	Y	Y	/	Y	Y	Y	Y	Y	/	Y	Y	Y	Y	/	/	Y	Y	Y	Y	Y	Y	/	/	Y	Y	/	/	Y	Y	Y	Y	Y	Y
K01929	Y	Y	Y	Y	/	Y	Y	Y	/	Y	Y	Y	Y	Y	Y	Y	Y	Y	Y	Y	Y	Y	Y	Y	/	Y	Y	Y	Y	/	/	Y	Y	Y	/	Y	Y	/	/	Y	Y	/	Y	Y	Y	/	Y	Y	Y
K01930	/	/	/	/	/	/	/	/	/	/	/	/	/	/	/	/	/	/	/	/	/	/	/	/	/	/	/	/	/	/	/	/	/	/	/	/	/	/	/	/	/	/	/	/	/	/	/	/	/
K01931	/	/	/	/	/	/	/	/	/	/	/	/	/	/	/	/	/	/	/	/	/	/	/	/	/	/	/	/	/	/	/	/	/	/	/	/	/	/	/	/	/	/	/	/	/	/	/	/	/
K01933	Y	Y	Y	Y	/	Y	Y	Y	Y	Y	Y	Y	Y	Y	Y	/	Y	Y	Y	Y	Y	Y	Y	Y	Y	/	Y	Y	Y	Y	Y	Y	Y	Y	Y	/	Y	Y	/	Y	Y	Y	Y	Y	Y	Y	Y	Y	Y
K01934	/	/	/	/	Y	/	Y	Y	/	/	Y	/	/	Y	/	/	/	/	Y	/	Y	Y	Y	/	/	Y	Y	/	/	/	/	Y	/	Y	/	/	Y	/	Y	Y	Y	/	Y	/	/	/	/	/	/
K01935	/	/	/	/	/	/	/	/	/	/	/	/	/	/	/	/	/	/	/	/	/	/	Y	/	/	/	Y	/	/	/	/	/	/	/	/	/	/	/	/	Y	/	/	/	/	/	/	/	/	/
K01937	Y	Y	Y	Y	Y	/	Y	Y	/	Y	Y	Y	Y	Y	/	Y	Y	Y	Y	Y	Y	/	Y	/	Y	Y	Y	Y	Y	Y	Y	Y	Y	Y	/	/	Y	Y	Y	/	Y	Y	Y	/	Y	Y	Y	/	Y
K01938	Y	/	Y	Y	/	/	Y	/	/	Y	/	Y	Y	Y	/	Y	Y	Y	Y	Y	/	Y	Y	/	/	Y	Y	Y	Y	Y	/	Y	/	Y	/	Y	Y	Y	Y	/	Y	Y	Y	Y	Y	Y	Y	Y	Y
K01939	/	Y	Y	/	/	Y	/	Y	Y	/	/	Y	Y	Y	Y	Y	Y	Y	/	Y	/	Y	Y	Y	/	Y	Y	/	Y	Y	/	Y	Y	Y	Y	Y	Y	Y	Y	Y	Y	Y	Y	Y	Y	Y	Y	Y	Y
K01940	/	Y	Y	/	/	/	/	Y	/	/	/	Y	Y	Y	/	/	Y	/	Y	Y	/	Y	Y	Y	/	/	Y	/	/	Y	Y	Y	Y	Y	Y	/	Y	/	/	Y	Y	/	Y	/	Y	/	Y	Y	Y
K01941	/	/	/	/	/	/	/	/	/	/	/	/	/	/	/	/	/	/	/	/	/	/	/	/	/	/	/	/	/	/	/	/	/	/	/	/	/	/	/	/	/	/	/	/	/	/	/	/	/
K01942	/	/	/	/	/	/	/	/	/	/	/	/	/	/	/	/	/	/	/	/	/	/	/	/	/	/	/	/	/	/	/	/	/	/	/	/	/	/	/	/	/	/	/	/	/	/	/	/	/
K01945	Y	Y	Y	/	/	Y	Y	Y	Y	Y	Y	Y	Y	Y	Y	/	Y	Y	/	Y	/	Y	Y	Y	Y	Y	Y	Y	Y	Y	Y	Y	Y	Y	Y	Y	Y	Y	/	Y	Y	Y	Y	Y	Y	Y	Y	Y	Y
K01946	/	/	/	/	/	/	/	/	/	/	/	/	/	/	/	/	/	/	/	/	/	/	/	/	/	/	/	/	/	/	/	/	/	/	/	/	/	/	/	/	/	/	/	/	/	/	/	/	/
K01947	/	/	/	/	/	/	/	/	/	/	/	/	/	/	/	/	/	/	/	/	/	/	/	/	/	/	/	/	/	/	/	/	/	/	/	/	/	/	/	/	/	/	/	/	/	/	/	/	/
K01948	/	/	/	/	/	/	/	/	/	/	/	/	/	/	/	/	/	/	/	/	/	/	/	/	/	/	/	/	/	/	/	/	/	/	/	/	/	/	/	/	/	/	/	/	/	/	/	/	/
K01950	/	Y	/	/	Y	Y	/	Y	/	/	/	Y	Y	/	/	/	/	/	Y	/	/	Y	Y	Y	/	Y	Y	/	Y	Y	/	Y	Y	Y	/	Y	Y	/	Y	Y	Y	/	/	Y	Y	/	/	/	Y
K01951	Y	Y	Y	Y	Y	Y	Y	Y	Y	/	/	Y	Y	Y	Y	Y	Y	Y	Y	Y	Y	Y	Y	Y	Y	/	Y	Y	Y	Y	Y	Y	Y	Y	Y	Y	Y	Y	Y	Y	Y	Y	Y	Y	Y	Y	Y	Y	Y
K01952	Y	Y	Y	Y	Y	Y	Y	/	Y	Y	/	Y	Y	Y	Y	/	Y	Y	Y	Y	Y	Y	Y	Y	Y	Y	Y	Y	Y	Y	Y	Y	Y	Y	Y	Y	Y	Y	/	Y	Y	Y	Y	/	Y	/	Y	Y	Y
K01953	Y	/	Y	/	/	/	/	/	/	/	/	Y	Y	/	Y	/	Y	/	/	/	/	Y	/	/	Y	/	Y	Y	/	/	Y	/	Y	Y	/	/	Y	Y	/	Y	/	Y	/	/	/	Y	/	/	/
K01954	/	/	/	/	/	/	/	/	/	/	/	/	/	/	/	/	/	/	/	/	/	/	/	/	/	/	/	/	/	/	/	/	/	/	/	/	/	/	/	/	/	/	/	/	/	/	/	/	/
K01955	/	Y	Y	/	/	/	/	Y	/	/	/	Y	Y	Y	Y	Y	Y	/	/	Y	Y	Y	Y	Y	Y	/	Y	Y	/	/	Y	Y	Y	Y	/	/	/	Y	/	Y	Y	Y	Y	Y	Y	/	/	/	Y
K01956	/	Y	Y	/	/	/	/	Y	/	Y	/	Y	Y	Y	/	Y	Y	/	Y	Y	Y	Y	Y	Y	/	/	Y	Y	/	Y	Y	Y	Y	Y	Y	/	/	/	/	Y	Y	/	Y	Y	Y	/	Y	Y	Y
K01958	/	/	/	/	/	/	/	/	/	/	/	/	/	/	/	/	/	/	/	/	/	/	/	/	/	/	/	/	/	/	/	/	/	/	/	/	/	/	/	Y	/	/	/	/	/	/	/	/	/
K01959	/	/	/	/	/	/	/	/	/	/	/	/	/	/	/	/	/	/	/	/	/	/	Y	/	/	/	/	/	/	/	Y	/	/	/	/	/	/	/	/	/	/	/	/	/	/	/	/	/	/
K01960	/	/	/	Y	/	Y	/	/	/	/	/	/	Y	/	/	/	/	/	/	/	/	Y	Y	/	Y	/	/	/	/	/	Y	/	Y	/	/	/	Y	Y	/	/	/	/	Y	/	/	/	/	/	/
K01961	Y	/	Y	Y	/	/	/	/	Y	Y	/	Y	/	Y	Y	/	Y	/	/	/	/	Y	Y	Y	/	/	Y	/	Y	/	/	/	Y	/	Y	/	/	/	Y	/	Y	/	/	/	/	Y	/	Y	Y
K01962	Y	/	Y	Y	/	/	/	/	/	Y	/	Y	/	/	/	/	Y	/	Y	/	/	/	Y	/	/	Y	Y	/	Y	/	/	/	/	/	/	Y	/	/	Y	/	Y	/	/	/	/	/	/	Y	/
K01963	Y	/	Y	Y	Y	/	/	/	/	/	/	Y	/	/	/	/	Y	/	Y	/	/	/	Y	/	/	Y	Y	/	Y	/	/	/	/	/	/	Y	/	/	Y	/	Y	/	/	/	/	Y	/	Y	/
K01964	/	/	/	/	/	/	/	/	/	/	/	/	/	/	/	/	/	/	/	/	/	/	/	/	/	/	/	/	/	/	/	/	/	/	/	/	/	/	/	/	/	/	/	/	/	/	/	/	/
K01965	/	/	/	/	/	/	/	/	/	/	/	/	/	/	/	/	/	/	/	/	/	/	/	/	/	/	/	/	/	/	/	/	/	/	/	/	/	/	/	/	/	/	/	/	/	/	/	/	/
K01966	Y	Y	/	/	Y	Y	Y	/	/	/	/	/	Y	/	/	Y	/	Y	/	Y	Y	Y	/	Y	Y	/	/	Y	/	Y	/	Y	Y	Y	/	/	Y	Y	/	/	/	Y	/	Y	Y	/	Y	/	Y
K01968	/	/	/	/	/	/	/	/	/	/	/	/	/	/	/	/	/	/	/	/	/	Y	/	/	/	/	/	/	/	/	/	/	/	/	/	/	/	/	/	/	/	/	/	/	/	/	/	/	/
K01969	/	/	/	/	/	/	/	/	/	/	/	/	/	/	/	/	/	/	/	/	/	Y	/	/	/	/	/	/	/	/	/	/	/	/	/	/	/	/	/	/	/	/	/	/	/	/	/	/	/
K01971	Y	/	Y	/	Y	/	Y	Y	/	Y	/	Y	/	/	Y	/	Y	/	/	/	Y	/	/	Y	/	Y	/	Y	Y	/	/	Y	/	Y	/	/	/	/	/	/	/	/	Y	/	/	/	/	/	/
K01972	Y	Y	Y	Y	/	Y	Y	Y	/	Y	Y	Y	Y	Y	/	/	Y	Y	Y	Y	/	Y	Y	Y	/	Y	Y	Y	Y	/	/	Y	Y	Y	Y	Y	Y	Y	Y	Y	Y	Y	Y	Y	Y	/	Y	Y	/
K01973	/	/	/	/	/	/	/	/	/	/	/	/	/	/	/	/	/	/	/	/	/	/	/	/	/	/	/	/	/	/	/	/	/	/	/	/	/	/	/	/	/	/	/	/	/	/	/	/	/
K01974	/	Y	Y	/	/	/	/	/	/	/	/	Y	Y	Y	/	/	/	/	Y	/	/	/	/	Y	/	/	Y	/	/	/	Y	/	/	/	/	/	/	/	/	/	/	/	/	/	/	/	/	/	/
K01975	Y	Y	Y	/	Y	Y	Y	/	Y	Y	Y	Y	Y	Y	/	/	Y	Y	Y	Y	Y	Y	Y	Y	Y	/	Y	Y	/	Y	/	Y	Y	Y	Y	Y	/	Y	/	Y	Y	Y	Y	/	/	/	Y	Y	/
K01988	/	/	/	/	/	/	/	/	/	/	/	/	/	/	/	/	/	/	/	/	/	/	/	/	/	/	/	/	/	/	/	/	/	/	/	/	/	/	/	/	/	/	/	/	/	/	/	/	/
K01989	/	/	/	/	/	/	/	/	Y	Y	/	/	/	/	/	Y	/	/	/	/	Y	/	/	/	/	/	/	Y	/	/	/	/	/	/	/	Y	/	/	/	/	/	/	Y	/	Y	/	/	/	/
K01990	Y	Y	Y	Y	Y	Y	Y	Y	Y	Y	Y	Y	Y	Y	Y	Y	Y	Y	Y	/	Y	Y	Y	Y	Y	Y	Y	Y	Y	Y	Y	Y	Y	Y	Y	Y	Y	Y	Y	Y	Y	Y	Y	Y	Y	Y	Y	Y	Y
K01991	/	/	Y	/	/	/	/	/	/	/	/	Y	Y	/	/	/	/	/	/	/	/	Y	/	/	/	/	Y	/	/	/	/	/	Y	/	/	/	/	/	/	Y	/	/	/	/	/	/	/	/	/
K01992	Y	Y	Y	Y	/	Y	Y	Y	Y	Y	Y	Y	Y	Y	Y	Y	Y	Y	Y	/	Y	Y	Y	Y	Y	Y	Y	Y	Y	Y	Y	Y	Y	Y	Y	Y	Y	Y	Y	Y	Y	Y	Y	Y	Y	Y	Y	Y	Y
K01993	/	/	/	/	/	Y	/	/	Y	/	/	/	Y	/	/	/	/	Y	/	/	/	/	Y	/	/	/	Y	/	/	/	/	Y	Y	/	/	/	/	/	/	Y	Y	/	/	/	/	/	Y	/	/
K01994	/	/	/	/	/	/	/	/	/	/	/	/	/	/	/	/	/	/	/	/	/	/	/	/	/	/	/	/	/	/	/	/	/	/	/	/	/	/	/	/	/	/	/	/	/	/	/	/	/
K01995	Y	Y	Y	/	Y	Y	Y	Y	/	Y	Y	Y	Y	Y	Y	Y	Y	/	/	Y	Y	/	Y	Y	/	Y	/	Y	Y	Y	/	Y	/	Y	Y	Y	/	/	/	Y	Y	/	/	/	Y	/	Y	Y	/
K01996	Y	Y	Y	/	/	Y	Y	Y	/	Y	Y	Y	Y	Y	/	Y	Y	/	Y	Y	Y	/	Y	Y	/	Y	/	Y	Y	Y	/	Y	/	Y	Y	Y	/	/	/	Y	Y	/	/	/	Y	/	Y	Y	/
K01997	Y	Y	Y	/	Y	Y	Y	Y	/	Y	Y	Y	Y	Y	Y	Y	Y	/	Y	Y	Y	/	Y	Y	/	Y	Y	Y	Y	Y	/	Y	/	Y	/	Y	/	/	/	Y	Y	/	/	/	Y	/	Y	Y	/
K01998	Y	Y	Y	/	Y	/	Y	/	/	/	Y	Y	Y	Y	Y	Y	Y	/	Y	Y	Y	/	Y	Y	/	Y	/	Y	Y	Y	/	Y	/	Y	Y	Y	/	/	/	Y	Y	/	/	/	Y	/	Y	/	/
K01999	/	/	Y	/	Y	Y	Y	/	/	Y	Y	Y	Y	Y	Y	Y	Y	/	Y	Y	Y	/	Y	Y	/	Y	Y	Y	Y	Y	Y	Y	/	Y	/	Y	/	/	/	Y	Y	/	/	/	Y	/	Y	Y	/
K02000	/	/	/	/	Y	/	/	/	/	/	Y	/	/	/	Y	/	/	/	/	Y	/	/	/	/	/	/	/	Y	/	Y	/	/	/	/	/	/	/	/	/	/	/	/	/	/	/	/	Y	/	Y
K02001	/	/	/	/	Y	/	/	/	/	/	/	/	/	/	Y	/	/	/	/	Y	/	/	/	/	/	/	/	Y	/	Y	/	/	/	/	/	/	/	/	/	/	/	/	/	/	/	/	/	/	/
K02002	/	/	/	/	Y	/	/	/	/	/	Y	/	/	/	Y	/	/	/	/	Y	/	/	/	/	/	/	/	Y	/	Y	/	/	/	/	/	/	/	/	/	/	/	/	/	/	/	/	Y	/	Y
K02003	Y	Y	Y	Y	Y	Y	Y	Y	Y	Y	Y	Y	Y	Y	Y	Y	Y	Y	Y	Y	Y	Y	Y	Y	Y	Y	Y	Y	Y	Y	Y	Y	Y	Y	Y	/	Y	Y	/	Y	Y	Y	Y	Y	Y	Y	Y	Y	Y
K02004	/	Y	Y	Y	Y	Y	Y	Y	Y	Y	Y	Y	Y	Y	/	Y	Y	Y	Y	Y	/	Y	Y	Y	Y	Y	Y	Y	Y	Y	Y	Y	Y	Y	Y	/	/	Y	/	Y	Y	Y	Y	Y	Y	Y	Y	Y	Y
K02005	/	Y	Y	/	Y	Y	/	Y	Y	/	/	Y	Y	Y	Y	/	Y	Y	/	Y	/	/	Y	Y	Y	/	Y	Y	/	Y	/	Y	Y	Y	/	/	/	Y	/	Y	Y	Y	/	/	/	Y	Y	/	/
K02006	Y	Y	/	/	/	Y	/	/	Y	/	/	Y	/	Y	/	/	/	/	/	/	/	/	Y	Y	/	/	/	/	/	/	Y	Y	/	/	Y	/	/	/	/	Y	/	/	/	/	/	Y	Y	/	Y
K02007	/	Y	/	/	/	Y	/	/	/	/	/	Y	Y	Y	/	/	/	/	/	/	/	/	Y	/	/	/	/	/	/	/	Y	Y	/	/	Y	/	/	/	/	Y	/	/	/	/	/	/	/	/	/
K02008	/	Y	/	/	/	Y	/	/	/	/	/	Y	/	Y	/	/	/	/	/	/	/	/	Y	Y	/	/	/	/	/	/	Y	Y	/	/	/	/	/	/	/	Y	/	/	/	/	/	/	Y	/	Y
K02009	/	Y	/	/	/	/	/	/	/	/	/	/	Y	Y	/	/	/	/	/	/	/	/	Y	/	/	/	/	/	/	/	Y	/	/	/	/	/	/	/	/	Y	/	/	/	/	/	/	/	/	/
K02010	/	/	/	/	/	/	/	/	/	Y	/	/	/	/	/	/	/	/	/	/	/	/	Y	Y	/	Y	/	/	Y	Y	/	/	/	/	/	/	/	/	/	/	/	/	Y	/	/	/	/	/	/
K02011	/	/	/	/	/	/	/	/	/	Y	/	/	/	/	/	/	/	/	/	/	/	/	/	Y	/	Y	Y	/	Y	Y	/	/	/	/	/	Y	/	/	/	/	Y	/	Y	/	/	/	/	/	/
K02012	/	/	/	/	/	/	/	/	/	/	/	/	/	/	/	/	Y	/	/	/	/	/	Y	Y	/	Y	Y	/	Y	Y	/	/	/	/	/	Y	/	/	/	/	Y	/	/	/	/	/	/	/	/
K02013	Y	/	Y	/	/	/	Y	Y	Y	Y	Y	Y	Y	Y	Y	Y	Y	Y	Y	Y	Y	Y	Y	/	Y	Y	Y	Y	Y	/	Y	Y	Y	Y	Y	Y	Y	Y	/	Y	Y	Y	Y	Y	Y	/	Y	Y	/
K02014	/	/	/	/	Y	/	/	/	Y	/	/	/	/	/	/	/	/	/	/	Y	/	Y	Y	/	Y	/	Y	/	/	/	/	/	Y	/	/	/	Y	/	/	Y	/	/	/	Y	/	/	Y	/	/
K02015	Y	/	Y	/	/	Y	Y	/	Y	Y	Y	Y	Y	Y	Y	Y	Y	Y	Y	Y	Y	Y	Y	/	Y	Y	Y	Y	Y	/	Y	Y	Y	Y	/	Y	Y	Y	/	Y	Y	Y	Y	Y	Y	/	Y	Y	/
K02016	Y	/	Y	/	Y	/	Y	/	/	Y	Y	Y	Y	Y	Y	Y	Y	/	Y	Y	Y	Y	Y	/	Y	Y	Y	Y	Y	/	Y	Y	Y	Y	Y	Y	Y	Y	/	Y	Y	Y	Y	Y	Y	/	Y	Y	/
K02017	/	/	/	/	/	Y	/	/	/	/	/	/	Y	/	Y	/	/	/	/	Y	/	/	Y	Y	/	/	/	/	/	Y	Y	/	/	/	Y	/	/	/	/	Y	/	/	/	/	/	/	/	/	/
K02018	/	/	/	/	/	Y	/	/	/	/	/	/	Y	/	Y	/	/	/	Y	Y	/	/	Y	Y	/	/	/	Y	/	Y	Y	Y	/	/	Y	/	/	/	/	Y	/	/	Y	/	/	/	/	/	/
K02019	/	/	/	/	Y	/	/	/	/	/	Y	/	Y	/	Y	/	/	/	/	/	/	/	Y	/	/	/	/	Y	/	/	/	Y	/	/	/	/	/	/	/	Y	/	/	/	/	/	/	Y	/	/
K02020	/	/	/	/	/	Y	/	/	/	/	/	/	Y	/	Y	/	/	/	/	Y	/	/	Y	Y	/	/	/	Y	/	Y	Y	Y	/	/	/	/	/	/	/	Y	/	/	/	/	/	/	/	/	/
K02021	/	/	/	/	/	/	/	/	/	/	/	/	Y	/	/	/	/	/	/	/	/	/	/	/	/	/	/	/	/	/	/	/	/	/	/	/	/	/	/	Y	/	/	Y	/	/	/	/	/	/
K02022	/	/	/	/	/	/	/	/	/	/	/	/	/	/	/	/	/	/	/	/	/	/	/	/	/	/	/	/	/	/	/	/	Y	/	/	/	/	/	/	/	/	/	/	Y	/	/	/	/	/
K02024	/	/	/	/	/	/	/	/	/	/	/	/	/	/	/	/	/	/	/	/	/	/	/	/	/	/	/	/	/	/	/	/	/	/	/	/	/	/	/	/	/	/	/	/	/	/	/	/	/
K02025	/	Y	Y	/	/	Y	/	Y	/	Y	/	Y	Y	Y	/	/	Y	Y	Y	/	Y	/	/	Y	Y	Y	/	/	Y	/	/	/	/	Y	/	Y	/	Y	Y	/	Y	Y	Y	/	Y	/	/	Y	Y
K02026	/	Y	Y	/	/	Y	/	Y	/	Y	/	Y	Y	Y	/	Y	Y	Y	Y	/	Y	/	/	Y	Y	Y	/	/	Y	/	/	/	/	Y	/	Y	/	Y	Y	/	Y	/	Y	/	Y	/	/	Y	Y
K02027	Y	Y	Y	/	/	/	Y	/	/	Y	/	Y	/	Y	/	/	/	Y	Y	/	Y	/	/	Y	Y	Y	/	Y	Y	/	/	/	/	/	Y	Y	/	Y	Y	/	Y	Y	Y	/	Y	/	/	Y	Y
K02028	Y	Y	/	/	Y	/	/	Y	/	Y	Y	/	Y	/	Y	Y	/	/	/	/	Y	/	Y	Y	/	Y	/	Y	Y	Y	/	/	/	Y	/	Y	/	/	Y	Y	/	Y	Y	Y	Y	/	Y	/	Y
K02029	Y	/	/	/	Y	/	/	/	/	Y	Y	/	Y	/	Y	Y	/	/	/	/	Y	/	Y	Y	/	Y	/	Y	Y	Y	/	/	/	Y	/	Y	/	/	Y	Y	/	Y	Y	Y	Y	/	/	/	Y
K02030	Y	Y	/	/	Y	/	Y	/	/	Y	Y	/	Y	/	Y	Y	/	Y	/	Y	Y	/	Y	Y	Y	Y	Y	Y	Y	Y	/	/	/	Y	/	Y	/	/	Y	Y	/	Y	Y	/	Y	Y	/	/	Y
K02031	Y	Y	/	/	/	/	Y	Y	/	Y	Y	/	Y	/	/	Y	/	/	/	/	Y	/	Y	Y	/	Y	/	/	Y	Y	Y	/	/	/	/	Y	/	/	Y	Y	/	/	/	/	Y	/	Y	/	Y
K02032	Y	Y	/	Y	/	/	Y	Y	/	Y	Y	/	Y	/	/	Y	/	/	/	Y	Y	/	/	Y	/	Y	/	/	Y	/	/	/	/	/	/	/	/	/	Y	Y	/	/	Y	/	Y	/	/	/	Y
K02033	Y	Y	/	Y	/	/	Y	Y	/	Y	Y	/	Y	/	Y	/	/	/	/	Y	Y	/	Y	Y	/	Y	/	Y	Y	Y	Y	/	/	/	/	Y	/	/	Y	Y	Y	/	Y	/	Y	Y	Y	/	Y
K02034	Y	Y	/	Y	/	/	Y	Y	/	Y	Y	/	Y	/	Y	/	/	/	/	Y	Y	/	Y	Y	/	Y	/	Y	Y	Y	Y	/	/	/	/	Y	/	/	/	Y	Y	/	Y	/	Y	/	Y	/	Y
K02035	Y	Y	/	/	/	Y	Y	Y	/	Y	Y	/	Y	/	Y	/	/	/	/	Y	Y	/	Y	Y	/	Y	/	Y	Y	Y	Y	Y	/	/	/	Y	/	/	Y	Y	Y	/	Y	/	Y	Y	Y	/	Y
K02036	/	Y	Y	Y	/	Y	/	Y	Y	Y	/	Y	Y	Y	Y	Y	Y	Y	Y	Y	Y	/	Y	/	Y	Y	Y	/	/	/	Y	Y	/	Y	Y	/	/	Y	Y	Y	Y	Y	Y	/	Y	Y	Y	Y	Y
K02037	/	Y	Y	Y	/	Y	/	/	Y	/	/	Y	Y	Y	Y	Y	Y	Y	Y	/	Y	/	Y	/	Y	Y	Y	/	/	/	Y	Y	/	Y	/	/	/	Y	Y	Y	Y	Y	Y	/	Y	Y	Y	Y	Y
K02038	/	Y	Y	Y	/	Y	/	Y	Y	/	/	Y	Y	Y	Y	Y	Y	Y	Y	/	Y	/	Y	/	Y	Y	Y	/	/	/	Y	Y	/	Y	/	/	/	Y	Y	Y	Y	Y	Y	/	Y	Y	Y	Y	Y
K02039	/	Y	Y	Y	/	Y	/	Y	Y	Y	/	Y	Y	/	Y	Y	Y	Y	Y	Y	/	/	Y	Y	Y	Y	Y	/	/	Y	Y	Y	/	/	Y	/	/	Y	Y	Y	Y	Y	Y	/	Y	Y	Y	Y	Y
K02040	/	Y	Y	Y	/	Y	/	Y	Y	Y	/	Y	Y	Y	Y	Y	Y	Y	Y	Y	Y	/	Y	/	Y	Y	Y	/	/	Y	Y	Y	Y	Y	Y	/	/	Y	Y	Y	Y	Y	Y	/	Y	Y	/	Y	Y
K02041	/	Y	Y	/	/	/	/	/	/	/	/	Y	Y	/	/	/	/	/	/	/	/	/	Y	/	Y	/	/	/	/	/	/	/	/	/	Y	Y	/	Y	/	/	/	Y	/	/	/	/	/	Y	/
K02042	/	Y	Y	/	Y	/	/	/	/	/	/	Y	Y	/	/	/	/	/	/	/	/	/	Y	/	Y	/	/	/	/	/	/	/	/	/	/	Y	/	Y	/	/	/	Y	/	/	/	/	/	/	/
K02043	/	/	/	/	/	/	/	/	/	/	/	/	/	/	/	/	/	/	/	/	/	/	/	/	/	/	/	/	/	/	/	/	/	/	/	/	/	/	/	/	/	/	/	/	/	/	/	/	/
K02044	/	Y	Y	/	/	/	/	/	/	/	/	Y	Y	/	/	/	/	/	/	/	/	/	Y	/	Y	/	/	/	/	/	/	/	/	/	Y	Y	/	Y	/	Y	/	Y	/	/	/	/	/	Y	/
K02045	/	/	/	/	/	/	/	/	/	/	/	/	/	/	/	/	/	/	/	/	Y	/	/	/	/	/	Y	/	/	/	/	/	/	/	/	/	/	/	/	/	/	/	/	/	/	/	/	/	/
K02046	/	/	/	/	/	/	/	/	/	/	/	/	/	/	/	/	/	/	/	/	Y	/	/	/	/	/	Y	/	/	/	/	/	/	/	/	/	/	/	/	/	/	/	/	/	/	/	/	/	/
K02047	/	/	/	/	/	/	/	/	/	/	/	/	/	/	/	/	/	/	/	/	Y	/	/	/	/	/	Y	/	/	/	/	/	/	/	/	/	/	/	/	/	/	/	/	/	/	/	/	/	/
K02048	/	/	/	/	/	/	/	/	/	/	/	/	/	/	/	/	/	/	/	/	Y	/	/	/	/	/	Y	/	/	/	/	/	/	/	/	/	/	/	/	/	/	/	/	/	/	/	/	/	/
K02049	Y	Y	/	/	Y	Y	Y	/	/	Y	/	/	Y	/	/	Y	Y	Y	/	/	Y	Y	Y	Y	/	Y	Y	Y	Y	Y	Y	Y	Y	Y	Y	Y	/	/	/	Y	/	/	Y	/	Y	/	/	Y	Y
K02050	Y	Y	/	/	Y	Y	Y	Y	/	Y	Y	/	Y	/	Y	Y	Y	Y	/	/	Y	Y	Y	Y	/	Y	/	/	Y	/	Y	Y	Y	Y	Y	Y	/	/	Y	Y	/	/	Y	/	Y	/	/	Y	Y
K02051	Y	Y	/	/	Y	/	Y	Y	/	Y	Y	/	Y	/	Y	Y	Y	Y	/	/	Y	/	Y	Y	/	Y	/	Y	Y	Y	Y	Y	Y	Y	Y	/	/	Y	/	Y	/	Y	Y	Y	/	/	/	Y	Y
K02052	/	/	/	/	/	/	/	/	/	/	/	/	Y	/	/	/	/	/	/	/	/	/	/	/	/	/	/	/	/	Y	/	/	/	/	/	/	/	/	/	/	/	/	Y	/	/	/	/	/	/
K02053	/	/	/	/	/	/	/	Y	/	/	/	/	Y	/	/	/	/	/	/	/	/	/	/	/	/	/	/	/	/	Y	/	/	/	/	/	/	/	/	/	/	/	/	Y	/	/	/	/	/	/
K02054	/	/	/	/	/	/	/	Y	/	/	/	/	Y	/	/	/	/	/	/	/	/	/	/	/	/	/	/	/	/	/	/	/	/	/	/	/	/	/	/	/	/	/	Y	/	/	/	/	/	/
K02055	/	/	/	/	/	/	/	Y	/	/	/	/	Y	/	/	/	/	/	/	/	/	/	/	/	/	/	/	/	/	Y	/	/	/	/	/	/	/	/	/	/	/	/	Y	/	/	/	/	/	/
K02056	Y	Y	/	Y	/	/	Y	Y	/	/	Y	Y	Y	/	Y	/	/	/	/	Y	/	/	/	Y	/	Y	/	/	Y	Y	/	Y	/	Y	/	Y	/	/	Y	Y	/	/	Y	/	Y	/	Y	Y	/
K02057	Y	Y	/	Y	/	/	Y	Y	/	Y	Y	Y	Y	/	Y	/	/	/	/	Y	/	/	/	Y	/	Y	/	/	Y	Y	/	Y	/	Y	/	Y	/	/	Y	Y	/	/	Y	/	Y	Y	Y	Y	/
K02058	/	Y	/	Y	/	/	/	Y	/	/	/	Y	Y	/	/	/	/	/	/	/	/	/	/	/	/	Y	/	/	/	/	/	/	/	Y	/	Y	/	/	/	Y	/	/	/	/	Y	/	/	/	/
K02062	/	/	/	/	/	/	/	/	/	Y	/	/	/	/	/	/	/	/	/	/	/	/	/	/	/	/	/	/	/	/	/	/	/	/	/	/	/	/	/	/	/	/	/	/	/	/	/	/	/
K02063	/	/	/	/	/	/	/	Y	/	Y	/	/	/	/	/	/	/	/	/	/	/	/	/	/	/	/	/	/	/	/	/	/	/	/	/	/	/	/	/	/	/	/	Y	/	/	/	/	/	/
K02064	/	/	/	/	/	/	/	Y	/	Y	/	/	/	/	/	/	/	/	/	/	/	/	/	/	Y	/	/	/	/	/	/	/	/	/	/	/	/	Y	/	/	/	Y	Y	/	/	/	/	/	/
K02065	/	/	Y	/	/	Y	/	/	/	/	/	Y	Y	Y	/	/	Y	Y	Y	Y	/	Y	Y	/	Y	/	Y	/	/	/	/	/	Y	/	Y	/	Y	Y	/	Y	Y	Y	/	Y	/	/	/	Y	/
K02066	/	/	Y	/	/	Y	/	/	/	/	/	Y	Y	Y	/	/	Y	Y	Y	Y	/	Y	Y	/	Y	/	Y	/	/	/	/	/	Y	/	/	/	Y	Y	/	Y	Y	Y	/	Y	/	/	/	/	/
K02067	/	/	/	/	/	Y	/	/	/	/	/	/	Y	/	/	/	/	/	/	Y	/	Y	Y	/	Y	/	Y	/	/	/	/	/	Y	/	/	/	Y	Y	/	Y	/	Y	/	Y	/	/	/	/	/
K02068	/	/	/	/	/	/	Y	/	/	/	/	/	/	/	Y	/	/	/	Y	/	/	/	/	/	/	/	/	/	/	Y	/	/	/	/	/	/	/	/	Y	/	Y	Y	/	/	/	/	/	/	/
K02069	/	/	/	Y	/	/	Y	/	/	/	/	/	/	/	Y	/	/	/	/	/	/	/	/	/	/	/	/	/	/	Y	/	/	/	/	/	/	/	/	Y	/	Y	Y	/	/	/	/	/	/	/
K02071	/	/	/	/	Y	/	/	/	/	Y	/	/	/	/	/	/	/	/	/	/	Y	/	/	/	/	Y	/	/	Y	/	/	/	/	/	/	Y	/	/	/	/	/	/	/	/	/	/	Y	/	/
K02072	/	/	/	/	Y	/	/	/	/	Y	/	/	/	/	/	/	/	/	/	/	Y	/	/	/	/	Y	/	/	Y	/	/	/	/	/	/	Y	/	/	/	/	/	/	Y	/	/	/	Y	/	/
K02073	/	/	/	/	/	/	/	/	/	Y	/	/	/	/	/	/	/	/	/	/	Y	/	/	/	/	Y	/	/	Y	/	/	/	/	/	/	Y	/	/	/	/	/	/	Y	/	/	/	Y	/	/
K02074	/	/	/	/	/	/	/	/	/	/	/	/	/	Y	/	/	/	/	Y	/	Y	/	/	/	/	/	/	/	/	/	/	/	/	/	/	/	/	/	/	/	/	/	/	/	/	/	/	/	/
K02075	/	/	/	/	/	/	/	/	/	/	/	/	/	Y	/	/	/	/	Y	/	/	/	/	/	/	/	/	/	/	/	Y	/	/	/	/	/	/	/	/	/	/	/	/	/	/	Y	/	/	/
K02076	/	/	/	/	Y	/	/	/	/	/	/	/	/	/	/	/	/	/	/	/	/	/	/	/	/	/	/	/	/	/	/	/	/	/	/	/	/	/	/	/	/	/	/	/	/	/	/	/	/
K02077	/	/	/	/	/	/	/	/	/	Y	/	/	/	/	/	/	/	/	/	/	/	/	/	/	/	/	/	/	/	/	Y	/	/	/	/	/	/	/	/	/	/	/	Y	/	/	Y	/	Y	/
K02078	Y	Y	Y	Y	Y	Y	Y	Y	Y	Y	/	Y	Y	Y	Y	Y	Y	Y	Y	Y	Y	Y	Y	Y	Y	Y	Y	Y	Y	/	/	Y	Y	Y	Y	Y	Y	Y	Y	Y	Y	Y	Y	Y	Y	Y	Y	Y	Y
K02079	/	/	/	/	/	/	/	/	/	/	/	/	/	/	/	/	/	/	/	/	/	/	/	/	/	/	/	/	/	/	/	/	/	/	/	/	/	/	/	/	/	/	/	/	/	/	/	/	/
K02080	/	/	/	/	/	/	/	/	/	/	/	/	/	/	/	/	/	/	/	/	/	/	/	/	/	/	/	/	/	/	/	/	/	/	/	/	/	/	/	/	/	/	/	/	/	/	/	/	/
K02081	/	Y	/	/	/	/	/	/	/	Y	/	Y	/	/	/	Y	Y	/	/	/	/	Y	/	Y	/	/	Y	/	/	/	/	/	/	/	Y	/	/	/	/	/	/	/	/	/	/	/	/	/	Y
K02082	/	/	/	/	/	/	/	/	/	Y	/	/	/	/	/	/	/	/	/	/	/	/	/	/	/	/	/	/	/	/	/	/	/	/	Y	/	/	/	/	/	/	/	/	/	/	/	/	/	/
K02083	/	/	/	/	/	/	/	/	/	/	/	/	/	/	/	/	/	/	/	/	/	/	/	/	/	/	/	/	/	Y	/	/	/	/	/	/	/	/	/	/	/	/	/	/	/	/	/	/	/
K02084	/	/	/	/	/	/	/	/	/	/	/	/	/	/	/	/	/	/	/	/	/	/	/	/	/	/	/	/	/	/	/	/	/	/	/	/	/	/	/	/	/	/	/	/	/	/	/	/	/
K02085	/	/	/	/	/	/	/	/	/	/	/	/	/	/	/	/	/	/	/	/	/	/	/	/	/	/	/	/	/	/	/	/	/	/	/	/	/	/	/	/	/	/	/	/	/	/	/	/	/
K02086	/	/	/	/	/	/	/	/	/	/	/	/	/	/	/	/	/	/	/	/	/	/	/	/	/	/	/	/	/	/	/	Y	/	/	/	/	/	/	/	/	/	/	/	/	/	/	/	/	/
K02087	/	/	/	/	/	/	/	/	/	/	/	/	/	/	/	/	/	/	/	/	/	/	/	/	/	/	/	/	/	/	/	/	/	/	/	/	/	/	/	/	/	/	/	/	/	/	/	/	/
K02088	/	/	/	/	/	/	/	/	/	/	/	/	/	/	/	/	/	/	/	/	/	/	/	/	/	/	/	/	/	/	/	/	/	/	/	/	/	/	/	/	/	/	/	/	/	/	/	/	/
K02089	/	/	/	/	/	/	/	/	/	/	/	/	/	/	/	/	/	/	/	/	/	/	/	/	/	/	/	/	/	/	/	/	/	/	/	/	/	/	/	/	/	/	/	/	/	/	/	/	/
K02090	/	/	/	/	/	/	/	/	/	/	/	/	/	/	/	/	/	/	/	/	/	/	/	/	/	/	/	/	/	/	/	/	/	/	/	/	/	/	/	/	/	/	/	/	/	/	/	/	/
K02091	/	/	/	/	/	/	/	/	/	/	/	/	/	/	/	/	/	/	/	/	/	/	/	/	/	/	/	/	/	/	/	/	/	/	/	/	/	/	/	/	/	/	/	/	/	/	/	/	/
K02092	/	/	/	/	/	/	/	/	/	/	/	/	/	/	/	/	/	/	/	/	/	/	/	/	/	/	/	/	/	/	/	/	/	/	/	/	/	/	/	/	/	/	/	/	/	/	/	/	/
K02093	/	/	/	/	/	/	/	/	/	/	/	/	/	/	/	/	/	/	/	/	/	/	/	/	/	/	/	/	/	/	/	/	/	/	/	/	/	/	/	/	/	/	/	/	/	/	/	/	/
K02094	/	/	/	/	/	/	/	/	/	/	/	/	/	/	/	/	/	/	/	/	/	/	/	/	/	/	/	/	/	/	/	/	/	/	/	/	/	/	/	/	/	/	/	/	/	/	/	/	/
K02095	/	/	/	/	/	/	/	/	/	/	/	/	/	/	/	/	/	/	/	/	/	/	/	/	/	/	/	/	/	/	/	/	/	/	/	/	/	/	/	/	/	/	/	/	/	/	/	/	/
K02096	/	/	/	/	/	/	/	/	/	/	/	/	/	/	/	/	/	/	/	/	/	/	/	/	/	/	/	/	/	/	/	/	/	/	/	/	/	/	/	/	/	/	/	/	/	/	/	/	/
K02097	/	/	/	/	/	/	/	/	/	/	/	/	/	/	/	/	/	/	/	/	/	/	/	/	/	/	/	/	/	/	/	/	/	/	/	/	/	/	/	/	/	/	/	/	/	/	/	/	/
K02098	/	/	/	/	/	/	/	/	/	/	/	/	/	/	/	/	/	/	/	/	/	/	/	/	/	/	/	/	/	/	/	/	/	/	/	/	/	/	/	/	/	/	/	/	/	/	/	/	/
K02099	/	/	/	/	/	/	/	/	/	/	/	/	/	/	/	/	/	/	/	/	/	/	/	/	/	/	/	/	/	/	/	/	/	/	/	/	/	/	/	/	/	/	/	/	/	/	/	/	/
K02100	/	/	/	/	/	/	/	/	Y	/	/	/	/	/	/	/	/	/	/	/	/	/	/	/	/	/	/	/	/	/	/	/	/	/	/	/	Y	/	/	/	Y	/	/	/	/	/	/	/	/
K02101	/	/	/	/	/	/	/	/	/	/	/	/	/	/	/	/	/	/	/	/	/	/	/	/	/	/	/	/	/	/	/	/	/	/	/	/	/	/	/	/	/	/	/	/	/	/	/	/	/
K02103	/	/	/	/	/	/	/	/	/	Y	/	Y	/	/	/	Y	Y	/	/	/	/	/	/	Y	/	/	/	/	Y	/	/	/	/	Y	/	/	/	/	/	/	/	/	/	/	/	/	/	Y	/
K02104	/	/	/	/	/	/	/	/	/	/	/	/	/	/	/	/	/	/	/	/	/	/	/	/	/	/	/	/	/	/	/	/	/	/	/	/	/	/	/	/	/	/	/	/	/	/	/	/	/
K02105	/	/	/	/	/	/	/	/	/	/	/	/	/	/	/	/	/	/	/	/	/	/	/	/	/	/	/	/	/	/	/	/	/	/	/	/	/	/	/	/	/	/	/	/	/	/	/	/	/
K02106	/	/	/	/	/	/	/	/	/	/	/	/	Y	/	/	/	/	/	/	/	/	/	Y	/	/	/	/	/	/	Y	/	/	/	/	/	Y	/	/	/	/	/	/	/	/	/	/	/	/	/
K02107	/	/	/	/	/	/	/	/	/	/	/	/	/	/	/	/	/	/	/	/	/	/	/	/	/	/	/	/	/	/	Y	/	/	/	/	/	/	/	/	/	/	/	/	/	/	/	/	/	/
K02108	Y	Y	Y	Y	Y	/	/	Y	Y	/	Y	Y	Y	Y	Y	Y	Y	/	Y	/	Y	Y	Y	Y	/	Y	Y	Y	Y	Y	/	Y	Y	/	/	/	/	/	/	Y	Y	/	Y	/	Y	Y	/	/	Y
K02109	/	/	/	/	/	/	/	Y	/	/	Y	/	Y	/	Y	/	/	/	/	/	Y	Y	Y	/	/	/	Y	Y	Y	Y	/	Y	Y	/	/	/	/	/	/	Y	/	/	Y	/	/	/	Y	/	/
K02110	Y	Y	Y	/	/	/	/	Y	/	Y	Y	Y	Y	/	Y	/	/	/	/	/	Y	Y	Y	Y	/	Y	/	Y	Y	Y	/	Y	Y	/	Y	/	/	/	/	Y	Y	/	Y	/	Y	/	/	/	/
K02111	Y	Y	Y	Y	Y	/	/	Y	/	Y	Y	Y	Y	Y	Y	Y	Y	/	Y	/	Y	Y	Y	Y	/	/	Y	Y	Y	Y	/	Y	Y	/	/	/	/	/	/	Y	Y	/	Y	/	Y	/	/	/	/
K02112	Y	Y	Y	Y	Y	/	/	Y	/	Y	Y	Y	/	Y	/	/	Y	/	Y	/	Y	Y	Y	Y	/	Y	Y	Y	Y	Y	/	Y	Y	/	/	/	/	/	/	Y	Y	/	Y	/	Y	/	/	/	Y
K02113	Y	/	Y	/	Y	/	/	Y	/	/	/	Y	Y	Y	/	/	Y	/	Y	/	Y	Y	Y	Y	/	Y	Y	Y	Y	/	/	Y	Y	/	/	/	/	/	/	Y	/	/	Y	/	/	/	/	/	/
K02114	/	Y	Y	/	Y	/	/	Y	/	/	Y	/	Y	Y	Y	Y	/	/	/	/	Y	Y	/	Y	/	Y	Y	Y	Y	Y	/	/	Y	/	/	/	/	/	/	Y	Y	/	Y	/	Y	Y	/	/	Y
K02115	Y	Y	Y	/	Y	/	/	Y	Y	Y	Y	Y	Y	Y	/	Y	Y	/	/	/	Y	Y	Y	Y	/	Y	Y	Y	Y	Y	/	Y	Y	/	Y	/	/	/	/	Y	Y	/	Y	/	/	Y	/	/	/
K02116	/	/	/	/	/	/	/	/	/	/	Y	/	/	/	/	/	/	/	/	/	/	/	Y	/	/	/	/	/	/	Y	/	/	/	/	/	/	/	/	/	Y	Y	/	/	/	/	/	/	/	/
K02117	/	/	/	Y	/	Y	Y	/	/	Y	Y	/	/	/	Y	Y	/	Y	/	Y	/	Y	/	Y	/	/	/	Y	/	Y	Y	/	/	Y	/	/	Y	Y	/	/	Y	/	/	Y	Y	Y	Y	/	Y
K02118	/	/	/	Y	/	Y	Y	/	/	Y	Y	/	/	/	Y	Y	/	Y	/	Y	/	Y	/	Y	Y	/	/	Y	/	Y	Y	/	/	Y	/	Y	Y	Y	Y	/	Y	Y	Y	Y	Y	/	Y	/	Y
K02119	/	/	/	/	/	Y	Y	/	/	/	Y	/	/	/	/	/	/	/	/	Y	/	/	/	Y	/	/	/	Y	/	Y	Y	/	/	Y	/	/	/	/	/	/	/	/	/	/	/	/	Y	/	/
K02120	/	/	/	Y	/	Y	Y	/	/	Y	Y	/	/	/	Y	/	/	Y	/	Y	/	Y	/	Y	Y	/	/	Y	/	Y	Y	/	/	Y	/	Y	/	Y	Y	/	Y	Y	Y	Y	Y	/	Y	/	Y
K02121	/	/	/	/	/	/	/	/	/	/	Y	/	/	/	Y	/	/	/	/	Y	/	Y	/	/	Y	/	/	/	/	/	Y	/	/	Y	/	/	Y	Y	/	/	/	Y	/	Y	/	Y	Y	/	/
K02122	/	/	/	/	/	Y	Y	/	/	Y	Y	/	/	/	/	Y	/	Y	/	Y	/	/	/	Y	/	/	/	Y	/	/	Y	/	/	Y	/	Y	/	/	Y	/	Y	/	/	/	/	/	Y	/	Y
K02123	/	/	/	/	/	/	Y	/	/	/	Y	/	/	/	Y	/	/	/	/	Y	/	Y	/	Y	/	/	/	Y	/	/	Y	/	/	Y	/	Y	/	Y	Y	/	Y	Y	Y	Y	Y	/	Y	/	Y
K02124	/	/	/	Y	/	/	Y	/	/	Y	Y	/	/	/	Y	Y	/	Y	/	Y	/	Y	/	Y	Y	/	/	Y	/	Y	Y	/	/	Y	/	Y	Y	Y	Y	/	Y	Y	Y	Y	Y	/	Y	/	Y
K02125	/	/	/	/	/	/	/	/	/	/	/	/	/	/	/	/	/	/	/	/	/	/	/	/	/	/	/	/	/	/	/	/	/	/	/	/	/	/	/	/	/	/	/	/	/	/	/	/	/
K02126	/	/	/	/	/	/	/	/	/	/	/	/	/	/	/	/	/	/	/	/	/	/	/	/	/	/	/	/	/	/	/	/	/	/	/	/	/	/	/	/	/	/	/	/	/	/	/	/	/
K02127	/	/	/	/	/	/	/	/	/	/	/	/	/	/	/	/	/	/	/	/	/	/	/	/	/	/	/	/	/	/	/	/	/	/	/	/	/	/	/	/	/	/	/	/	/	/	/	/	/
K02128	/	/	/	/	/	/	/	/	/	/	/	/	/	/	/	/	/	/	/	/	/	/	/	/	/	/	/	/	/	/	/	/	/	/	/	/	/	/	/	/	/	/	/	/	/	/	/	/	/
K02129	/	/	/	/	/	/	/	/	/	/	/	/	/	/	/	/	/	/	/	/	/	/	/	/	/	/	/	/	/	/	/	/	/	/	/	/	/	/	/	/	/	/	/	/	/	/	/	/	/
K02130	/	/	/	/	/	/	/	/	/	/	/	/	/	/	/	/	/	/	/	/	/	/	/	/	/	/	/	/	/	/	/	/	/	/	/	/	/	/	/	/	/	/	/	/	/	/	/	/	/
K02131	/	/	/	/	/	/	/	/	/	/	/	/	/	/	/	/	/	/	/	/	/	/	/	/	/	/	/	/	/	/	/	/	/	/	/	/	/	/	/	/	/	/	/	/	/	/	/	/	/
K02132	/	/	/	/	/	/	/	/	/	/	/	/	/	/	/	/	/	/	/	/	/	/	/	/	/	/	/	/	/	/	/	/	/	/	/	/	/	/	/	/	/	/	/	/	/	/	/	/	/
K02133	/	/	/	/	/	/	/	/	/	/	/	/	/	/	/	/	/	/	/	/	/	/	/	/	/	/	/	/	/	/	/	/	/	/	/	/	/	/	/	/	/	/	/	/	/	/	/	/	/
K02134	/	/	/	/	/	/	/	/	/	/	/	/	/	/	/	/	/	/	/	/	/	/	/	/	/	/	/	/	/	/	/	/	/	/	/	/	/	/	/	/	/	/	/	/	/	/	/	/	/
K02135	/	/	/	/	/	/	/	/	/	/	/	/	/	/	/	/	/	/	/	/	/	/	/	/	/	/	/	/	/	/	/	/	/	/	/	/	/	/	/	/	/	/	/	/	/	/	/	/	/
K02136	/	/	/	/	/	/	/	/	/	/	/	/	/	/	/	/	/	/	/	/	/	/	/	/	/	/	/	/	/	/	/	/	/	/	/	/	/	/	/	/	/	/	/	/	/	/	/	/	/
K02137	/	/	/	/	/	/	/	/	/	/	/	/	/	/	/	/	/	/	/	/	/	/	/	/	/	/	/	/	/	/	/	/	/	/	/	/	/	/	/	/	/	/	/	/	/	/	/	/	/
K02138	/	/	/	/	/	/	/	/	/	/	/	/	/	/	/	/	/	/	/	/	/	/	/	/	/	/	/	/	/	/	/	/	/	/	/	/	/	/	/	/	/	/	/	/	/	/	/	/	/
K02139	/	/	/	/	/	/	/	/	/	/	/	/	/	/	/	/	/	/	/	/	/	/	/	/	/	/	/	/	/	/	/	/	/	/	/	/	/	/	/	/	/	/	/	/	/	/	/	/	/
K02140	/	/	/	/	/	/	/	/	/	/	/	/	/	/	/	/	/	/	/	/	/	/	/	/	/	/	/	/	/	/	/	/	/	/	/	/	/	/	/	/	/	/	/	/	/	/	/	/	/
K02141	/	/	/	/	/	/	/	/	/	/	/	/	/	/	/	/	/	/	/	/	/	/	/	/	/	/	/	/	/	/	/	/	/	/	/	/	/	/	/	/	/	/	/	/	/	/	/	/	/
K02142	/	/	/	/	/	/	/	/	/	/	/	/	/	/	/	/	/	/	/	/	/	/	/	/	/	/	/	/	/	/	/	/	/	/	/	/	/	/	/	/	/	/	/	/	/	/	/	/	/
K02143	/	/	/	/	/	/	/	/	/	/	/	/	/	/	/	/	/	/	/	/	/	/	/	/	/	/	/	/	/	/	/	/	/	/	/	/	/	/	/	/	/	/	/	/	/	/	/	/	/
K02144	/	/	/	/	/	/	/	/	/	/	/	/	/	/	/	/	/	/	/	/	/	/	/	/	/	/	/	/	/	/	/	/	/	/	/	/	/	/	/	/	/	/	/	/	/	/	/	/	/
K02145	/	/	/	/	/	/	/	/	/	/	/	/	/	/	/	/	/	/	/	/	/	/	/	/	/	/	/	/	/	/	/	/	/	/	/	/	/	/	/	/	/	/	/	/	/	/	/	/	/
K02146	/	/	/	/	/	/	/	/	/	/	/	/	/	/	/	/	/	/	/	/	/	/	/	/	/	/	/	/	/	/	/	/	/	/	/	/	/	/	/	/	/	/	/	/	/	/	/	/	/
K02147	/	/	/	/	/	/	/	/	/	/	/	/	/	/	/	/	/	/	/	/	/	/	/	/	/	/	/	/	/	/	/	/	/	/	/	/	/	/	/	/	/	/	/	/	/	/	/	/	/
K02148	/	/	/	/	/	/	/	/	/	/	/	/	/	/	/	/	/	/	/	/	/	/	/	/	/	/	/	/	/	/	/	/	/	/	/	/	/	/	/	/	/	/	/	/	/	/	/	/	/
K02149	/	/	/	/	/	/	/	/	/	/	/	/	/	/	/	/	/	/	/	/	/	/	/	/	/	/	/	/	/	/	/	/	/	/	/	/	/	/	/	/	/	/	/	/	/	/	/	/	/
K02150	/	/	/	/	/	/	/	/	/	/	/	/	/	/	/	/	/	/	/	/	/	/	/	/	/	/	/	/	/	/	/	/	/	/	/	/	/	/	/	/	/	/	/	/	/	/	/	/	/
K02151	/	/	/	/	/	/	/	/	/	/	/	/	/	/	/	/	/	/	/	/	/	/	/	/	/	/	/	/	/	/	/	/	/	/	/	/	/	/	/	/	/	/	/	/	/	/	/	/	/
K02152	/	/	/	/	/	/	/	/	/	/	/	/	/	/	/	/	/	/	/	/	/	/	/	/	/	/	/	/	/	/	/	/	/	/	/	/	/	/	/	/	/	/	/	/	/	/	/	/	/
K02153	/	/	/	/	/	/	/	/	/	/	/	/	/	/	/	/	/	/	/	/	/	/	/	/	/	/	/	/	/	/	/	/	/	/	/	/	/	/	/	/	/	/	/	/	/	/	/	/	/
K02154	/	/	/	/	/	/	/	/	/	/	/	/	/	/	/	/	/	/	/	/	/	/	/	/	/	/	/	/	/	/	/	/	/	/	/	/	/	/	/	/	/	/	/	/	/	/	/	/	/
K02155	/	/	/	/	/	/	/	/	/	/	/	/	/	/	/	/	/	/	/	/	/	/	/	/	/	/	/	/	/	/	/	/	/	/	/	/	/	/	/	/	/	/	/	/	/	/	/	/	/
K02156	/	/	/	/	/	/	/	/	/	/	/	/	/	/	/	/	/	/	/	/	/	/	/	/	/	/	/	/	/	/	/	/	/	/	/	/	/	/	/	/	/	/	/	/	/	/	/	/	/
K02157	/	/	/	/	/	/	/	/	/	/	/	/	/	/	/	/	/	/	/	/	/	/	/	/	/	/	/	/	/	/	/	/	/	/	/	/	/	/	/	/	/	/	/	/	/	/	/	/	/
K02158	/	/	/	/	/	/	/	/	/	/	/	/	/	/	/	/	/	/	/	/	/	/	/	/	/	/	/	/	/	/	/	/	/	/	/	/	/	/	/	/	/	/	/	/	/	/	/	/	/
K02159	/	/	/	/	/	/	/	/	/	/	/	/	/	/	/	/	/	/	/	/	/	/	/	/	/	/	/	/	/	/	/	/	/	/	/	/	/	/	/	/	/	/	/	/	/	/	/	/	/
K02160	Y	/	Y	Y	Y	/	/	/	/	Y	/	Y	/	Y	Y	Y	Y	/	Y	/	/	/	Y	/	/	Y	Y	/	Y	/	/	/	/	/	Y	Y	/	/	Y	/	Y	/	/	/	/	Y	/	Y	Y
K02161	/	/	/	/	/	/	/	/	/	/	/	/	/	/	/	/	/	/	/	/	/	/	/	/	/	/	/	/	/	/	/	/	/	/	/	/	/	/	/	/	/	/	/	/	/	/	/	/	/
K02162	/	/	/	/	/	/	/	/	/	/	/	/	/	/	/	/	/	/	/	/	/	/	/	/	/	/	/	/	/	/	/	/	/	/	/	/	/	/	/	/	/	/	/	/	/	/	/	/	/
K02163	/	/	/	/	/	/	/	/	/	/	/	/	/	/	/	/	/	/	/	/	/	/	/	/	/	/	/	/	/	/	/	/	/	/	/	/	/	/	/	/	/	/	/	/	/	/	/	/	/
K02164	/	/	/	/	/	/	/	/	/	/	/	/	/	/	/	/	/	/	/	/	/	/	/	/	/	/	/	/	/	/	/	/	/	/	/	/	/	/	/	/	/	/	/	/	/	/	/	/	/
K02165	/	/	/	/	/	/	/	/	/	/	/	/	/	/	/	/	/	/	/	/	/	/	/	/	/	/	/	/	/	/	/	/	/	/	/	/	/	/	/	/	/	/	/	/	/	/	/	/	/
K02166	/	/	/	/	/	/	/	/	/	/	/	/	/	/	/	/	/	/	/	/	/	/	/	/	/	/	/	/	/	/	/	/	/	/	/	/	/	/	/	/	/	/	/	/	/	/	/	/	/
K02167	/	/	/	/	/	/	/	/	/	/	/	/	/	/	/	/	/	/	/	/	/	/	/	/	/	/	/	/	/	/	/	/	/	/	/	/	/	/	/	/	/	/	/	/	/	/	/	/	/
K02168	/	/	/	/	/	/	/	/	/	/	/	/	/	/	/	/	/	/	/	/	/	/	/	/	/	/	/	/	/	/	/	/	/	/	/	/	/	/	/	/	/	/	Y	/	/	/	/	/	/
K02169	/	/	/	/	/	/	/	/	/	/	/	/	/	/	/	/	/	/	/	/	/	/	/	/	/	/	/	/	/	/	/	/	/	/	/	/	/	/	/	/	/	/	/	/	/	/	/	/	/
K02170	/	/	/	/	/	/	Y	/	/	/	/	/	/	/	/	/	/	/	/	/	/	/	/	/	/	/	/	/	/	/	/	/	/	/	/	/	/	/	/	/	/	/	/	/	/	/	/	/	/
K02171	/	/	/	/	/	/	Y	/	/	/	/	/	/	/	/	/	/	/	/	/	/	/	/	/	/	/	/	/	/	/	/	/	/	Y	/	/	/	/	/	/	Y	/	/	/	/	/	/	/	/
K02172	/	/	/	/	/	/	/	/	/	/	/	/	/	/	/	/	/	/	/	/	/	/	/	/	/	/	/	/	/	/	/	/	/	/	/	/	/	/	/	/	/	/	/	/	/	/	/	/	/
K02173	/	/	/	/	/	/	/	/	/	/	/	/	/	/	/	/	/	/	/	/	/	/	/	/	/	/	/	/	/	/	/	/	/	/	/	/	/	/	/	/	/	/	Y	/	/	/	/	/	/
K02174	/	/	/	/	/	/	/	/	/	/	/	/	/	/	/	/	/	/	/	/	/	/	/	/	/	/	/	/	/	/	/	/	/	/	/	/	/	/	/	/	/	/	/	/	/	/	/	/	/
K02175	/	/	/	/	/	/	/	/	/	/	/	/	/	/	/	/	/	/	/	/	/	/	/	/	/	/	/	/	/	/	/	/	/	/	/	/	/	/	/	/	/	/	/	/	/	/	/	/	/
K02176	/	/	/	/	/	/	/	/	/	/	/	/	/	/	/	/	/	/	/	/	/	/	/	/	/	/	/	/	/	/	/	/	/	/	/	/	/	/	/	/	/	/	/	/	/	/	/	/	/
K02177	/	/	/	/	/	/	/	/	/	/	/	/	/	/	/	/	/	/	/	/	/	/	/	/	/	/	/	/	/	/	/	/	/	/	/	/	/	/	/	/	/	/	/	/	/	/	/	/	/
K02178	/	/	/	/	/	/	/	/	/	/	/	/	/	/	/	/	/	/	/	/	/	/	/	/	/	/	/	/	/	/	/	/	/	/	/	/	/	/	/	/	/	/	/	/	/	/	/	/	/
K02179	/	/	/	/	/	/	/	/	/	/	/	/	/	/	/	/	/	/	/	/	/	/	/	/	/	/	/	/	/	/	/	/	/	/	/	/	/	/	/	/	/	/	/	/	/	/	/	/	/
K02180	/	/	/	/	/	/	/	/	/	/	/	/	/	/	/	/	/	/	/	/	/	/	/	/	/	/	/	/	/	/	/	/	/	/	/	/	/	/	/	/	/	/	/	/	/	/	/	/	/
K02181	/	/	/	/	/	/	/	/	/	/	/	/	/	/	/	/	/	/	/	/	/	/	/	/	/	/	/	/	/	/	/	/	/	/	/	/	/	/	/	/	/	/	/	/	/	/	/	/	/
K02182	/	/	/	/	/	/	/	/	/	/	/	/	/	/	/	/	/	/	/	/	/	/	/	/	/	/	/	/	/	/	/	/	/	/	/	/	/	/	/	/	/	/	/	/	/	/	/	/	/
K02183	/	/	/	/	/	/	/	/	/	/	/	/	/	/	/	/	/	/	/	/	/	/	/	/	/	/	/	/	/	/	/	/	/	/	/	/	/	/	/	/	/	/	/	/	/	/	/	/	/
K02184	/	/	/	/	/	/	/	/	/	/	/	/	/	/	/	/	/	/	/	/	/	/	/	/	/	/	/	/	/	/	/	/	/	/	/	/	/	/	/	/	/	/	/	/	/	/	/	/	/
K02185	/	/	/	/	/	/	/	/	/	/	/	/	/	/	/	/	/	/	/	/	/	/	/	/	/	/	/	/	/	/	/	/	/	/	/	/	/	/	/	/	/	/	/	/	/	/	/	/	/
K02186	/	/	/	/	/	/	/	/	/	/	/	/	/	/	/	/	/	/	/	/	/	/	/	/	/	/	/	/	/	/	/	/	/	/	/	/	/	/	/	/	/	/	/	/	/	/	/	/	/
K02187	/	/	/	/	/	/	/	/	/	/	/	/	/	/	/	/	/	/	/	/	/	/	/	/	/	/	/	/	/	/	/	/	/	/	/	/	/	/	/	/	/	/	/	/	/	/	/	/	/
K02188	/	/	/	/	/	/	/	/	/	/	/	/	Y	/	/	/	/	/	/	/	/	/	Y	/	/	/	/	/	/	/	Y	/	/	/	/	/	/	/	/	/	/	/	/	/	Y	/	/	/	/
K02189	/	/	/	/	/	/	/	/	/	/	/	/	Y	/	/	/	/	/	/	/	/	/	/	/	/	/	/	/	/	/	Y	/	/	/	/	/	/	/	/	Y	/	/	/	/	/	/	/	/	/
K02190	/	/	/	/	/	/	/	/	/	/	/	/	Y	/	/	/	/	/	/	/	/	/	/	/	/	/	/	/	/	/	Y	/	/	/	/	/	/	/	/	Y	/	/	/	/	Y	/	/	/	/
K02191	/	/	/	/	/	/	/	/	/	/	/	/	/	/	/	/	/	/	/	/	/	/	/	/	/	/	/	/	/	/	Y	/	/	/	/	/	/	/	/	/	/	/	/	/	/	/	/	/	/
K02192	/	/	/	/	/	/	/	/	/	/	/	/	/	/	/	/	/	/	/	/	/	/	/	/	/	/	/	/	/	/	/	/	/	/	/	/	/	/	/	/	/	/	/	/	/	/	/	/	/
K02193	/	/	Y	/	/	/	/	/	/	/	/	Y	/	/	/	/	/	/	/	/	/	/	/	Y	/	/	/	/	Y	/	/	/	/	/	/	/	/	/	/	Y	/	/	/	/	/	/	/	Y	/
K02194	/	/	Y	/	/	/	/	/	/	/	/	Y	/	/	/	/	/	/	/	/	/	/	/	Y	/	/	/	/	Y	/	/	/	/	/	/	/	/	/	/	Y	/	/	/	/	/	/	/	Y	/
K02195	/	/	Y	/	/	/	/	/	/	/	/	Y	/	/	/	/	/	/	/	/	/	/	/	Y	/	/	/	/	Y	/	/	/	/	/	/	/	/	/	/	Y	/	/	/	/	/	/	/	Y	/
K02196	/	/	/	/	/	/	/	/	/	/	/	/	/	/	/	/	/	/	/	/	/	/	/	/	/	/	/	/	/	/	/	/	/	/	/	/	/	/	/	/	/	/	/	/	/	/	/	/	/
K02197	/	/	Y	/	/	/	/	/	/	/	/	Y	/	/	/	/	/	/	/	/	/	/	/	Y	/	/	/	/	Y	/	/	/	/	/	/	/	/	/	/	Y	/	/	/	/	/	/	/	Y	/
K02198	/	/	Y	/	/	/	/	/	/	/	/	Y	/	Y	/	/	/	/	/	/	/	/	/	/	/	/	/	/	Y	/	/	/	/	/	/	/	/	/	/	Y	/	/	/	/	/	/	/	/	/
K02199	/	/	/	/	/	Y	/	/	Y	/	/	/	Y	/	/	/	/	/	/	/	/	/	Y	Y	/	/	/	/	/	/	/	/	/	/	/	/	/	/	/	/	/	/	Y	/	/	/	/	Y	/
K02200	/	/	/	/	/	/	/	/	/	/	/	/	/	/	/	/	/	/	/	/	/	/	/	/	/	/	/	/	/	/	/	/	/	/	/	/	/	/	/	/	/	/	/	/	/	/	/	/	/
K02201	/	/	/	/	/	/	/	/	/	/	/	/	/	/	/	/	/	/	/	/	/	/	/	/	/	/	/	/	/	/	Y	/	/	/	/	/	/	/	/	/	/	/	/	/	/	/	/	/	/
K02202	/	/	/	/	/	/	/	/	/	/	/	/	/	/	/	/	/	/	/	/	/	/	/	/	/	/	/	/	/	/	/	/	/	/	/	/	/	/	/	/	/	/	/	/	/	/	/	/	/
K02203	/	/	/	/	/	/	/	Y	/	/	/	/	/	/	/	/	/	/	/	/	Y	/	/	/	/	/	/	/	/	/	/	/	Y	/	/	/	/	/	/	/	/	/	/	/	/	/	/	/	/
K02204	/	/	/	Y	/	/	/	/	Y	/	/	/	/	/	/	/	/	/	/	/	/	/	/	/	/	/	/	/	/	/	/	/	/	/	/	/	/	/	/	/	/	/	/	/	/	/	/	/	/
K02205	/	/	/	/	/	/	/	/	/	/	/	/	/	/	/	/	/	/	/	/	/	/	/	/	/	/	/	/	/	/	/	/	/	/	/	/	/	/	/	/	/	/	/	/	/	/	/	/	/
K02206	/	/	/	/	/	/	/	/	/	/	/	/	/	/	/	/	/	/	/	/	/	/	/	/	/	/	/	/	/	/	/	/	/	/	/	/	/	/	/	/	/	/	/	/	/	/	/	/	/
K02207	/	/	/	/	/	/	/	/	/	/	/	/	/	/	/	/	/	/	/	/	/	/	/	/	/	/	/	/	/	/	/	/	/	/	/	/	/	/	/	/	/	/	/	/	/	/	/	/	/
K02208	/	/	/	/	/	/	/	/	/	/	/	/	/	/	/	/	/	/	/	/	/	/	/	/	/	/	/	/	/	/	/	/	/	/	/	/	/	/	/	/	/	/	/	/	/	/	/	/	/
K02209	/	/	/	/	/	/	/	/	/	/	/	/	/	/	/	/	/	/	/	/	/	/	/	/	/	/	/	/	/	/	/	/	/	/	/	/	/	/	/	/	/	/	/	/	/	/	/	/	/
K02210	/	/	/	/	/	/	/	/	/	/	/	/	/	/	/	/	/	/	/	/	/	/	/	/	/	/	/	/	/	/	/	/	/	/	/	/	/	/	/	/	/	/	/	/	/	/	/	/	/
K02211	/	/	/	/	/	/	/	/	/	/	/	/	/	/	/	/	/	/	/	/	/	/	/	/	/	/	/	/	/	/	/	/	/	/	/	/	/	/	/	/	/	/	/	/	/	/	/	/	/
K02212	/	/	/	/	/	/	/	/	/	/	/	/	/	/	/	/	/	/	/	/	/	/	/	/	/	/	/	/	/	/	/	/	/	/	/	/	/	/	/	/	/	/	/	/	/	/	/	/	/
K02213	/	/	/	/	/	/	/	/	/	/	/	/	/	/	/	/	/	/	/	/	/	/	/	/	/	/	/	/	/	/	/	/	/	/	/	/	/	/	/	/	/	/	/	/	/	/	/	/	/
K02214	/	/	/	/	/	/	/	/	/	/	/	/	/	/	/	/	/	/	/	/	/	/	/	/	/	/	/	/	/	/	/	/	/	/	/	/	/	/	/	/	/	/	/	/	/	/	/	/	/
K02215	/	/	/	/	/	/	/	/	/	/	/	/	/	/	/	/	/	/	/	/	/	/	/	/	/	/	/	/	/	/	/	/	/	/	/	/	/	/	/	/	/	/	/	/	/	/	/	/	/
K02216	/	/	/	/	/	/	/	/	/	/	/	/	/	/	/	/	/	/	/	/	/	/	/	/	/	/	/	/	/	/	/	/	/	/	/	/	/	/	/	/	/	/	/	/	/	/	/	/	/
K02217	/	/	/	Y	/	/	/	/	/	/	/	/	Y	Y	/	Y	/	Y	/	Y	/	Y	/	/	/	Y	Y	/	Y	/	Y	/	Y	/	Y	Y	/	Y	Y	/	Y	Y	/	Y	Y	/	Y	Y	Y
K02218	/	/	/	/	/	/	/	/	/	/	/	/	/	/	/	/	/	/	/	/	/	/	/	/	/	/	/	/	/	/	/	/	/	/	/	/	/	/	/	/	/	/	/	/	/	/	/	/	/
K02219	/	/	/	/	/	/	/	/	/	/	/	/	/	/	/	/	/	/	/	/	/	/	/	/	/	/	/	/	/	/	/	/	/	/	/	/	/	/	/	/	/	/	/	/	/	/	/	/	/
K02220	/	/	/	/	/	/	/	/	/	/	/	/	/	/	/	/	/	/	/	/	/	/	/	/	/	/	/	/	/	/	/	/	/	/	/	/	/	/	/	/	/	/	/	/	/	/	/	/	/
K02221	Y	Y	/	/	Y	/	/	/	/	Y	Y	/	Y	/	/	/	/	/	/	/	Y	/	Y	Y	Y	Y	/	/	Y	/	/	Y	/	/	/	/	/	Y	/	Y	/	/	Y	/	/	/	/	Y	/
K02222	/	/	/	/	/	/	/	/	/	/	/	/	/	/	/	/	/	/	/	/	/	/	/	/	/	/	/	/	/	/	/	/	/	/	/	/	/	/	/	/	/	/	/	/	/	/	/	/	/
K02223	/	/	/	/	/	/	/	/	/	/	/	/	/	/	/	/	/	/	/	/	/	/	/	/	/	/	/	/	/	/	/	/	/	/	/	/	/	/	/	/	/	/	/	/	/	/	/	/	/
K02224	/	/	/	/	/	/	/	/	/	/	/	/	Y	/	/	/	/	/	/	/	/	/	Y	/	/	/	Y	/	/	Y	/	/	/	/	/	/	/	/	/	Y	/	/	/	/	Y	/	/	/	/
K02225	/	/	/	/	/	/	/	/	/	/	/	/	/	/	/	/	/	/	/	/	/	/	/	/	/	/	/	/	/	/	/	/	/	/	/	/	/	/	/	/	/	/	/	/	/	/	/	/	/
K02226	/	Y	Y	/	/	/	Y	/	/	Y	Y	Y	/	/	Y	/	/	/	/	Y	/	/	Y	/	/	Y	Y	Y	Y	Y	/	Y	/	/	/	/	/	/	/	Y	/	/	/	Y	Y	Y	Y	/	/
K02227	/	/	/	/	/	/	/	/	/	/	/	/	Y	/	/	/	/	/	/	/	Y	/	Y	/	/	/	/	Y	/	Y	Y	/	/	/	/	/	/	/	/	Y	/	/	/	Y	Y	/	/	/	/
K02228	/	/	/	/	/	/	/	/	/	/	/	/	/	/	/	/	/	/	/	/	/	/	/	/	/	/	/	/	/	/	/	/	/	/	/	/	/	/	/	/	/	/	/	/	/	/	/	/	/
K02229	/	/	/	/	/	/	/	/	/	/	/	/	/	/	/	/	/	/	/	/	/	/	/	/	/	/	/	/	/	/	/	/	/	/	/	/	/	/	/	/	/	/	/	/	/	/	/	/	/
K02230	/	/	/	/	/	/	/	/	/	/	/	/	/	/	/	/	/	/	/	/	/	/	Y	/	/	/	/	/	/	/	Y	/	/	/	/	/	/	/	/	Y	/	/	/	/	/	/	/	/	/
K02231	/	/	/	/	/	/	Y	Y	/	Y	Y	/	Y	Y	Y	/	/	/	/	/	Y	/	Y	/	/	/	Y	Y	/	/	/	/	/	/	Y	/	/	/	/	Y	/	/	/	/	Y	/	Y	/	/
K02232	/	/	/	/	/	/	/	/	/	/	/	/	/	/	/	/	/	/	/	/	/	/	Y	/	/	/	/	/	/	Y	Y	/	/	/	/	/	/	/	/	Y	/	/	/	Y	Y	/	/	/	/
K02233	/	/	/	/	/	/	Y	Y	/	Y	Y	/	Y	Y	Y	/	/	/	/	/	Y	/	Y	/	/	/	Y	Y	/	Y	Y	/	/	/	Y	/	/	/	/	Y	/	/	/	Y	Y	/	Y	/	/
K02234	/	/	/	/	/	/	/	/	/	/	/	/	/	/	/	/	/	/	/	/	/	/	/	/	/	/	/	/	/	/	/	/	/	/	/	/	/	/	/	/	Y	/	/	/	/	/	/	/	/
K02235	/	/	/	/	/	/	/	/	/	/	/	/	/	/	/	/	/	/	/	/	/	/	/	/	/	/	/	/	/	/	/	/	/	/	/	/	/	/	/	/	/	/	/	/	/	/	/	/	/
K02236	/	/	/	/	/	/	/	/	/	/	/	/	/	/	/	/	/	/	/	/	/	/	/	/	/	/	/	/	Y	/	/	/	/	/	/	/	/	/	/	/	/	/	/	/	/	/	/	/	/
K02237	/	Y	Y	Y	/	/	Y	Y	/	/	Y	Y	/	Y	Y	/	Y	/	Y	/	Y	/	/	Y	Y	/	/	Y	/	Y	/	Y	/	/	/	/	/	Y	/	/	Y	Y	/	/	Y	/	Y	/	Y
K02238	/	Y	Y	Y	/	/	/	Y	Y	Y	Y	Y	Y	/	Y	/	/	/	/	Y	Y	/	/	Y	Y	/	Y	Y	Y	Y	/	Y	/	Y	/	Y	Y	Y	Y	Y	/	Y	Y	/	/	/	Y	/	/
K02239	/	/	/	/	/	/	/	/	/	/	/	/	/	/	/	/	/	/	/	/	/	/	/	/	/	/	/	/	/	/	/	/	/	/	/	/	/	/	/	/	/	/	/	/	/	/	/	/	/
K02240	/	/	/	/	/	/	/	/	/	Y	/	/	/	/	/	/	/	/	/	/	/	/	/	/	/	/	/	/	Y	/	/	/	/	/	/	/	/	/	/	/	/	/	/	/	/	/	/	/	/
[truncated: 18,008 more rows]
[truncated: 157 more columns]
