# Supplementary material
Source: MDPI journal article supplement (https://www.mdpi.com/2311-5637/9/4/387)
Supplement: s1 [file s1 › Table S6.xlsx]

## Sheet: Sheet1
Table S6. Main pathways/genes in AD process of the GBs ("Y" indicates the GB contains complete pathway, and " /" indicates the GB does not contain complete pathway)
GB	Pathways/genes
	Conversion on benzene ring		Benzoyl-CoA degradation	Methanogenesis		Acetyl-CoA pathway
	bsdB	bsdCD		Aceticlastic	Hydrogenotrophic
UBA4975 sp012727415 FDU001	/	/	/	/	/	/
Propionicimonas sp.FDU008	/	/	/	/	/	/
DUNV01 sp.FDU015	Y	/	Y	/	/	/
Brooklawnia sp012517405 FDU021	/	/	/	/	/	/
Pirellulales sp.FDU027	Y	/	/	/	/	/
JAAZMI01 sp.FDU028	Y	/	Y	/	/	/
MVQK01 sp.FDU032	/	/	Y	/	/	/
LD21 sp.FDU033	Y	/	/	/	/	/
Syntrophosphaera sp012516855 FDU038	/	/	/	/	/	/
JAAYIG01 sp012523595 FDU053	Y	/	/	/	/	/
DUVQ01 sp.FDU055	/	/	/	/	/	/
MVQL01 sp.FDU057	Y	/	Y	/	/	/
SR-FBR-E99 sp009881065 FDU067	/	/	/	/	/	/
Methanobacteriaceae sp.FDU068	Y	/	/	/	Y	Y
DUQX01 sp012520035 FDU072	Y	/	Y	/	/	/
RBG-16-64-13 sp.FDU077	Y	Y	/	/	/	/
Propionicimonas sp.FDU080	/	/	/	/	/	/
Methanothrix soehngenii FDU082	Y	/	/	Y	/	Y
RBG-16-64-13 sp.FDU090	Y	/	/	/	/	/
UBA4975 sp002427015 FDU091	/	/	/	/	/	/
SZUA-584 sp.FDU096	/	/	/	/	/	/
DTU098 sp002305915 FDU100	Y	Y	/	/	/	/
Methanobacterium sp.FDU106	/	/	/	/	Y	Y
JACIYD01 sp.FDU114	Y	/	Y	/	/	/
SR-FBR-E99 sp.FDU123	Y	/	/	/	/	/
UBA4789 sp.FDU132	Y	Y	/	/	/	/
UBA5389 sp.FDU134	/	/	/	/	/	/
Advenella sp012923605 FDU136	Y	/	/	/	/	/
MVZN01 sp.FDU141	Y	/	/	/	/	/
PALSA-986 sp.FDU155	/	/	/	/	/	Y
Thermoguttaceae sp.FDU156	Y	/	/	/	/	/
58-81 sp002070395 FDU160	/	/	/	/	/	/
RBG-16-64-13 sp.FDU161	Y	Y	/	/	/	/
Syntrophus aciditrophicus FDU163	/	/	Y	/	/	/
Mesotoga infera_B FDU168	/	/	/	/	/	/
JAAZJW01 sp012519835 FDU174	/	/	/	/	/	/
Delta-02 sp002408185 FDU179	Y	/	Y	/	/	/
Fen-1166 sp.FDU185	/	/	/	/	/	/
Mesotoga sp002305955 FDU191	/	/	/	/	/	/
UBA4175 sp002379855 FDU193	/	/	/	/	/	/
Syntrophobacter fumaroxidans FDU195	Y	/	/	/	/	/
Thauera sp.FDU197	Y	/	/	/	/	/

## Sheet: Sheet2
Genomic bins	Number							Number	GB
bin.1	0.001	1	UBA4975 sp012727415 FDU001					0.001	bin.1	UBA4975 sp012727415 FDU001
bin.8	0.008	8	Propionicimonas sp.FDU008					0.002	bin.2	JAAYED01 sp.FDU002
bin.15	0.015	15	DUNV01 sp.FDU015					0.003	bin.3	UBA5829 sp.FDU003
bin.21	0.021	21	Brooklawnia sp012517405 FDU021					0.004	bin.4	T3SED10-260 sp.FDU004
bin.27	0.027	27	Pirellulales sp.FDU027					0.005	bin.5	JACIYB01 sp.FDU005
bin.28	0.028	28	JAAZMI01 sp.FDU028					0.006	bin.6	UBA8901 sp.FDU006
bin.32	0.032	32	MVQK01 sp.FDU032					0.007	bin.7	Ch29 sp.FDU007
bin.33	0.033	33	LD21 sp.FDU033					0.008	bin.8	Propionicimonas sp.FDU008
bin.38	0.038	38	Syntrophosphaera sp012516855 FDU038					0.009	bin.9	RBG-16-66-30 sp.FDU009
bin.53	0.053	52	JAAYIG01 sp012523595 FDU053					0.01	bin.10	DTU080 sp.FDU010
bin.55	0.055	54	DUVQ01 sp.FDU055					0.011	bin.11	UBA6794 sp.FDU011
bin.57	0.057	56	MVQL01 sp.FDU057					0.012	bin.12	UBA5829 sp.FDU012
bin.67	0.067	66	SR-FBR-E99 sp009881065 FDU067					0.013	bin.13	Syntrophobacterales sp.FDU013
bin.68	0.068	67	Methanobacteriaceae sp.FDU068					0.014	bin.14	JABUFB01 sp.FDU014
bin.72	0.072	71	DUQX01 sp012520035 FDU072					0.015	bin.15	DUNV01 sp.FDU015
bin.77	0.077	76	RBG-16-64-13 sp.FDU077					0.016	bin.16	JAAYBY01 sp.FDU016
bin.80	0.08	78	Propionicimonas sp.FDU080					0.017	bin.17	JAAYIR01 sp012523355 FDU017
bin.82	0.082	80	Methanothrix soehngenii FDU082					0.018	bin.18	Fermentibacter sp.FDU018
bin.90	0.09	88	RBG-16-64-13 sp.FDU090					0.019	bin.19	JABLXH01 sp.FDU019
bin.91	0.091	89	UBA4975 sp002427015 FDU091					0.02	bin.20	58-81 sp012729145 FDU020
bin.96	0.096	94	SZUA-584 sp.FDU096					0.021	bin.21	Brooklawnia sp012517405 FDU021
bin.100	0.1	98	DTU098 sp002305915 FDU100					0.022	bin.22	Mariniphaga sp.FDU022
bin.106	0.106	104	Methanobacterium sp.FDU106					0.023	bin.23	JAAYUK01 sp012517735 FDU023
bin.114	0.114	112	JACIYD01 sp.FDU114					0.024	bin.24	MWBF01 sp.FDU024
bin.123	0.123	121	SR-FBR-E99 sp.FDU123					0.025	bin.25	Cloacimonas sp002432865 FDU025
bin.132	0.132	130	UBA4789 sp.FDU132					0.026	bin.26	UBA5420 sp.FDU026
bin.134	0.134	132	UBA5389 sp.FDU134					0.027	bin.27	Pirellulales sp.FDU027
bin.136	0.136	134	Advenella sp012923605 FDU136					0.028	bin.28	JAAZMI01 sp.FDU028
bin.141	0.141	139	MVZN01 sp.FDU141					0.029	bin.29	DTU010 sp.FDU029
bin.155	0.155	153	PALSA-986 sp.FDU155					0.03	bin.30	Aminivibrio sp009929115 FDU030
bin.156	0.156	154	Thermoguttaceae sp.FDU156					0.031	bin.31	Methanothrix_A sp001602645 FDU031
bin.160	0.16	158	58-81 sp002070395 FDU160					0.032	bin.32	MVQK01 sp.FDU032
bin.161	0.161	159	RBG-16-64-13 sp.FDU161					0.033	bin.33	LD21 sp.FDU033
bin.163	0.163	161	Syntrophus aciditrophicus FDU163					0.034	bin.34	DSM-8532 sp.FDU034
bin.168	0.168	166	Mesotoga infera_B FDU168					0.035	bin.35	UBA1398 sp.FDU035
bin.174	0.174	172	JAAZJW01 sp012519835 FDU174					0.036	bin.36	DTU024 sp.FDU036
bin.179	0.179	177	Delta-02 sp002408185 FDU179					0.037	bin.37	UBA4179 sp002849245 FDU037
bin.185	0.185	183	Fen-1166 sp.FDU185					0.038	bin.38	Syntrophosphaera sp012516855 FDU038
bin.191	0.191	189	Mesotoga sp002305955 FDU191					0.039	bin.39	DUOT01 sp.FDU039
bin.193	0.193	191	UBA4175 sp002379855 FDU193					0.04	bin.40	Desulfovibrionaceae sp.FDU040
bin.195	0.195	193	Syntrophobacter fumaroxidans FDU195					0.041	bin.41	UBA2224 sp012719295 FDU041
bin.197	0.197	195	Thauera sp.FDU197					0.042	bin.42	Cloacimonadaceae sp.FDU042
								0.043	bin.43	UBA1383 sp002304945 FDU043
								0.044	bin.44	Bact-08 sp001897515 FDU044
								0.045	bin.45	UBA8910 sp012517485 FDU045
								0.046	bin.46	UBA2199 sp.FDU046
								0.047	bin.47	Syner-03 sp002316795 FDU047
								0.048	bin.48	DSUL01 sp.FDU048
								0.049	bin.49	JAAYKS01 sp.FDU049
								0.05	bin.50	UBA5266 sp002411545 FDU050
								0.051	bin.51	UBA5829 sp.FDU051
								0.053	bin.53	JAAYIG01 sp012523595 FDU053
								0.054	bin.54	Methanolinea sp002067485 FDU054
								0.055	bin.55	DUVQ01 sp.FDU055
								0.056	bin.56	UBA1032 sp.FDU056
								0.057	bin.57	MVQL01 sp.FDU057
								0.058	bin.58	Acetoanaerobium noterae FDU058
								0.059	bin.59	JAAYCB01 sp.FDU059
								0.06	bin.60	Petrimonas sp002356435 FDU060
								0.061	bin.61	Fen-1364 sp.FDU061
								0.062	bin.62	Syntrophorhabdus sp.FDU062
								0.063	bin.63	UBA1413 sp.FDU063
								0.064	bin.64	UBA2214 sp.FDU064
								0.065	bin.65	UBA1398 sp.FDU065
								0.066	bin.66	DTU019 sp.FDU066
								0.067	bin.67	SR-FBR-E99 sp009881065 FDU067
								0.068	bin.68	Methanobacteriaceae sp.FDU068
								0.069	bin.69	UBA4975 sp.FDU069
								0.07	bin.70	DTGP01 sp.FDU070
								0.071	bin.71	JAAYUJ01 sp012517775 FDU071
								0.072	bin.72	DUQX01 sp012520035 FDU072
								0.073	bin.73	DULO01 sp.FDU073
								0.074	bin.74	JAAYDI01 sp.FDU074
								0.075	bin.75	UBA1433 sp.FDU075
								0.076	bin.76	DTU022 sp.FDU076
								0.077	bin.77	RBG-16-64-13 sp.FDU077
								0.079	bin.79	Ch109 sp.FDU079
								0.08	bin.80	Propionicimonas sp.FDU080
								0.081	bin.81	UBA2241 sp.FDU081
								0.082	bin.82	Methanothrix soehngenii FDU082
								0.083	bin.83	Proteiniborus ethanoligenes FDU083
								0.084	bin.84	JAAYJV01 sp002070275 FDU084
								0.085	bin.85	PWPN01 sp.FDU085
								0.086	bin.86	UBA5829 sp.FDU086
								0.087	bin.87	Proteiniphilum sp.FDU087
								0.088	bin.88	DTJY01 sp.FDU088
								0.089	bin.89	SLSP01 sp.FDU089
								0.09	bin.90	RBG-16-64-13 sp.FDU090
								0.091	bin.91	UBA4975 sp002427015 FDU091
								0.092	bin.92	UBA1431 sp.FDU092
								0.093	bin.93	UBA6140 sp.FDU093
								0.094	bin.94	UBA1383 sp002305415 FDU094
								0.095	bin.95	DTJY01 sp.FDU095
								0.096	bin.96	SZUA-584 sp.FDU096
								0.097	bin.97	JAAYKM01 sp.FDU097
								0.098	bin.98	UBA6794 sp.FDU098
								0.099	bin.99	UBA5500 sp.FDU099
								0.1	bin.100	DTU098 sp002305915 FDU100
								0.101	bin.101	Hungateiclostridium sp.FDU101
								0.102	bin.102	Petrimonas mucosa FDU102
								0.103	bin.103	PWPN01 sp.FDU103
								0.104	bin.104	JAAYDC01 sp.FDU104
								0.105	bin.105	SR-FBR-E99 sp.FDU105
								0.106	bin.106	Methanobacterium sp.FDU106
								0.107	bin.107	MVYY01 sp.FDU107
								0.108	bin.108	Methanoregula sp.FDU108
								0.109	bin.109	DTIW01 sp.FDU109
								0.11	bin.110	QAXR01 sp003053505 FDU110
								0.111	bin.111	UBA5499 sp002426275 FDU111
								0.112	bin.112	JABLXU01 sp013177805 FDU112
								0.113	bin.113	UBA1398 sp002305165 FDU113
								0.114	bin.114	JACIYD01 sp.FDU114
								0.115	bin.115	Proteiniphilum saccharofermentans FDU115
								0.116	bin.116	Bellilinea sp.FDU116
								0.117	bin.117	49-20 sp012517865 FDU117
								0.118	bin.118	D2 sp.FDU118
								0.119	bin.119	Sedimentibacter sp003483345 FDU119
								0.12	bin.120	UBA8904 sp002070455 FDU120
								0.121	bin.121	Aminivibrio sp.FDU121
								0.122	bin.122	DSUL01 sp.FDU122
								0.123	bin.123	SR-FBR-E99 sp.FDU123
								0.124	bin.124	UBA2219 sp.FDU124
								0.125	bin.125	DTJY01 sp.FDU125
								0.126	bin.126	JAAYAV01 sp.FDU126
								0.127	bin.127	UBA5069 sp.FDU127
								0.128	bin.128	Proteiniphilum sp002410345 FDU128
								0.129	bin.129	LD21 sp012517605 FDU129
								0.13	bin.130	Sphaerochaeta sp012514185 FDU130
								0.131	bin.131	PALSA-986 sp012513715 FDU131
								0.132	bin.132	UBA4789 sp.FDU132
								0.133	bin.133	UBA8346 sp.FDU133
								0.134	bin.134	UBA5389 sp.FDU134
								0.135	bin.135	DTU008 sp001512965 FDU135
								0.136	bin.136	Advenella sp012923605 FDU136
								0.137	bin.137	UBA6126 sp.FDU137
								0.138	bin.138	DUVQ01 sp.FDU138
								0.139	bin.139	JAAXZI01 sp.FDU139
								0.14	bin.140	BRH-c25 sp.FDU140
								0.141	bin.141	MVZN01 sp.FDU141
								0.142	bin.142	DTGP01 sp.FDU142
								0.143	bin.143	UBA4975 sp.FDU143
								0.144	bin.144	UBA2279 sp.FDU144
								0.145	bin.145	UBA5420 sp012837925 FDU145
								0.146	bin.146	UBA2272 sp.FDU146
								0.147	bin.147	SLSP01 sp.FDU147
								0.148	bin.148	UBA4996 sp002396805 FDU148
								0.149	bin.149	UBA2256 sp001603165 FDU149
								0.15	bin.150	Cloacimonadaceae sp.FDU150
								0.151	bin.151	SZUA-584 sp.FDU151
								0.152	bin.152	UBA6103 sp.FDU152
								0.153	bin.153	DTKZ01 sp.FDU153
								0.154	bin.154	58-81 sp.FDU154
								0.155	bin.155	PALSA-986 sp.FDU155
								0.156	bin.156	Thermoguttaceae sp.FDU156
								0.157	bin.157	JAAYXZ01 sp012515635 FDU157
								0.158	bin.158	JACCES01 sp.FDU158
								0.159	bin.159	GCA-2748055 sp.FDU159
								0.16	bin.160	58-81 sp002070395 FDU160
								0.161	bin.161	RBG-16-64-13 sp.FDU161
								0.162	bin.162	PHAA01 sp.FDU162
								0.163	bin.163	Syntrophus aciditrophicus FDU163
								0.164	bin.164	UBA5209 sp.FDU164
								0.165	bin.165	Firm-13 sp.FDU165
								0.166	bin.166	Tissierella sp.FDU166
								0.167	bin.167	Actinotalea sp.FDU167
								0.168	bin.168	Mesotoga infera_B FDU168
								0.169	bin.169	RBG-16-64-13 sp.FDU169
								0.17	bin.170	Aminobacterium colombiense FDU170
								0.171	bin.171	UBA5072 sp.FDU171
								0.172	bin.172	Bact-08 sp.FDU172
								0.173	bin.173	Methanofastidiosum sp001587595 FDU173
								0.174	bin.174	JAAZJW01 sp012519835 FDU174
								0.175	bin.175	KH17 sp.FDU175
								0.176	bin.176	Spiro-10 sp004294945 FDU176
								0.177	bin.177	UBA11386 sp.FDU177
								0.178	bin.178	UBA4923 sp012511175 FDU178
								0.179	bin.179	Delta-02 sp002408185 FDU179
								0.18	bin.180	Methanolinea sp.FDU180
								0.181	bin.181	UBA8910 sp002069605 FDU181
								0.182	bin.182	Fen-1087 sp.FDU182
								0.183	bin.183	JAAYEA01 sp012689325 FDU183
								0.184	bin.184	Desulfotomaculaceae_A sp.FDU184
								0.185	bin.185	Fen-1166 sp.FDU185
								0.186	bin.186	UBA2268 sp.FDU186
								0.187	bin.187	UBA288 sp.FDU187
								0.188	bin.188	Methanosarcina mazei FDU188
								0.189	bin.189	JAAXZI01 sp012719955 FDU189
								0.19	bin.190	B3-TA06 sp.FDU190
								0.191	bin.191	Mesotoga sp002305955 FDU191
								0.192	bin.192	B3-TA06 sp012517375 FDU192
								0.193	bin.193	UBA4175 sp002379855 FDU193
								0.194	bin.194	UBA4971 sp012512055 FDU194
								0.195	bin.195	Syntrophobacter fumaroxidans FDU195
								0.196	bin.196	DTU059 sp.FDU196
								0.197	bin.197	Thauera sp.FDU197
								0.198	bin.198	JAAYBG01 sp012718985 FDU198
								0.199	bin.199	Bryobacteraceae sp.FDU199
								0.2	bin.200	UBA5352 sp.FDU200
								0.201	bin.201	UBA1419 sp002305585 FDU201
								0.202	bin.202	UBA2241 sp.FDU202
								0.203	bin.203	Lysinibacillus_B sp.FDU203
								0.204	bin.204	JAAYIR01 sp.FDU204
								0.205	bin.205	Fen-1342 sp.FDU205
								0.206	bin.206	Bact-08 sp009929175 FDU206
								0.207	bin.207	Proteiniclasticum sp003514505 FDU207
								0.208	bin.208	UBA4810 sp002418825 FDU208
